# Supplementary material for: Analysis of MicroRNA Expression in the Prepubertal Testis
Source: PLOS journal article supplement (doi:10.1371/journal.pone.0015317), 2010-12-29
Supplement: S3 (10.1371/journal.pone.0015317.s003) [file journal.pone.0015317.s003]

| miRNA           | Chr | Start    | Stop     | Strand | Type     | Position | P7 reads | P7%   | P10 reads | P10%  | P14 reads | P14%  |
|-----------------|-----|----------|----------|--------|----------|----------|----------|-------|-----------|-------|-----------|-------|
| mmu-let-7a-1-5p | 13  | 48633608 | 48633629 | -      | 5' Edit  | 5'       | 1595     | 0.4%  | 0         | 0.0%  | 696       | 0.6%  |
| mmu-let-7a-1-5p | 13  | 48633608 | 48633629 | -      | 5' Indel | 5'       | 104      | 0.0%  | 0         | 0.0%  | 36        | 0.0%  |
| mmu-let-7a-1-5p | 13  | 48633608 | 48633629 | -      | Indel    | 21       | 10       | 0.0%  | 0         | 0.0%  | 5         | 0.0%  |
| mmu-let-7a-1-5p | 13  | 48633608 | 48633629 | -      | edit     | 1        | 0        | 0.0%  | 0         | 0.0%  | 0         | 0.0%  |
| mmu-let-7a-1-5p | 13  | 48633608 | 48633629 | -      | edit     | 2        | 0        | 0.0%  | 0         | 0.0%  | 0         | 0.0%  |
| mmu-let-7a-1-5p | 13  | 48633608 | 48633629 | -      | edit     | 3        | 0        | 0.0%  | 0         | 0.0%  | 0         | 0.0%  |
| mmu-let-7a-1-5p | 13  | 48633608 | 48633629 | -      | edit     | 4        | 64       | 0.0%  | 46        | 0.0%  | 21        | 0.0%  |
| mmu-let-7a-1-5p | 13  | 48633608 | 48633629 | -      | edit     | 5        | 7        | 0.0%  | 0         | 0.0%  | 0         | 0.0%  |
| mmu-let-7a-1-5p | 13  | 48633608 | 48633629 | -      | edit     | 6        | 1321     | 0.4%  | 386       | 0.2%  | 798       | 0.7%  |
| mmu-let-7a-1-5p | 13  | 48633608 | 48633629 | -      | edit     | 7        | 0        | 0.0%  | 0         | 0.0%  | 0         | 0.0%  |
| mmu-let-7a-1-5p | 13  | 48633608 | 48633629 | -      | edit     | 8        | 233      | 0.1%  | 48        | 0.0%  | 27        | 0.0%  |
| mmu-let-7a-1-5p | 13  | 48633608 | 48633629 | -      | edit     | 9        | 1256     | 0.3%  | 186       | 0.1%  | 245       | 0.2%  |
| mmu-let-7a-1-5p | 13  | 48633608 | 48633629 | -      | edit     | 10       | 22       | 0.0%  | 23        | 0.0%  | 9         | 0.0%  |
| mmu-let-7a-1-5p | 13  | 48633608 | 48633629 | -      | edit     | 11       | 8        | 0.0%  | 0         | 0.0%  | 6         | 0.0%  |
| mmu-let-7a-1-5p | 13  | 48633608 | 48633629 | -      | edit     | 12       | 0        | 0.0%  | 0         | 0.0%  | 0         | 0.0%  |
| mmu-let-7a-1-5p | 13  | 48633608 | 48633629 | -      | edit     | 13       | 351      | 0.1%  | 48        | 0.0%  | 167       | 0.2%  |
| mmu-let-7a-1-5p | 13  | 48633608 | 48633629 | -      | edit     | 14       | 3        | 0.0%  | 0         | 0.0%  | 3         | 0.0%  |
| mmu-let-7a-1-5p | 13  | 48633608 | 48633629 | -      | edit     | 15       | 321      | 0.1%  | 168       | 0.1%  | 79        | 0.1%  |
| mmu-let-7a-1-5p | 13  | 48633608 | 48633629 | -      | edit     | 16       | 304      | 0.1%  | 110       | 0.1%  | 101       | 0.1%  |
| mmu-let-7a-1-5p | 13  | 48633608 | 48633629 | -      | edit     | 17       | 3999     | 1.1%  | 2929      | 1.5%  | 1159      | 1.1%  |
| mmu-let-7a-1-5p | 13  | 48633608 | 48633629 | -      | edit     | 18       | 51       | 0.0%  | 20        | 0.0%  | 10        | 0.0%  |
| mmu-let-7a-1-5p | 13  | 48633608 | 48633629 | -      | edit     | 19       | 1579     | 0.4%  | 1233      | 0.6%  | 471       | 0.4%  |
| mmu-let-7a-1-5p | 13  | 48633608 | 48633629 | -      | edit     | 20       | 48       | 0.0%  | 28        | 0.0%  | 14        | 0.0%  |
| mmu-let-7a-1-5p | 13  | 48633608 | 48633629 | -      | edit     | 21       | 556      | 0.2%  | 87        | 0.0%  | 258       | 0.2%  |
| mmu-let-7a-1-5p | 13  | 48633608 | 48633629 | -      | edit     | 22       | 185      | 0.1%  | 54        | 0.0%  | 55        | 0.1%  |
| EDITED          |     |          |          |        |          |          | 12012    | 3.3%  | 5364      | 2.7%  | 4159      | 3.8%  |
| CANONICAL       |     |          |          |        |          |          | 356489   | 96.7% | 193610    | 97.3% | 103860    | 96.2% |
| TOTAL           |     |          |          |        |          |          | 368501   |       | 198974    |       | 108019    |       |

| miRNA           | Chr | Start    | Stop     | Strand | Type     | Position | P7 reads | P7%   | P10 reads | P10%  | P14 reads | P14%  |
|-----------------|-----|----------|----------|--------|----------|----------|----------|-------|-----------|-------|-----------|-------|
| mmu-let-7a-2-5p | 9   | 41344815 | 41344836 | +      | 3' Edit  | 3'       | 92       | 0.0%  | 0         | 0.0%  | 30        | 0.0%  |
| mmu-let-7a-2-5p | 9   | 41344815 | 41344836 | +      | 3' Indel | 3'       | 20       | 0.0%  | 0         | 0.0%  | 7         | 0.0%  |
| mmu-let-7a-2-5p | 9   | 41344815 | 41344836 | +      | Indel    | 20       | 29       | 0.0%  | 0         | 0.0%  | 9         | 0.0%  |
| mmu-let-7a-2-5p | 9   | 41344815 | 41344836 | +      | Indel    | 22       | 122      | 0.0%  | 24        | 0.0%  | 50        | 0.0%  |
| mmu-let-7a-2-5p | 9   | 41344815 | 41344836 | +      | edit     | 1        | 0        | 0.0%  | 0         | 0.0%  | 0         | 0.0%  |
| mmu-let-7a-2-5p | 9   | 41344815 | 41344836 | +      | edit     | 2        | 0        | 0.0%  | 0         | 0.0%  | 0         | 0.0%  |
| mmu-let-7a-2-5p | 9   | 41344815 | 41344836 | +      | edit     | 3        | 0        | 0.0%  | 0         | 0.0%  | 0         | 0.0%  |
| mmu-let-7a-2-5p | 9   | 41344815 | 41344836 | +      | edit     | 4        | 62       | 0.0%  | 45        | 0.0%  | 19        | 0.0%  |
| mmu-let-7a-2-5p | 9   | 41344815 | 41344836 | +      | edit     | 5        | 6        | 0.0%  | 0         | 0.0%  | 0         | 0.0%  |
| mmu-let-7a-2-5p | 9   | 41344815 | 41344836 | +      | edit     | 6        | 1284     | 0.4%  | 380       | 0.2%  | 790       | 0.8%  |
| mmu-let-7a-2-5p | 9   | 41344815 | 41344836 | +      | edit     | 7        | 0        | 0.0%  | 0         | 0.0%  | 0         | 0.0%  |
| mmu-let-7a-2-5p | 9   | 41344815 | 41344836 | +      | edit     | 8        | 219      | 0.1%  | 50        | 0.0%  | 21        | 0.0%  |
| mmu-let-7a-2-5p | 9   | 41344815 | 41344836 | +      | edit     | 9        | 2520     | 0.7%  | 361       | 0.2%  | 536       | 0.5%  |
| mmu-let-7a-2-5p | 9   | 41344815 | 41344836 | +      | edit     | 10       | 35       | 0.0%  | 42        | 0.0%  | 14        | 0.0%  |
| mmu-let-7a-2-5p | 9   | 41344815 | 41344836 | +      | edit     | 11       | 12       | 0.0%  | 0         | 0.0%  | 9         | 0.0%  |
| mmu-let-7a-2-5p | 9   | 41344815 | 41344836 | +      | edit     | 12       | 1104     | 0.3%  | 215       | 0.1%  | 570       | 0.6%  |
| mmu-let-7a-2-5p | 9   | 41344815 | 41344836 | +      | edit     | 13       | 259      | 0.1%  | 38        | 0.0%  | 187       | 0.2%  |
| mmu-let-7a-2-5p | 9   | 41344815 | 41344836 | +      | edit     | 14       | 20       | 0.0%  | 9         | 0.0%  | 14        | 0.0%  |
| mmu-let-7a-2-5p | 9   | 41344815 | 41344836 | +      | edit     | 15       | 301      | 0.1%  | 159       | 0.1%  | 71        | 0.1%  |
| mmu-let-7a-2-5p | 9   | 41344815 | 41344836 | +      | edit     | 16       | 306      | 0.1%  | 114       | 0.1%  | 104       | 0.1%  |
| mmu-let-7a-2-5p | 9   | 41344815 | 41344836 | +      | edit     | 17       | 2256     | 0.7%  | 2332      | 1.2%  | 685       | 0.7%  |
| mmu-let-7a-2-5p | 9   | 41344815 | 41344836 | +      | edit     | 18       | 49       | 0.0%  | 19        | 0.0%  | 9         | 0.0%  |
| mmu-let-7a-2-5p | 9   | 41344815 | 41344836 | +      | edit     | 19       | 1388     | 0.4%  | 1135      | 0.6%  | 402       | 0.4%  |
| mmu-let-7a-2-5p | 9   | 41344815 | 41344836 | +      | edit     | 20       | 88       | 0.0%  | 31        | 0.0%  | 34        | 0.0%  |
| mmu-let-7a-2-5p | 9   | 41344815 | 41344836 | +      | edit     | 21       | 921      | 0.3%  | 112       | 0.1%  | 389       | 0.4%  |
| mmu-let-7a-2-5p | 9   | 41344815 | 41344836 | +      | edit     | 22       | 418      | 0.1%  | 80        | 0.0%  | 183       | 0.2%  |
| EDITED          |     |          |          |        |          |          | 11507    | 3.3%  | 5142      | 2.7%  | 4129      | 4.0%  |
| CANONICAL       |     |          |          |        |          |          | 333447   | 96.7% | 185125    | 97.3% | 98375     | 96.0% |
| TOTAL           |     |          |          |        |          |          | 344954   |       | 190267    |       | 102504    |       |

| miRNA         | Chr | Start    | Stop     | Strand | Type | Position | P7 reads | P7%   | P10 reads | P10%  | P14 reads | P14%  |
|---------------|-----|----------|----------|--------|------|----------|----------|-------|-----------|-------|-----------|-------|
| mmu-let-7b-3p | 15  | 85537809 | 85537830 | +      | edit | 1        | 0        | 0.0%  | 0         | 0.0%  | 0         | 0.0%  |
| mmu-let-7b-3p | 15  | 85537809 | 85537830 | +      | edit | 2        | 13       | 1.6%  | 9         | 3.3%  | 7         | 3.1%  |
| mmu-let-7b-3p | 15  | 85537809 | 85537830 | +      | edit | 3        | 0        | 0.0%  | 0         | 0.0%  | 0         | 0.0%  |
| mmu-let-7b-3p | 15  | 85537809 | 85537830 | +      | edit | 4        | 0        | 0.0%  | 0         | 0.0%  | 0         | 0.0%  |
| mmu-let-7b-3p | 15  | 85537809 | 85537830 | +      | edit | 5        | 0        | 0.0%  | 0         | 0.0%  | 0         | 0.0%  |
| mmu-let-7b-3p | 15  | 85537809 | 85537830 | +      | edit | 6        | 0        | 0.0%  | 0         | 0.0%  | 0         | 0.0%  |
| mmu-let-7b-3p | 15  | 85537809 | 85537830 | +      | edit | 7        | 0        | 0.0%  | 0         | 0.0%  | 0         | 0.0%  |
| mmu-let-7b-3p | 15  | 85537809 | 85537830 | +      | edit | 8        | 0        | 0.0%  | 0         | 0.0%  | 0         | 0.0%  |
| mmu-let-7b-3p | 15  | 85537809 | 85537830 | +      | edit | 9        | 0        | 0.0%  | 0         | 0.0%  | 0         | 0.0%  |
| mmu-let-7b-3p | 15  | 85537809 | 85537830 | +      | edit | 10       | 0        | 0.0%  | 0         | 0.0%  | 0         | 0.0%  |
| mmu-let-7b-3p | 15  | 85537809 | 85537830 | +      | edit | 11       | 0        | 0.0%  | 3         | 1.0%  | 0         | 0.0%  |
| mmu-let-7b-3p | 15  | 85537809 | 85537830 | +      | edit | 12       | 0        | 0.0%  | 0         | 0.0%  | 0         | 0.0%  |
| mmu-let-7b-3p | 15  | 85537809 | 85537830 | +      | edit | 13       | 0        | 0.0%  | 0         | 0.0%  | 0         | 0.0%  |
| mmu-let-7b-3p | 15  | 85537809 | 85537830 | +      | edit | 14       | 0        | 0.0%  | 0         | 0.0%  | 0         | 0.0%  |
| mmu-let-7b-3p | 15  | 85537809 | 85537830 | +      | edit | 15       | 211      | 26.3% | 52        | 18.2% | 35        | 14.9% |
| mmu-let-7b-3p | 15  | 85537809 | 85537830 | +      | edit | 16       | 0        | 0.0%  | 0         | 0.0%  | 0         | 0.0%  |
| mmu-let-7b-3p | 15  | 85537809 | 85537830 | +      | edit | 17       | 0        | 0.0%  | 0         | 0.0%  | 0         | 0.0%  |
| mmu-let-7b-3p | 15  | 85537809 | 85537830 | +      | edit | 18       | 0        | 0.0%  | 0         | 0.0%  | 0         | 0.0%  |
| mmu-let-7b-3p | 15  | 85537809 | 85537830 | +      | edit | 19       | 0        | 0.0%  | 0         | 0.0%  | 0         | 0.0%  |
| mmu-let-7b-3p | 15  | 85537809 | 85537830 | +      | edit | 20       | 0        | 0.0%  | 0         | 0.0%  | 0         | 0.0%  |
| mmu-let-7b-3p | 15  | 85537809 | 85537830 | +      | edit | 21       | 0        | 0.0%  | 0         | 0.0%  | 0         | 0.0%  |
| mmu-let-7b-3p | 15  | 85537809 | 85537830 | +      | edit | 22       | 0        | 0.0%  | 0         | 0.0%  | 0         | 0.0%  |
| EDITED        |     |          |          |        |      |          | 224      | 27.9% | 65        | 22.6% | 43        | 18.0% |
| CANONICAL     |     |          |          |        |      |          | 578      | 72.1% | 222       | 77.4% | 195       | 82.0% |
| TOTAL         |     |          |          |        |      |          | 802      |       | 287       |       | 238       |       |

| miRNA         | Chr | Start    | Stop     | Strand | Type     | Position | P7 reads | P7%   | P10 reads | P10%  | P14 reads | P14%  |
|---------------|-----|----------|----------|--------|----------|----------|----------|-------|-----------|-------|-----------|-------|
| mmu-let-7b-5p | 15  | 85537755 | 85537776 | +      | 3' Edit  | 3'       | 120      | 0.0%  | 0         | 0.0%  | 59        | 0.0%  |
| mmu-let-7b-5p | 15  | 85537755 | 85537776 | +      | 3' Indel | 3'       | 15       | 0.0%  | 0         | 0.0%  | 12        | 0.0%  |
| mmu-let-7b-5p | 15  | 85537755 | 85537776 | +      | Indel    | 17       | 28       | 0.0%  | 11        | 0.0%  | 5         | 0.0%  |
| mmu-let-7b-5p | 15  | 85537755 | 85537776 | +      | Indel    | 18       | 206      | 0.0%  | 104       | 0.0%  | 116       | 0.1%  |
| mmu-let-7b-5p | 15  | 85537755 | 85537776 | +      | Indel    | 19       | 0        | 0.0%  | 0         | 0.0%  | 0         | 0.0%  |
| mmu-let-7b-5p | 15  | 85537755 | 85537776 | +      | Indel    | 20       | 75       | 0.0%  | 40        | 0.0%  | 27        | 0.0%  |
| mmu-let-7b-5p | 15  | 85537755 | 85537776 | +      | Indel    | 21       | 15       | 0.0%  | 0         | 0.0%  | 0         | 0.0%  |
| mmu-let-7b-5p | 15  | 85537755 | 85537776 | +      | Indel    | 22       | 24       | 0.0%  | 9         | 0.0%  | 12        | 0.0%  |
| mmu-let-7b-5p | 15  | 85537755 | 85537776 | +      | edit     | 1        | 0        | 0.0%  | 0         | 0.0%  | 0         | 0.0%  |
| mmu-let-7b-5p | 15  | 85537755 | 85537776 | +      | edit     | 2        | 0        | 0.0%  | 0         | 0.0%  | 0         | 0.0%  |
| mmu-let-7b-5p | 15  | 85537755 | 85537776 | +      | edit     | 3        | 0        | 0.0%  | 0         | 0.0%  | 0         | 0.0%  |
| mmu-let-7b-5p | 15  | 85537755 | 85537776 | +      | edit     | 4        | 132      | 0.0%  | 138       | 0.0%  | 48        | 0.0%  |
| mmu-let-7b-5p | 15  | 85537755 | 85537776 | +      | edit     | 5        | 0        | 0.0%  | 0         | 0.0%  | 0         | 0.0%  |
| mmu-let-7b-5p | 15  | 85537755 | 85537776 | +      | edit     | 6        | 1551     | 0.3%  | 804       | 0.2%  | 919       | 0.5%  |
| mmu-let-7b-5p | 15  | 85537755 | 85537776 | +      | edit     | 7        | 0        | 0.0%  | 0         | 0.0%  | 0         | 0.0%  |
| mmu-let-7b-5p | 15  | 85537755 | 85537776 | +      | edit     | 8        | 413      | 0.1%  | 135       | 0.0%  | 52        | 0.0%  |
| mmu-let-7b-5p | 15  | 85537755 | 85537776 | +      | edit     | 9        | 0        | 0.0%  | 0         | 0.0%  | 0         | 0.0%  |
| mmu-let-7b-5p | 15  | 85537755 | 85537776 | +      | edit     | 10       | 18       | 0.0%  | 32        | 0.0%  | 0         | 0.0%  |
| mmu-let-7b-5p | 15  | 85537755 | 85537776 | +      | edit     | 11       | 0        | 0.0%  | 0         | 0.0%  | 0         | 0.0%  |
| mmu-let-7b-5p | 15  | 85537755 | 85537776 | +      | edit     | 12       | 33       | 0.0%  | 19        | 0.0%  | 6         | 0.0%  |
| mmu-let-7b-5p | 15  | 85537755 | 85537776 | +      | edit     | 13       | 12       | 0.0%  | 3         | 0.0%  | 11        | 0.0%  |
| mmu-let-7b-5p | 15  | 85537755 | 85537776 | +      | edit     | 14       | 0        | 0.0%  | 0         | 0.0%  | 0         | 0.0%  |
| mmu-let-7b-5p | 15  | 85537755 | 85537776 | +      | edit     | 15       | 552      | 0.1%  | 484       | 0.1%  | 145       | 0.1%  |
| mmu-let-7b-5p | 15  | 85537755 | 85537776 | +      | edit     | 16       | 0        | 0.0%  | 0         | 0.0%  | 0         | 0.0%  |
| mmu-let-7b-5p | 15  | 85537755 | 85537776 | +      | edit     | 17       | 399      | 0.1%  | 980       | 0.2%  | 134       | 0.1%  |
| mmu-let-7b-5p | 15  | 85537755 | 85537776 | +      | edit     | 18       | 4        | 0.0%  | 3         | 0.0%  | 0         | 0.0%  |
| mmu-let-7b-5p | 15  | 85537755 | 85537776 | +      | edit     | 19       | 4202     | 0.8%  | 2845      | 0.7%  | 1151      | 0.6%  |
| mmu-let-7b-5p | 15  | 85537755 | 85537776 | +      | edit     | 20       | 28       | 0.0%  | 17        | 0.0%  | 5         | 0.0%  |
| mmu-let-7b-5p | 15  | 85537755 | 85537776 | +      | edit     | 21       | 641      | 0.1%  | 306       | 0.1%  | 345       | 0.2%  |
| mmu-let-7b-5p | 15  | 85537755 | 85537776 | +      | edit     | 22       | 36       | 0.0%  | 9         | 0.0%  | 12        | 0.0%  |
| EDITED        |     |          |          |        |          |          | 8502     | 1.5%  | 5938      | 1.4%  | 3058      | 1.7%  |
| CANONICAL     |     |          |          |        |          |          | 549565   | 98.5% | 410791    | 98.6% | 176895    | 98.3% |
| TOTAL         |     |          |          |        |          |          | 558067   |       | 416729    |       | 179953    |       |

| miRNA           | Chr | Start    | Stop     | Strand | Type     | Position | P7 reads | P7%   | P10 reads | P10%  | P14 reads | P14%  |
|-----------------|-----|----------|----------|--------|----------|----------|----------|-------|-----------|-------|-----------|-------|
| mmu-let-7c-1-5p | 16  | 77599917 | 77599938 | +      | 3' Edit  | 3'       | 232      | 0.0%  | 0         | 0.0%  | 82        | 0.0%  |
| mmu-let-7c-1-5p | 16  | 77599917 | 77599938 | +      | 3' Indel | 3'       | 25       | 0.0%  | 0         | 0.0%  | 19        | 0.0%  |
| mmu-let-7c-1-5p | 16  | 77599917 | 77599938 | +      | Indel    | 18       | 110      | 0.0%  | 19        | 0.0%  | 50        | 0.0%  |
| mmu-let-7c-1-5p | 16  | 77599917 | 77599938 | +      | Indel    | 19       | 0        | 0.0%  | 0         | 0.0%  | 0         | 0.0%  |
| mmu-let-7c-1-5p | 16  | 77599917 | 77599938 | +      | Indel    | 20       | 196      | 0.0%  | 48        | 0.0%  | 91        | 0.0%  |
| mmu-let-7c-1-5p | 16  | 77599917 | 77599938 | +      | Indel    | 21       | 150      | 0.0%  | 49        | 0.0%  | 125       | 0.1%  |
| mmu-let-7c-1-5p | 16  | 77599917 | 77599938 | +      | Indel    | 22       | 701      | 0.1%  | 176       | 0.0%  | 397       | 0.2%  |
| mmu-let-7c-1-5p | 16  | 77599917 | 77599938 | +      | edit     | 1        | 0        | 0.0%  | 0         | 0.0%  | 0         | 0.0%  |
| mmu-let-7c-1-5p | 16  | 77599917 | 77599938 | +      | edit     | 2        | 0        | 0.0%  | 0         | 0.0%  | 0         | 0.0%  |
| mmu-let-7c-1-5p | 16  | 77599917 | 77599938 | +      | edit     | 3        | 0        | 0.0%  | 0         | 0.0%  | 0         | 0.0%  |
| mmu-let-7c-1-5p | 16  | 77599917 | 77599938 | +      | edit     | 4        | 182      | 0.0%  | 174       | 0.0%  | 77        | 0.0%  |
| mmu-let-7c-1-5p | 16  | 77599917 | 77599938 | +      | edit     | 5        | 0        | 0.0%  | 0         | 0.0%  | 0         | 0.0%  |
| mmu-let-7c-1-5p | 16  | 77599917 | 77599938 | +      | edit     | 6        | 2889     | 0.4%  | 1270      | 0.3%  | 2037      | 0.8%  |
| mmu-let-7c-1-5p | 16  | 77599917 | 77599938 | +      | edit     | 7        | 0        | 0.0%  | 0         | 0.0%  | 0         | 0.0%  |
| mmu-let-7c-1-5p | 16  | 77599917 | 77599938 | +      | edit     | 8        | 532      | 0.1%  | 141       | 0.0%  | 64        | 0.0%  |
| mmu-let-7c-1-5p | 16  | 77599917 | 77599938 | +      | edit     | 9        | 2163     | 0.3%  | 445       | 0.1%  | 314       | 0.1%  |
| mmu-let-7c-1-5p | 16  | 77599917 | 77599938 | +      | edit     | 10       | 22       | 0.0%  | 20        | 0.0%  | 5         | 0.0%  |
| mmu-let-7c-1-5p | 16  | 77599917 | 77599938 | +      | edit     | 11       | 7        | 0.0%  | 3         | 0.0%  | 9         | 0.0%  |
| mmu-let-7c-1-5p | 16  | 77599917 | 77599938 | +      | edit     | 12       | 268      | 0.0%  | 238       | 0.0%  | 72        | 0.0%  |
| mmu-let-7c-1-5p | 16  | 77599917 | 77599938 | +      | edit     | 13       | 449      | 0.1%  | 112       | 0.0%  | 344       | 0.1%  |
| mmu-let-7c-1-5p | 16  | 77599917 | 77599938 | +      | edit     | 14       | 3        | 0.0%  | 3         | 0.0%  | 7         | 0.0%  |
| mmu-let-7c-1-5p | 16  | 77599917 | 77599938 | +      | edit     | 15       | 653      | 0.1%  | 466       | 0.1%  | 163       | 0.1%  |
| mmu-let-7c-1-5p | 16  | 77599917 | 77599938 | +      | edit     | 16       | 36       | 0.0%  | 16        | 0.0%  | 10        | 0.0%  |
| mmu-let-7c-1-5p | 16  | 77599917 | 77599938 | +      | edit     | 17       | 222      | 0.0%  | 237       | 0.0%  | 105       | 0.0%  |
| mmu-let-7c-1-5p | 16  | 77599917 | 77599938 | +      | edit     | 18       | 3        | 0.0%  | 3         | 0.0%  | 0         | 0.0%  |
| mmu-let-7c-1-5p | 16  | 77599917 | 77599938 | +      | edit     | 19       | 1385     | 0.2%  | 1134      | 0.2%  | 398       | 0.2%  |
| mmu-let-7c-1-5p | 16  | 77599917 | 77599938 | +      | edit     | 20       | 38       | 0.0%  | 9         | 0.0%  | 25        | 0.0%  |
| mmu-let-7c-1-5p | 16  | 77599917 | 77599938 | +      | edit     | 21       | 1905     | 0.3%  | 386       | 0.1%  | 989       | 0.4%  |
| mmu-let-7c-1-5p | 16  | 77599917 | 77599938 | +      | edit     | 22       | 1101     | 0.2%  | 363       | 0.1%  | 798       | 0.3%  |
| EDITED          |     |          |          |        |          |          | 13270    | 1.9%  | 5311      | 1.1%  | 6180      | 2.5%  |
| CANONICAL       |     |          |          |        |          |          | 699775   | 98.1% | 492893    | 98.9% | 241358    | 97.5% |
| TOTAL           |     |          |          |        |          |          | 713045   |       | 498204    |       | 247538    |       |

| miRNA           | Chr | Start    | Stop     | Strand | Type     | Position | P7 reads | P7%   | P10 reads | P10%  | P14 reads | P14%  |
|-----------------|-----|----------|----------|--------|----------|----------|----------|-------|-----------|-------|-----------|-------|
| mmu-let-7c-2-5p | 15  | 85537046 | 85537067 | +      | 3' Edit  | 3'       | 5169     | 0.6%  | 0         | 0.0%  | 1791      | 0.6%  |
| mmu-let-7c-2-5p | 15  | 85537046 | 85537067 | +      | 3' Indel | 3'       | 4        | 0.0%  | 0         | 0.0%  | 3         | 0.0%  |
| mmu-let-7c-2-5p | 15  | 85537046 | 85537067 | +      | Indel    | 18       | 231      | 0.0%  | 51        | 0.0%  | 106       | 0.0%  |
| mmu-let-7c-2-5p | 15  | 85537046 | 85537067 | +      | Indel    | 19       | 0        | 0.0%  | 0         | 0.0%  | 0         | 0.0%  |
| mmu-let-7c-2-5p | 15  | 85537046 | 85537067 | +      | Indel    | 20       | 57       | 0.0%  | 20        | 0.0%  | 28        | 0.0%  |
| mmu-let-7c-2-5p | 15  | 85537046 | 85537067 | +      | Indel    | 21       | 132      | 0.0%  | 34        | 0.0%  | 87        | 0.0%  |
| mmu-let-7c-2-5p | 15  | 85537046 | 85537067 | +      | Indel    | 22       | 583      | 0.1%  | 256       | 0.0%  | 232       | 0.1%  |
| mmu-let-7c-2-5p | 15  | 85537046 | 85537067 | +      | edit     | 1        | 0        | 0.0%  | 0         | 0.0%  | 0         | 0.0%  |
| mmu-let-7c-2-5p | 15  | 85537046 | 85537067 | +      | edit     | 2        | 0        | 0.0%  | 0         | 0.0%  | 0         | 0.0%  |
| mmu-let-7c-2-5p | 15  | 85537046 | 85537067 | +      | edit     | 3        | 0        | 0.0%  | 0         | 0.0%  | 0         | 0.0%  |
| mmu-let-7c-2-5p | 15  | 85537046 | 85537067 | +      | edit     | 4        | 199      | 0.0%  | 181       | 0.0%  | 84        | 0.0%  |
| mmu-let-7c-2-5p | 15  | 85537046 | 85537067 | +      | edit     | 5        | 0        | 0.0%  | 0         | 0.0%  | 0         | 0.0%  |
| mmu-let-7c-2-5p | 15  | 85537046 | 85537067 | +      | edit     | 6        | 3254     | 0.4%  | 1321      | 0.2%  | 2317      | 0.8%  |
| mmu-let-7c-2-5p | 15  | 85537046 | 85537067 | +      | edit     | 7        | 0        | 0.0%  | 0         | 0.0%  | 0         | 0.0%  |
| mmu-let-7c-2-5p | 15  | 85537046 | 85537067 | +      | edit     | 8        | 595      | 0.1%  | 147       | 0.0%  | 67        | 0.0%  |
| mmu-let-7c-2-5p | 15  | 85537046 | 85537067 | +      | edit     | 9        | 5864     | 0.7%  | 968       | 0.2%  | 724       | 0.3%  |
| mmu-let-7c-2-5p | 15  | 85537046 | 85537067 | +      | edit     | 10       | 78       | 0.0%  | 65        | 0.0%  | 25        | 0.0%  |
| mmu-let-7c-2-5p | 15  | 85537046 | 85537067 | +      | edit     | 11       | 10       | 0.0%  | 5         | 0.0%  | 10        | 0.0%  |
| mmu-let-7c-2-5p | 15  | 85537046 | 85537067 | +      | edit     | 12       | 583      | 0.1%  | 317       | 0.1%  | 118       | 0.0%  |
| mmu-let-7c-2-5p | 15  | 85537046 | 85537067 | +      | edit     | 13       | 536      | 0.1%  | 133       | 0.0%  | 356       | 0.1%  |
| mmu-let-7c-2-5p | 15  | 85537046 | 85537067 | +      | edit     | 14       | 8        | 0.0%  | 0         | 0.0%  | 3         | 0.0%  |
| mmu-let-7c-2-5p | 15  | 85537046 | 85537067 | +      | edit     | 15       | 760      | 0.1%  | 526       | 0.1%  | 187       | 0.1%  |
| mmu-let-7c-2-5p | 15  | 85537046 | 85537067 | +      | edit     | 16       | 290      | 0.0%  | 98        | 0.0%  | 71        | 0.0%  |
| mmu-let-7c-2-5p | 15  | 85537046 | 85537067 | +      | edit     | 17       | 5645     | 0.7%  | 3913      | 0.7%  | 2076      | 0.7%  |
| mmu-let-7c-2-5p | 15  | 85537046 | 85537067 | +      | edit     | 18       | 0        | 0.0%  | 0         | 0.0%  | 0         | 0.0%  |
| mmu-let-7c-2-5p | 15  | 85537046 | 85537067 | +      | edit     | 19       | 2516     | 0.3%  | 1552      | 0.3%  | 769       | 0.3%  |
| mmu-let-7c-2-5p | 15  | 85537046 | 85537067 | +      | edit     | 20       | 35       | 0.0%  | 24        | 0.0%  | 13        | 0.0%  |
| mmu-let-7c-2-5p | 15  | 85537046 | 85537067 | +      | edit     | 21       | 2431     | 0.3%  | 584       | 0.1%  | 1242      | 0.4%  |
| mmu-let-7c-2-5p | 15  | 85537046 | 85537067 | +      | edit     | 22       | 957      | 0.1%  | 347       | 0.1%  | 534       | 0.2%  |
| mmu-let-7c-2-5p |     |          |          |        |          |          | 29935    | 3.6%  | 10540     | 2.0%  | 10843     | 3.8%  |
| mmu-let-7c-2-5p |     |          |          |        |          |          | 792556   | 96.4% | 527611    | 98.0% | 275775    | 96.2% |
| mmu-let-7c-2-5p |     |          |          |        |          |          | 822491   |       | 538151    |       | 286618    |       |

| miRNA         | Chr | Start    | Stop     | Strand | Type     | Position | P7 reads | P7%   | P10 reads | P10%  | P14 reads | P14%  |
|---------------|-----|----------|----------|--------|----------|----------|----------|-------|-----------|-------|-----------|-------|
| mmu-let-7d-5p | 13  | 48631447 | 48631468 | -      | 5' Edit  | 5'       | 219      | 0.2%  | 0         | 0.0%  | 92        | 0.3%  |
| mmu-let-7d-5p | 13  | 48631447 | 48631468 | -      | 5' Indel | 5'       | 12       | 0.0%  | 0         | 0.0%  | 3         | 0.0%  |
| mmu-let-7d-5p | 13  | 48631447 | 48631468 | -      | edit     | 1        | 0        | 0.0%  | 0         | 0.0%  | 0         | 0.0%  |
| mmu-let-7d-5p | 13  | 48631447 | 48631468 | -      | edit     | 2        | 0        | 0.0%  | 0         | 0.0%  | 0         | 0.0%  |
| mmu-let-7d-5p | 13  | 48631447 | 48631468 | -      | edit     | 3        | 0        | 0.0%  | 0         | 0.0%  | 0         | 0.0%  |
| mmu-let-7d-5p | 13  | 48631447 | 48631468 | -      | edit     | 4        | 30       | 0.0%  | 7         | 0.0%  | 3         | 0.0%  |
| mmu-let-7d-5p | 13  | 48631447 | 48631468 | -      | edit     | 5        | 0        | 0.0%  | 0         | 0.0%  | 0         | 0.0%  |
| mmu-let-7d-5p | 13  | 48631447 | 48631468 | -      | edit     | 6        | 26       | 0.0%  | 10        | 0.0%  | 19        | 0.1%  |
| mmu-let-7d-5p | 13  | 48631447 | 48631468 | -      | edit     | 7        | 0        | 0.0%  | 0         | 0.0%  | 0         | 0.0%  |
| mmu-let-7d-5p | 13  | 48631447 | 48631468 | -      | edit     | 8        | 97       | 0.1%  | 17        | 0.0%  | 7         | 0.0%  |
| mmu-let-7d-5p | 13  | 48631447 | 48631468 | -      | edit     | 9        | 49       | 0.0%  | 11        | 0.0%  | 6         | 0.0%  |
| mmu-let-7d-5p | 13  | 48631447 | 48631468 | -      | edit     | 10       | 3        | 0.0%  | 0         | 0.0%  | 0         | 0.0%  |
| mmu-let-7d-5p | 13  | 48631447 | 48631468 | -      | edit     | 11       | 0        | 0.0%  | 0         | 0.0%  | 0         | 0.0%  |
| mmu-let-7d-5p | 13  | 48631447 | 48631468 | -      | edit     | 12       | 8        | 0.0%  | 0         | 0.0%  | 0         | 0.0%  |
| mmu-let-7d-5p | 13  | 48631447 | 48631468 | -      | edit     | 13       | 101      | 0.1%  | 23        | 0.0%  | 62        | 0.2%  |
| mmu-let-7d-5p | 13  | 48631447 | 48631468 | -      | edit     | 14       | 0        | 0.0%  | 0         | 0.0%  | 0         | 0.0%  |
| mmu-let-7d-5p | 13  | 48631447 | 48631468 | -      | edit     | 15       | 155      | 0.1%  | 69        | 0.1%  | 23        | 0.1%  |
| mmu-let-7d-5p | 13  | 48631447 | 48631468 | -      | edit     | 16       | 164      | 0.1%  | 179       | 0.3%  | 91        | 0.2%  |
| mmu-let-7d-5p | 13  | 48631447 | 48631468 | -      | edit     | 17       | 933      | 0.7%  | 1893      | 3.0%  | 290       | 0.8%  |
| mmu-let-7d-5p | 13  | 48631447 | 48631468 | -      | edit     | 18       | 28       | 0.0%  | 8         | 0.0%  | 3         | 0.0%  |
| mmu-let-7d-5p | 13  | 48631447 | 48631468 | -      | edit     | 19       | 1326     | 1.1%  | 1289      | 2.0%  | 270       | 0.7%  |
| mmu-let-7d-5p | 13  | 48631447 | 48631468 | -      | edit     | 20       | 13       | 0.0%  | 0         | 0.0%  | 4         | 0.0%  |
| mmu-let-7d-5p | 13  | 48631447 | 48631468 | -      | edit     | 21       | 136      | 0.1%  | 22        | 0.0%  | 54        | 0.1%  |
| mmu-let-7d-5p | 13  | 48631447 | 48631468 | -      | edit     | 22       | 36       | 0.0%  | 6         | 0.0%  | 6         | 0.0%  |
| EDITED        |     |          |          |        |          |          | 3335     | 2.7%  | 3531      | 5.6%  | 932       | 2.5%  |
| CANONICAL     |     |          |          |        |          |          | 121532   | 97.3% | 60054     | 94.4% | 35740     | 97.5% |
| TOTAL         |     |          |          |        |          |          | 124867   |       | 63585     |       | 36672     |       |

| miRNA         | Chr | Start    | Stop     | Strand | Type     | Position | P7 reads | P7%   | P10 reads | P10%  | P14 reads | P14%  |
|---------------|-----|----------|----------|--------|----------|----------|----------|-------|-----------|-------|-----------|-------|
| mmu-let-7e-5p | 17  | 17967330 | 17967351 | +      | 3' Edit  | 3'       | 954      | 0.3%  | 0         | 0.0%  | 160       | 0.3%  |
| mmu-let-7e-5p | 17  | 17967330 | 17967351 | +      | 3' Indel | 3'       | 128      | 0.0%  | 0         | 0.0%  | 29        | 0.1%  |
| mmu-let-7e-5p | 17  | 17967330 | 17967351 | +      | Indel    | 19       | 6        | 0.0%  | 0         | 0.0%  | 0         | 0.0%  |
| mmu-let-7e-5p | 17  | 17967330 | 17967351 | +      | Indel    | 20       | 20       | 0.0%  | 0         | 0.0%  | 4         | 0.0%  |
| mmu-let-7e-5p | 17  | 17967330 | 17967351 | +      | Indel    | 21       | 4        | 0.0%  | 0         | 0.0%  | 0         | 0.0%  |
| mmu-let-7e-5p | 17  | 17967330 | 17967351 | +      | Indel    | 22       | 57       | 0.0%  | 5         | 0.0%  | 6         | 0.0%  |
| mmu-let-7e-5p | 17  | 17967330 | 17967351 | +      | edit     | 1        | 0        | 0.0%  | 0         | 0.0%  | 0         | 0.0%  |
| mmu-let-7e-5p | 17  | 17967330 | 17967351 | +      | edit     | 2        | 0        | 0.0%  | 0         | 0.0%  | 0         | 0.0%  |
| mmu-let-7e-5p | 17  | 17967330 | 17967351 | +      | edit     | 3        | 0        | 0.0%  | 0         | 0.0%  | 0         | 0.0%  |
| mmu-let-7e-5p | 17  | 17967330 | 17967351 | +      | edit     | 4        | 53       | 0.0%  | 20        | 0.0%  | 13        | 0.0%  |
| mmu-let-7e-5p | 17  | 17967330 | 17967351 | +      | edit     | 5        | 0        | 0.0%  | 0         | 0.0%  | 0         | 0.0%  |
| mmu-let-7e-5p | 17  | 17967330 | 17967351 | +      | edit     | 6        | 1392     | 0.4%  | 295       | 0.3%  | 497       | 1.0%  |
| mmu-let-7e-5p | 17  | 17967330 | 17967351 | +      | edit     | 7        | 0        | 0.0%  | 0         | 0.0%  | 0         | 0.0%  |
| mmu-let-7e-5p | 17  | 17967330 | 17967351 | +      | edit     | 8        | 173      | 0.1%  | 20        | 0.0%  | 5         | 0.0%  |
| mmu-let-7e-5p | 17  | 17967330 | 17967351 | +      | edit     | 9        | 16       | 0.0%  | 3         | 0.0%  | 10        | 0.0%  |
| mmu-let-7e-5p | 17  | 17967330 | 17967351 | +      | edit     | 10       | 0        | 0.0%  | 0         | 0.0%  | 0         | 0.0%  |
| mmu-let-7e-5p | 17  | 17967330 | 17967351 | +      | edit     | 11       | 0        | 0.0%  | 0         | 0.0%  | 0         | 0.0%  |
| mmu-let-7e-5p | 17  | 17967330 | 17967351 | +      | edit     | 12       | 10       | 0.0%  | 0         | 0.0%  | 0         | 0.0%  |
| mmu-let-7e-5p | 17  | 17967330 | 17967351 | +      | edit     | 13       | 3        | 0.0%  | 0         | 0.0%  | 0         | 0.0%  |
| mmu-let-7e-5p | 17  | 17967330 | 17967351 | +      | edit     | 14       | 0        | 0.0%  | 0         | 0.0%  | 0         | 0.0%  |
| mmu-let-7e-5p | 17  | 17967330 | 17967351 | +      | edit     | 15       | 177      | 0.1%  | 43        | 0.0%  | 19        | 0.0%  |
| mmu-let-7e-5p | 17  | 17967330 | 17967351 | +      | edit     | 16       | 16       | 0.0%  | 0         | 0.0%  | 0         | 0.0%  |
| mmu-let-7e-5p | 17  | 17967330 | 17967351 | +      | edit     | 17       | 25       | 0.0%  | 0         | 0.0%  | 0         | 0.0%  |
| mmu-let-7e-5p | 17  | 17967330 | 17967351 | +      | edit     | 18       | 0        | 0.0%  | 0         | 0.0%  | 0         | 0.0%  |
| mmu-let-7e-5p | 17  | 17967330 | 17967351 | +      | edit     | 19       | 7360     | 2.3%  | 2135      | 2.1%  | 1094      | 2.3%  |
| mmu-let-7e-5p | 17  | 17967330 | 17967351 | +      | edit     | 20       | 0        | 0.0%  | 0         | 0.0%  | 0         | 0.0%  |
| mmu-let-7e-5p | 17  | 17967330 | 17967351 | +      | edit     | 21       | 84       | 0.0%  | 10        | 0.0%  | 14        | 0.0%  |
| mmu-let-7e-5p | 17  | 17967330 | 17967351 | +      | edit     | 22       | 17       | 0.0%  | 7         | 0.0%  | 0         | 0.0%  |
| EDITED        |     |          |          |        |          |          | 10493    | 3.3%  | 2539      | 2.5%  | 1851      | 3.9%  |
| CANONICAL     |     |          |          |        |          |          | 308133   | 96.7% | 97522     | 97.5% | 45983     | 96.1% |
| TOTAL         |     |          |          |        |          |          | 318626   |       | 100061    |       | 47834     |       |



| miRNA           | Chr | Start    | Stop     | Strand | Type     | Position | P7 reads | P7%   | P10 reads | P10%  | P14 reads | P14%  |
|-----------------|-----|----------|----------|--------|----------|----------|----------|-------|-----------|-------|-----------|-------|
| mmu-let-7f-1-5p | 13  | 48633258 | 48633279 | -      | 5' Edit  | 5'       | 1028     | 0.2%  | 0         | 0.0%  | 400       | 0.2%  |
| mmu-let-7f-1-5p | 13  | 48633258 | 48633279 | -      | 5' Indel | 5'       | 33       | 0.0%  | 0         | 0.0%  | 19        | 0.0%  |
| mmu-let-7f-1-5p | 13  | 48633258 | 48633279 | -      | Indel    | 21       | 99       | 0.0%  | 22        | 0.0%  | 43        | 0.0%  |
| mmu-let-7f-1-5p | 13  | 48633258 | 48633279 | -      | Indel    | 22       | 0        | 0.0%  | 0         | 0.0%  | 5         | 0.0%  |
| mmu-let-7f-1-5p | 13  | 48633258 | 48633279 | -      | edit     | 1        | 0        | 0.0%  | 0         | 0.0%  | 0         | 0.0%  |
| mmu-let-7f-1-5p | 13  | 48633258 | 48633279 | -      | edit     | 2        | 0        | 0.0%  | 0         | 0.0%  | 0         | 0.0%  |
| mmu-let-7f-1-5p | 13  | 48633258 | 48633279 | -      | edit     | 3        | 0        | 0.0%  | 0         | 0.0%  | 0         | 0.0%  |
| mmu-let-7f-1-5p | 13  | 48633258 | 48633279 | -      | edit     | 4        | 136      | 0.0%  | 86        | 0.0%  | 49        | 0.0%  |
| mmu-let-7f-1-5p | 13  | 48633258 | 48633279 | -      | edit     | 5        | 0        | 0.0%  | 0         | 0.0%  | 0         | 0.0%  |
| mmu-let-7f-1-5p | 13  | 48633258 | 48633279 | -      | edit     | 6        | 2330     | 0.4%  | 737       | 0.2%  | 1673      | 0.7%  |
| mmu-let-7f-1-5p | 13  | 48633258 | 48633279 | -      | edit     | 7        | 0        | 0.0%  | 0         | 0.0%  | 0         | 0.0%  |
| mmu-let-7f-1-5p | 13  | 48633258 | 48633279 | -      | edit     | 8        | 401      | 0.1%  | 85        | 0.0%  | 53        | 0.0%  |
| mmu-let-7f-1-5p | 13  | 48633258 | 48633279 | -      | edit     | 9        | 11       | 0.0%  | 0         | 0.0%  | 0         | 0.0%  |
| mmu-let-7f-1-5p | 13  | 48633258 | 48633279 | -      | edit     | 10       | 0        | 0.0%  | 0         | 0.0%  | 0         | 0.0%  |
| mmu-let-7f-1-5p | 13  | 48633258 | 48633279 | -      | edit     | 11       | 0        | 0.0%  | 0         | 0.0%  | 0         | 0.0%  |
| mmu-let-7f-1-5p | 13  | 48633258 | 48633279 | -      | edit     | 12       | 4        | 0.0%  | 0         | 0.0%  | 0         | 0.0%  |
| mmu-let-7f-1-5p | 13  | 48633258 | 48633279 | -      | edit     | 13       | 0        | 0.0%  | 0         | 0.0%  | 6         | 0.0%  |
| mmu-let-7f-1-5p | 13  | 48633258 | 48633279 | -      | edit     | 14       | 0        | 0.0%  | 0         | 0.0%  | 0         | 0.0%  |
| mmu-let-7f-1-5p | 13  | 48633258 | 48633279 | -      | edit     | 15       | 552      | 0.1%  | 295       | 0.1%  | 152       | 0.1%  |
| mmu-let-7f-1-5p | 13  | 48633258 | 48633279 | -      | edit     | 16       | 571      | 0.1%  | 245       | 0.1%  | 178       | 0.1%  |
| mmu-let-7f-1-5p | 13  | 48633258 | 48633279 | -      | edit     | 17       | 838      | 0.1%  | 2061      | 0.6%  | 308       | 0.1%  |
| mmu-let-7f-1-5p | 13  | 48633258 | 48633279 | -      | edit     | 18       | 7        | 0.0%  | 0         | 0.0%  | 4         | 0.0%  |
| mmu-let-7f-1-5p | 13  | 48633258 | 48633279 | -      | edit     | 19       | 1885     | 0.3%  | 2227      | 0.6%  | 457       | 0.2%  |
| mmu-let-7f-1-5p | 13  | 48633258 | 48633279 | -      | edit     | 20       | 3        | 0.0%  | 0         | 0.0%  | 0         | 0.0%  |
| mmu-let-7f-1-5p | 13  | 48633258 | 48633279 | -      | edit     | 21       | 36       | 0.0%  | 25        | 0.0%  | 36        | 0.0%  |
| mmu-let-7f-1-5p | 13  | 48633258 | 48633279 | -      | edit     | 22       | 223      | 0.0%  | 417       | 0.1%  | 173       | 0.1%  |
| EDITED          |     |          |          |        |          |          | 8155     | 1.3%  | 6198      | 1.7%  | 3557      | 1.6%  |
| CANONICAL       |     |          |          |        |          |          | 607029   | 98.7% | 352131    | 98.3% | 225350    | 98.4% |
| TOTAL           |     |          |          |        |          |          | 615184   |       | 358329    |       | 228907    |       |

| miRNA           | Chr | Start     | Stop      | Strand | Type     | Position | P7 reads | P7%   | P10 reads | P10%  | P14 reads | P14%  |
|-----------------|-----|-----------|-----------|--------|----------|----------|----------|-------|-----------|-------|-----------|-------|
| mmu-let-7f-2-5p | X   | 148346896 | 148346917 | +      | 3' Edit  | 3'       | 2385     | 0.3%  | 0         | 0.0%  | 1243      | 0.4%  |
| mmu-let-7f-2-5p | X   | 148346896 | 148346917 | +      | 3' Indel | 3'       | 11       | 0.0%  | 0         | 0.0%  | 4         | 0.0%  |
| mmu-let-7f-2-5p | X   | 148346896 | 148346917 | +      | Indel    | 19       | 5        | 0.0%  | 0         | 0.0%  | 0         | 0.0%  |
| mmu-let-7f-2-5p | X   | 148346896 | 148346917 | +      | Indel    | 20       | 13       | 0.0%  | 0         | 0.0%  | 0         | 0.0%  |
| mmu-let-7f-2-5p | X   | 148346896 | 148346917 | +      | Indel    | 21       | 5        | 0.0%  | 0         | 0.0%  | 0         | 0.0%  |
| mmu-let-7f-2-5p | X   | 148346896 | 148346917 | +      | Indel    | 22       | 53       | 0.0%  | 13        | 0.0%  | 24        | 0.0%  |
| mmu-let-7f-2-5p | X   | 148346896 | 148346917 | +      | edit     | 1        | 0        | 0.0%  | 0         | 0.0%  | 0         | 0.0%  |
| mmu-let-7f-2-5p | X   | 148346896 | 148346917 | +      | edit     | 2        | 0        | 0.0%  | 0         | 0.0%  | 0         | 0.0%  |
| mmu-let-7f-2-5p | X   | 148346896 | 148346917 | +      | edit     | 3        | 0        | 0.0%  | 0         | 0.0%  | 0         | 0.0%  |
| mmu-let-7f-2-5p | X   | 148346896 | 148346917 | +      | edit     | 4        | 186      | 0.0%  | 107       | 0.0%  | 68        | 0.0%  |
| mmu-let-7f-2-5p | X   | 148346896 | 148346917 | +      | edit     | 5        | 0        | 0.0%  | 0         | 0.0%  | 0         | 0.0%  |
| mmu-let-7f-2-5p | X   | 148346896 | 148346917 | +      | edit     | 6        | 3586     | 0.5%  | 1008      | 0.2%  | 2562      | 0.8%  |
| mmu-let-7f-2-5p | X   | 148346896 | 148346917 | +      | edit     | 7        | 0        | 0.0%  | 0         | 0.0%  | 0         | 0.0%  |
| mmu-let-7f-2-5p | X   | 148346896 | 148346917 | +      | edit     | 8        | 498      | 0.1%  | 105       | 0.0%  | 67        | 0.0%  |
| mmu-let-7f-2-5p | X   | 148346896 | 148346917 | +      | edit     | 9        | 0        | 0.0%  | 0         | 0.0%  | 0         | 0.0%  |
| mmu-let-7f-2-5p | X   | 148346896 | 148346917 | +      | edit     | 10       | 117      | 0.0%  | 126       | 0.0%  | 53        | 0.0%  |
| mmu-let-7f-2-5p | X   | 148346896 | 148346917 | +      | edit     | 11       | 0        | 0.0%  | 0         | 0.0%  | 0         | 0.0%  |
| mmu-let-7f-2-5p | X   | 148346896 | 148346917 | +      | edit     | 12       | 286      | 0.0%  | 168       | 0.0%  | 77        | 0.0%  |
| mmu-let-7f-2-5p | X   | 148346896 | 148346917 | +      | edit     | 13       | 6        | 0.0%  | 0         | 0.0%  | 9         | 0.0%  |
| mmu-let-7f-2-5p | X   | 148346896 | 148346917 | +      | edit     | 14       | 3        | 0.0%  | 0         | 0.0%  | 0         | 0.0%  |
| mmu-let-7f-2-5p | X   | 148346896 | 148346917 | +      | edit     | 15       | 879      | 0.1%  | 427       | 0.1%  | 279       | 0.1%  |
| mmu-let-7f-2-5p | X   | 148346896 | 148346917 | +      | edit     | 16       | 906      | 0.1%  | 370       | 0.1%  | 261       | 0.1%  |
| mmu-let-7f-2-5p | X   | 148346896 | 148346917 | +      | edit     | 17       | 1558     | 0.2%  | 3028      | 0.7%  | 558       | 0.2%  |
| mmu-let-7f-2-5p | X   | 148346896 | 148346917 | +      | edit     | 18       | 0        | 0.0%  | 0         | 0.0%  | 0         | 0.0%  |
| mmu-let-7f-2-5p | X   | 148346896 | 148346917 | +      | edit     | 19       | 2939     | 0.4%  | 3560      | 0.8%  | 832       | 0.3%  |
| mmu-let-7f-2-5p | X   | 148346896 | 148346917 | +      | edit     | 20       | 31       | 0.0%  | 4         | 0.0%  | 19        | 0.0%  |
| mmu-let-7f-2-5p | X   | 148346896 | 148346917 | +      | edit     | 21       | 897      | 0.1%  | 119       | 0.0%  | 489       | 0.2%  |
| mmu-let-7f-2-5p | X   | 148346896 | 148346917 | +      | edit     | 22       | 290      | 0.0%  | 73        | 0.0%  | 109       | 0.0%  |
| EDITED          |     |           |           |        |          |          | 14653    | 1.8%  | 9107      | 2.0%  | 6650      | 2.2%  |
| CANONICAL       |     |           |           |        |          |          | 779320   | 98.2% | 437857    | 98.0% | 301811    | 97.8% |
| TOTAL           |     |           |           |        |          |          | 793973   |       | 446964    |       | 308461    |       |

| miRNA         | Chr | Start     | Stop      | Strand | Type  | Position | P7 reads | P7%   | P10 reads | P10%  | P14 reads | P14%  |
|---------------|-----|-----------|-----------|--------|-------|----------|----------|-------|-----------|-------|-----------|-------|
| mmu-let-7g-5p | 9   | 106081177 | 106081198 | +      | Indel | 19       | 7        | 0.0%  | 3         | 0.0%  | 5         | 0.0%  |
| mmu-let-7g-5p | 9   | 106081177 | 106081198 | +      | Indel | 20       | 22       | 0.0%  | 5         | 0.0%  | 17        | 0.0%  |
| mmu-let-7g-5p | 9   | 106081177 | 106081198 | +      | edit  | 1        | 0        | 0.0%  | 0         | 0.0%  | 0         | 0.0%  |
| mmu-let-7g-5p | 9   | 106081177 | 106081198 | +      | edit  | 2        | 0        | 0.0%  | 0         | 0.0%  | 0         | 0.0%  |
| mmu-let-7g-5p | 9   | 106081177 | 106081198 | +      | edit  | 3        | 0        | 0.0%  | 0         | 0.0%  | 0         | 0.0%  |
| mmu-let-7g-5p | 9   | 106081177 | 106081198 | +      | edit  | 4        | 12       | 0.0%  | 10        | 0.0%  | 4         | 0.0%  |
| mmu-let-7g-5p | 9   | 106081177 | 106081198 | +      | edit  | 5        | 0        | 0.0%  | 0         | 0.0%  | 0         | 0.0%  |
| mmu-let-7g-5p | 9   | 106081177 | 106081198 | +      | edit  | 6        | 432      | 0.4%  | 176       | 0.2%  | 358       | 0.7%  |
| mmu-let-7g-5p | 9   | 106081177 | 106081198 | +      | edit  | 7        | 0        | 0.0%  | 0         | 0.0%  | 0         | 0.0%  |
| mmu-let-7g-5p | 9   | 106081177 | 106081198 | +      | edit  | 8        | 98       | 0.1%  | 36        | 0.0%  | 14        | 0.0%  |
| mmu-let-7g-5p | 9   | 106081177 | 106081198 | +      | edit  | 9        | 0        | 0.0%  | 0         | 0.0%  | 0         | 0.0%  |
| mmu-let-7g-5p | 9   | 106081177 | 106081198 | +      | edit  | 10       | 0        | 0.0%  | 0         | 0.0%  | 0         | 0.0%  |
| mmu-let-7g-5p | 9   | 106081177 | 106081198 | +      | edit  | 11       | 0        | 0.0%  | 0         | 0.0%  | 0         | 0.0%  |
| mmu-let-7g-5p | 9   | 106081177 | 106081198 | +      | edit  | 12       | 186      | 0.2%  | 53        | 0.1%  | 92        | 0.2%  |
| mmu-let-7g-5p | 9   | 106081177 | 106081198 | +      | edit  | 13       | 0        | 0.0%  | 0         | 0.0%  | 0         | 0.0%  |
| mmu-let-7g-5p | 9   | 106081177 | 106081198 | +      | edit  | 14       | 0        | 0.0%  | 0         | 0.0%  | 0         | 0.0%  |
| mmu-let-7g-5p | 9   | 106081177 | 106081198 | +      | edit  | 15       | 291      | 0.3%  | 309       | 0.3%  | 100       | 0.2%  |
| mmu-let-7g-5p | 9   | 106081177 | 106081198 | +      | edit  | 16       | 0        | 0.0%  | 0         | 0.0%  | 0         | 0.0%  |
| mmu-let-7g-5p | 9   | 106081177 | 106081198 | +      | edit  | 17       | 102      | 0.1%  | 129       | 0.1%  | 41        | 0.1%  |
| mmu-let-7g-5p | 9   | 106081177 | 106081198 | +      | edit  | 18       | 1498     | 1.3%  | 991       | 1.1%  | 393       | 0.8%  |
| mmu-let-7g-5p | 9   | 106081177 | 106081198 | +      | edit  | 19       | 562      | 0.5%  | 1581      | 1.7%  | 229       | 0.5%  |
| mmu-let-7g-5p | 9   | 106081177 | 106081198 | +      | edit  | 20       | 0        | 0.0%  | 0         | 0.0%  | 0         | 0.0%  |
| mmu-let-7g-5p | 9   | 106081177 | 106081198 | +      | edit  | 21       | 7        | 0.0%  | 6         | 0.0%  | 7         | 0.0%  |
| mmu-let-7g-5p | 9   | 106081177 | 106081198 | +      | edit  | 22       | 0        | 0.0%  | 0         | 0.0%  | 0         | 0.0%  |
| EDITED        |     |           |           |        |       |          | 3217     | 2.8%  | 3298      | 3.6%  | 1260      | 2.5%  |
| CANONICAL     |     |           |           |        |       |          | 110414   | 97.2% | 87323     | 96.4% | 49598     | 97.5% |
| TOTAL         |     |           |           |        |       |          | 113631   |       | 90621     |       | 50858     |       |

| miRNA         | Chr | Start     | Stop      | Strand | Type     | Position | P7 reads | P7%   | P10 reads | P10%  | P14 reads | P14%  |
|---------------|-----|-----------|-----------|--------|----------|----------|----------|-------|-----------|-------|-----------|-------|
| mmu-let-7i-5p | 10  | 122422754 | 122422775 | -      | 5' Indel | 5'       | 0        | 0.0%  | 0         | 0.0%  | 3         | 0.0%  |
| mmu-let-7i-5p | 10  | 122422754 | 122422775 | -      | edit     | 1        | 0        | 0.0%  | 0         | 0.0%  | 0         | 0.0%  |
| mmu-let-7i-5p | 10  | 122422754 | 122422775 | -      | edit     | 2        | 0        | 0.0%  | 0         | 0.0%  | 0         | 0.0%  |
| mmu-let-7i-5p | 10  | 122422754 | 122422775 | -      | edit     | 3        | 0        | 0.0%  | 0         | 0.0%  | 0         | 0.0%  |
| mmu-let-7i-5p | 10  | 122422754 | 122422775 | -      | edit     | 4        | 4        | 0.0%  | 3         | 0.0%  | 0         | 0.0%  |
| mmu-let-7i-5p | 10  | 122422754 | 122422775 | -      | edit     | 5        | 0        | 0.0%  | 0         | 0.0%  | 0         | 0.0%  |
| mmu-let-7i-5p | 10  | 122422754 | 122422775 | -      | edit     | 6        | 0        | 0.0%  | 0         | 0.0%  | 0         | 0.0%  |
| mmu-let-7i-5p | 10  | 122422754 | 122422775 | -      | edit     | 7        | 0        | 0.0%  | 0         | 0.0%  | 0         | 0.0%  |
| mmu-let-7i-5p | 10  | 122422754 | 122422775 | -      | edit     | 8        | 0        | 0.0%  | 0         | 0.0%  | 0         | 0.0%  |
| mmu-let-7i-5p | 10  | 122422754 | 122422775 | -      | edit     | 9        | 0        | 0.0%  | 0         | 0.0%  | 0         | 0.0%  |
| mmu-let-7i-5p | 10  | 122422754 | 122422775 | -      | edit     | 10       | 0        | 0.0%  | 0         | 0.0%  | 0         | 0.0%  |
| mmu-let-7i-5p | 10  | 122422754 | 122422775 | -      | edit     | 11       | 0        | 0.0%  | 0         | 0.0%  | 0         | 0.0%  |
| mmu-let-7i-5p | 10  | 122422754 | 122422775 | -      | edit     | 12       | 0        | 0.0%  | 0         | 0.0%  | 0         | 0.0%  |
| mmu-let-7i-5p | 10  | 122422754 | 122422775 | -      | edit     | 13       | 0        | 0.0%  | 0         | 0.0%  | 0         | 0.0%  |
| mmu-let-7i-5p | 10  | 122422754 | 122422775 | -      | edit     | 14       | 0        | 0.0%  | 0         | 0.0%  | 0         | 0.0%  |
| mmu-let-7i-5p | 10  | 122422754 | 122422775 | -      | edit     | 15       | 84       | 0.1%  | 103       | 0.2%  | 27        | 0.1%  |
| mmu-let-7i-5p | 10  | 122422754 | 122422775 | -      | edit     | 16       | 46       | 0.1%  | 39        | 0.1%  | 23        | 0.1%  |
| mmu-let-7i-5p | 10  | 122422754 | 122422775 | -      | edit     | 17       | 107      | 0.2%  | 112       | 0.2%  | 34        | 0.1%  |
| mmu-let-7i-5p | 10  | 122422754 | 122422775 | -      | edit     | 18       | 0        | 0.0%  | 4         | 0.0%  | 0         | 0.0%  |
| mmu-let-7i-5p | 10  | 122422754 | 122422775 | -      | edit     | 19       | 107      | 0.2%  | 145       | 0.3%  | 34        | 0.1%  |
| mmu-let-7i-5p | 10  | 122422754 | 122422775 | -      | edit     | 20       | 0        | 0.0%  | 0         | 0.0%  | 0         | 0.0%  |
| mmu-let-7i-5p | 10  | 122422754 | 122422775 | -      | edit     | 21       | 0        | 0.0%  | 0         | 0.0%  | 0         | 0.0%  |
| mmu-let-7i-5p | 10  | 122422754 | 122422775 | -      | edit     | 22       | 0        | 0.0%  | 0         | 0.0%  | 0         | 0.0%  |
| EDITED        |     |           |           |        |          |          | 347      | 0.6%  | 406       | 0.9%  | 120       | 0.5%  |
| CANONICAL     |     |           |           |        |          |          | 55670    | 99.4% | 46889     | 99.1% | 25130     | 99.5% |
| TOTAL         |     |           |           |        |          |          | 56017    |       | 47295     |       | 25250     |       |

| miRNA          | Chr | Start    | Stop     | Strand | Type | Position | P7 reads | P7%   | P10 reads | P10%  | P14 reads | P14%  |
|----------------|-----|----------|----------|--------|------|----------|----------|-------|-----------|-------|-----------|-------|
| mmu-mir-1-2-5p | 18  | 10785483 | 10785504 | -      | edit | 1        | 0        | 0.0%  | 0         | 0.0%  | 0         | 0.0%  |
| mmu-mir-1-2-5p | 18  | 10785483 | 10785504 | -      | edit | 2        | 0        | 0.0%  | 0         | 0.0%  | 0         | 0.0%  |
| mmu-mir-1-2-5p | 18  | 10785483 | 10785504 | -      | edit | 3        | 0        | 0.0%  | 0         | 0.0%  | 0         | 0.0%  |
| mmu-mir-1-2-5p | 18  | 10785483 | 10785504 | -      | edit | 4        | 8        | 0.1%  | 8         | 0.1%  | 4         | 0.1%  |
| mmu-mir-1-2-5p | 18  | 10785483 | 10785504 | -      | edit | 5        | 0        | 0.0%  | 0         | 0.0%  | 0         | 0.0%  |
| mmu-mir-1-2-5p | 18  | 10785483 | 10785504 | -      | edit | 6        | 0        | 0.0%  | 0         | 0.0%  | 0         | 0.0%  |
| mmu-mir-1-2-5p | 18  | 10785483 | 10785504 | -      | edit | 7        | 0        | 0.0%  | 0         | 0.0%  | 0         | 0.0%  |
| mmu-mir-1-2-5p | 18  | 10785483 | 10785504 | -      | edit | 8        | 52       | 0.4%  | 11        | 0.1%  | 30        | 0.4%  |
| mmu-mir-1-2-5p | 18  | 10785483 | 10785504 | -      | edit | 9        | 0        | 0.0%  | 0         | 0.0%  | 0         | 0.0%  |
| mmu-mir-1-2-5p | 18  | 10785483 | 10785504 | -      | edit | 10       | 0        | 0.0%  | 0         | 0.0%  | 0         | 0.0%  |
| mmu-mir-1-2-5p | 18  | 10785483 | 10785504 | -      | edit | 11       | 0        | 0.0%  | 0         | 0.0%  | 0         | 0.0%  |
| mmu-mir-1-2-5p | 18  | 10785483 | 10785504 | -      | edit | 12       | 0        | 0.0%  | 0         | 0.0%  | 0         | 0.0%  |
| mmu-mir-1-2-5p | 18  | 10785483 | 10785504 | -      | edit | 13       | 0        | 0.0%  | 0         | 0.0%  | 0         | 0.0%  |
| mmu-mir-1-2-5p | 18  | 10785483 | 10785504 | -      | edit | 14       | 0        | 0.0%  | 0         | 0.0%  | 0         | 0.0%  |
| mmu-mir-1-2-5p | 18  | 10785483 | 10785504 | -      | edit | 15       | 5        | 0.0%  | 0         | 0.0%  | 0         | 0.0%  |
| mmu-mir-1-2-5p | 18  | 10785483 | 10785504 | -      | edit | 16       | 6        | 0.0%  | 0         | 0.0%  | 4         | 0.1%  |
| mmu-mir-1-2-5p | 18  | 10785483 | 10785504 | -      | edit | 17       | 16       | 0.1%  | 60        | 0.6%  | 6         | 0.1%  |
| mmu-mir-1-2-5p | 18  | 10785483 | 10785504 | -      | edit | 18       | 0        | 0.0%  | 0         | 0.0%  | 0         | 0.0%  |
| mmu-mir-1-2-5p | 18  | 10785483 | 10785504 | -      | edit | 19       | 25       | 0.2%  | 11        | 0.1%  | 9         | 0.1%  |
| mmu-mir-1-2-5p | 18  | 10785483 | 10785504 | -      | edit | 20       | 0        | 0.0%  | 0         | 0.0%  | 0         | 0.0%  |
| mmu-mir-1-2-5p | 18  | 10785483 | 10785504 | -      | edit | 21       | 0        | 0.0%  | 0         | 0.0%  | 0         | 0.0%  |
| mmu-mir-1-2-5p | 18  | 10785483 | 10785504 | -      | edit | 22       | 0        | 0.0%  | 0         | 0.0%  | 0         | 0.0%  |
| EDITED         |     |          |          |        |      |          | 112      | 0.8%  | 90        | 0.9%  | 53        | 0.7%  |
| CANONICAL      |     |          |          |        |      |          | 14204    | 99.2% | 9553      | 99.1% | 7240      | 99.3% |
| TOTAL          |     |          |          |        |      |          | 14316    |       | 9643      |       | 7293      |       |



| miRNA          | Chr | Start    | Stop     | Strand | Type | Position | P7 reads | P7%   | P10 reads | P10%  | P14 reads | P14%   |
|----------------|-----|----------|----------|--------|------|----------|----------|-------|-----------|-------|-----------|--------|
| mmu-mir-10a-5p | 11  | 96178500 | 96178522 | +      | edit | 1        | 0        | 0.0%  | 0         | 0.0%  | 0         | 0.0%   |
| mmu-mir-10a-5p | 11  | 96178500 | 96178522 | +      | edit | 2        | 0        | 0.0%  | 0         | 0.0%  | 0         | 0.0%   |
| mmu-mir-10a-5p | 11  | 96178500 | 96178522 | +      | edit | 3        | 0        | 0.0%  | 0         | 0.0%  | 0         | 0.0%   |
| mmu-mir-10a-5p | 11  | 96178500 | 96178522 | +      | edit | 4        | 6        | 0.1%  | 0         | 0.0%  | 0         | 0.0%   |
| mmu-mir-10a-5p | 11  | 96178500 | 96178522 | +      | edit | 5        | 0        | 0.0%  | 0         | 0.0%  | 0         | 0.0%   |
| mmu-mir-10a-5p | 11  | 96178500 | 96178522 | +      | edit | 6        | 4        | 0.1%  | 0         | 0.0%  | 0         | 0.0%   |
| mmu-mir-10a-5p | 11  | 96178500 | 96178522 | +      | edit | 7        | 0        | 0.0%  | 0         | 0.0%  | 0         | 0.0%   |
| mmu-mir-10a-5p | 11  | 96178500 | 96178522 | +      | edit | 8        | 9        | 0.2%  | 0         | 0.0%  | 0         | 0.0%   |
| mmu-mir-10a-5p | 11  | 96178500 | 96178522 | +      | edit | 9        | 0        | 0.0%  | 0         | 0.0%  | 0         | 0.0%   |
| mmu-mir-10a-5p | 11  | 96178500 | 96178522 | +      | edit | 10       | 0        | 0.0%  | 0         | 0.0%  | 0         | 0.0%   |
| mmu-mir-10a-5p | 11  | 96178500 | 96178522 | +      | edit | 11       | 0        | 0.0%  | 0         | 0.0%  | 0         | 0.0%   |
| mmu-mir-10a-5p | 11  | 96178500 | 96178522 | +      | edit | 12       | 4        | 0.1%  | 0         | 0.0%  | 0         | 0.0%   |
| mmu-mir-10a-5p | 11  | 96178500 | 96178522 | +      | edit | 13       | 4        | 0.1%  | 0         | 0.0%  | 0         | 0.0%   |
| mmu-mir-10a-5p | 11  | 96178500 | 96178522 | +      | edit | 14       | 0        | 0.0%  | 0         | 0.0%  | 0         | 0.0%   |
| mmu-mir-10a-5p | 11  | 96178500 | 96178522 | +      | edit | 15       | 0        | 0.0%  | 0         | 0.0%  | 0         | 0.0%   |
| mmu-mir-10a-5p | 11  | 96178500 | 96178522 | +      | edit | 16       | 0        | 0.0%  | 4         | 0.5%  | 0         | 0.0%   |
| mmu-mir-10a-5p | 11  | 96178500 | 96178522 | +      | edit | 17       | 0        | 0.0%  | 0         | 0.0%  | 0         | 0.0%   |
| mmu-mir-10a-5p | 11  | 96178500 | 96178522 | +      | edit | 18       | 0        | 0.0%  | 0         | 0.0%  | 0         | 0.0%   |
| mmu-mir-10a-5p | 11  | 96178500 | 96178522 | +      | edit | 19       | 7        | 0.2%  | 6         | 0.7%  | 0         | 0.0%   |
| mmu-mir-10a-5p | 11  | 96178500 | 96178522 | +      | edit | 20       | 0        | 0.0%  | 0         | 0.0%  | 0         | 0.0%   |
| mmu-mir-10a-5p | 11  | 96178500 | 96178522 | +      | edit | 21       | 4        | 0.1%  | 0         | 0.0%  | 0         | 0.0%   |
| mmu-mir-10a-5p | 11  | 96178500 | 96178522 | +      | edit | 22       | 0        | 0.0%  | 0         | 0.0%  | 0         | 0.0%   |
| EDITED         |     |          |          |        |      |          | 38       | 0.8%  | 10        | 1.2%  | 0         | 0.0%   |
| CANONICAL      |     |          |          |        |      |          | 4592     | 99.2% | 821       | 98.8% | 803       | 100.0% |
| TOTAL          |     |          |          |        |      |          | 4630     |       | 831       |       | 803       |        |

| miRNA          | Chr | Start    | Stop     | Strand | Type    | Position | P7 reads | P7%   | P10 reads | P10%  | P14 reads | P14%  |
|----------------|-----|----------|----------|--------|---------|----------|----------|-------|-----------|-------|-----------|-------|
| mmu-mir-10b-5p | 2   | 74564131 | 74564153 | +      | 3' Edit | 3'       | 7        | 0.2%  | 0         | 0.0%  | 3         | 0.4%  |
| mmu-mir-10b-5p | 2   | 74564131 | 74564153 | +      | Indel   | 22       | 5        | 0.2%  | 8         | 0.6%  | 0         | 0.0%  |
| mmu-mir-10b-5p | 2   | 74564131 | 74564153 | +      | edit    | 1        | 0        | 0.0%  | 0         | 0.0%  | 0         | 0.0%  |
| mmu-mir-10b-5p | 2   | 74564131 | 74564153 | +      | edit    | 2        | 0        | 0.0%  | 0         | 0.0%  | 0         | 0.0%  |
| mmu-mir-10b-5p | 2   | 74564131 | 74564153 | +      | edit    | 3        | 0        | 0.0%  | 0         | 0.0%  | 0         | 0.0%  |
| mmu-mir-10b-5p | 2   | 74564131 | 74564153 | +      | edit    | 4        | 3        | 0.1%  | 0         | 0.0%  | 0         | 0.0%  |
| mmu-mir-10b-5p | 2   | 74564131 | 74564153 | +      | edit    | 5        | 0        | 0.0%  | 0         | 0.0%  | 0         | 0.0%  |
| mmu-mir-10b-5p | 2   | 74564131 | 74564153 | +      | edit    | 6        | 0        | 0.0%  | 0         | 0.0%  | 0         | 0.0%  |
| mmu-mir-10b-5p | 2   | 74564131 | 74564153 | +      | edit    | 7        | 0        | 0.0%  | 0         | 0.0%  | 0         | 0.0%  |
| mmu-mir-10b-5p | 2   | 74564131 | 74564153 | +      | edit    | 8        | 16       | 0.5%  | 0         | 0.0%  | 0         | 0.0%  |
| mmu-mir-10b-5p | 2   | 74564131 | 74564153 | +      | edit    | 9        | 0        | 0.0%  | 0         | 0.0%  | 0         | 0.0%  |
| mmu-mir-10b-5p | 2   | 74564131 | 74564153 | +      | edit    | 10       | 0        | 0.0%  | 0         | 0.0%  | 0         | 0.0%  |
| mmu-mir-10b-5p | 2   | 74564131 | 74564153 | +      | edit    | 11       | 0        | 0.0%  | 0         | 0.0%  | 0         | 0.0%  |
| mmu-mir-10b-5p | 2   | 74564131 | 74564153 | +      | edit    | 12       | 0        | 0.0%  | 0         | 0.0%  | 3         | 0.4%  |
| mmu-mir-10b-5p | 2   | 74564131 | 74564153 | +      | edit    | 13       | 0        | 0.0%  | 0         | 0.0%  | 0         | 0.0%  |
| mmu-mir-10b-5p | 2   | 74564131 | 74564153 | +      | edit    | 14       | 0        | 0.0%  | 0         | 0.0%  | 0         | 0.0%  |
| mmu-mir-10b-5p | 2   | 74564131 | 74564153 | +      | edit    | 15       | 0        | 0.0%  | 0         | 0.0%  | 0         | 0.0%  |
| mmu-mir-10b-5p | 2   | 74564131 | 74564153 | +      | edit    | 16       | 3        | 0.1%  | 10        | 0.8%  | 0         | 0.0%  |
| mmu-mir-10b-5p | 2   | 74564131 | 74564153 | +      | edit    | 17       | 0        | 0.0%  | 0         | 0.0%  | 0         | 0.0%  |
| mmu-mir-10b-5p | 2   | 74564131 | 74564153 | +      | edit    | 18       | 0        | 0.0%  | 0         | 0.0%  | 0         | 0.0%  |
| mmu-mir-10b-5p | 2   | 74564131 | 74564153 | +      | edit    | 19       | 11       | 0.3%  | 3         | 0.2%  | 0         | 0.0%  |
| mmu-mir-10b-5p | 2   | 74564131 | 74564153 | +      | edit    | 20       | 0        | 0.0%  | 0         | 0.0%  | 0         | 0.0%  |
| mmu-mir-10b-5p | 2   | 74564131 | 74564153 | +      | edit    | 21       | 0        | 0.0%  | 0         | 0.0%  | 0         | 0.0%  |
| mmu-mir-10b-5p | 2   | 74564131 | 74564153 | +      | edit    | 22       | 0        | 0.0%  | 0         | 0.0%  | 0         | 0.0%  |
| mmu-mir-10b-5p | 2   | 74564131 | 74564153 | +      | edit    | 23       | 0        | 0.0%  | 0         | 0.0%  | 3         | 0.4%  |
| EDITED         |     |          |          |        |         |          | 45       | 1.4%  | 21        | 1.6%  | 9         | 1.3%  |
| CANONICAL      |     |          |          |        |         |          | 3215     | 98.6% | 1301      | 98.4% | 689       | 98.7% |
| TOTAL          |     |          |          |        |         |          | 3260     |       | 1322      |       | 698       |       |



| miRNA           | Chr | Start    | Stop     | Strand | Type  | Position | P7 reads | P7%   | P10 reads | P10%  | P14 reads | P14%  |
|-----------------|-----|----------|----------|--------|-------|----------|----------|-------|-----------|-------|-----------|-------|
| mmu-mir-16-2-5p | 3   | 68813840 | 68813861 | +      | Indel | 22       | 3        | 0.7%  | 4         | 1.0%  | 0         | 0.0%  |
| mmu-mir-16-2-5p | 3   | 68813840 | 68813861 | +      | edit  | 1        | 0        | 0.0%  | 0         | 0.0%  | 0         | 0.0%  |
| mmu-mir-16-2-5p | 3   | 68813840 | 68813861 | +      | edit  | 2        | 0        | 0.0%  | 0         | 0.0%  | 0         | 0.0%  |
| mmu-mir-16-2-5p | 3   | 68813840 | 68813861 | +      | edit  | 3        | 0        | 0.0%  | 0         | 0.0%  | 0         | 0.0%  |
| mmu-mir-16-2-5p | 3   | 68813840 | 68813861 | +      | edit  | 4        | 0        | 0.0%  | 0         | 0.0%  | 0         | 0.0%  |
| mmu-mir-16-2-5p | 3   | 68813840 | 68813861 | +      | edit  | 5        | 0        | 0.0%  | 0         | 0.0%  | 0         | 0.0%  |
| mmu-mir-16-2-5p | 3   | 68813840 | 68813861 | +      | edit  | 6        | 0        | 0.0%  | 0         | 0.0%  | 0         | 0.0%  |
| mmu-mir-16-2-5p | 3   | 68813840 | 68813861 | +      | edit  | 7        | 0        | 0.0%  | 0         | 0.0%  | 0         | 0.0%  |
| mmu-mir-16-2-5p | 3   | 68813840 | 68813861 | +      | edit  | 8        | 0        | 0.0%  | 0         | 0.0%  | 0         | 0.0%  |
| mmu-mir-16-2-5p | 3   | 68813840 | 68813861 | +      | edit  | 9        | 0        | 0.0%  | 0         | 0.0%  | 0         | 0.0%  |
| mmu-mir-16-2-5p | 3   | 68813840 | 68813861 | +      | edit  | 10       | 0        | 0.0%  | 0         | 0.0%  | 0         | 0.0%  |
| mmu-mir-16-2-5p | 3   | 68813840 | 68813861 | +      | edit  | 11       | 0        | 0.0%  | 0         | 0.0%  | 0         | 0.0%  |
| mmu-mir-16-2-5p | 3   | 68813840 | 68813861 | +      | edit  | 12       | 0        | 0.0%  | 0         | 0.0%  | 0         | 0.0%  |
| mmu-mir-16-2-5p | 3   | 68813840 | 68813861 | +      | edit  | 13       | 0        | 0.0%  | 0         | 0.0%  | 0         | 0.0%  |
| mmu-mir-16-2-5p | 3   | 68813840 | 68813861 | +      | edit  | 14       | 0        | 0.0%  | 0         | 0.0%  | 0         | 0.0%  |
| mmu-mir-16-2-5p | 3   | 68813840 | 68813861 | +      | edit  | 15       | 0        | 0.0%  | 0         | 0.0%  | 0         | 0.0%  |
| mmu-mir-16-2-5p | 3   | 68813840 | 68813861 | +      | edit  | 16       | 0        | 0.0%  | 0         | 0.0%  | 0         | 0.0%  |
| mmu-mir-16-2-5p | 3   | 68813840 | 68813861 | +      | edit  | 17       | 0        | 0.0%  | 0         | 0.0%  | 0         | 0.0%  |
| mmu-mir-16-2-5p | 3   | 68813840 | 68813861 | +      | edit  | 18       | 0        | 0.0%  | 0         | 0.0%  | 0         | 0.0%  |
| mmu-mir-16-2-5p | 3   | 68813840 | 68813861 | +      | edit  | 19       | 0        | 0.0%  | 0         | 0.0%  | 0         | 0.0%  |
| mmu-mir-16-2-5p | 3   | 68813840 | 68813861 | +      | edit  | 20       | 0        | 0.0%  | 0         | 0.0%  | 0         | 0.0%  |
| mmu-mir-16-2-5p | 3   | 68813840 | 68813861 | +      | edit  | 21       | 0        | 0.0%  | 0         | 0.0%  | 4         | 1.8%  |
| mmu-mir-16-2-5p | 3   | 68813840 | 68813861 | +      | edit  | 22       | 0        | 0.0%  | 0         | 0.0%  | 0         | 0.0%  |
| EDITED          |     |          |          |        |       |          | 3        | 0.7%  | 4         | 1.0%  | 4         | 1.8%  |
| CANONICAL       |     |          |          |        |       |          | 406      | 99.3% | 393       | 99.0% | 222       | 98.2% |
| TOTAL           |     |          |          |        |       |          | 409      |       | 397       |       | 226       |       |

| miRNA         | Chr | Start     | Stop      | Strand | Type    | Position | P7 reads | P7%   | P10 reads | P10%  | P14 reads | P14%  |
|---------------|-----|-----------|-----------|--------|---------|----------|----------|-------|-----------|-------|-----------|-------|
| mmu-mir-17-3p | 14  | 115442943 | 115442964 | +      | 3' Edit | 3'       | 10       | 1.2%  | 0         | 0.0%  | 3         | 1.0%  |
| mmu-mir-17-3p | 14  | 115442943 | 115442964 | +      | Indel   | 22       | 3        | 0.4%  | 0         | 0.0%  | 0         | 0.0%  |
| mmu-mir-17-3p | 14  | 115442943 | 115442964 | +      | edit    | 1        | 0        | 0.0%  | 0         | 0.0%  | 0         | 0.0%  |
| mmu-mir-17-3p | 14  | 115442943 | 115442964 | +      | edit    | 2        | 0        | 0.0%  | 0         | 0.0%  | 0         | 0.0%  |
| mmu-mir-17-3p | 14  | 115442943 | 115442964 | +      | edit    | 3        | 0        | 0.0%  | 0         | 0.0%  | 0         | 0.0%  |
| mmu-mir-17-3p | 14  | 115442943 | 115442964 | +      | edit    | 4        | 0        | 0.0%  | 0         | 0.0%  | 0         | 0.0%  |
| mmu-mir-17-3p | 14  | 115442943 | 115442964 | +      | edit    | 5        | 0        | 0.0%  | 0         | 0.0%  | 0         | 0.0%  |
| mmu-mir-17-3p | 14  | 115442943 | 115442964 | +      | edit    | 6        | 0        | 0.0%  | 0         | 0.0%  | 0         | 0.0%  |
| mmu-mir-17-3p | 14  | 115442943 | 115442964 | +      | edit    | 7        | 0        | 0.0%  | 0         | 0.0%  | 0         | 0.0%  |
| mmu-mir-17-3p | 14  | 115442943 | 115442964 | +      | edit    | 8        | 3        | 0.4%  | 0         | 0.0%  | 0         | 0.0%  |
| mmu-mir-17-3p | 14  | 115442943 | 115442964 | +      | edit    | 9        | 0        | 0.0%  | 0         | 0.0%  | 0         | 0.0%  |
| mmu-mir-17-3p | 14  | 115442943 | 115442964 | +      | edit    | 10       | 0        | 0.0%  | 0         | 0.0%  | 0         | 0.0%  |
| mmu-mir-17-3p | 14  | 115442943 | 115442964 | +      | edit    | 11       | 0        | 0.0%  | 0         | 0.0%  | 0         | 0.0%  |
| mmu-mir-17-3p | 14  | 115442943 | 115442964 | +      | edit    | 12       | 0        | 0.0%  | 0         | 0.0%  | 0         | 0.0%  |
| mmu-mir-17-3p | 14  | 115442943 | 115442964 | +      | edit    | 13       | 0        | 0.0%  | 0         | 0.0%  | 0         | 0.0%  |
| mmu-mir-17-3p | 14  | 115442943 | 115442964 | +      | edit    | 14       | 0        | 0.0%  | 0         | 0.0%  | 0         | 0.0%  |
| mmu-mir-17-3p | 14  | 115442943 | 115442964 | +      | edit    | 15       | 0        | 0.0%  | 4         | 0.7%  | 0         | 0.0%  |
| mmu-mir-17-3p | 14  | 115442943 | 115442964 | +      | edit    | 16       | 0        | 0.0%  | 0         | 0.0%  | 0         | 0.0%  |
| mmu-mir-17-3p | 14  | 115442943 | 115442964 | +      | edit    | 17       | 0        | 0.0%  | 0         | 0.0%  | 0         | 0.0%  |
| mmu-mir-17-3p | 14  | 115442943 | 115442964 | +      | edit    | 18       | 0        | 0.0%  | 0         | 0.0%  | 0         | 0.0%  |
| mmu-mir-17-3p | 14  | 115442943 | 115442964 | +      | edit    | 19       | 0        | 0.0%  | 0         | 0.0%  | 0         | 0.0%  |
| mmu-mir-17-3p | 14  | 115442943 | 115442964 | +      | edit    | 20       | 0        | 0.0%  | 0         | 0.0%  | 0         | 0.0%  |
| mmu-mir-17-3p | 14  | 115442943 | 115442964 | +      | edit    | 21       | 0        | 0.0%  | 0         | 0.0%  | 0         | 0.0%  |
| mmu-mir-17-3p | 14  | 115442943 | 115442964 | +      | edit    | 22       | 0        | 0.0%  | 0         | 0.0%  | 0         | 0.0%  |
| EDITED        |     |           |           |        |         |          | 16       | 2.0%  | 4         | 0.7%  | 3         | 1.0%  |
| CANONICAL     |     |           |           |        |         |          | 792      | 98.0% | 464       | 99.3% | 293       | 99.0% |
| TOTAL         |     |           |           |        |         |          | 808      |       | 468       |       | 296       |       |

| miRNA         | Chr | Start    | Stop     | Strand | Type    | Position | P7 reads | P7%   | P10 reads | P10%  | P14 reads | P14%  |
|---------------|-----|----------|----------|--------|---------|----------|----------|-------|-----------|-------|-----------|-------|
| mmu-mir-21-5p | 11  | 86397622 | 86397643 | -      | 5' Edit | 5'       | 17       | 0.3%  | 0         | 0.0%  | 10        | 0.3%  |
| mmu-mir-21-5p | 11  | 86397622 | 86397643 | -      | edit    | 1        | 0        | 0.0%  | 0         | 0.0%  | 0         | 0.0%  |
| mmu-mir-21-5p | 11  | 86397622 | 86397643 | -      | edit    | 2        | 0        | 0.0%  | 0         | 0.0%  | 0         | 0.0%  |
| mmu-mir-21-5p | 11  | 86397622 | 86397643 | -      | edit    | 3        | 0        | 0.0%  | 0         | 0.0%  | 0         | 0.0%  |
| mmu-mir-21-5p | 11  | 86397622 | 86397643 | -      | edit    | 4        | 0        | 0.0%  | 0         | 0.0%  | 0         | 0.0%  |
| mmu-mir-21-5p | 11  | 86397622 | 86397643 | -      | edit    | 5        | 0        | 0.0%  | 0         | 0.0%  | 0         | 0.0%  |
| mmu-mir-21-5p | 11  | 86397622 | 86397643 | -      | edit    | 6        | 0        | 0.0%  | 0         | 0.0%  | 0         | 0.0%  |
| mmu-mir-21-5p | 11  | 86397622 | 86397643 | -      | edit    | 7        | 0        | 0.0%  | 0         | 0.0%  | 0         | 0.0%  |
| mmu-mir-21-5p | 11  | 86397622 | 86397643 | -      | edit    | 8        | 7        | 0.1%  | 0         | 0.0%  | 0         | 0.0%  |
| mmu-mir-21-5p | 11  | 86397622 | 86397643 | -      | edit    | 9        | 3        | 0.0%  | 0         | 0.0%  | 0         | 0.0%  |
| mmu-mir-21-5p | 11  | 86397622 | 86397643 | -      | edit    | 10       | 0        | 0.0%  | 0         | 0.0%  | 0         | 0.0%  |
| mmu-mir-21-5p | 11  | 86397622 | 86397643 | -      | edit    | 11       | 0        | 0.0%  | 0         | 0.0%  | 0         | 0.0%  |
| mmu-mir-21-5p | 11  | 86397622 | 86397643 | -      | edit    | 12       | 0        | 0.0%  | 0         | 0.0%  | 0         | 0.0%  |
| mmu-mir-21-5p | 11  | 86397622 | 86397643 | -      | edit    | 13       | 0        | 0.0%  | 0         | 0.0%  | 0         | 0.0%  |
| mmu-mir-21-5p | 11  | 86397622 | 86397643 | -      | edit    | 14       | 0        | 0.0%  | 0         | 0.0%  | 0         | 0.0%  |
| mmu-mir-21-5p | 11  | 86397622 | 86397643 | -      | edit    | 15       | 0        | 0.0%  | 5         | 0.1%  | 0         | 0.0%  |
| mmu-mir-21-5p | 11  | 86397622 | 86397643 | -      | edit    | 16       | 0        | 0.0%  | 27        | 0.5%  | 3         | 0.1%  |
| mmu-mir-21-5p | 11  | 86397622 | 86397643 | -      | edit    | 17       | 13       | 0.2%  | 0         | 0.0%  | 5         | 0.1%  |
| mmu-mir-21-5p | 11  | 86397622 | 86397643 | -      | edit    | 18       | 5        | 0.1%  | 0         | 0.0%  | 3         | 0.1%  |
| mmu-mir-21-5p | 11  | 86397622 | 86397643 | -      | edit    | 19       | 37       | 0.6%  | 8         | 0.2%  | 14        | 0.4%  |
| mmu-mir-21-5p | 11  | 86397622 | 86397643 | -      | edit    | 20       | 0        | 0.0%  | 0         | 0.0%  | 0         | 0.0%  |
| mmu-mir-21-5p | 11  | 86397622 | 86397643 | -      | edit    | 21       | 7        | 0.1%  | 0         | 0.0%  | 0         | 0.0%  |
| mmu-mir-21-5p | 11  | 86397622 | 86397643 | -      | edit    | 22       | 0        | 0.0%  | 0         | 0.0%  | 0         | 0.0%  |
| EDITED        |     |          |          |        |         |          | 89       | 1.3%  | 40        | 0.8%  | 34        | 1.1%  |
| CANONICAL     |     |          |          |        |         |          | 6659     | 98.7% | 4952      | 99.2% | 3182      | 98.9% |
| TOTAL         |     |          |          |        |         |          | 6748     |       | 4992      |       | 3216      |       |

| miRNA         | Chr | Start    | Stop     | Strand | Type | Position | P7 reads | P7%   | P10 reads | P10%  | P14 reads | P14%  |
|---------------|-----|----------|----------|--------|------|----------|----------|-------|-----------|-------|-----------|-------|
| mmu-mir-22-3p | 11  | 75277274 | 75277295 | +      | edit | 1        | 0        | 0.0%  | 0         | 0.0%  | 0         | 0.0%  |
| mmu-mir-22-3p | 11  | 75277274 | 75277295 | +      | edit | 2        | 0        | 0.0%  | 0         | 0.0%  | 0         | 0.0%  |
| mmu-mir-22-3p | 11  | 75277274 | 75277295 | +      | edit | 3        | 0        | 0.0%  | 0         | 0.0%  | 0         | 0.0%  |
| mmu-mir-22-3p | 11  | 75277274 | 75277295 | +      | edit | 4        | 0        | 0.0%  | 0         | 0.0%  | 0         | 0.0%  |
| mmu-mir-22-3p | 11  | 75277274 | 75277295 | +      | edit | 5        | 0        | 0.0%  | 0         | 0.0%  | 0         | 0.0%  |
| mmu-mir-22-3p | 11  | 75277274 | 75277295 | +      | edit | 6        | 0        | 0.0%  | 0         | 0.0%  | 0         | 0.0%  |
| mmu-mir-22-3p | 11  | 75277274 | 75277295 | +      | edit | 7        | 0        | 0.0%  | 0         | 0.0%  | 0         | 0.0%  |
| mmu-mir-22-3p | 11  | 75277274 | 75277295 | +      | edit | 8        | 0        | 0.0%  | 3         | 0.3%  | 0         | 0.0%  |
| mmu-mir-22-3p | 11  | 75277274 | 75277295 | +      | edit | 9        | 0        | 0.0%  | 0         | 0.0%  | 0         | 0.0%  |
| mmu-mir-22-3p | 11  | 75277274 | 75277295 | +      | edit | 10       | 0        | 0.0%  | 0         | 0.0%  | 0         | 0.0%  |
| mmu-mir-22-3p | 11  | 75277274 | 75277295 | +      | edit | 11       | 0        | 0.0%  | 0         | 0.0%  | 0         | 0.0%  |
| mmu-mir-22-3p | 11  | 75277274 | 75277295 | +      | edit | 12       | 0        | 0.0%  | 0         | 0.0%  | 0         | 0.0%  |
| mmu-mir-22-3p | 11  | 75277274 | 75277295 | +      | edit | 13       | 0        | 0.0%  | 0         | 0.0%  | 0         | 0.0%  |
| mmu-mir-22-3p | 11  | 75277274 | 75277295 | +      | edit | 14       | 0        | 0.0%  | 0         | 0.0%  | 0         | 0.0%  |
| mmu-mir-22-3p | 11  | 75277274 | 75277295 | +      | edit | 15       | 0        | 0.0%  | 4         | 0.4%  | 0         | 0.0%  |
| mmu-mir-22-3p | 11  | 75277274 | 75277295 | +      | edit | 16       | 0        | 0.0%  | 0         | 0.0%  | 0         | 0.0%  |
| mmu-mir-22-3p | 11  | 75277274 | 75277295 | +      | edit | 17       | 0        | 0.0%  | 0         | 0.0%  | 0         | 0.0%  |
| mmu-mir-22-3p | 11  | 75277274 | 75277295 | +      | edit | 18       | 0        | 0.0%  | 0         | 0.0%  | 0         | 0.0%  |
| mmu-mir-22-3p | 11  | 75277274 | 75277295 | +      | edit | 19       | 6        | 0.5%  | 8         | 0.8%  | 6         | 1.0%  |
| mmu-mir-22-3p | 11  | 75277274 | 75277295 | +      | edit | 20       | 0        | 0.0%  | 0         | 0.0%  | 0         | 0.0%  |
| mmu-mir-22-3p | 11  | 75277274 | 75277295 | +      | edit | 21       | 0        | 0.0%  | 0         | 0.0%  | 0         | 0.0%  |
| mmu-mir-22-3p | 11  | 75277274 | 75277295 | +      | edit | 22       | 0        | 0.0%  | 0         | 0.0%  | 0         | 0.0%  |
| EDITED        |     |          |          |        |      |          | 6        | 0.5%  | 15        | 1.5%  | 6         | 1.0%  |
| CANONICAL     |     |          |          |        |      |          | 1217     | 99.5% | 992       | 98.5% | 600       | 99.0% |
| TOTAL         |     |          |          |        |      |          | 1223     |       | 1007      |       | 606       |       |

| miRNA           | Chr | Start    | Stop     | Strand | Type    | Position | P7 reads | P7%   | P10 reads | P10%  | P14 reads | P14%   |
|-----------------|-----|----------|----------|--------|---------|----------|----------|-------|-----------|-------|-----------|--------|
| mmu-mir-24-1-3p | 13  | 63402559 | 63402580 | +      | 3' Edit | 3'       | 5        | 0.4%  | 0         | 0.0%  | 0         | 0.0%   |
| mmu-mir-24-1-3p | 13  | 63402559 | 63402580 | +      | edit    | 1        | 0        | 0.0%  | 0         | 0.0%  | 0         | 0.0%   |
| mmu-mir-24-1-3p | 13  | 63402559 | 63402580 | +      | edit    | 2        | 0        | 0.0%  | 0         | 0.0%  | 0         | 0.0%   |
| mmu-mir-24-1-3p | 13  | 63402559 | 63402580 | +      | edit    | 3        | 0        | 0.0%  | 0         | 0.0%  | 0         | 0.0%   |
| mmu-mir-24-1-3p | 13  | 63402559 | 63402580 | +      | edit    | 4        | 0        | 0.0%  | 0         | 0.0%  | 0         | 0.0%   |
| mmu-mir-24-1-3p | 13  | 63402559 | 63402580 | +      | edit    | 5        | 0        | 0.0%  | 0         | 0.0%  | 0         | 0.0%   |
| mmu-mir-24-1-3p | 13  | 63402559 | 63402580 | +      | edit    | 6        | 0        | 0.0%  | 0         | 0.0%  | 0         | 0.0%   |
| mmu-mir-24-1-3p | 13  | 63402559 | 63402580 | +      | edit    | 7        | 0        | 0.0%  | 0         | 0.0%  | 0         | 0.0%   |
| mmu-mir-24-1-3p | 13  | 63402559 | 63402580 | +      | edit    | 8        | 0        | 0.0%  | 0         | 0.0%  | 0         | 0.0%   |
| mmu-mir-24-1-3p | 13  | 63402559 | 63402580 | +      | edit    | 9        | 0        | 0.0%  | 0         | 0.0%  | 0         | 0.0%   |
| mmu-mir-24-1-3p | 13  | 63402559 | 63402580 | +      | edit    | 10       | 0        | 0.0%  | 0         | 0.0%  | 0         | 0.0%   |
| mmu-mir-24-1-3p | 13  | 63402559 | 63402580 | +      | edit    | 11       | 0        | 0.0%  | 0         | 0.0%  | 0         | 0.0%   |
| mmu-mir-24-1-3p | 13  | 63402559 | 63402580 | +      | edit    | 12       | 0        | 0.0%  | 0         | 0.0%  | 0         | 0.0%   |
| mmu-mir-24-1-3p | 13  | 63402559 | 63402580 | +      | edit    | 13       | 0        | 0.0%  | 0         | 0.0%  | 0         | 0.0%   |
| mmu-mir-24-1-3p | 13  | 63402559 | 63402580 | +      | edit    | 14       | 0        | 0.0%  | 0         | 0.0%  | 0         | 0.0%   |
| mmu-mir-24-1-3p | 13  | 63402559 | 63402580 | +      | edit    | 15       | 0        | 0.0%  | 3         | 0.3%  | 0         | 0.0%   |
| mmu-mir-24-1-3p | 13  | 63402559 | 63402580 | +      | edit    | 16       | 0        | 0.0%  | 0         | 0.0%  | 0         | 0.0%   |
| mmu-mir-24-1-3p | 13  | 63402559 | 63402580 | +      | edit    | 17       | 0        | 0.0%  | 0         | 0.0%  | 0         | 0.0%   |
| mmu-mir-24-1-3p | 13  | 63402559 | 63402580 | +      | edit    | 18       | 0        | 0.0%  | 0         | 0.0%  | 0         | 0.0%   |
| mmu-mir-24-1-3p | 13  | 63402559 | 63402580 | +      | edit    | 19       | 0        | 0.0%  | 5         | 0.5%  | 0         | 0.0%   |
| mmu-mir-24-1-3p | 13  | 63402559 | 63402580 | +      | edit    | 20       | 0        | 0.0%  | 0         | 0.0%  | 0         | 0.0%   |
| mmu-mir-24-1-3p | 13  | 63402559 | 63402580 | +      | edit    | 21       | 0        | 0.0%  | 0         | 0.0%  | 0         | 0.0%   |
| mmu-mir-24-1-3p | 13  | 63402559 | 63402580 | +      | edit    | 22       | 0        | 0.0%  | 0         | 0.0%  | 0         | 0.0%   |
| EDITED          |     |          |          |        |         |          | 5        | 0.4%  | 8         | 0.9%  | 0         | 0.0%   |
| CANONICAL       |     |          |          |        |         |          | 1248     | 99.6% | 912       | 99.1% | 398       | 100.0% |
| TOTAL           |     |          |          |        |         |          | 1253     |       | 920       |       | 398       |        |

| miRNA           | Chr | Start    | Stop     | Strand | Type    | Position | P7 reads | P7%   | P10 reads | P10%  | P14 reads | P14%   |
|-----------------|-----|----------|----------|--------|---------|----------|----------|-------|-----------|-------|-----------|--------|
| mmu-mir-24-2-3p | 8   | 86732774 | 86732795 | +      | 3' Edit | 3'       | 4        | 0.3%  | 0         | 0.0%  | 0         | 0.0%   |
| mmu-mir-24-2-3p | 8   | 86732774 | 86732795 | +      | edit    | 1        | 0        | 0.0%  | 0         | 0.0%  | 0         | 0.0%   |
| mmu-mir-24-2-3p | 8   | 86732774 | 86732795 | +      | edit    | 2        | 0        | 0.0%  | 0         | 0.0%  | 0         | 0.0%   |
| mmu-mir-24-2-3p | 8   | 86732774 | 86732795 | +      | edit    | 3        | 0        | 0.0%  | 0         | 0.0%  | 0         | 0.0%   |
| mmu-mir-24-2-3p | 8   | 86732774 | 86732795 | +      | edit    | 4        | 0        | 0.0%  | 0         | 0.0%  | 0         | 0.0%   |
| mmu-mir-24-2-3p | 8   | 86732774 | 86732795 | +      | edit    | 5        | 0        | 0.0%  | 0         | 0.0%  | 0         | 0.0%   |
| mmu-mir-24-2-3p | 8   | 86732774 | 86732795 | +      | edit    | 6        | 0        | 0.0%  | 0         | 0.0%  | 0         | 0.0%   |
| mmu-mir-24-2-3p | 8   | 86732774 | 86732795 | +      | edit    | 7        | 0        | 0.0%  | 0         | 0.0%  | 0         | 0.0%   |
| mmu-mir-24-2-3p | 8   | 86732774 | 86732795 | +      | edit    | 8        | 0        | 0.0%  | 0         | 0.0%  | 0         | 0.0%   |
| mmu-mir-24-2-3p | 8   | 86732774 | 86732795 | +      | edit    | 9        | 0        | 0.0%  | 0         | 0.0%  | 0         | 0.0%   |
| mmu-mir-24-2-3p | 8   | 86732774 | 86732795 | +      | edit    | 10       | 0        | 0.0%  | 0         | 0.0%  | 0         | 0.0%   |
| mmu-mir-24-2-3p | 8   | 86732774 | 86732795 | +      | edit    | 11       | 0        | 0.0%  | 0         | 0.0%  | 0         | 0.0%   |
| mmu-mir-24-2-3p | 8   | 86732774 | 86732795 | +      | edit    | 12       | 0        | 0.0%  | 0         | 0.0%  | 0         | 0.0%   |
| mmu-mir-24-2-3p | 8   | 86732774 | 86732795 | +      | edit    | 13       | 0        | 0.0%  | 0         | 0.0%  | 0         | 0.0%   |
| mmu-mir-24-2-3p | 8   | 86732774 | 86732795 | +      | edit    | 14       | 0        | 0.0%  | 0         | 0.0%  | 0         | 0.0%   |
| mmu-mir-24-2-3p | 8   | 86732774 | 86732795 | +      | edit    | 15       | 0        | 0.0%  | 3         | 0.3%  | 0         | 0.0%   |
| mmu-mir-24-2-3p | 8   | 86732774 | 86732795 | +      | edit    | 16       | 0        | 0.0%  | 0         | 0.0%  | 0         | 0.0%   |
| mmu-mir-24-2-3p | 8   | 86732774 | 86732795 | +      | edit    | 17       | 0        | 0.0%  | 0         | 0.0%  | 0         | 0.0%   |
| mmu-mir-24-2-3p | 8   | 86732774 | 86732795 | +      | edit    | 18       | 0        | 0.0%  | 0         | 0.0%  | 0         | 0.0%   |
| mmu-mir-24-2-3p | 8   | 86732774 | 86732795 | +      | edit    | 19       | 0        | 0.0%  | 5         | 0.5%  | 0         | 0.0%   |
| mmu-mir-24-2-3p | 8   | 86732774 | 86732795 | +      | edit    | 20       | 0        | 0.0%  | 0         | 0.0%  | 0         | 0.0%   |
| mmu-mir-24-2-3p | 8   | 86732774 | 86732795 | +      | edit    | 21       | 0        | 0.0%  | 0         | 0.0%  | 0         | 0.0%   |
| mmu-mir-24-2-3p | 8   | 86732774 | 86732795 | +      | edit    | 22       | 0        | 0.0%  | 0         | 0.0%  | 0         | 0.0%   |
| EDITED          |     |          |          |        |         |          | 4        | 0.3%  | 8         | 0.9%  | 0         | 0.0%   |
| CANONICAL       |     |          |          |        |         |          | 1247     | 99.7% | 911       | 99.1% | 397       | 100.0% |
| TOTAL           |     |          |          |        |         |          | 1251     |       | 919       |       | 397       |        |

| miRNA         | Chr | Start     | Stop      | Strand | Type    | Position | P7 reads | P7%   | P10 reads | P10%  | P14 reads | P14%  |
|---------------|-----|-----------|-----------|--------|---------|----------|----------|-------|-----------|-------|-----------|-------|
| mmu-mir-25-5p | 5   | 138606560 | 138606581 | -      | 5' Edit | 5'       | 618      | 1.9%  | 0         | 0.0%  | 405       | 3.0%  |
| mmu-mir-25-5p | 5   | 138606560 | 138606581 | -      | edit    | 1        | 0        | 0.0%  | 0         | 0.0%  | 0         | 0.0%  |
| mmu-mir-25-5p | 5   | 138606560 | 138606581 | -      | edit    | 2        | 0        | 0.0%  | 0         | 0.0%  | 0         | 0.0%  |
| mmu-mir-25-5p | 5   | 138606560 | 138606581 | -      | edit    | 3        | 0        | 0.0%  | 0         | 0.0%  | 0         | 0.0%  |
| mmu-mir-25-5p | 5   | 138606560 | 138606581 | -      | edit    | 4        | 36       | 0.1%  | 13        | 0.1%  | 9         | 0.1%  |
| mmu-mir-25-5p | 5   | 138606560 | 138606581 | -      | edit    | 5        | 0        | 0.0%  | 0         | 0.0%  | 0         | 0.0%  |
| mmu-mir-25-5p | 5   | 138606560 | 138606581 | -      | edit    | 6        | 0        | 0.0%  | 0         | 0.0%  | 0         | 0.0%  |
| mmu-mir-25-5p | 5   | 138606560 | 138606581 | -      | edit    | 7        | 0        | 0.0%  | 0         | 0.0%  | 0         | 0.0%  |
| mmu-mir-25-5p | 5   | 138606560 | 138606581 | -      | edit    | 8        | 28       | 0.1%  | 3         | 0.0%  | 10        | 0.1%  |
| mmu-mir-25-5p | 5   | 138606560 | 138606581 | -      | edit    | 9        | 0        | 0.0%  | 0         | 0.0%  | 0         | 0.0%  |
| mmu-mir-25-5p | 5   | 138606560 | 138606581 | -      | edit    | 10       | 0        | 0.0%  | 0         | 0.0%  | 0         | 0.0%  |
| mmu-mir-25-5p | 5   | 138606560 | 138606581 | -      | edit    | 11       | 0        | 0.0%  | 0         | 0.0%  | 0         | 0.0%  |
| mmu-mir-25-5p | 5   | 138606560 | 138606581 | -      | edit    | 12       | 0        | 0.0%  | 0         | 0.0%  | 0         | 0.0%  |
| mmu-mir-25-5p | 5   | 138606560 | 138606581 | -      | edit    | 13       | 0        | 0.0%  | 0         | 0.0%  | 0         | 0.0%  |
| mmu-mir-25-5p | 5   | 138606560 | 138606581 | -      | edit    | 14       | 0        | 0.0%  | 0         | 0.0%  | 0         | 0.0%  |
| mmu-mir-25-5p | 5   | 138606560 | 138606581 | -      | edit    | 15       | 57       | 0.2%  | 29        | 0.2%  | 43        | 0.3%  |
| mmu-mir-25-5p | 5   | 138606560 | 138606581 | -      | edit    | 16       | 0        | 0.0%  | 0         | 0.0%  | 0         | 0.0%  |
| mmu-mir-25-5p | 5   | 138606560 | 138606581 | -      | edit    | 17       | 71       | 0.2%  | 43        | 0.3%  | 26        | 0.2%  |
| mmu-mir-25-5p | 5   | 138606560 | 138606581 | -      | edit    | 18       | 0        | 0.0%  | 0         | 0.0%  | 0         | 0.0%  |
| mmu-mir-25-5p | 5   | 138606560 | 138606581 | -      | edit    | 19       | 645      | 2.0%  | 266       | 1.9%  | 385       | 2.9%  |
| mmu-mir-25-5p | 5   | 138606560 | 138606581 | -      | edit    | 20       | 0        | 0.0%  | 0         | 0.0%  | 0         | 0.0%  |
| mmu-mir-25-5p | 5   | 138606560 | 138606581 | -      | edit    | 21       | 0        | 0.0%  | 0         | 0.0%  | 0         | 0.0%  |
| mmu-mir-25-5p | 5   | 138606560 | 138606581 | -      | edit    | 22       | 0        | 0.0%  | 0         | 0.0%  | 0         | 0.0%  |
| EDITED        |     |           |           |        |         |          | 1455     | 4.5%  | 354       | 2.5%  | 877       | 6.6%  |
| CANONICAL     |     |           |           |        |         |          | 30958    | 95.5% | 13809     | 97.5% | 12435     | 93.4% |
| TOTAL         |     |           |           |        |         |          | 32413    |       | 14163     |       | 13312     |       |

| miRNA            | Chr | Start     | Stop      | Strand | Type    | Position | P7 reads | P7%   | P10 reads | P10%  | P14 reads | P14%  |
|------------------|-----|-----------|-----------|--------|---------|----------|----------|-------|-----------|-------|-----------|-------|
| mmu-mir-26a-1-5p | 9   | 118940929 | 118940950 | +      | 3' Edit | 3'       | 6        | 0.1%  | 0         | 0.0%  | 0         | 0.0%  |
| mmu-mir-26a-1-5p | 9   | 118940929 | 118940950 | +      | edit    | 1        | 0        | 0.0%  | 0         | 0.0%  | 0         | 0.0%  |
| mmu-mir-26a-1-5p | 9   | 118940929 | 118940950 | +      | edit    | 2        | 0        | 0.0%  | 0         | 0.0%  | 0         | 0.0%  |
| mmu-mir-26a-1-5p | 9   | 118940929 | 118940950 | +      | edit    | 3        | 0        | 0.0%  | 0         | 0.0%  | 0         | 0.0%  |
| mmu-mir-26a-1-5p | 9   | 118940929 | 118940950 | +      | edit    | 4        | 5        | 0.1%  | 0         | 0.0%  | 0         | 0.0%  |
| mmu-mir-26a-1-5p | 9   | 118940929 | 118940950 | +      | edit    | 5        | 0        | 0.0%  | 0         | 0.0%  | 0         | 0.0%  |
| mmu-mir-26a-1-5p | 9   | 118940929 | 118940950 | +      | edit    | 6        | 0        | 0.0%  | 0         | 0.0%  | 0         | 0.0%  |
| mmu-mir-26a-1-5p | 9   | 118940929 | 118940950 | +      | edit    | 7        | 0        | 0.0%  | 0         | 0.0%  | 0         | 0.0%  |
| mmu-mir-26a-1-5p | 9   | 118940929 | 118940950 | +      | edit    | 8        | 5        | 0.1%  | 0         | 0.0%  | 0         | 0.0%  |
| mmu-mir-26a-1-5p | 9   | 118940929 | 118940950 | +      | edit    | 9        | 0        | 0.0%  | 0         | 0.0%  | 0         | 0.0%  |
| mmu-mir-26a-1-5p | 9   | 118940929 | 118940950 | +      | edit    | 10       | 0        | 0.0%  | 0         | 0.0%  | 0         | 0.0%  |
| mmu-mir-26a-1-5p | 9   | 118940929 | 118940950 | +      | edit    | 11       | 0        | 0.0%  | 0         | 0.0%  | 0         | 0.0%  |
| mmu-mir-26a-1-5p | 9   | 118940929 | 118940950 | +      | edit    | 12       | 0        | 0.0%  | 0         | 0.0%  | 0         | 0.0%  |
| mmu-mir-26a-1-5p | 9   | 118940929 | 118940950 | +      | edit    | 13       | 0        | 0.0%  | 0         | 0.0%  | 0         | 0.0%  |
| mmu-mir-26a-1-5p | 9   | 118940929 | 118940950 | +      | edit    | 14       | 0        | 0.0%  | 0         | 0.0%  | 0         | 0.0%  |
| mmu-mir-26a-1-5p | 9   | 118940929 | 118940950 | +      | edit    | 15       | 8        | 0.1%  | 9         | 0.2%  | 0         | 0.0%  |
| mmu-mir-26a-1-5p | 9   | 118940929 | 118940950 | +      | edit    | 16       | 0        | 0.0%  | 0         | 0.0%  | 0         | 0.0%  |
| mmu-mir-26a-1-5p | 9   | 118940929 | 118940950 | +      | edit    | 17       | 0        | 0.0%  | 0         | 0.0%  | 0         | 0.0%  |
| mmu-mir-26a-1-5p | 9   | 118940929 | 118940950 | +      | edit    | 18       | 0        | 0.0%  | 0         | 0.0%  | 0         | 0.0%  |
| mmu-mir-26a-1-5p | 9   | 118940929 | 118940950 | +      | edit    | 19       | 18       | 0.3%  | 16        | 0.4%  | 4         | 0.2%  |
| mmu-mir-26a-1-5p | 9   | 118940929 | 118940950 | +      | edit    | 20       | 0        | 0.0%  | 0         | 0.0%  | 0         | 0.0%  |
| mmu-mir-26a-1-5p | 9   | 118940929 | 118940950 | +      | edit    | 21       | 0        | 0.0%  | 0         | 0.0%  | 0         | 0.0%  |
| mmu-mir-26a-1-5p | 9   | 118940929 | 118940950 | +      | edit    | 22       | 0        | 0.0%  | 0         | 0.0%  | 0         | 0.0%  |
| EDITED           |     |           |           |        |         |          | 41       | 0.7%  | 24        | 0.6%  | 4         | 0.2%  |
| CANONICAL        |     |           |           |        |         |          | 6209     | 99.3% | 4204      | 99.4% | 2217      | 99.8% |
| TOTAL            |     |           |           |        |         |          | 6250     |       | 4228      |       | 2221      |       |



| miRNA            | Chr | Start     | Stop      | Strand | Type    | Position | P7 reads | P7%   | P10 reads | P10%  | P14 reads | P14%  |
|------------------|-----|-----------|-----------|--------|---------|----------|----------|-------|-----------|-------|-----------|-------|
| mmu-mir-26a-2-5p | 10  | 126432599 | 126432620 | +      | 3' Edit | 3'       | 59       | 0.9%  | 0         | 0.0%  | 33        | 1.4%  |
| mmu-mir-26a-2-5p | 10  | 126432599 | 126432620 | +      | Indel   | 22       | 0        | 0.0%  | 12        | 0.3%  | 0         | 0.0%  |
| mmu-mir-26a-2-5p | 10  | 126432599 | 126432620 | +      | edit    | 1        | 0        | 0.0%  | 0         | 0.0%  | 0         | 0.0%  |
| mmu-mir-26a-2-5p | 10  | 126432599 | 126432620 | +      | edit    | 2        | 0        | 0.0%  | 0         | 0.0%  | 0         | 0.0%  |
| mmu-mir-26a-2-5p | 10  | 126432599 | 126432620 | +      | edit    | 3        | 0        | 0.0%  | 0         | 0.0%  | 0         | 0.0%  |
| mmu-mir-26a-2-5p | 10  | 126432599 | 126432620 | +      | edit    | 4        | 5        | 0.1%  | 0         | 0.0%  | 0         | 0.0%  |
| mmu-mir-26a-2-5p | 10  | 126432599 | 126432620 | +      | edit    | 5        | 0        | 0.0%  | 0         | 0.0%  | 0         | 0.0%  |
| mmu-mir-26a-2-5p | 10  | 126432599 | 126432620 | +      | edit    | 6        | 0        | 0.0%  | 0         | 0.0%  | 0         | 0.0%  |
| mmu-mir-26a-2-5p | 10  | 126432599 | 126432620 | +      | edit    | 7        | 0        | 0.0%  | 0         | 0.0%  | 0         | 0.0%  |
| mmu-mir-26a-2-5p | 10  | 126432599 | 126432620 | +      | edit    | 8        | 5        | 0.1%  | 0         | 0.0%  | 0         | 0.0%  |
| mmu-mir-26a-2-5p | 10  | 126432599 | 126432620 | +      | edit    | 9        | 0        | 0.0%  | 0         | 0.0%  | 0         | 0.0%  |
| mmu-mir-26a-2-5p | 10  | 126432599 | 126432620 | +      | edit    | 10       | 0        | 0.0%  | 0         | 0.0%  | 0         | 0.0%  |
| mmu-mir-26a-2-5p | 10  | 126432599 | 126432620 | +      | edit    | 11       | 0        | 0.0%  | 0         | 0.0%  | 0         | 0.0%  |
| mmu-mir-26a-2-5p | 10  | 126432599 | 126432620 | +      | edit    | 12       | 0        | 0.0%  | 0         | 0.0%  | 0         | 0.0%  |
| mmu-mir-26a-2-5p | 10  | 126432599 | 126432620 | +      | edit    | 13       | 0        | 0.0%  | 0         | 0.0%  | 0         | 0.0%  |
| mmu-mir-26a-2-5p | 10  | 126432599 | 126432620 | +      | edit    | 14       | 0        | 0.0%  | 0         | 0.0%  | 0         | 0.0%  |
| mmu-mir-26a-2-5p | 10  | 126432599 | 126432620 | +      | edit    | 15       | 8        | 0.1%  | 9         | 0.2%  | 0         | 0.0%  |
| mmu-mir-26a-2-5p | 10  | 126432599 | 126432620 | +      | edit    | 16       | 0        | 0.0%  | 0         | 0.0%  | 0         | 0.0%  |
| mmu-mir-26a-2-5p | 10  | 126432599 | 126432620 | +      | edit    | 17       | 0        | 0.0%  | 0         | 0.0%  | 0         | 0.0%  |
| mmu-mir-26a-2-5p | 10  | 126432599 | 126432620 | +      | edit    | 18       | 0        | 0.0%  | 0         | 0.0%  | 0         | 0.0%  |
| mmu-mir-26a-2-5p | 10  | 126432599 | 126432620 | +      | edit    | 19       | 19       | 0.3%  | 16        | 0.4%  | 4         | 0.2%  |
| mmu-mir-26a-2-5p | 10  | 126432599 | 126432620 | +      | edit    | 20       | 0        | 0.0%  | 0         | 0.0%  | 0         | 0.0%  |
| mmu-mir-26a-2-5p | 10  | 126432599 | 126432620 | +      | edit    | 21       | 0        | 0.0%  | 0         | 0.0%  | 0         | 0.0%  |
| mmu-mir-26a-2-5p | 10  | 126432599 | 126432620 | +      | edit    | 22       | 0        | 0.0%  | 0         | 0.0%  | 0         | 0.0%  |
| EDITED           |     |           |           |        |         |          | 95       | 1.5%  | 36        | 0.8%  | 37        | 1.6%  |
| CANONICAL        |     |           |           |        |         |          | 6270     | 98.5% | 4259      | 99.2% | 2249      | 98.4% |
| TOTAL            |     |           |           |        |         |          | 6365     |       | 4295      |       | 2286      |       |

| miRNA          | Chr | Start    | Stop     | Strand | Type     | Position | P7 reads | P7%   | P10 reads | P10%  | P14 reads | P14%  |
|----------------|-----|----------|----------|--------|----------|----------|----------|-------|-----------|-------|-----------|-------|
| mmu-mir-26b-5p | 1   | 74440898 | 74440918 | +      | 3' Edit  | 3'       | 3        | 0.1%  | 0         | 0.0%  | 5         | 0.4%  |
| mmu-mir-26b-5p | 1   | 74440898 | 74440918 | +      | 3' Indel | 3'       | 5        | 0.1%  | 0         | 0.0%  | 6         | 0.5%  |
| mmu-mir-26b-5p | 1   | 74440898 | 74440918 | +      | edit     | 1        | 0        | 0.0%  | 0         | 0.0%  | 0         | 0.0%  |
| mmu-mir-26b-5p | 1   | 74440898 | 74440918 | +      | edit     | 2        | 0        | 0.0%  | 0         | 0.0%  | 0         | 0.0%  |
| mmu-mir-26b-5p | 1   | 74440898 | 74440918 | +      | edit     | 3        | 0        | 0.0%  | 0         | 0.0%  | 0         | 0.0%  |
| mmu-mir-26b-5p | 1   | 74440898 | 74440918 | +      | edit     | 4        | 4        | 0.1%  | 3         | 0.1%  | 0         | 0.0%  |
| mmu-mir-26b-5p | 1   | 74440898 | 74440918 | +      | edit     | 5        | 0        | 0.0%  | 0         | 0.0%  | 0         | 0.0%  |
| mmu-mir-26b-5p | 1   | 74440898 | 74440918 | +      | edit     | 6        | 0        | 0.0%  | 0         | 0.0%  | 0         | 0.0%  |
| mmu-mir-26b-5p | 1   | 74440898 | 74440918 | +      | edit     | 7        | 0        | 0.0%  | 0         | 0.0%  | 0         | 0.0%  |
| mmu-mir-26b-5p | 1   | 74440898 | 74440918 | +      | edit     | 8        | 0        | 0.0%  | 0         | 0.0%  | 0         | 0.0%  |
| mmu-mir-26b-5p | 1   | 74440898 | 74440918 | +      | edit     | 9        | 0        | 0.0%  | 0         | 0.0%  | 0         | 0.0%  |
| mmu-mir-26b-5p | 1   | 74440898 | 74440918 | +      | edit     | 10       | 0        | 0.0%  | 0         | 0.0%  | 0         | 0.0%  |
| mmu-mir-26b-5p | 1   | 74440898 | 74440918 | +      | edit     | 11       | 0        | 0.0%  | 0         | 0.0%  | 0         | 0.0%  |
| mmu-mir-26b-5p | 1   | 74440898 | 74440918 | +      | edit     | 12       | 0        | 0.0%  | 0         | 0.0%  | 0         | 0.0%  |
| mmu-mir-26b-5p | 1   | 74440898 | 74440918 | +      | edit     | 13       | 0        | 0.0%  | 0         | 0.0%  | 0         | 0.0%  |
| mmu-mir-26b-5p | 1   | 74440898 | 74440918 | +      | edit     | 14       | 0        | 0.0%  | 0         | 0.0%  | 0         | 0.0%  |
| mmu-mir-26b-5p | 1   | 74440898 | 74440918 | +      | edit     | 15       | 0        | 0.0%  | 7         | 0.3%  | 0         | 0.0%  |
| mmu-mir-26b-5p | 1   | 74440898 | 74440918 | +      | edit     | 16       | 0        | 0.0%  | 0         | 0.0%  | 0         | 0.0%  |
| mmu-mir-26b-5p | 1   | 74440898 | 74440918 | +      | edit     | 17       | 0        | 0.0%  | 0         | 0.0%  | 0         | 0.0%  |
| mmu-mir-26b-5p | 1   | 74440898 | 74440918 | +      | edit     | 18       | 0        | 0.0%  | 0         | 0.0%  | 0         | 0.0%  |
| mmu-mir-26b-5p | 1   | 74440898 | 74440918 | +      | edit     | 19       | 0        | 0.0%  | 3         | 0.1%  | 0         | 0.0%  |
| mmu-mir-26b-5p | 1   | 74440898 | 74440918 | +      | edit     | 20       | 0        | 0.0%  | 0         | 0.0%  | 0         | 0.0%  |
| mmu-mir-26b-5p | 1   | 74440898 | 74440918 | +      | edit     | 21       | 0        | 0.0%  | 0         | 0.0%  | 0         | 0.0%  |
| mmu-mir-26b-5p | 1   | 74440898 | 74440918 | +      | edit     | 22       | 0        | 0.0%  | 0         | 0.0%  | 0         | 0.0%  |
| EDITED         |     |          |          |        |          |          | 12       | 0.4%  | 13        | 0.6%  | 11        | 1.0%  |
| CANONICAL      |     |          |          |        |          |          | 3401     | 99.6% | 2145      | 99.4% | 1141      | 99.0% |
| TOTAL          |     |          |          |        |          |          | 3413     |       | 2158      |       | 1152      |       |



| miRNA          | Chr | Start     | Stop      | Strand | Type | Position | P7 reads | P7%    | P10 reads | P10%  | P14 reads | P14%   |
|----------------|-----|-----------|-----------|--------|------|----------|----------|--------|-----------|-------|-----------|--------|
| mmu-mir-29c-3p | 1   | 196863794 | 196863815 | +      | edit | 1        | 0        | 0.0%   | 0         | 0.0%  | 0         | 0.0%   |
| mmu-mir-29c-3p | 1   | 196863794 | 196863815 | +      | edit | 2        | 0        | 0.0%   | 0         | 0.0%  | 0         | 0.0%   |
| mmu-mir-29c-3p | 1   | 196863794 | 196863815 | +      | edit | 3        | 0        | 0.0%   | 0         | 0.0%  | 0         | 0.0%   |
| mmu-mir-29c-3p | 1   | 196863794 | 196863815 | +      | edit | 4        | 0        | 0.0%   | 0         | 0.0%  | 0         | 0.0%   |
| mmu-mir-29c-3p | 1   | 196863794 | 196863815 | +      | edit | 5        | 0        | 0.0%   | 0         | 0.0%  | 0         | 0.0%   |
| mmu-mir-29c-3p | 1   | 196863794 | 196863815 | +      | edit | 6        | 0        | 0.0%   | 0         | 0.0%  | 0         | 0.0%   |
| mmu-mir-29c-3p | 1   | 196863794 | 196863815 | +      | edit | 7        | 0        | 0.0%   | 0         | 0.0%  | 0         | 0.0%   |
| mmu-mir-29c-3p | 1   | 196863794 | 196863815 | +      | edit | 8        | 0        | 0.0%   | 0         | 0.0%  | 0         | 0.0%   |
| mmu-mir-29c-3p | 1   | 196863794 | 196863815 | +      | edit | 9        | 0        | 0.0%   | 0         | 0.0%  | 0         | 0.0%   |
| mmu-mir-29c-3p | 1   | 196863794 | 196863815 | +      | edit | 10       | 0        | 0.0%   | 0         | 0.0%  | 0         | 0.0%   |
| mmu-mir-29c-3p | 1   | 196863794 | 196863815 | +      | edit | 11       | 0        | 0.0%   | 0         | 0.0%  | 0         | 0.0%   |
| mmu-mir-29c-3p | 1   | 196863794 | 196863815 | +      | edit | 12       | 0        | 0.0%   | 0         | 0.0%  | 0         | 0.0%   |
| mmu-mir-29c-3p | 1   | 196863794 | 196863815 | +      | edit | 13       | 0        | 0.0%   | 0         | 0.0%  | 0         | 0.0%   |
| mmu-mir-29c-3p | 1   | 196863794 | 196863815 | +      | edit | 14       | 0        | 0.0%   | 0         | 0.0%  | 0         | 0.0%   |
| mmu-mir-29c-3p | 1   | 196863794 | 196863815 | +      | edit | 15       | 0        | 0.0%   | 3         | 1.0%  | 0         | 0.0%   |
| mmu-mir-29c-3p | 1   | 196863794 | 196863815 | +      | edit | 16       | 0        | 0.0%   | 0         | 0.0%  | 0         | 0.0%   |
| mmu-mir-29c-3p | 1   | 196863794 | 196863815 | +      | edit | 17       | 0        | 0.0%   | 0         | 0.0%  | 0         | 0.0%   |
| mmu-mir-29c-3p | 1   | 196863794 | 196863815 | +      | edit | 18       | 0        | 0.0%   | 0         | 0.0%  | 0         | 0.0%   |
| mmu-mir-29c-3p | 1   | 196863794 | 196863815 | +      | edit | 19       | 0        | 0.0%   | 0         | 0.0%  | 0         | 0.0%   |
| mmu-mir-29c-3p | 1   | 196863794 | 196863815 | +      | edit | 20       | 0        | 0.0%   | 0         | 0.0%  | 0         | 0.0%   |
| mmu-mir-29c-3p | 1   | 196863794 | 196863815 | +      | edit | 21       | 0        | 0.0%   | 0         | 0.0%  | 0         | 0.0%   |
| mmu-mir-29c-3p | 1   | 196863794 | 196863815 | +      | edit | 22       | 0        | 0.0%   | 0         | 0.0%  | 0         | 0.0%   |
| EDITED         |     |           |           |        |      |          | 0        | 0.0%   | 3         | 1.0%  | 0         | 0.0%   |
| CANONICAL      |     |           |           |        |      |          | 188      | 100.0% | 293       | 99.0% | 248       | 100.0% |
| TOTAL          |     |           |           |        |      |          | 188      |        | 296       |       | 248       |        |

| miRNA          | Chr | Start    | Stop     | Strand | Type | Position | P7 reads | P7%   | P10 reads | P10%   | P14 reads | P14%  |
|----------------|-----|----------|----------|--------|------|----------|----------|-------|-----------|--------|-----------|-------|
| mmu-mir-30a-3p | 1   | 23279154 | 23279175 | +      | edit | 1        | 0        | 0.0%  | 0         | 0.0%   | 0         | 0.0%  |
| mmu-mir-30a-3p | 1   | 23279154 | 23279175 | +      | edit | 2        | 0        | 0.0%  | 0         | 0.0%   | 0         | 0.0%  |
| mmu-mir-30a-3p | 1   | 23279154 | 23279175 | +      | edit | 3        | 0        | 0.0%  | 0         | 0.0%   | 0         | 0.0%  |
| mmu-mir-30a-3p | 1   | 23279154 | 23279175 | +      | edit | 4        | 0        | 0.0%  | 0         | 0.0%   | 0         | 0.0%  |
| mmu-mir-30a-3p | 1   | 23279154 | 23279175 | +      | edit | 5        | 0        | 0.0%  | 0         | 0.0%   | 0         | 0.0%  |
| mmu-mir-30a-3p | 1   | 23279154 | 23279175 | +      | edit | 6        | 0        | 0.0%  | 0         | 0.0%   | 0         | 0.0%  |
| mmu-mir-30a-3p | 1   | 23279154 | 23279175 | +      | edit | 7        | 0        | 0.0%  | 0         | 0.0%   | 0         | 0.0%  |
| mmu-mir-30a-3p | 1   | 23279154 | 23279175 | +      | edit | 8        | 0        | 0.0%  | 0         | 0.0%   | 0         | 0.0%  |
| mmu-mir-30a-3p | 1   | 23279154 | 23279175 | +      | edit | 9        | 0        | 0.0%  | 0         | 0.0%   | 0         | 0.0%  |
| mmu-mir-30a-3p | 1   | 23279154 | 23279175 | +      | edit | 10       | 0        | 0.0%  | 0         | 0.0%   | 0         | 0.0%  |
| mmu-mir-30a-3p | 1   | 23279154 | 23279175 | +      | edit | 11       | 0        | 0.0%  | 0         | 0.0%   | 0         | 0.0%  |
| mmu-mir-30a-3p | 1   | 23279154 | 23279175 | +      | edit | 12       | 0        | 0.0%  | 0         | 0.0%   | 0         | 0.0%  |
| mmu-mir-30a-3p | 1   | 23279154 | 23279175 | +      | edit | 13       | 0        | 0.0%  | 0         | 0.0%   | 0         | 0.0%  |
| mmu-mir-30a-3p | 1   | 23279154 | 23279175 | +      | edit | 14       | 0        | 0.0%  | 0         | 0.0%   | 0         | 0.0%  |
| mmu-mir-30a-3p | 1   | 23279154 | 23279175 | +      | edit | 15       | 0        | 0.0%  | 0         | 0.0%   | 9         | 0.6%  |
| mmu-mir-30a-3p | 1   | 23279154 | 23279175 | +      | edit | 16       | 0        | 0.0%  | 0         | 0.0%   | 0         | 0.0%  |
| mmu-mir-30a-3p | 1   | 23279154 | 23279175 | +      | edit | 17       | 0        | 0.0%  | 0         | 0.0%   | 0         | 0.0%  |
| mmu-mir-30a-3p | 1   | 23279154 | 23279175 | +      | edit | 18       | 0        | 0.0%  | 0         | 0.0%   | 0         | 0.0%  |
| mmu-mir-30a-3p | 1   | 23279154 | 23279175 | +      | edit | 19       | 8        | 0.5%  | 0         | 0.0%   | 16        | 1.0%  |
| mmu-mir-30a-3p | 1   | 23279154 | 23279175 | +      | edit | 20       | 0        | 0.0%  | 0         | 0.0%   | 0         | 0.0%  |
| mmu-mir-30a-3p | 1   | 23279154 | 23279175 | +      | edit | 21       | 0        | 0.0%  | 0         | 0.0%   | 0         | 0.0%  |
| mmu-mir-30a-3p | 1   | 23279154 | 23279175 | +      | edit | 22       | 0        | 0.0%  | 0         | 0.0%   | 0         | 0.0%  |
| EDITED         |     |          |          |        |      |          | 8        | 0.5%  | 0         | 0.0%   | 25        | 1.6%  |
| CANONICAL      |     |          |          |        |      |          | 1583     | 99.5% | 907       | 100.0% | 1532      | 98.4% |
| TOTAL          |     |          |          |        |      |          | 1591     |       | 907       |        | 1557      |       |

| miRNA          | Chr | Start    | Stop     | Strand | Type    | Position | P7 reads | P7%   | P10 reads | P10%  | P14 reads | P14%  |
|----------------|-----|----------|----------|--------|---------|----------|----------|-------|-----------|-------|-----------|-------|
| mmu-mir-30a-5p | 1   | 23279113 | 23279134 | +      | 3' Edit | 3'       | 6        | 0.1%  | 0         | 0.0%  | 7         | 0.1%  |
| mmu-mir-30a-5p | 1   | 23279113 | 23279134 | +      | edit    | 1        | 0        | 0.0%  | 0         | 0.0%  | 0         | 0.0%  |
| mmu-mir-30a-5p | 1   | 23279113 | 23279134 | +      | edit    | 2        | 0        | 0.0%  | 0         | 0.0%  | 0         | 0.0%  |
| mmu-mir-30a-5p | 1   | 23279113 | 23279134 | +      | edit    | 3        | 0        | 0.0%  | 0         | 0.0%  | 0         | 0.0%  |
| mmu-mir-30a-5p | 1   | 23279113 | 23279134 | +      | edit    | 4        | 0        | 0.0%  | 4         | 0.1%  | 4         | 0.1%  |
| mmu-mir-30a-5p | 1   | 23279113 | 23279134 | +      | edit    | 5        | 0        | 0.0%  | 0         | 0.0%  | 0         | 0.0%  |
| mmu-mir-30a-5p | 1   | 23279113 | 23279134 | +      | edit    | 6        | 0        | 0.0%  | 4         | 0.1%  | 0         | 0.0%  |
| mmu-mir-30a-5p | 1   | 23279113 | 23279134 | +      | edit    | 7        | 0        | 0.0%  | 0         | 0.0%  | 0         | 0.0%  |
| mmu-mir-30a-5p | 1   | 23279113 | 23279134 | +      | edit    | 8        | 3        | 0.0%  | 0         | 0.0%  | 0         | 0.0%  |
| mmu-mir-30a-5p | 1   | 23279113 | 23279134 | +      | edit    | 9        | 0        | 0.0%  | 0         | 0.0%  | 0         | 0.0%  |
| mmu-mir-30a-5p | 1   | 23279113 | 23279134 | +      | edit    | 10       | 0        | 0.0%  | 0         | 0.0%  | 0         | 0.0%  |
| mmu-mir-30a-5p | 1   | 23279113 | 23279134 | +      | edit    | 11       | 0        | 0.0%  | 0         | 0.0%  | 0         | 0.0%  |
| mmu-mir-30a-5p | 1   | 23279113 | 23279134 | +      | edit    | 12       | 15       | 0.2%  | 4         | 0.1%  | 0         | 0.0%  |
| mmu-mir-30a-5p | 1   | 23279113 | 23279134 | +      | edit    | 13       | 0        | 0.0%  | 0         | 0.0%  | 0         | 0.0%  |
| mmu-mir-30a-5p | 1   | 23279113 | 23279134 | +      | edit    | 14       | 0        | 0.0%  | 0         | 0.0%  | 0         | 0.0%  |
| mmu-mir-30a-5p | 1   | 23279113 | 23279134 | +      | edit    | 15       | 11       | 0.1%  | 60        | 1.0%  | 10        | 0.2%  |
| mmu-mir-30a-5p | 1   | 23279113 | 23279134 | +      | edit    | 16       | 0        | 0.0%  | 0         | 0.0%  | 0         | 0.0%  |
| mmu-mir-30a-5p | 1   | 23279113 | 23279134 | +      | edit    | 17       | 11       | 0.1%  | 0         | 0.0%  | 6         | 0.1%  |
| mmu-mir-30a-5p | 1   | 23279113 | 23279134 | +      | edit    | 18       | 0        | 0.0%  | 0         | 0.0%  | 0         | 0.0%  |
| mmu-mir-30a-5p | 1   | 23279113 | 23279134 | +      | edit    | 19       | 19       | 0.2%  | 16        | 0.3%  | 7         | 0.1%  |
| mmu-mir-30a-5p | 1   | 23279113 | 23279134 | +      | edit    | 20       | 0        | 0.0%  | 0         | 0.0%  | 0         | 0.0%  |
| mmu-mir-30a-5p | 1   | 23279113 | 23279134 | +      | edit    | 21       | 12       | 0.2%  | 56        | 0.9%  | 8         | 0.1%  |
| mmu-mir-30a-5p | 1   | 23279113 | 23279134 | +      | edit    | 22       | 0        | 0.0%  | 0         | 0.0%  | 0         | 0.0%  |
| EDITED         |     |          |          |        |         |          | 77       | 1.0%  | 143       | 2.4%  | 42        | 0.7%  |
| CANONICAL      |     |          |          |        |         |          | 7565     | 99.0% | 5788      | 97.6% | 5882      | 99.3% |
| TOTAL          |     |          |          |        |         |          | 7642     |       | 5931      |       | 5924      |       |

| miRNA            | Chr | Start     | Stop      | Strand | Type | Position | P7 reads | P7%    | P10 reads | P10%  | P14 reads | P14%   |
|------------------|-----|-----------|-----------|--------|------|----------|----------|--------|-----------|-------|-----------|--------|
| mmu-mir-30c-1-5p | 4   | 120442189 | 120442211 | -      | edit | 1        | 0        | 0.0%   | 0         | 0.0%  | 0         | 0.0%   |
| mmu-mir-30c-1-5p | 4   | 120442189 | 120442211 | -      | edit | 2        | 0        | 0.0%   | 0         | 0.0%  | 0         | 0.0%   |
| mmu-mir-30c-1-5p | 4   | 120442189 | 120442211 | -      | edit | 3        | 0        | 0.0%   | 0         | 0.0%  | 0         | 0.0%   |
| mmu-mir-30c-1-5p | 4   | 120442189 | 120442211 | -      | edit | 4        | 0        | 0.0%   | 0         | 0.0%  | 0         | 0.0%   |
| mmu-mir-30c-1-5p | 4   | 120442189 | 120442211 | -      | edit | 5        | 0        | 0.0%   | 0         | 0.0%  | 0         | 0.0%   |
| mmu-mir-30c-1-5p | 4   | 120442189 | 120442211 | -      | edit | 6        | 0        | 0.0%   | 0         | 0.0%  | 0         | 0.0%   |
| mmu-mir-30c-1-5p | 4   | 120442189 | 120442211 | -      | edit | 7        | 0        | 0.0%   | 0         | 0.0%  | 0         | 0.0%   |
| mmu-mir-30c-1-5p | 4   | 120442189 | 120442211 | -      | edit | 8        | 0        | 0.0%   | 0         | 0.0%  | 0         | 0.0%   |
| mmu-mir-30c-1-5p | 4   | 120442189 | 120442211 | -      | edit | 9        | 0        | 0.0%   | 0         | 0.0%  | 0         | 0.0%   |
| mmu-mir-30c-1-5p | 4   | 120442189 | 120442211 | -      | edit | 10       | 0        | 0.0%   | 0         | 0.0%  | 0         | 0.0%   |
| mmu-mir-30c-1-5p | 4   | 120442189 | 120442211 | -      | edit | 11       | 0        | 0.0%   | 0         | 0.0%  | 0         | 0.0%   |
| mmu-mir-30c-1-5p | 4   | 120442189 | 120442211 | -      | edit | 12       | 0        | 0.0%   | 0         | 0.0%  | 0         | 0.0%   |
| mmu-mir-30c-1-5p | 4   | 120442189 | 120442211 | -      | edit | 13       | 0        | 0.0%   | 0         | 0.0%  | 0         | 0.0%   |
| mmu-mir-30c-1-5p | 4   | 120442189 | 120442211 | -      | edit | 14       | 0        | 0.0%   | 0         | 0.0%  | 0         | 0.0%   |
| mmu-mir-30c-1-5p | 4   | 120442189 | 120442211 | -      | edit | 15       | 0        | 0.0%   | 0         | 0.0%  | 0         | 0.0%   |
| mmu-mir-30c-1-5p | 4   | 120442189 | 120442211 | -      | edit | 16       | 0        | 0.0%   | 0         | 0.0%  | 0         | 0.0%   |
| mmu-mir-30c-1-5p | 4   | 120442189 | 120442211 | -      | edit | 17       | 0        | 0.0%   | 0         | 0.0%  | 0         | 0.0%   |
| mmu-mir-30c-1-5p | 4   | 120442189 | 120442211 | -      | edit | 18       | 0        | 0.0%   | 0         | 0.0%  | 0         | 0.0%   |
| mmu-mir-30c-1-5p | 4   | 120442189 | 120442211 | -      | edit | 19       | 0        | 0.0%   | 0         | 0.0%  | 0         | 0.0%   |
| mmu-mir-30c-1-5p | 4   | 120442189 | 120442211 | -      | edit | 20       | 0        | 0.0%   | 0         | 0.0%  | 0         | 0.0%   |
| mmu-mir-30c-1-5p | 4   | 120442189 | 120442211 | -      | edit | 21       | 0        | 0.0%   | 10        | 3.0%  | 0         | 0.0%   |
| mmu-mir-30c-1-5p | 4   | 120442189 | 120442211 | -      | edit | 22       | 0        | 0.0%   | 0         | 0.0%  | 0         | 0.0%   |
| EDITED           |     |           |           |        |      |          | 0        | 0.0%   | 10        | 3.0%  | 0         | 0.0%   |
| CANONICAL        |     |           |           |        |      |          | 323      | 100.0% | 306       | 97.0% | 193       | 100.0% |
| TOTAL            |     |           |           |        |      |          | 323      |        | 316       |       | 193       |        |

| miRNA            | Chr | Start    | Stop     | Strand | Type | Position | P7 reads | P7%   | P10 reads | P10%  | P14 reads | P14%  |
|------------------|-----|----------|----------|--------|------|----------|----------|-------|-----------|-------|-----------|-------|
| mmu-mir-30c-2-3p | 1   | 23298593 | 23298614 | +      | edit | 1        | 0        | 0.0%  | 0         | 0.0%  | 0         | 0.0%  |
| mmu-mir-30c-2-3p | 1   | 23298593 | 23298614 | +      | edit | 2        | 0        | 0.0%  | 0         | 0.0%  | 0         | 0.0%  |
| mmu-mir-30c-2-3p | 1   | 23298593 | 23298614 | +      | edit | 3        | 0        | 0.0%  | 0         | 0.0%  | 0         | 0.0%  |
| mmu-mir-30c-2-3p | 1   | 23298593 | 23298614 | +      | edit | 4        | 0        | 0.0%  | 0         | 0.0%  | 0         | 0.0%  |
| mmu-mir-30c-2-3p | 1   | 23298593 | 23298614 | +      | edit | 5        | 0        | 0.0%  | 0         | 0.0%  | 0         | 0.0%  |
| mmu-mir-30c-2-3p | 1   | 23298593 | 23298614 | +      | edit | 6        | 0        | 0.0%  | 0         | 0.0%  | 0         | 0.0%  |
| mmu-mir-30c-2-3p | 1   | 23298593 | 23298614 | +      | edit | 7        | 0        | 0.0%  | 0         | 0.0%  | 0         | 0.0%  |
| mmu-mir-30c-2-3p | 1   | 23298593 | 23298614 | +      | edit | 8        | 0        | 0.0%  | 0         | 0.0%  | 0         | 0.0%  |
| mmu-mir-30c-2-3p | 1   | 23298593 | 23298614 | +      | edit | 9        | 0        | 0.0%  | 0         | 0.0%  | 0         | 0.0%  |
| mmu-mir-30c-2-3p | 1   | 23298593 | 23298614 | +      | edit | 10       | 0        | 0.0%  | 0         | 0.0%  | 0         | 0.0%  |
| mmu-mir-30c-2-3p | 1   | 23298593 | 23298614 | +      | edit | 11       | 0        | 0.0%  | 0         | 0.0%  | 0         | 0.0%  |
| mmu-mir-30c-2-3p | 1   | 23298593 | 23298614 | +      | edit | 12       | 0        | 0.0%  | 0         | 0.0%  | 0         | 0.0%  |
| mmu-mir-30c-2-3p | 1   | 23298593 | 23298614 | +      | edit | 13       | 0        | 0.0%  | 0         | 0.0%  | 0         | 0.0%  |
| mmu-mir-30c-2-3p | 1   | 23298593 | 23298614 | +      | edit | 14       | 0        | 0.0%  | 0         | 0.0%  | 0         | 0.0%  |
| mmu-mir-30c-2-3p | 1   | 23298593 | 23298614 | +      | edit | 15       | 0        | 0.0%  | 0         | 0.0%  | 0         | 0.0%  |
| mmu-mir-30c-2-3p | 1   | 23298593 | 23298614 | +      | edit | 16       | 0        | 0.0%  | 0         | 0.0%  | 0         | 0.0%  |
| mmu-mir-30c-2-3p | 1   | 23298593 | 23298614 | +      | edit | 17       | 0        | 0.0%  | 0         | 0.0%  | 0         | 0.0%  |
| mmu-mir-30c-2-3p | 1   | 23298593 | 23298614 | +      | edit | 18       | 0        | 0.0%  | 0         | 0.0%  | 0         | 0.0%  |
| mmu-mir-30c-2-3p | 1   | 23298593 | 23298614 | +      | edit | 19       | 5        | 0.9%  | 3         | 1.0%  | 3         | 1.0%  |
| mmu-mir-30c-2-3p | 1   | 23298593 | 23298614 | +      | edit | 20       | 0        | 0.0%  | 0         | 0.0%  | 0         | 0.0%  |
| mmu-mir-30c-2-3p | 1   | 23298593 | 23298614 | +      | edit | 21       | 0        | 0.0%  | 10        | 3.2%  | 0         | 0.0%  |
| mmu-mir-30c-2-3p | 1   | 23298593 | 23298614 | +      | edit | 22       | 0        | 0.0%  | 0         | 0.0%  | 0         | 0.0%  |
| EDITED           |     |          |          |        |      |          | 5        | 0.9%  | 13        | 4.1%  | 3         | 1.0%  |
| CANONICAL        |     |          |          |        |      |          | 487      | 99.1% | 289       | 95.9% | 289       | 99.0% |
| TOTAL            |     |          |          |        |      |          | 492      |       | 302       |       | 292       |       |



| miRNA          | Chr | Start    | Stop     | Strand | Type    | Position | P7 reads | P7%   | P10 reads | P10%  | P14 reads | P14%  |
|----------------|-----|----------|----------|--------|---------|----------|----------|-------|-----------|-------|-----------|-------|
| mmu-mir-30d-5p | 15  | 68172819 | 68172840 | -      | 5' Edit | 5'       | 9        | 0.1%  | 0         | 0.0%  | 13        | 0.4%  |
| mmu-mir-30d-5p | 15  | 68172819 | 68172840 | -      | edit    | 1        | 0        | 0.0%  | 0         | 0.0%  | 0         | 0.0%  |
| mmu-mir-30d-5p | 15  | 68172819 | 68172840 | -      | edit    | 2        | 0        | 0.0%  | 0         | 0.0%  | 0         | 0.0%  |
| mmu-mir-30d-5p | 15  | 68172819 | 68172840 | -      | edit    | 3        | 0        | 0.0%  | 0         | 0.0%  | 0         | 0.0%  |
| mmu-mir-30d-5p | 15  | 68172819 | 68172840 | -      | edit    | 4        | 0        | 0.0%  | 0         | 0.0%  | 0         | 0.0%  |
| mmu-mir-30d-5p | 15  | 68172819 | 68172840 | -      | edit    | 5        | 0        | 0.0%  | 0         | 0.0%  | 0         | 0.0%  |
| mmu-mir-30d-5p | 15  | 68172819 | 68172840 | -      | edit    | 6        | 0        | 0.0%  | 0         | 0.0%  | 0         | 0.0%  |
| mmu-mir-30d-5p | 15  | 68172819 | 68172840 | -      | edit    | 7        | 0        | 0.0%  | 0         | 0.0%  | 0         | 0.0%  |
| mmu-mir-30d-5p | 15  | 68172819 | 68172840 | -      | edit    | 8        | 4        | 0.1%  | 0         | 0.0%  | 0         | 0.0%  |
| mmu-mir-30d-5p | 15  | 68172819 | 68172840 | -      | edit    | 9        | 0        | 0.0%  | 0         | 0.0%  | 0         | 0.0%  |
| mmu-mir-30d-5p | 15  | 68172819 | 68172840 | -      | edit    | 10       | 0        | 0.0%  | 0         | 0.0%  | 3         | 0.1%  |
| mmu-mir-30d-5p | 15  | 68172819 | 68172840 | -      | edit    | 11       | 0        | 0.0%  | 0         | 0.0%  | 0         | 0.0%  |
| mmu-mir-30d-5p | 15  | 68172819 | 68172840 | -      | edit    | 12       | 0        | 0.0%  | 0         | 0.0%  | 0         | 0.0%  |
| mmu-mir-30d-5p | 15  | 68172819 | 68172840 | -      | edit    | 13       | 8        | 0.1%  | 8         | 0.2%  | 12        | 0.4%  |
| mmu-mir-30d-5p | 15  | 68172819 | 68172840 | -      | edit    | 14       | 0        | 0.0%  | 0         | 0.0%  | 0         | 0.0%  |
| mmu-mir-30d-5p | 15  | 68172819 | 68172840 | -      | edit    | 15       | 34       | 0.5%  | 119       | 2.2%  | 20        | 0.6%  |
| mmu-mir-30d-5p | 15  | 68172819 | 68172840 | -      | edit    | 16       | 6        | 0.1%  | 9         | 0.2%  | 6         | 0.2%  |
| mmu-mir-30d-5p | 15  | 68172819 | 68172840 | -      | edit    | 17       | 52       | 0.7%  | 9         | 0.2%  | 29        | 0.8%  |
| mmu-mir-30d-5p | 15  | 68172819 | 68172840 | -      | edit    | 18       | 5        | 0.1%  | 0         | 0.0%  | 0         | 0.0%  |
| mmu-mir-30d-5p | 15  | 68172819 | 68172840 | -      | edit    | 19       | 20       | 0.3%  | 14        | 0.3%  | 11        | 0.3%  |
| mmu-mir-30d-5p | 15  | 68172819 | 68172840 | -      | edit    | 20       | 5        | 0.1%  | 20        | 0.4%  | 0         | 0.0%  |
| mmu-mir-30d-5p | 15  | 68172819 | 68172840 | -      | edit    | 21       | 24       | 0.3%  | 90        | 1.7%  | 13        | 0.4%  |
| mmu-mir-30d-5p | 15  | 68172819 | 68172840 | -      | edit    | 22       | 0        | 0.0%  | 0         | 0.0%  | 0         | 0.0%  |
| EDITED         |     |          |          |        |         |          | 166      | 2.3%  | 269       | 5.1%  | 106       | 3.1%  |
| CANONICAL      |     |          |          |        |         |          | 7116     | 97.7% | 5031      | 94.9% | 3302      | 96.9% |
| TOTAL          |     |          |          |        |         |          | 7282     |       | 5300      |       | 3408      |       |

| miRNA          | Chr | Start     | Stop      | Strand | Type | Position | P7 reads | P7%   | P10 reads | P10%   | P14 reads | P14%  |
|----------------|-----|-----------|-----------|--------|------|----------|----------|-------|-----------|--------|-----------|-------|
| mmu-mir-30e-3p | 4   | 120445223 | 120445244 | -      | edit | 1        | 0        | 0.0%  | 0         | 0.0%   | 0         | 0.0%  |
| mmu-mir-30e-3p | 4   | 120445223 | 120445244 | -      | edit | 2        | 0        | 0.0%  | 0         | 0.0%   | 0         | 0.0%  |
| mmu-mir-30e-3p | 4   | 120445223 | 120445244 | -      | edit | 3        | 0        | 0.0%  | 0         | 0.0%   | 0         | 0.0%  |
| mmu-mir-30e-3p | 4   | 120445223 | 120445244 | -      | edit | 4        | 0        | 0.0%  | 0         | 0.0%   | 0         | 0.0%  |
| mmu-mir-30e-3p | 4   | 120445223 | 120445244 | -      | edit | 5        | 0        | 0.0%  | 0         | 0.0%   | 0         | 0.0%  |
| mmu-mir-30e-3p | 4   | 120445223 | 120445244 | -      | edit | 6        | 0        | 0.0%  | 0         | 0.0%   | 0         | 0.0%  |
| mmu-mir-30e-3p | 4   | 120445223 | 120445244 | -      | edit | 7        | 0        | 0.0%  | 0         | 0.0%   | 0         | 0.0%  |
| mmu-mir-30e-3p | 4   | 120445223 | 120445244 | -      | edit | 8        | 0        | 0.0%  | 0         | 0.0%   | 0         | 0.0%  |
| mmu-mir-30e-3p | 4   | 120445223 | 120445244 | -      | edit | 9        | 0        | 0.0%  | 0         | 0.0%   | 0         | 0.0%  |
| mmu-mir-30e-3p | 4   | 120445223 | 120445244 | -      | edit | 10       | 0        | 0.0%  | 0         | 0.0%   | 0         | 0.0%  |
| mmu-mir-30e-3p | 4   | 120445223 | 120445244 | -      | edit | 11       | 0        | 0.0%  | 0         | 0.0%   | 0         | 0.0%  |
| mmu-mir-30e-3p | 4   | 120445223 | 120445244 | -      | edit | 12       | 0        | 0.0%  | 0         | 0.0%   | 0         | 0.0%  |
| mmu-mir-30e-3p | 4   | 120445223 | 120445244 | -      | edit | 13       | 0        | 0.0%  | 0         | 0.0%   | 0         | 0.0%  |
| mmu-mir-30e-3p | 4   | 120445223 | 120445244 | -      | edit | 14       | 0        | 0.0%  | 0         | 0.0%   | 0         | 0.0%  |
| mmu-mir-30e-3p | 4   | 120445223 | 120445244 | -      | edit | 15       | 7        | 0.5%  | 0         | 0.0%   | 0         | 0.0%  |
| mmu-mir-30e-3p | 4   | 120445223 | 120445244 | -      | edit | 16       | 0        | 0.0%  | 0         | 0.0%   | 0         | 0.0%  |
| mmu-mir-30e-3p | 4   | 120445223 | 120445244 | -      | edit | 17       | 0        | 0.0%  | 0         | 0.0%   | 0         | 0.0%  |
| mmu-mir-30e-3p | 4   | 120445223 | 120445244 | -      | edit | 18       | 0        | 0.0%  | 0         | 0.0%   | 0         | 0.0%  |
| mmu-mir-30e-3p | 4   | 120445223 | 120445244 | -      | edit | 19       | 5        | 0.4%  | 0         | 0.0%   | 8         | 1.3%  |
| mmu-mir-30e-3p | 4   | 120445223 | 120445244 | -      | edit | 20       | 0        | 0.0%  | 0         | 0.0%   | 0         | 0.0%  |
| mmu-mir-30e-3p | 4   | 120445223 | 120445244 | -      | edit | 21       | 0        | 0.0%  | 0         | 0.0%   | 0         | 0.0%  |
| mmu-mir-30e-3p | 4   | 120445223 | 120445244 | -      | edit | 22       | 0        | 0.0%  | 0         | 0.0%   | 0         | 0.0%  |
| EDITED         |     |           |           |        |      |          | 11       | 0.9%  | 0         | 0.0%   | 8         | 1.3%  |
| CANONICAL      |     |           |           |        |      |          | 1217     | 99.1% | 481       | 100.0% | 587       | 98.7% |
| TOTAL          |     |           |           |        |      |          | 1228     |       | 481       |        | 595       |       |

| miRNA          | Chr | Start     | Stop      | Strand | Type | Position | P7 reads | P7%   | P10 reads | P10%  | P14 reads | P14%  |
|----------------|-----|-----------|-----------|--------|------|----------|----------|-------|-----------|-------|-----------|-------|
| mmu-mir-30e-5p | 4   | 120445265 | 120445286 | -      | edit | 1        | 0        | 0.0%  | 0         | 0.0%  | 0         | 0.0%  |
| mmu-mir-30e-5p | 4   | 120445265 | 120445286 | -      | edit | 2        | 0        | 0.0%  | 0         | 0.0%  | 0         | 0.0%  |
| mmu-mir-30e-5p | 4   | 120445265 | 120445286 | -      | edit | 3        | 0        | 0.0%  | 0         | 0.0%  | 0         | 0.0%  |
| mmu-mir-30e-5p | 4   | 120445265 | 120445286 | -      | edit | 4        | 0        | 0.0%  | 0         | 0.0%  | 0         | 0.0%  |
| mmu-mir-30e-5p | 4   | 120445265 | 120445286 | -      | edit | 5        | 0        | 0.0%  | 0         | 0.0%  | 0         | 0.0%  |
| mmu-mir-30e-5p | 4   | 120445265 | 120445286 | -      | edit | 6        | 0        | 0.0%  | 0         | 0.0%  | 0         | 0.0%  |
| mmu-mir-30e-5p | 4   | 120445265 | 120445286 | -      | edit | 7        | 0        | 0.0%  | 0         | 0.0%  | 0         | 0.0%  |
| mmu-mir-30e-5p | 4   | 120445265 | 120445286 | -      | edit | 8        | 0        | 0.0%  | 0         | 0.0%  | 0         | 0.0%  |
| mmu-mir-30e-5p | 4   | 120445265 | 120445286 | -      | edit | 9        | 0        | 0.0%  | 0         | 0.0%  | 0         | 0.0%  |
| mmu-mir-30e-5p | 4   | 120445265 | 120445286 | -      | edit | 10       | 0        | 0.0%  | 0         | 0.0%  | 0         | 0.0%  |
| mmu-mir-30e-5p | 4   | 120445265 | 120445286 | -      | edit | 11       | 0        | 0.0%  | 0         | 0.0%  | 0         | 0.0%  |
| mmu-mir-30e-5p | 4   | 120445265 | 120445286 | -      | edit | 12       | 0        | 0.0%  | 0         | 0.0%  | 0         | 0.0%  |
| mmu-mir-30e-5p | 4   | 120445265 | 120445286 | -      | edit | 13       | 4        | 0.2%  | 0         | 0.0%  | 3         | 0.2%  |
| mmu-mir-30e-5p | 4   | 120445265 | 120445286 | -      | edit | 14       | 0        | 0.0%  | 0         | 0.0%  | 0         | 0.0%  |
| mmu-mir-30e-5p | 4   | 120445265 | 120445286 | -      | edit | 15       | 3        | 0.1%  | 6         | 0.4%  | 0         | 0.0%  |
| mmu-mir-30e-5p | 4   | 120445265 | 120445286 | -      | edit | 16       | 0        | 0.0%  | 0         | 0.0%  | 0         | 0.0%  |
| mmu-mir-30e-5p | 4   | 120445265 | 120445286 | -      | edit | 17       | 4        | 0.1%  | 0         | 0.0%  | 0         | 0.0%  |
| mmu-mir-30e-5p | 4   | 120445265 | 120445286 | -      | edit | 18       | 0        | 0.0%  | 0         | 0.0%  | 0         | 0.0%  |
| mmu-mir-30e-5p | 4   | 120445265 | 120445286 | -      | edit | 19       | 3        | 0.1%  | 0         | 0.0%  | 0         | 0.0%  |
| mmu-mir-30e-5p | 4   | 120445265 | 120445286 | -      | edit | 20       | 3        | 0.1%  | 0         | 0.0%  | 0         | 0.0%  |
| mmu-mir-30e-5p | 4   | 120445265 | 120445286 | -      | edit | 21       | 4        | 0.2%  | 13        | 0.8%  | 0         | 0.0%  |
| mmu-mir-30e-5p | 4   | 120445265 | 120445286 | -      | edit | 22       | 0        | 0.0%  | 0         | 0.0%  | 0         | 0.0%  |
| EDITED         |     |           |           |        |      |          | 21       | 0.8%  | 19        | 1.1%  | 3         | 0.2%  |
| CANONICAL      |     |           |           |        |      |          | 2605     | 99.2% | 1694      | 98.9% | 1211      | 99.8% |
| TOTAL          |     |           |           |        |      |          | 2626     |       | 1713      |       | 1214      |       |

| miRNA          | Chr | Start    | Stop     | Strand | Type | Position | P7 reads | P7%   | P10 reads | P10%  | P14 reads | P14%  |
|----------------|-----|----------|----------|--------|------|----------|----------|-------|-----------|-------|-----------|-------|
| mmu-mir-34b-5p | 9   | 50911715 | 50911737 | -      | edit | 1        | 0        | 0.0%  | 0         | 0.0%  | 0         | 0.0%  |
| mmu-mir-34b-5p | 9   | 50911715 | 50911737 | -      | edit | 2        | 0        | 0.0%  | 0         | 0.0%  | 0         | 0.0%  |
| mmu-mir-34b-5p | 9   | 50911715 | 50911737 | -      | edit | 3        | 0        | 0.0%  | 0         | 0.0%  | 0         | 0.0%  |
| mmu-mir-34b-5p | 9   | 50911715 | 50911737 | -      | edit | 4        | 0        | 0.0%  | 0         | 0.0%  | 0         | 0.0%  |
| mmu-mir-34b-5p | 9   | 50911715 | 50911737 | -      | edit | 5        | 0        | 0.0%  | 0         | 0.0%  | 0         | 0.0%  |
| mmu-mir-34b-5p | 9   | 50911715 | 50911737 | -      | edit | 6        | 0        | 0.0%  | 0         | 0.0%  | 0         | 0.0%  |
| mmu-mir-34b-5p | 9   | 50911715 | 50911737 | -      | edit | 7        | 0        | 0.0%  | 0         | 0.0%  | 0         | 0.0%  |
| mmu-mir-34b-5p | 9   | 50911715 | 50911737 | -      | edit | 8        | 0        | 0.0%  | 0         | 0.0%  | 0         | 0.0%  |
| mmu-mir-34b-5p | 9   | 50911715 | 50911737 | -      | edit | 9        | 0        | 0.0%  | 0         | 0.0%  | 0         | 0.0%  |
| mmu-mir-34b-5p | 9   | 50911715 | 50911737 | -      | edit | 10       | 0        | 0.0%  | 0         | 0.0%  | 0         | 0.0%  |
| mmu-mir-34b-5p | 9   | 50911715 | 50911737 | -      | edit | 11       | 10       | 15.2% | 4         | 9.8%  | 77        | 12.9% |
| mmu-mir-34b-5p | 9   | 50911715 | 50911737 | -      | edit | 12       | 0        | 0.0%  | 0         | 0.0%  | 0         | 0.0%  |
| mmu-mir-34b-5p | 9   | 50911715 | 50911737 | -      | edit | 13       | 0        | 0.0%  | 0         | 0.0%  | 0         | 0.0%  |
| mmu-mir-34b-5p | 9   | 50911715 | 50911737 | -      | edit | 14       | 0        | 0.0%  | 0         | 0.0%  | 0         | 0.0%  |
| mmu-mir-34b-5p | 9   | 50911715 | 50911737 | -      | edit | 15       | 0        | 0.0%  | 0         | 0.0%  | 0         | 0.0%  |
| mmu-mir-34b-5p | 9   | 50911715 | 50911737 | -      | edit | 16       | 0        | 0.0%  | 0         | 0.0%  | 0         | 0.0%  |
| mmu-mir-34b-5p | 9   | 50911715 | 50911737 | -      | edit | 17       | 0        | 0.0%  | 0         | 0.0%  | 0         | 0.0%  |
| mmu-mir-34b-5p | 9   | 50911715 | 50911737 | -      | edit | 18       | 0        | 0.0%  | 0         | 0.0%  | 0         | 0.0%  |
| mmu-mir-34b-5p | 9   | 50911715 | 50911737 | -      | edit | 19       | 0        | 0.0%  | 0         | 0.0%  | 3         | 0.5%  |
| mmu-mir-34b-5p | 9   | 50911715 | 50911737 | -      | edit | 20       | 0        | 0.0%  | 0         | 0.0%  | 0         | 0.0%  |
| mmu-mir-34b-5p | 9   | 50911715 | 50911737 | -      | edit | 21       | 0        | 0.0%  | 0         | 0.0%  | 0         | 0.0%  |
| mmu-mir-34b-5p | 9   | 50911715 | 50911737 | -      | edit | 22       | 0        | 0.0%  | 0         | 0.0%  | 0         | 0.0%  |
| EDITED         |     |          |          |        |      |          | 10       | 15.2% | 4         | 9.8%  | 80        | 13.4% |
| CANONICAL      |     |          |          |        |      |          | 56       | 84.8% | 37        | 90.2% | 519       | 86.6% |
| TOTAL          |     |          |          |        |      |          | 66       |       | 41        |       | 599       |       |

| miRNA          | Chr | Start    | Stop     | Strand | Type     | Position | P7 reads | P7%   | P10 reads | P10%  | P14 reads | P14%  |
|----------------|-----|----------|----------|--------|----------|----------|----------|-------|-----------|-------|-----------|-------|
| mmu-mir-34c-5p | 9   | 50911181 | 50911203 | -      | 5' Edit  | 5'       | 0        | 0.0%  | 0         | 0.0%  | 4         | 0.0%  |
| mmu-mir-34c-5p | 9   | 50911181 | 50911203 | -      | 5' Indel | 5'       | 0        | 0.0%  | 0         | 0.0%  | 7         | 0.0%  |
| mmu-mir-34c-5p | 9   | 50911181 | 50911203 | -      | edit     | 1        | 0        | 0.0%  | 0         | 0.0%  | 0         | 0.0%  |
| mmu-mir-34c-5p | 9   | 50911181 | 50911203 | -      | edit     | 2        | 0        | 0.0%  | 0         | 0.0%  | 0         | 0.0%  |
| mmu-mir-34c-5p | 9   | 50911181 | 50911203 | -      | edit     | 3        | 0        | 0.0%  | 0         | 0.0%  | 0         | 0.0%  |
| mmu-mir-34c-5p | 9   | 50911181 | 50911203 | -      | edit     | 4        | 0        | 0.0%  | 0         | 0.0%  | 9         | 0.0%  |
| mmu-mir-34c-5p | 9   | 50911181 | 50911203 | -      | edit     | 5        | 0        | 0.0%  | 0         | 0.0%  | 9         | 0.0%  |
| mmu-mir-34c-5p | 9   | 50911181 | 50911203 | -      | edit     | 6        | 0        | 0.0%  | 0         | 0.0%  | 0         | 0.0%  |
| mmu-mir-34c-5p | 9   | 50911181 | 50911203 | -      | edit     | 7        | 0        | 0.0%  | 0         | 0.0%  | 0         | 0.0%  |
| mmu-mir-34c-5p | 9   | 50911181 | 50911203 | -      | edit     | 8        | 0        | 0.0%  | 0         | 0.0%  | 6         | 0.0%  |
| mmu-mir-34c-5p | 9   | 50911181 | 50911203 | -      | edit     | 9        | 3        | 0.1%  | 3         | 0.1%  | 67        | 0.2%  |
| mmu-mir-34c-5p | 9   | 50911181 | 50911203 | -      | edit     | 10       | 0        | 0.0%  | 0         | 0.0%  | 4         | 0.0%  |
| mmu-mir-34c-5p | 9   | 50911181 | 50911203 | -      | edit     | 11       | 0        | 0.0%  | 0         | 0.0%  | 0         | 0.0%  |
| mmu-mir-34c-5p | 9   | 50911181 | 50911203 | -      | edit     | 12       | 0        | 0.0%  | 0         | 0.0%  | 0         | 0.0%  |
| mmu-mir-34c-5p | 9   | 50911181 | 50911203 | -      | edit     | 13       | 0        | 0.0%  | 0         | 0.0%  | 15        | 0.1%  |
| mmu-mir-34c-5p | 9   | 50911181 | 50911203 | -      | edit     | 14       | 0        | 0.0%  | 0         | 0.0%  | 0         | 0.0%  |
| mmu-mir-34c-5p | 9   | 50911181 | 50911203 | -      | edit     | 15       | 4        | 0.1%  | 4         | 0.2%  | 50        | 0.2%  |
| mmu-mir-34c-5p | 9   | 50911181 | 50911203 | -      | edit     | 16       | 18       | 0.7%  | 31        | 1.4%  | 283       | 1.0%  |
| mmu-mir-34c-5p | 9   | 50911181 | 50911203 | -      | edit     | 17       | 0        | 0.0%  | 0         | 0.0%  | 74        | 0.3%  |
| mmu-mir-34c-5p | 9   | 50911181 | 50911203 | -      | edit     | 18       | 0        | 0.0%  | 5         | 0.2%  | 23        | 0.1%  |
| mmu-mir-34c-5p | 9   | 50911181 | 50911203 | -      | edit     | 19       | 13       | 0.5%  | 36        | 1.7%  | 191       | 0.7%  |
| mmu-mir-34c-5p | 9   | 50911181 | 50911203 | -      | edit     | 20       | 4        | 0.1%  | 0         | 0.0%  | 83        | 0.3%  |
| mmu-mir-34c-5p | 9   | 50911181 | 50911203 | -      | edit     | 21       | 6        | 0.2%  | 0         | 0.0%  | 61        | 0.2%  |
| mmu-mir-34c-5p | 9   | 50911181 | 50911203 | -      | edit     | 22       | 0        | 0.0%  | 0         | 0.0%  | 36        | 0.1%  |
| mmu-mir-34c-5p | 9   | 50911181 | 50911203 | -      | edit     | 23       | 0        | 0.0%  | 0         | 0.0%  | 6         | 0.0%  |
| EDITED         |     |          |          |        |          |          | 48       | 1.7%  | 78        | 3.6%  | 928       | 3.3%  |
| CANONICAL      |     |          |          |        |          |          | 2719     | 98.3% | 2069      | 96.4% | 27073     | 96.7% |
| TOTAL          |     |          |          |        |          |          | 2767     |       | 2147      |       | 28001     |       |

| miRNA            | Chr | Start     | Stop      | Strand | Type | Position | P7 reads | P7%   | P10 reads | P10%  | P14 reads | P14%  |
|------------------|-----|-----------|-----------|--------|------|----------|----------|-------|-----------|-------|-----------|-------|
| mmu-mir-92a-1-5p | 14  | 115443698 | 115443718 | +      | edit | 1        | 0        | 0.0%  | 0         | 0.0%  | 0         | 0.0%  |
| mmu-mir-92a-1-5p | 14  | 115443698 | 115443718 | +      | edit | 2        | 0        | 0.0%  | 0         | 0.0%  | 0         | 0.0%  |
| mmu-mir-92a-1-5p | 14  | 115443698 | 115443718 | +      | edit | 3        | 0        | 0.0%  | 0         | 0.0%  | 0         | 0.0%  |
| mmu-mir-92a-1-5p | 14  | 115443698 | 115443718 | +      | edit | 4        | 3        | 0.2%  | 0         | 0.0%  | 3         | 0.3%  |
| mmu-mir-92a-1-5p | 14  | 115443698 | 115443718 | +      | edit | 5        | 0        | 0.0%  | 0         | 0.0%  | 0         | 0.0%  |
| mmu-mir-92a-1-5p | 14  | 115443698 | 115443718 | +      | edit | 6        | 0        | 0.0%  | 0         | 0.0%  | 0         | 0.0%  |
| mmu-mir-92a-1-5p | 14  | 115443698 | 115443718 | +      | edit | 7        | 0        | 0.0%  | 0         | 0.0%  | 0         | 0.0%  |
| mmu-mir-92a-1-5p | 14  | 115443698 | 115443718 | +      | edit | 8        | 0        | 0.0%  | 0         | 0.0%  | 0         | 0.0%  |
| mmu-mir-92a-1-5p | 14  | 115443698 | 115443718 | +      | edit | 9        | 0        | 0.0%  | 0         | 0.0%  | 0         | 0.0%  |
| mmu-mir-92a-1-5p | 14  | 115443698 | 115443718 | +      | edit | 10       | 0        | 0.0%  | 0         | 0.0%  | 0         | 0.0%  |
| mmu-mir-92a-1-5p | 14  | 115443698 | 115443718 | +      | edit | 11       | 0        | 0.0%  | 0         | 0.0%  | 0         | 0.0%  |
| mmu-mir-92a-1-5p | 14  | 115443698 | 115443718 | +      | edit | 12       | 0        | 0.0%  | 0         | 0.0%  | 0         | 0.0%  |
| mmu-mir-92a-1-5p | 14  | 115443698 | 115443718 | +      | edit | 13       | 0        | 0.0%  | 0         | 0.0%  | 0         | 0.0%  |
| mmu-mir-92a-1-5p | 14  | 115443698 | 115443718 | +      | edit | 14       | 0        | 0.0%  | 0         | 0.0%  | 0         | 0.0%  |
| mmu-mir-92a-1-5p | 14  | 115443698 | 115443718 | +      | edit | 15       | 0        | 0.0%  | 4         | 0.3%  | 0         | 0.0%  |
| mmu-mir-92a-1-5p | 14  | 115443698 | 115443718 | +      | edit | 16       | 0        | 0.0%  | 0         | 0.0%  | 0         | 0.0%  |
| mmu-mir-92a-1-5p | 14  | 115443698 | 115443718 | +      | edit | 17       | 0        | 0.0%  | 0         | 0.0%  | 0         | 0.0%  |
| mmu-mir-92a-1-5p | 14  | 115443698 | 115443718 | +      | edit | 18       | 0        | 0.0%  | 0         | 0.0%  | 0         | 0.0%  |
| mmu-mir-92a-1-5p | 14  | 115443698 | 115443718 | +      | edit | 19       | 46       | 2.5%  | 40        | 3.3%  | 31        | 3.1%  |
| mmu-mir-92a-1-5p | 14  | 115443698 | 115443718 | +      | edit | 20       | 0        | 0.0%  | 0         | 0.0%  | 0         | 0.0%  |
| mmu-mir-92a-1-5p | 14  | 115443698 | 115443718 | +      | edit | 21       | 0        | 0.0%  | 0         | 0.0%  | 0         | 0.0%  |
| mmu-mir-92a-1-5p | 14  | 115443698 | 115443718 | +      | edit | 22       | 0        | 0.0%  | 0         | 0.0%  | 0         | 0.0%  |
| EDITED           |     |           |           |        |      |          | 49       | 2.7%  | 44        | 3.5%  | 34        | 3.4%  |
| CANONICAL        |     |           |           |        |      |          | 1794     | 97.3% | 1185      | 96.5% | 952       | 96.6% |
| TOTAL            |     |           |           |        |      |          | 1843     |       | 1229      |       | 986       |       |

| miRNA          | Chr | Start    | Stop     | Strand | Type | Position | P7 reads | P7%    | P10 reads | P10%   | P14 reads | P14%  |
|----------------|-----|----------|----------|--------|------|----------|----------|--------|-----------|--------|-----------|-------|
| mmu-mir-92b-5p | 3   | 89031048 | 89031069 | -      | edit | 1        | 0        | 0.0%   | 0         | 0.0%   | 0         | 0.0%  |
| mmu-mir-92b-5p | 3   | 89031048 | 89031069 | -      | edit | 2        | 0        | 0.0%   | 0         | 0.0%   | 0         | 0.0%  |
| mmu-mir-92b-5p | 3   | 89031048 | 89031069 | -      | edit | 3        | 0        | 0.0%   | 0         | 0.0%   | 0         | 0.0%  |
| mmu-mir-92b-5p | 3   | 89031048 | 89031069 | -      | edit | 4        | 0        | 0.0%   | 0         | 0.0%   | 0         | 0.0%  |
| mmu-mir-92b-5p | 3   | 89031048 | 89031069 | -      | edit | 5        | 0        | 0.0%   | 0         | 0.0%   | 0         | 0.0%  |
| mmu-mir-92b-5p | 3   | 89031048 | 89031069 | -      | edit | 6        | 0        | 0.0%   | 0         | 0.0%   | 0         | 0.0%  |
| mmu-mir-92b-5p | 3   | 89031048 | 89031069 | -      | edit | 7        | 0        | 0.0%   | 0         | 0.0%   | 0         | 0.0%  |
| mmu-mir-92b-5p | 3   | 89031048 | 89031069 | -      | edit | 8        | 0        | 0.0%   | 0         | 0.0%   | 0         | 0.0%  |
| mmu-mir-92b-5p | 3   | 89031048 | 89031069 | -      | edit | 9        | 0        | 0.0%   | 0         | 0.0%   | 0         | 0.0%  |
| mmu-mir-92b-5p | 3   | 89031048 | 89031069 | -      | edit | 10       | 0        | 0.0%   | 0         | 0.0%   | 0         | 0.0%  |
| mmu-mir-92b-5p | 3   | 89031048 | 89031069 | -      | edit | 11       | 0        | 0.0%   | 0         | 0.0%   | 0         | 0.0%  |
| mmu-mir-92b-5p | 3   | 89031048 | 89031069 | -      | edit | 12       | 0        | 0.0%   | 0         | 0.0%   | 0         | 0.0%  |
| mmu-mir-92b-5p | 3   | 89031048 | 89031069 | -      | edit | 13       | 0        | 0.0%   | 0         | 0.0%   | 0         | 0.0%  |
| mmu-mir-92b-5p | 3   | 89031048 | 89031069 | -      | edit | 14       | 0        | 0.0%   | 0         | 0.0%   | 0         | 0.0%  |
| mmu-mir-92b-5p | 3   | 89031048 | 89031069 | -      | edit | 15       | 0        | 0.0%   | 0         | 0.0%   | 0         | 0.0%  |
| mmu-mir-92b-5p | 3   | 89031048 | 89031069 | -      | edit | 16       | 0        | 0.0%   | 0         | 0.0%   | 0         | 0.0%  |
| mmu-mir-92b-5p | 3   | 89031048 | 89031069 | -      | edit | 17       | 0        | 0.0%   | 0         | 0.0%   | 0         | 0.0%  |
| mmu-mir-92b-5p | 3   | 89031048 | 89031069 | -      | edit | 18       | 0        | 0.0%   | 0         | 0.0%   | 0         | 0.0%  |
| mmu-mir-92b-5p | 3   | 89031048 | 89031069 | -      | edit | 19       | 0        | 0.0%   | 0         | 0.0%   | 6         | 2.8%  |
| mmu-mir-92b-5p | 3   | 89031048 | 89031069 | -      | edit | 20       | 0        | 0.0%   | 0         | 0.0%   | 0         | 0.0%  |
| mmu-mir-92b-5p | 3   | 89031048 | 89031069 | -      | edit | 21       | 0        | 0.0%   | 0         | 0.0%   | 0         | 0.0%  |
| mmu-mir-92b-5p | 3   | 89031048 | 89031069 | -      | edit | 22       | 0        | 0.0%   | 0         | 0.0%   | 0         | 0.0%  |
| EDITED         |     |          |          |        |      |          | 0        | 0.0%   | 0         | 0.0%   | 6         | 2.8%  |
| CANONICAL      |     |          |          |        |      |          | 208      | 100.0% | 239       | 100.0% | 206       | 97.2% |
| TOTAL          |     |          |          |        |      |          | 208      |        | 239       |        | 212       |       |

| miRNA         | Chr | Start     | Stop      | Strand | Type | Position | P7 reads | P7%   | P10 reads | P10%  | P14 reads | P14%  |
|---------------|-----|-----------|-----------|--------|------|----------|----------|-------|-----------|-------|-----------|-------|
| mmu-mir-93-5p | 5   | 138606802 | 138606824 | -      | edit | 1        | 0        | 0.0%  | 0         | 0.0%  | 0         | 0.0%  |
| mmu-mir-93-5p | 5   | 138606802 | 138606824 | -      | edit | 2        | 0        | 0.0%  | 0         | 0.0%  | 0         | 0.0%  |
| mmu-mir-93-5p | 5   | 138606802 | 138606824 | -      | edit | 3        | 0        | 0.0%  | 0         | 0.0%  | 0         | 0.0%  |
| mmu-mir-93-5p | 5   | 138606802 | 138606824 | -      | edit | 4        | 0        | 0.0%  | 0         | 0.0%  | 0         | 0.0%  |
| mmu-mir-93-5p | 5   | 138606802 | 138606824 | -      | edit | 5        | 0        | 0.0%  | 0         | 0.0%  | 0         | 0.0%  |
| mmu-mir-93-5p | 5   | 138606802 | 138606824 | -      | edit | 6        | 0        | 0.0%  | 0         | 0.0%  | 0         | 0.0%  |
| mmu-mir-93-5p | 5   | 138606802 | 138606824 | -      | edit | 7        | 0        | 0.0%  | 0         | 0.0%  | 0         | 0.0%  |
| mmu-mir-93-5p | 5   | 138606802 | 138606824 | -      | edit | 8        | 0        | 0.0%  | 0         | 0.0%  | 0         | 0.0%  |
| mmu-mir-93-5p | 5   | 138606802 | 138606824 | -      | edit | 9        | 0        | 0.0%  | 0         | 0.0%  | 0         | 0.0%  |
| mmu-mir-93-5p | 5   | 138606802 | 138606824 | -      | edit | 10       | 0        | 0.0%  | 0         | 0.0%  | 0         | 0.0%  |
| mmu-mir-93-5p | 5   | 138606802 | 138606824 | -      | edit | 11       | 0        | 0.0%  | 0         | 0.0%  | 0         | 0.0%  |
| mmu-mir-93-5p | 5   | 138606802 | 138606824 | -      | edit | 12       | 0        | 0.0%  | 0         | 0.0%  | 0         | 0.0%  |
| mmu-mir-93-5p | 5   | 138606802 | 138606824 | -      | edit | 13       | 0        | 0.0%  | 0         | 0.0%  | 0         | 0.0%  |
| mmu-mir-93-5p | 5   | 138606802 | 138606824 | -      | edit | 14       | 0        | 0.0%  | 0         | 0.0%  | 0         | 0.0%  |
| mmu-mir-93-5p | 5   | 138606802 | 138606824 | -      | edit | 15       | 0        | 0.0%  | 0         | 0.0%  | 5         | 1.0%  |
| mmu-mir-93-5p | 5   | 138606802 | 138606824 | -      | edit | 16       | 0        | 0.0%  | 0         | 0.0%  | 0         | 0.0%  |
| mmu-mir-93-5p | 5   | 138606802 | 138606824 | -      | edit | 17       | 6        | 0.4%  | 8         | 1.1%  | 4         | 0.9%  |
| mmu-mir-93-5p | 5   | 138606802 | 138606824 | -      | edit | 18       | 0        | 0.0%  | 4         | 0.5%  | 0         | 0.0%  |
| mmu-mir-93-5p | 5   | 138606802 | 138606824 | -      | edit | 19       | 0        | 0.0%  | 0         | 0.0%  | 0         | 0.0%  |
| mmu-mir-93-5p | 5   | 138606802 | 138606824 | -      | edit | 20       | 0        | 0.0%  | 0         | 0.0%  | 0         | 0.0%  |
| mmu-mir-93-5p | 5   | 138606802 | 138606824 | -      | edit | 21       | 13       | 1.0%  | 6         | 0.8%  | 17        | 3.6%  |
| mmu-mir-93-5p | 5   | 138606802 | 138606824 | -      | edit | 22       | 0        | 0.0%  | 0         | 0.0%  | 0         | 0.0%  |
| EDITED        |     |           |           |        |      |          | 19       | 1.4%  | 18        | 2.4%  | 26        | 5.4%  |
| CANONICAL     |     |           |           |        |      |          | 1330     | 98.6% | 732       | 97.6% | 444       | 94.6% |
| TOTAL         |     |           |           |        |      |          | 1349     |       | 750       |       | 470       |       |



| miRNA         | Chr | Start     | Stop      | Strand | Type | Position | P7 reads   | P7%         | P10 reads | P10%        | P14 reads | P14%         |
|---------------|-----|-----------|-----------|--------|------|----------|------------|-------------|-----------|-------------|-----------|--------------|
| mmu-mir-98-5p | X   | 148347772 | 148347793 | +      | edit | 1        | 0          | 0.0%        | 0         | 0.0%        | 0         | 0.0%         |
| mmu-mir-98-5p | X   | 148347772 | 148347793 | +      | edit | 2        | 0          | 0.0%        | 0         | 0.0%        | 0         | 0.0%         |
| mmu-mir-98-5p | X   | 148347772 | 148347793 | +      | edit | 3        | 0          | 0.0%        | 0         | 0.0%        | 0         | 0.0%         |
| mmu-mir-98-5p | X   | 148347772 | 148347793 | +      | edit | 4        | 0          | 0.0%        | 0         | 0.0%        | 0         | 0.0%         |
| mmu-mir-98-5p | X   | 148347772 | 148347793 | +      | edit | 5        | 0          | 0.0%        | 0         | 0.0%        | 0         | 0.0%         |
| mmu-mir-98-5p | X   | 148347772 | 148347793 | +      | edit | 6        | 0          | 0.0%        | 0         | 0.0%        | 0         | 0.0%         |
| mmu-mir-98-5p | X   | 148347772 | 148347793 | +      | edit | 7        | 0          | 0.0%        | 0         | 0.0%        | 0         | 0.0%         |
| mmu-mir-98-5p | X   | 148347772 | 148347793 | +      | edit | 8        | 0          | 0.0%        | 0         | 0.0%        | 0         | 0.0%         |
| mmu-mir-98-5p | X   | 148347772 | 148347793 | +      | edit | 9        | 0          | 0.0%        | 0         | 0.0%        | 0         | 0.0%         |
| mmu-mir-98-5p | X   | 148347772 | 148347793 | +      | edit | 10       | 0          | 0.0%        | 0         | 0.0%        | 0         | 0.0%         |
| mmu-mir-98-5p | X   | 148347772 | 148347793 | +      | edit | 11       | 21         | 1.0%        | 8         | 0.6%        | 9         | 1.0%         |
| mmu-mir-98-5p | X   | 148347772 | 148347793 | +      | edit | 12       | 0          | 0.0%        | 0         | 0.0%        | 0         | 0.0%         |
| mmu-mir-98-5p | X   | 148347772 | 148347793 | +      | edit | 13       | 0          | 0.0%        | 0         | 0.0%        | 0         | 0.0%         |
| mmu-mir-98-5p | X   | 148347772 | 148347793 | +      | edit | 14       | 0          | 0.0%        | 0         | 0.0%        | 0         | 0.0%         |
| mmu-mir-98-5p | X   | 148347772 | 148347793 | +      | edit | 15       | 0          | 0.0%        | 0         | 0.0%        | 0         | 0.0%         |
| mmu-mir-98-5p | X   | 148347772 | 148347793 | +      | edit | 16       | 0          | 0.0%        | 0         | 0.0%        | 0         | 0.0%         |
| mmu-mir-98-5p | X   | 148347772 | 148347793 | +      | edit | 17       | 0          | 0.0%        | 0         | 0.0%        | 0         | 0.0%         |
| mmu-mir-98-5p | X   | 148347772 | 148347793 | +      | edit | 18       | 0          | 0.0%        | 0         | 0.0%        | 0         | 0.0%         |
| mmu-mir-98-5p | X   | 148347772 | 148347793 | +      | edit | 19       | <b>176</b> | <b>8.3%</b> | <b>78</b> | <b>5.8%</b> | <b>97</b> | <b>10.6%</b> |
| mmu-mir-98-5p | X   | 148347772 | 148347793 | +      | edit | 20       | 0          | 0.0%        | 0         | 0.0%        | 0         | 0.0%         |
| mmu-mir-98-5p | X   | 148347772 | 148347793 | +      | edit | 21       | 0          | 0.0%        | 0         | 0.0%        | 0         | 0.0%         |
| mmu-mir-98-5p | X   | 148347772 | 148347793 | +      | edit | 22       | 0          | 0.0%        | 0         | 0.0%        | 0         | 0.0%         |
| EDITED        |     |           |           |        |      |          | 197        | 9.3%        | 86        | 6.4%        | 106       | 11.6%        |
| CANONICAL     |     |           |           |        |      |          | 1916       | 90.7%       | 1261      | 93.6%       | 806       | 88.4%        |
| TOTAL         |     |           |           |        |      |          | 2113       |             | 1347      |             | 912       |              |

| miRNA          | Chr | Start    | Stop     | Strand | Type    | Position | P7 reads | P7%   | P10 reads | P10%  | P14 reads | P14%  |
|----------------|-----|----------|----------|--------|---------|----------|----------|-------|-----------|-------|-----------|-------|
| mmu-mir-99a-5p | 16  | 77599185 | 77599206 | +      | 3' Edit | 3'       | 3        | 0.0%  | 0         | 0.0%  | 3         | 0.1%  |
| mmu-mir-99a-5p | 16  | 77599185 | 77599206 | +      | edit    | 1        | 0        | 0.0%  | 0         | 0.0%  | 0         | 0.0%  |
| mmu-mir-99a-5p | 16  | 77599185 | 77599206 | +      | edit    | 2        | 0        | 0.0%  | 0         | 0.0%  | 0         | 0.0%  |
| mmu-mir-99a-5p | 16  | 77599185 | 77599206 | +      | edit    | 3        | 0        | 0.0%  | 0         | 0.0%  | 0         | 0.0%  |
| mmu-mir-99a-5p | 16  | 77599185 | 77599206 | +      | edit    | 4        | 3        | 0.0%  | 0         | 0.0%  | 6         | 0.2%  |
| mmu-mir-99a-5p | 16  | 77599185 | 77599206 | +      | edit    | 5        | 0        | 0.0%  | 0         | 0.0%  | 0         | 0.0%  |
| mmu-mir-99a-5p | 16  | 77599185 | 77599206 | +      | edit    | 6        | 10       | 0.1%  | 0         | 0.0%  | 0         | 0.0%  |
| mmu-mir-99a-5p | 16  | 77599185 | 77599206 | +      | edit    | 7        | 0        | 0.0%  | 0         | 0.0%  | 0         | 0.0%  |
| mmu-mir-99a-5p | 16  | 77599185 | 77599206 | +      | edit    | 8        | 9        | 0.1%  | 0         | 0.0%  | 0         | 0.0%  |
| mmu-mir-99a-5p | 16  | 77599185 | 77599206 | +      | edit    | 9        | 0        | 0.0%  | 0         | 0.0%  | 0         | 0.0%  |
| mmu-mir-99a-5p | 16  | 77599185 | 77599206 | +      | edit    | 10       | 0        | 0.0%  | 0         | 0.0%  | 0         | 0.0%  |
| mmu-mir-99a-5p | 16  | 77599185 | 77599206 | +      | edit    | 11       | 0        | 0.0%  | 0         | 0.0%  | 0         | 0.0%  |
| mmu-mir-99a-5p | 16  | 77599185 | 77599206 | +      | edit    | 12       | 0        | 0.0%  | 0         | 0.0%  | 0         | 0.0%  |
| mmu-mir-99a-5p | 16  | 77599185 | 77599206 | +      | edit    | 13       | 0        | 0.0%  | 0         | 0.0%  | 0         | 0.0%  |
| mmu-mir-99a-5p | 16  | 77599185 | 77599206 | +      | edit    | 14       | 0        | 0.0%  | 0         | 0.0%  | 0         | 0.0%  |
| mmu-mir-99a-5p | 16  | 77599185 | 77599206 | +      | edit    | 15       | 43       | 0.4%  | 113       | 1.8%  | 15        | 0.4%  |
| mmu-mir-99a-5p | 16  | 77599185 | 77599206 | +      | edit    | 16       | 0        | 0.0%  | 0         | 0.0%  | 0         | 0.0%  |
| mmu-mir-99a-5p | 16  | 77599185 | 77599206 | +      | edit    | 17       | 0        | 0.0%  | 0         | 0.0%  | 0         | 0.0%  |
| mmu-mir-99a-5p | 16  | 77599185 | 77599206 | +      | edit    | 18       | 0        | 0.0%  | 0         | 0.0%  | 0         | 0.0%  |
| mmu-mir-99a-5p | 16  | 77599185 | 77599206 | +      | edit    | 19       | 45       | 0.4%  | 28        | 0.4%  | 7         | 0.2%  |
| EDITED         |     |          |          |        |         |          | 113      | 0.9%  | 141       | 2.2%  | 31        | 0.8%  |
| CANONICAL      |     |          |          |        |         |          | 11936    | 99.1% | 6245      | 97.8% | 3743      | 99.2% |
| TOTAL          |     |          |          |        |         |          | 12049    |       | 6386      |       | 3774      |       |

| miRNA          | Chr | Start    | Stop     | Strand | Type     | Position | P7 reads  | P7%         | P10 reads | P10%        | P14 reads | P14%         |
|----------------|-----|----------|----------|--------|----------|----------|-----------|-------------|-----------|-------------|-----------|--------------|
| mmu-mir-99b-3p | 17  | 17967196 | 17967217 | +      | 3' Edit  | 3'       | 17        | 0.9%        | 0         | 0.0%        | 0         | 0.0%         |
| mmu-mir-99b-3p | 17  | 17967196 | 17967217 | +      | 3' Indel | 3'       | 9         | 0.5%        | 0         | 0.0%        | 0         | 0.0%         |
| mmu-mir-99b-3p | 17  | 17967196 | 17967217 | +      | Indel    | 22       | 8         | 0.4%        | 9         | 1.6%        | 3         | 1.0%         |
| mmu-mir-99b-3p | 17  | 17967196 | 17967217 | +      | edit     | 1        | 0         | 0.0%        | 0         | 0.0%        | 0         | 0.0%         |
| mmu-mir-99b-3p | 17  | 17967196 | 17967217 | +      | edit     | 2        | 0         | 0.0%        | 0         | 0.0%        | 0         | 0.0%         |
| mmu-mir-99b-3p | 17  | 17967196 | 17967217 | +      | edit     | 3        | 0         | 0.0%        | 0         | 0.0%        | 0         | 0.0%         |
| mmu-mir-99b-3p | 17  | 17967196 | 17967217 | +      | edit     | 4        | 0         | 0.0%        | 0         | 0.0%        | 0         | 0.0%         |
| mmu-mir-99b-3p | 17  | 17967196 | 17967217 | +      | edit     | 5        | 0         | 0.0%        | 0         | 0.0%        | 0         | 0.0%         |
| mmu-mir-99b-3p | 17  | 17967196 | 17967217 | +      | edit     | 6        | 0         | 0.0%        | 0         | 0.0%        | 0         | 0.0%         |
| mmu-mir-99b-3p | 17  | 17967196 | 17967217 | +      | edit     | 7        | 0         | 0.0%        | 0         | 0.0%        | 0         | 0.0%         |
| mmu-mir-99b-3p | 17  | 17967196 | 17967217 | +      | edit     | 8        | 3         | 0.2%        | 0         | 0.0%        | 0         | 0.0%         |
| mmu-mir-99b-3p | 17  | 17967196 | 17967217 | +      | edit     | 9        | 0         | 0.0%        | 0         | 0.0%        | 0         | 0.0%         |
| mmu-mir-99b-3p | 17  | 17967196 | 17967217 | +      | edit     | 10       | 0         | 0.0%        | 0         | 0.0%        | 0         | 0.0%         |
| mmu-mir-99b-3p | 17  | 17967196 | 17967217 | +      | edit     | 11       | 0         | 0.0%        | 0         | 0.0%        | 0         | 0.0%         |
| mmu-mir-99b-3p | 17  | 17967196 | 17967217 | +      | edit     | 12       | 0         | 0.0%        | 0         | 0.0%        | 0         | 0.0%         |
| mmu-mir-99b-3p | 17  | 17967196 | 17967217 | +      | edit     | 13       | 0         | 0.0%        | 0         | 0.0%        | 0         | 0.0%         |
| mmu-mir-99b-3p | 17  | 17967196 | 17967217 | +      | edit     | 14       | 0         | 0.0%        | 0         | 0.0%        | 0         | 0.0%         |
| mmu-mir-99b-3p | 17  | 17967196 | 17967217 | +      | edit     | 15       | 13        | 0.7%        | 7         | 1.3%        | 3         | 1.0%         |
| mmu-mir-99b-3p | 17  | 17967196 | 17967217 | +      | edit     | 16       | 0         | 0.0%        | 0         | 0.0%        | 0         | 0.0%         |
| mmu-mir-99b-3p | 17  | 17967196 | 17967217 | +      | edit     | 17       | 0         | 0.0%        | 0         | 0.0%        | 0         | 0.0%         |
| mmu-mir-99b-3p | 17  | 17967196 | 17967217 | +      | edit     | 18       | 0         | 0.0%        | 0         | 0.0%        | 0         | 0.0%         |
| mmu-mir-99b-3p | 17  | 17967196 | 17967217 | +      | edit     | 19       | <b>98</b> | <b>5.4%</b> | <b>31</b> | <b>5.5%</b> | <b>29</b> | <b>10.1%</b> |
| mmu-mir-99b-3p | 17  | 17967196 | 17967217 | +      | edit     | 20       | 0         | 0.0%        | 0         | 0.0%        | 0         | 0.0%         |
| mmu-mir-99b-3p | 17  | 17967196 | 17967217 | +      | edit     | 21       | 0         | 0.0%        | 0         | 0.0%        | 0         | 0.0%         |
| mmu-mir-99b-3p | 17  | 17967196 | 17967217 | +      | edit     | 22       | 0         | 0.0%        | 0         | 0.0%        | 0         | 0.0%         |
| EDITED         |     |          |          |        |          |          | 147       | 8.1%        | 47        | 8.4%        | 35        | 12.2%        |
| CANONICAL      |     |          |          |        |          |          | 1672      | 91.9%       | 509       | 91.6%       | 251       | 87.8%        |
| TOTAL          |     |          |          |        |          |          | 1819      |             | 556       |             | 286       |              |

| miRNA          | Chr | Start    | Stop     | Strand | Type | Position | P7 reads | P7%   | P10 reads | P10%  | P14 reads | P14%  |
|----------------|-----|----------|----------|--------|------|----------|----------|-------|-----------|-------|-----------|-------|
| mmu-mir-99b-5p | 17  | 17967158 | 17967179 | +      | edit | 1        | 0        | 0.0%  | 0         | 0.0%  | 0         | 0.0%  |
| mmu-mir-99b-5p | 17  | 17967158 | 17967179 | +      | edit | 2        | 0        | 0.0%  | 0         | 0.0%  | 0         | 0.0%  |
| mmu-mir-99b-5p | 17  | 17967158 | 17967179 | +      | edit | 3        | 0        | 0.0%  | 0         | 0.0%  | 0         | 0.0%  |
| mmu-mir-99b-5p | 17  | 17967158 | 17967179 | +      | edit | 4        | 13       | 0.1%  | 18        | 0.4%  | 8         | 0.3%  |
| mmu-mir-99b-5p | 17  | 17967158 | 17967179 | +      | edit | 5        | 0        | 0.0%  | 0         | 0.0%  | 0         | 0.0%  |
| mmu-mir-99b-5p | 17  | 17967158 | 17967179 | +      | edit | 6        | 4        | 0.0%  | 3         | 0.1%  | 4         | 0.2%  |
| mmu-mir-99b-5p | 17  | 17967158 | 17967179 | +      | edit | 7        | 0        | 0.0%  | 0         | 0.0%  | 0         | 0.0%  |
| mmu-mir-99b-5p | 17  | 17967158 | 17967179 | +      | edit | 8        | 11       | 0.1%  | 0         | 0.0%  | 0         | 0.0%  |
| mmu-mir-99b-5p | 17  | 17967158 | 17967179 | +      | edit | 9        | 0        | 0.0%  | 0         | 0.0%  | 0         | 0.0%  |
| mmu-mir-99b-5p | 17  | 17967158 | 17967179 | +      | edit | 10       | 0        | 0.0%  | 0         | 0.0%  | 0         | 0.0%  |
| mmu-mir-99b-5p | 17  | 17967158 | 17967179 | +      | edit | 11       | 0        | 0.0%  | 0         | 0.0%  | 0         | 0.0%  |
| mmu-mir-99b-5p | 17  | 17967158 | 17967179 | +      | edit | 12       | 0        | 0.0%  | 0         | 0.0%  | 0         | 0.0%  |
| mmu-mir-99b-5p | 17  | 17967158 | 17967179 | +      | edit | 13       | 0        | 0.0%  | 0         | 0.0%  | 0         | 0.0%  |
| mmu-mir-99b-5p | 17  | 17967158 | 17967179 | +      | edit | 14       | 0        | 0.0%  | 0         | 0.0%  | 0         | 0.0%  |
| mmu-mir-99b-5p | 17  | 17967158 | 17967179 | +      | edit | 15       | 40       | 0.3%  | 93        | 2.0%  | 6         | 0.2%  |
| mmu-mir-99b-5p | 17  | 17967158 | 17967179 | +      | edit | 16       | 0        | 0.0%  | 0         | 0.0%  | 0         | 0.0%  |
| mmu-mir-99b-5p | 17  | 17967158 | 17967179 | +      | edit | 17       | 0        | 0.0%  | 0         | 0.0%  | 0         | 0.0%  |
| mmu-mir-99b-5p | 17  | 17967158 | 17967179 | +      | edit | 18       | 0        | 0.0%  | 0         | 0.0%  | 0         | 0.0%  |
| mmu-mir-99b-5p | 17  | 17967158 | 17967179 | +      | edit | 19       | 71       | 0.6%  | 31        | 0.7%  | 16        | 0.6%  |
| mmu-mir-99b-5p | 17  | 17967158 | 17967179 | +      | edit | 20       | 0        | 0.0%  | 0         | 0.0%  | 0         | 0.0%  |
| mmu-mir-99b-5p | 17  | 17967158 | 17967179 | +      | edit | 21       | 0        | 0.0%  | 0         | 0.0%  | 0         | 0.0%  |
| mmu-mir-99b-5p | 17  | 17967158 | 17967179 | +      | edit | 22       | 3        | 0.0%  | 0         | 0.0%  | 0         | 0.0%  |
| EDITED         |     |          |          |        |      |          | 142      | 1.1%  | 145       | 3.0%  | 34        | 1.3%  |
| CANONICAL      |     |          |          |        |      |          | 12436    | 98.9% | 4621      | 97.0% | 2500      | 98.7% |
| TOTAL          |     |          |          |        |      |          | 12578    |       | 4766      |       | 2534      |       |

| miRNA          | Chr | Start    | Stop     | Strand | Type | Position | P7 reads | P7%   | P10 reads | P10%  | P14 reads | P14%  |
|----------------|-----|----------|----------|--------|------|----------|----------|-------|-----------|-------|-----------|-------|
| mmu-mir-100-5p | 9   | 41339520 | 41339541 | +      | edit | 1        | 0        | 0.0%  | 0         | 0.0%  | 0         | 0.0%  |
| mmu-mir-100-5p | 9   | 41339520 | 41339541 | +      | edit | 2        | 0        | 0.0%  | 0         | 0.0%  | 0         | 0.0%  |
| mmu-mir-100-5p | 9   | 41339520 | 41339541 | +      | edit | 3        | 0        | 0.0%  | 0         | 0.0%  | 0         | 0.0%  |
| mmu-mir-100-5p | 9   | 41339520 | 41339541 | +      | edit | 4        | 0        | 0.0%  | 0         | 0.0%  | 0         | 0.0%  |
| mmu-mir-100-5p | 9   | 41339520 | 41339541 | +      | edit | 5        | 0        | 0.0%  | 0         | 0.0%  | 0         | 0.0%  |
| mmu-mir-100-5p | 9   | 41339520 | 41339541 | +      | edit | 6        | 0        | 0.0%  | 0         | 0.0%  | 0         | 0.0%  |
| mmu-mir-100-5p | 9   | 41339520 | 41339541 | +      | edit | 7        | 0        | 0.0%  | 0         | 0.0%  | 0         | 0.0%  |
| mmu-mir-100-5p | 9   | 41339520 | 41339541 | +      | edit | 8        | 0        | 0.0%  | 0         | 0.0%  | 0         | 0.0%  |
| mmu-mir-100-5p | 9   | 41339520 | 41339541 | +      | edit | 9        | 0        | 0.0%  | 0         | 0.0%  | 0         | 0.0%  |
| mmu-mir-100-5p | 9   | 41339520 | 41339541 | +      | edit | 10       | 0        | 0.0%  | 0         | 0.0%  | 0         | 0.0%  |
| mmu-mir-100-5p | 9   | 41339520 | 41339541 | +      | edit | 11       | 0        | 0.0%  | 0         | 0.0%  | 0         | 0.0%  |
| mmu-mir-100-5p | 9   | 41339520 | 41339541 | +      | edit | 12       | 0        | 0.0%  | 0         | 0.0%  | 0         | 0.0%  |
| mmu-mir-100-5p | 9   | 41339520 | 41339541 | +      | edit | 13       | 0        | 0.0%  | 0         | 0.0%  | 0         | 0.0%  |
| mmu-mir-100-5p | 9   | 41339520 | 41339541 | +      | edit | 14       | 0        | 0.0%  | 0         | 0.0%  | 0         | 0.0%  |
| mmu-mir-100-5p | 9   | 41339520 | 41339541 | +      | edit | 15       | 0        | 0.0%  | 16        | 2.8%  | 4         | 0.8%  |
| mmu-mir-100-5p | 9   | 41339520 | 41339541 | +      | edit | 16       | 4        | 0.6%  | 0         | 0.0%  | 0         | 0.0%  |
| mmu-mir-100-5p | 9   | 41339520 | 41339541 | +      | edit | 17       | 0        | 0.0%  | 0         | 0.0%  | 0         | 0.0%  |
| mmu-mir-100-5p | 9   | 41339520 | 41339541 | +      | edit | 18       | 0        | 0.0%  | 0         | 0.0%  | 0         | 0.0%  |
| mmu-mir-100-5p | 9   | 41339520 | 41339541 | +      | edit | 19       | 3        | 0.5%  | 4         | 0.7%  | 0         | 0.0%  |
| mmu-mir-100-5p | 9   | 41339520 | 41339541 | +      | edit | 20       | 0        | 0.0%  | 0         | 0.0%  | 0         | 0.0%  |
| mmu-mir-100-5p | 9   | 41339520 | 41339541 | +      | edit | 21       | 0        | 0.0%  | 0         | 0.0%  | 0         | 0.0%  |
| mmu-mir-100-5p | 9   | 41339520 | 41339541 | +      | edit | 22       | 0        | 0.0%  | 0         | 0.0%  | 0         | 0.0%  |
| EDITED         |     |          |          |        |      |          | 7        | 1.0%  | 20        | 3.5%  | 4         | 0.8%  |
| CANONICAL      |     |          |          |        |      |          | 620      | 99.0% | 558       | 96.5% | 449       | 99.2% |
| TOTAL          |     |          |          |        |      |          | 627      |       | 578       |       | 453       |       |

| miRNA           | Chr | Start     | Stop      | Strand | Type    | Position | P7 reads | P7%   | P10 reads | P10%  | P14 reads | P14%  |
|-----------------|-----|-----------|-----------|--------|---------|----------|----------|-------|-----------|-------|-----------|-------|
| mmu-mir-101a-3p | 4   | 101019562 | 101019582 | -      | 5' Edit | 5'       | 0        | 0.0%  | 0         | 0.0%  | 4         | 0.1%  |
| mmu-mir-101a-3p | 4   | 101019562 | 101019582 | -      | Indel   | 21       | 0        | 0.0%  | 8         | 0.1%  | 4         | 0.1%  |
| mmu-mir-101a-3p | 4   | 101019562 | 101019582 | -      | edit    | 1        | 0        | 0.0%  | 0         | 0.0%  | 0         | 0.0%  |
| mmu-mir-101a-3p | 4   | 101019562 | 101019582 | -      | edit    | 2        | 0        | 0.0%  | 0         | 0.0%  | 0         | 0.0%  |
| mmu-mir-101a-3p | 4   | 101019562 | 101019582 | -      | edit    | 3        | 0        | 0.0%  | 0         | 0.0%  | 0         | 0.0%  |
| mmu-mir-101a-3p | 4   | 101019562 | 101019582 | -      | edit    | 4        | 0        | 0.0%  | 0         | 0.0%  | 0         | 0.0%  |
| mmu-mir-101a-3p | 4   | 101019562 | 101019582 | -      | edit    | 5        | 0        | 0.0%  | 0         | 0.0%  | 0         | 0.0%  |
| mmu-mir-101a-3p | 4   | 101019562 | 101019582 | -      | edit    | 6        | 0        | 0.0%  | 0         | 0.0%  | 0         | 0.0%  |
| mmu-mir-101a-3p | 4   | 101019562 | 101019582 | -      | edit    | 7        | 0        | 0.0%  | 0         | 0.0%  | 0         | 0.0%  |
| mmu-mir-101a-3p | 4   | 101019562 | 101019582 | -      | edit    | 8        | 0        | 0.0%  | 0         | 0.0%  | 0         | 0.0%  |
| mmu-mir-101a-3p | 4   | 101019562 | 101019582 | -      | edit    | 9        | 0        | 0.0%  | 0         | 0.0%  | 0         | 0.0%  |
| mmu-mir-101a-3p | 4   | 101019562 | 101019582 | -      | edit    | 10       | 0        | 0.0%  | 0         | 0.0%  | 0         | 0.0%  |
| mmu-mir-101a-3p | 4   | 101019562 | 101019582 | -      | edit    | 11       | 0        | 0.0%  | 0         | 0.0%  | 0         | 0.0%  |
| mmu-mir-101a-3p | 4   | 101019562 | 101019582 | -      | edit    | 12       | 0        | 0.0%  | 0         | 0.0%  | 0         | 0.0%  |
| mmu-mir-101a-3p | 4   | 101019562 | 101019582 | -      | edit    | 13       | 0        | 0.0%  | 0         | 0.0%  | 0         | 0.0%  |
| mmu-mir-101a-3p | 4   | 101019562 | 101019582 | -      | edit    | 14       | 0        | 0.0%  | 4         | 0.0%  | 5         | 0.1%  |
| mmu-mir-101a-3p | 4   | 101019562 | 101019582 | -      | edit    | 15       | 0        | 0.0%  | 22        | 0.3%  | 0         | 0.0%  |
| mmu-mir-101a-3p | 4   | 101019562 | 101019582 | -      | edit    | 16       | 0        | 0.0%  | 9         | 0.1%  | 0         | 0.0%  |
| mmu-mir-101a-3p | 4   | 101019562 | 101019582 | -      | edit    | 17       | 4        | 0.1%  | 0         | 0.0%  | 0         | 0.0%  |
| mmu-mir-101a-3p | 4   | 101019562 | 101019582 | -      | edit    | 18       | 10       | 0.1%  | 11        | 0.1%  | 10        | 0.2%  |
| mmu-mir-101a-3p | 4   | 101019562 | 101019582 | -      | edit    | 19       | 0        | 0.0%  | 0         | 0.0%  | 0         | 0.0%  |
| mmu-mir-101a-3p | 4   | 101019562 | 101019582 | -      | edit    | 20       | 0        | 0.0%  | 0         | 0.0%  | 0         | 0.0%  |
| mmu-mir-101a-3p | 4   | 101019562 | 101019582 | -      | edit    | 21       | 0        | 0.0%  | 6         | 0.1%  | 3         | 0.1%  |
| mmu-mir-101a-3p | 4   | 101019562 | 101019582 | -      | edit    | 22       | 0        | 0.0%  | 0         | 0.0%  | 0         | 0.0%  |
| EDITED          |     |           |           |        |         |          | 14       | 0.2%  | 59        | 0.8%  | 25        | 0.5%  |
| CANONICAL       |     |           |           |        |         |          | 7466     | 99.8% | 7364      | 99.2% | 4625      | 99.5% |
| TOTAL           |     |           |           |        |         |          | 7480     |       | 7423      |       | 4650      |       |

| miRNA           | Chr | Start    | Stop     | Strand | Type    | Position | P7 reads | P7%   | P10 reads | P10%  | P14 reads | P14%  |
|-----------------|-----|----------|----------|--------|---------|----------|----------|-------|-----------|-------|-----------|-------|
| mmu-mir-101b-5p | 19  | 29209829 | 29209849 | +      | 3' Edit | 3'       | 6        | 0.1%  | 0         | 0.0%  | 5         | 0.1%  |
| mmu-mir-101b-5p | 19  | 29209829 | 29209849 | +      | Indel   | 20       | 4        | 0.1%  | 0         | 0.0%  | 13        | 0.4%  |
| mmu-mir-101b-5p | 19  | 29209829 | 29209849 | +      | edit    | 1        | 0        | 0.0%  | 0         | 0.0%  | 0         | 0.0%  |
| mmu-mir-101b-5p | 19  | 29209829 | 29209849 | +      | edit    | 2        | 0        | 0.0%  | 0         | 0.0%  | 0         | 0.0%  |
| mmu-mir-101b-5p | 19  | 29209829 | 29209849 | +      | edit    | 3        | 0        | 0.0%  | 0         | 0.0%  | 3         | 0.1%  |
| mmu-mir-101b-5p | 19  | 29209829 | 29209849 | +      | edit    | 4        | 0        | 0.0%  | 4         | 0.1%  | 0         | 0.0%  |
| mmu-mir-101b-5p | 19  | 29209829 | 29209849 | +      | edit    | 5        | 0        | 0.0%  | 0         | 0.0%  | 0         | 0.0%  |
| mmu-mir-101b-5p | 19  | 29209829 | 29209849 | +      | edit    | 6        | 3        | 0.1%  | 7         | 0.2%  | 12        | 0.4%  |
| mmu-mir-101b-5p | 19  | 29209829 | 29209849 | +      | edit    | 7        | 0        | 0.0%  | 0         | 0.0%  | 0         | 0.0%  |
| mmu-mir-101b-5p | 19  | 29209829 | 29209849 | +      | edit    | 8        | 0        | 0.0%  | 0         | 0.0%  | 0         | 0.0%  |
| mmu-mir-101b-5p | 19  | 29209829 | 29209849 | +      | edit    | 9        | 0        | 0.0%  | 0         | 0.0%  | 0         | 0.0%  |
| mmu-mir-101b-5p | 19  | 29209829 | 29209849 | +      | edit    | 10       | 0        | 0.0%  | 0         | 0.0%  | 0         | 0.0%  |
| mmu-mir-101b-5p | 19  | 29209829 | 29209849 | +      | edit    | 11       | 0        | 0.0%  | 0         | 0.0%  | 0         | 0.0%  |
| mmu-mir-101b-5p | 19  | 29209829 | 29209849 | +      | edit    | 12       | 0        | 0.0%  | 0         | 0.0%  | 0         | 0.0%  |
| mmu-mir-101b-5p | 19  | 29209829 | 29209849 | +      | edit    | 13       | 0        | 0.0%  | 0         | 0.0%  | 0         | 0.0%  |
| mmu-mir-101b-5p | 19  | 29209829 | 29209849 | +      | edit    | 14       | 0        | 0.0%  | 0         | 0.0%  | 0         | 0.0%  |
| mmu-mir-101b-5p | 19  | 29209829 | 29209849 | +      | edit    | 15       | 0        | 0.0%  | 11        | 0.3%  | 0         | 0.0%  |
| mmu-mir-101b-5p | 19  | 29209829 | 29209849 | +      | edit    | 16       | 0        | 0.0%  | 10        | 0.2%  | 7         | 0.2%  |
| mmu-mir-101b-5p | 19  | 29209829 | 29209849 | +      | edit    | 17       | 0        | 0.0%  | 0         | 0.0%  | 3         | 0.1%  |
| mmu-mir-101b-5p | 19  | 29209829 | 29209849 | +      | edit    | 18       | 4        | 0.1%  | 3         | 0.1%  | 5         | 0.2%  |
| mmu-mir-101b-5p | 19  | 29209829 | 29209849 | +      | edit    | 19       | 4        | 0.1%  | 3         | 0.1%  | 0         | 0.0%  |
| mmu-mir-101b-5p | 19  | 29209829 | 29209849 | +      | edit    | 20       | 0        | 0.0%  | 0         | 0.0%  | 0         | 0.0%  |
| mmu-mir-101b-5p | 19  | 29209829 | 29209849 | +      | edit    | 21       | 0        | 0.0%  | 0         | 0.0%  | 0         | 0.0%  |
| mmu-mir-101b-5p | 19  | 29209829 | 29209849 | +      | edit    | 22       | 0        | 0.0%  | 0         | 0.0%  | 0         | 0.0%  |
| EDITED          |     |          |          |        |         |          | 21       | 0.4%  | 38        | 0.9%  | 47        | 1.5%  |
| CANONICAL       |     |          |          |        |         |          | 4779     | 99.6% | 4228      | 99.1% | 3090      | 98.5% |
| TOTAL           |     |          |          |        |         |          | 4800     |       | 4266      |       | 3137      |       |

| miRNA            | Chr | Start    | Stop     | Strand | Type     | Position | P7 reads | P7%   | P10 reads | P10%  | P14 reads | P14%  |
|------------------|-----|----------|----------|--------|----------|----------|----------|-------|-----------|-------|-----------|-------|
| mmu-mir-103-1-5p | 11  | 35595949 | 35595971 | +      | 3' Edit  | 3'       | 54       | 0.1%  | 0         | 0.0%  | 45        | 0.1%  |
| mmu-mir-103-1-5p | 11  | 35595949 | 35595971 | +      | 3' Indel | 3'       | 0        | 0.0%  | 0         | 0.0%  | 4         | 0.0%  |
| mmu-mir-103-1-5p | 11  | 35595949 | 35595971 | +      | Indel    | 21       | 5        | 0.0%  | 0         | 0.0%  | 7         | 0.0%  |
| mmu-mir-103-1-5p | 11  | 35595949 | 35595971 | +      | Indel    | 22       | 0        | 0.0%  | 0         | 0.0%  | 0         | 0.0%  |
| mmu-mir-103-1-5p | 11  | 35595949 | 35595971 | +      | Indel    | 23       | 0        | 0.0%  | 0         | 0.0%  | 3         | 0.0%  |
| mmu-mir-103-1-5p | 11  | 35595949 | 35595971 | +      | edit     | 1        | 0        | 0.0%  | 0         | 0.0%  | 0         | 0.0%  |
| mmu-mir-103-1-5p | 11  | 35595949 | 35595971 | +      | edit     | 2        | 0        | 0.0%  | 0         | 0.0%  | 0         | 0.0%  |
| mmu-mir-103-1-5p | 11  | 35595949 | 35595971 | +      | edit     | 3        | 0        | 0.0%  | 0         | 0.0%  | 0         | 0.0%  |
| mmu-mir-103-1-5p | 11  | 35595949 | 35595971 | +      | edit     | 4        | 10       | 0.0%  | 27        | 0.1%  | 6         | 0.0%  |
| mmu-mir-103-1-5p | 11  | 35595949 | 35595971 | +      | edit     | 5        | 0        | 0.0%  | 0         | 0.0%  | 0         | 0.0%  |
| mmu-mir-103-1-5p | 11  | 35595949 | 35595971 | +      | edit     | 6        | 34       | 0.1%  | 24        | 0.1%  | 30        | 0.1%  |
| mmu-mir-103-1-5p | 11  | 35595949 | 35595971 | +      | edit     | 7        | 0        | 0.0%  | 0         | 0.0%  | 0         | 0.0%  |
| mmu-mir-103-1-5p | 11  | 35595949 | 35595971 | +      | edit     | 8        | 59       | 0.1%  | 13        | 0.0%  | 15        | 0.0%  |
| mmu-mir-103-1-5p | 11  | 35595949 | 35595971 | +      | edit     | 9        | 0        | 0.0%  | 0         | 0.0%  | 0         | 0.0%  |
| mmu-mir-103-1-5p | 11  | 35595949 | 35595971 | +      | edit     | 10       | 0        | 0.0%  | 0         | 0.0%  | 0         | 0.0%  |
| mmu-mir-103-1-5p | 11  | 35595949 | 35595971 | +      | edit     | 11       | 0        | 0.0%  | 0         | 0.0%  | 0         | 0.0%  |
| mmu-mir-103-1-5p | 11  | 35595949 | 35595971 | +      | edit     | 12       | 0        | 0.0%  | 0         | 0.0%  | 0         | 0.0%  |
| mmu-mir-103-1-5p | 11  | 35595949 | 35595971 | +      | edit     | 13       | 0        | 0.0%  | 0         | 0.0%  | 3         | 0.0%  |
| mmu-mir-103-1-5p | 11  | 35595949 | 35595971 | +      | edit     | 14       | 0        | 0.0%  | 0         | 0.0%  | 0         | 0.0%  |
| mmu-mir-103-1-5p | 11  | 35595949 | 35595971 | +      | edit     | 15       | 125      | 0.2%  | 91        | 0.2%  | 81        | 0.2%  |
| mmu-mir-103-1-5p | 11  | 35595949 | 35595971 | +      | edit     | 16       | 78       | 0.1%  | 36        | 0.1%  | 16        | 0.0%  |
| mmu-mir-103-1-5p | 11  | 35595949 | 35595971 | +      | edit     | 17       | 8        | 0.0%  | 0         | 0.0%  | 6         | 0.0%  |
| mmu-mir-103-1-5p | 11  | 35595949 | 35595971 | +      | edit     | 18       | 0        | 0.0%  | 0         | 0.0%  | 0         | 0.0%  |
| mmu-mir-103-1-5p | 11  | 35595949 | 35595971 | +      | edit     | 19       | 339      | 0.6%  | 153       | 0.4%  | 299       | 0.9%  |
| mmu-mir-103-1-5p | 11  | 35595949 | 35595971 | +      | edit     | 20       | 0        | 0.0%  | 0         | 0.0%  | 0         | 0.0%  |
| mmu-mir-103-1-5p | 11  | 35595949 | 35595971 | +      | edit     | 21       | 44       | 0.1%  | 4         | 0.0%  | 35        | 0.1%  |
| mmu-mir-103-1-5p | 11  | 35595949 | 35595971 | +      | edit     | 22       | 6        | 0.0%  | 0         | 0.0%  | 7         | 0.0%  |
| mmu-mir-103-1-5p | 11  | 35595949 | 35595971 | +      | edit     | 23       | 14       | 0.0%  | 3         | 0.0%  | 18        | 0.1%  |
| EDITED           |     |          |          |        |          |          | 774      | 1.4%  | 351       | 0.9%  | 574       | 1.7%  |
| CANONICAL        |     |          |          |        |          |          | 54312    | 98.6% | 38098     | 99.1% | 32978     | 98.3% |
| TOTAL            |     |          |          |        |          |          | 55086    |       | 38449     |       | 33552     |       |



| miRNA            | Chr | Start     | Stop      | Strand | Type     | Position | P7 reads | P7%   | P10 reads | P10%  | P14 reads | P14%  |
|------------------|-----|-----------|-----------|--------|----------|----------|----------|-------|-----------|-------|-----------|-------|
| mmu-mir-103-2-5p | 2   | 131113839 | 131113861 | +      | 3' Edit  | 3'       | 390      | 0.7%  | 0         | 0.0%  | 479       | 1.3%  |
| mmu-mir-103-2-5p | 2   | 131113839 | 131113861 | +      | 3' Indel | 3'       | 21       | 0.0%  | 0         | 0.0%  | 12        | 0.0%  |
| mmu-mir-103-2-5p | 2   | 131113839 | 131113861 | +      | Indel    | 20       | 4        | 0.0%  | 0         | 0.0%  | 0         | 0.0%  |
| mmu-mir-103-2-5p | 2   | 131113839 | 131113861 | +      | Indel    | 21       | 10       | 0.0%  | 0         | 0.0%  | 3         | 0.0%  |
| mmu-mir-103-2-5p | 2   | 131113839 | 131113861 | +      | Indel    | 22       | 0        | 0.0%  | 0         | 0.0%  | 0         | 0.0%  |
| mmu-mir-103-2-5p | 2   | 131113839 | 131113861 | +      | Indel    | 23       | 14       | 0.0%  | 0         | 0.0%  | 8         | 0.0%  |
| mmu-mir-103-2-5p | 2   | 131113839 | 131113861 | +      | edit     | 1        | 0        | 0.0%  | 0         | 0.0%  | 0         | 0.0%  |
| mmu-mir-103-2-5p | 2   | 131113839 | 131113861 | +      | edit     | 2        | 0        | 0.0%  | 0         | 0.0%  | 0         | 0.0%  |
| mmu-mir-103-2-5p | 2   | 131113839 | 131113861 | +      | edit     | 3        | 0        | 0.0%  | 0         | 0.0%  | 0         | 0.0%  |
| mmu-mir-103-2-5p | 2   | 131113839 | 131113861 | +      | edit     | 4        | 12       | 0.0%  | 30        | 0.1%  | 6         | 0.0%  |
| mmu-mir-103-2-5p | 2   | 131113839 | 131113861 | +      | edit     | 5        | 0        | 0.0%  | 0         | 0.0%  | 0         | 0.0%  |
| mmu-mir-103-2-5p | 2   | 131113839 | 131113861 | +      | edit     | 6        | 34       | 0.1%  | 24        | 0.1%  | 35        | 0.1%  |
| mmu-mir-103-2-5p | 2   | 131113839 | 131113861 | +      | edit     | 7        | 0        | 0.0%  | 0         | 0.0%  | 0         | 0.0%  |
| mmu-mir-103-2-5p | 2   | 131113839 | 131113861 | +      | edit     | 8        | 58       | 0.1%  | 14        | 0.0%  | 17        | 0.0%  |
| mmu-mir-103-2-5p | 2   | 131113839 | 131113861 | +      | edit     | 9        | 0        | 0.0%  | 0         | 0.0%  | 0         | 0.0%  |
| mmu-mir-103-2-5p | 2   | 131113839 | 131113861 | +      | edit     | 10       | 3        | 0.0%  | 0         | 0.0%  | 0         | 0.0%  |
| mmu-mir-103-2-5p | 2   | 131113839 | 131113861 | +      | edit     | 11       | 4        | 0.0%  | 0         | 0.0%  | 0         | 0.0%  |
| mmu-mir-103-2-5p | 2   | 131113839 | 131113861 | +      | edit     | 12       | 0        | 0.0%  | 0         | 0.0%  | 0         | 0.0%  |
| mmu-mir-103-2-5p | 2   | 131113839 | 131113861 | +      | edit     | 13       | 9        | 0.0%  | 3         | 0.0%  | 6         | 0.0%  |
| mmu-mir-103-2-5p | 2   | 131113839 | 131113861 | +      | edit     | 14       | 0        | 0.0%  | 0         | 0.0%  | 0         | 0.0%  |
| mmu-mir-103-2-5p | 2   | 131113839 | 131113861 | +      | edit     | 15       | 134      | 0.2%  | 96        | 0.2%  | 102       | 0.3%  |
| mmu-mir-103-2-5p | 2   | 131113839 | 131113861 | +      | edit     | 16       | 79       | 0.1%  | 36        | 0.1%  | 16        | 0.0%  |
| mmu-mir-103-2-5p | 2   | 131113839 | 131113861 | +      | edit     | 17       | 20       | 0.0%  | 3         | 0.0%  | 21        | 0.1%  |
| mmu-mir-103-2-5p | 2   | 131113839 | 131113861 | +      | edit     | 18       | 0        | 0.0%  | 0         | 0.0%  | 0         | 0.0%  |
| mmu-mir-103-2-5p | 2   | 131113839 | 131113861 | +      | edit     | 19       | 381      | 0.7%  | 159       | 0.4%  | 334       | 0.9%  |
| mmu-mir-103-2-5p | 2   | 131113839 | 131113861 | +      | edit     | 20       | 3        | 0.0%  | 0         | 0.0%  | 0         | 0.0%  |
| mmu-mir-103-2-5p | 2   | 131113839 | 131113861 | +      | edit     | 21       | 131      | 0.2%  | 15        | 0.0%  | 105       | 0.3%  |
| mmu-mir-103-2-5p | 2   | 131113839 | 131113861 | +      | edit     | 22       | 61       | 0.1%  | 14        | 0.0%  | 38        | 0.1%  |
| mmu-mir-103-2-5p | 2   | 131113839 | 131113861 | +      | edit     | 23       | 9        | 0.0%  | 0         | 0.0%  | 12        | 0.0%  |
| EDITED           |     |           |           |        |          |          | 1375     | 2.4%  | 394       | 1.0%  | 1192      | 3.4%  |
| CANONICAL        |     |           |           |        |          |          | 56517    | 97.6% | 39005     | 99.0% | 34378     | 96.6% |
| TOTAL            |     |           |           |        |          |          | 57892    |       | 39399     |       | 35570     |       |

| miRNA           | Chr | Start     | Stop      | Strand | Type | Position | P7 reads | P7%   | P10 reads | P10%  | P14 reads | P14%   |
|-----------------|-----|-----------|-----------|--------|------|----------|----------|-------|-----------|-------|-----------|--------|
| mmu-mir-106b-3p | 5   | 138606974 | 138606995 | -      | edit | 1        | 0        | 0.0%  | 0         | 0.0%  | 0         | 0.0%   |
| mmu-mir-106b-3p | 5   | 138606974 | 138606995 | -      | edit | 2        | 0        | 0.0%  | 0         | 0.0%  | 0         | 0.0%   |
| mmu-mir-106b-3p | 5   | 138606974 | 138606995 | -      | edit | 3        | 0        | 0.0%  | 0         | 0.0%  | 0         | 0.0%   |
| mmu-mir-106b-3p | 5   | 138606974 | 138606995 | -      | edit | 4        | 0        | 0.0%  | 0         | 0.0%  | 0         | 0.0%   |
| mmu-mir-106b-3p | 5   | 138606974 | 138606995 | -      | edit | 5        | 0        | 0.0%  | 0         | 0.0%  | 0         | 0.0%   |
| mmu-mir-106b-3p | 5   | 138606974 | 138606995 | -      | edit | 6        | 0        | 0.0%  | 0         | 0.0%  | 0         | 0.0%   |
| mmu-mir-106b-3p | 5   | 138606974 | 138606995 | -      | edit | 7        | 0        | 0.0%  | 0         | 0.0%  | 0         | 0.0%   |
| mmu-mir-106b-3p | 5   | 138606974 | 138606995 | -      | edit | 8        | 0        | 0.0%  | 0         | 0.0%  | 0         | 0.0%   |
| mmu-mir-106b-3p | 5   | 138606974 | 138606995 | -      | edit | 9        | 0        | 0.0%  | 0         | 0.0%  | 0         | 0.0%   |
| mmu-mir-106b-3p | 5   | 138606974 | 138606995 | -      | edit | 10       | 0        | 0.0%  | 0         | 0.0%  | 0         | 0.0%   |
| mmu-mir-106b-3p | 5   | 138606974 | 138606995 | -      | edit | 11       | 0        | 0.0%  | 0         | 0.0%  | 0         | 0.0%   |
| mmu-mir-106b-3p | 5   | 138606974 | 138606995 | -      | edit | 12       | 0        | 0.0%  | 0         | 0.0%  | 0         | 0.0%   |
| mmu-mir-106b-3p | 5   | 138606974 | 138606995 | -      | edit | 13       | 4        | 0.9%  | 0         | 0.0%  | 0         | 0.0%   |
| mmu-mir-106b-3p | 5   | 138606974 | 138606995 | -      | edit | 14       | 0        | 0.0%  | 0         | 0.0%  | 0         | 0.0%   |
| mmu-mir-106b-3p | 5   | 138606974 | 138606995 | -      | edit | 15       | 8        | 1.8%  | 0         | 0.0%  | 0         | 0.0%   |
| mmu-mir-106b-3p | 5   | 138606974 | 138606995 | -      | edit | 16       | 0        | 0.0%  | 0         | 0.0%  | 0         | 0.0%   |
| mmu-mir-106b-3p | 5   | 138606974 | 138606995 | -      | edit | 17       | 0        | 0.0%  | 0         | 0.0%  | 0         | 0.0%   |
| mmu-mir-106b-3p | 5   | 138606974 | 138606995 | -      | edit | 18       | 0        | 0.0%  | 0         | 0.0%  | 0         | 0.0%   |
| mmu-mir-106b-3p | 5   | 138606974 | 138606995 | -      | edit | 19       | 0        | 0.0%  | 4         | 2.3%  | 0         | 0.0%   |
| mmu-mir-106b-3p | 5   | 138606974 | 138606995 | -      | edit | 20       | 0        | 0.0%  | 0         | 0.0%  | 0         | 0.0%   |
| mmu-mir-106b-3p | 5   | 138606974 | 138606995 | -      | edit | 21       | 0        | 0.0%  | 0         | 0.0%  | 0         | 0.0%   |
| mmu-mir-106b-3p | 5   | 138606974 | 138606995 | -      | edit | 22       | 0        | 0.0%  | 0         | 0.0%  | 0         | 0.0%   |
| EDITED          |     |           |           |        |      |          | 12       | 2.7%  | 4         | 2.3%  | 0         | 0.0%   |
| CANONICAL       |     |           |           |        |      |          | 417      | 97.3% | 170       | 97.7% | 116       | 100.0% |
| TOTAL           |     |           |           |        |      |          | 429      |       | 174       |       | 116       |        |

| miRNA          | Chr | Start    | Stop     | Strand | Type    | Position | P7 reads | P7%   | P10 reads | P10%  | P14 reads | P14%  |
|----------------|-----|----------|----------|--------|---------|----------|----------|-------|-----------|-------|-----------|-------|
| mmu-mir-107-5p | 19  | 34895190 | 34895212 | -      | 5' Edit | 5'       | 23       | 0.1%  | 0         | 0.0%  | 18        | 0.1%  |
| mmu-mir-107-5p | 19  | 34895190 | 34895212 | -      | Indel   | 21       | 8        | 0.0%  | 0         | 0.0%  | 3         | 0.0%  |
| mmu-mir-107-5p | 19  | 34895190 | 34895212 | -      | Indel   | 22       | 19       | 0.0%  | 0         | 0.0%  | 25        | 0.1%  |
| mmu-mir-107-5p | 19  | 34895190 | 34895212 | -      | Indel   | 23       | 6        | 0.0%  | 0         | 0.0%  | 0         | 0.0%  |
| mmu-mir-107-5p | 19  | 34895190 | 34895212 | -      | edit    | 1        | 0        | 0.0%  | 0         | 0.0%  | 0         | 0.0%  |
| mmu-mir-107-5p | 19  | 34895190 | 34895212 | -      | edit    | 2        | 0        | 0.0%  | 0         | 0.0%  | 0         | 0.0%  |
| mmu-mir-107-5p | 19  | 34895190 | 34895212 | -      | edit    | 3        | 0        | 0.0%  | 0         | 0.0%  | 0         | 0.0%  |
| mmu-mir-107-5p | 19  | 34895190 | 34895212 | -      | edit    | 4        | 0        | 0.0%  | 8         | 0.0%  | 0         | 0.0%  |
| mmu-mir-107-5p | 19  | 34895190 | 34895212 | -      | edit    | 5        | 4        | 0.0%  | 5         | 0.0%  | 0         | 0.0%  |
| mmu-mir-107-5p | 19  | 34895190 | 34895212 | -      | edit    | 6        | 29       | 0.1%  | 14        | 0.1%  | 14        | 0.1%  |
| mmu-mir-107-5p | 19  | 34895190 | 34895212 | -      | edit    | 7        | 0        | 0.0%  | 0         | 0.0%  | 0         | 0.0%  |
| mmu-mir-107-5p | 19  | 34895190 | 34895212 | -      | edit    | 8        | 7        | 0.0%  | 0         | 0.0%  | 0         | 0.0%  |
| mmu-mir-107-5p | 19  | 34895190 | 34895212 | -      | edit    | 9        | 0        | 0.0%  | 0         | 0.0%  | 0         | 0.0%  |
| mmu-mir-107-5p | 19  | 34895190 | 34895212 | -      | edit    | 10       | 0        | 0.0%  | 0         | 0.0%  | 0         | 0.0%  |
| mmu-mir-107-5p | 19  | 34895190 | 34895212 | -      | edit    | 11       | 0        | 0.0%  | 0         | 0.0%  | 0         | 0.0%  |
| mmu-mir-107-5p | 19  | 34895190 | 34895212 | -      | edit    | 12       | 0        | 0.0%  | 0         | 0.0%  | 0         | 0.0%  |
| mmu-mir-107-5p | 19  | 34895190 | 34895212 | -      | edit    | 13       | 3        | 0.0%  | 0         | 0.0%  | 5         | 0.0%  |
| mmu-mir-107-5p | 19  | 34895190 | 34895212 | -      | edit    | 14       | 0        | 0.0%  | 0         | 0.0%  | 0         | 0.0%  |
| mmu-mir-107-5p | 19  | 34895190 | 34895212 | -      | edit    | 15       | 72       | 0.2%  | 53        | 0.2%  | 47        | 0.3%  |
| mmu-mir-107-5p | 19  | 34895190 | 34895212 | -      | edit    | 16       | 73       | 0.2%  | 29        | 0.1%  | 9         | 0.0%  |
| mmu-mir-107-5p | 19  | 34895190 | 34895212 | -      | edit    | 17       | 71       | 0.2%  | 24        | 0.1%  | 32        | 0.2%  |
| mmu-mir-107-5p | 19  | 34895190 | 34895212 | -      | edit    | 18       | 95       | 0.2%  | 105       | 0.4%  | 68        | 0.4%  |
| mmu-mir-107-5p | 19  | 34895190 | 34895212 | -      | edit    | 19       | 120      | 0.3%  | 38        | 0.1%  | 67        | 0.4%  |
| mmu-mir-107-5p | 19  | 34895190 | 34895212 | -      | edit    | 20       | 21       | 0.1%  | 68        | 0.3%  | 14        | 0.1%  |
| mmu-mir-107-5p | 19  | 34895190 | 34895212 | -      | edit    | 21       | 44       | 0.1%  | 3         | 0.0%  | 15        | 0.1%  |
| mmu-mir-107-5p | 19  | 34895190 | 34895212 | -      | edit    | 22       | 26       | 0.1%  | 6         | 0.0%  | 17        | 0.1%  |
| EDITED         |     |          |          |        |         |          | 621      | 1.6%  | 352       | 1.3%  | 333       | 1.9%  |
| CANONICAL      |     |          |          |        |         |          | 39174    | 98.4% | 26183     | 98.7% | 17078     | 98.1% |
| TOTAL          |     |          |          |        |         |          | 39795    |       | 26535     |       | 17411     |       |

| miRNA          | Chr | Start    | Stop     | Strand | Type | Position | P7 reads | P7%   | P10 reads | P10%   | P14 reads | P14%   |
|----------------|-----|----------|----------|--------|------|----------|----------|-------|-----------|--------|-----------|--------|
| mmu-mir-122-5p | 18  | 65408520 | 65408541 | +      | edit | 1        | 0        | 0.0%  | 0         | 0.0%   | 0         | 0.0%   |
| mmu-mir-122-5p | 18  | 65408520 | 65408541 | +      | edit | 2        | 0        | 0.0%  | 0         | 0.0%   | 0         | 0.0%   |
| mmu-mir-122-5p | 18  | 65408520 | 65408541 | +      | edit | 3        | 0        | 0.0%  | 0         | 0.0%   | 0         | 0.0%   |
| mmu-mir-122-5p | 18  | 65408520 | 65408541 | +      | edit | 4        | 0        | 0.0%  | 0         | 0.0%   | 0         | 0.0%   |
| mmu-mir-122-5p | 18  | 65408520 | 65408541 | +      | edit | 5        | 0        | 0.0%  | 0         | 0.0%   | 0         | 0.0%   |
| mmu-mir-122-5p | 18  | 65408520 | 65408541 | +      | edit | 6        | 0        | 0.0%  | 0         | 0.0%   | 0         | 0.0%   |
| mmu-mir-122-5p | 18  | 65408520 | 65408541 | +      | edit | 7        | 0        | 0.0%  | 0         | 0.0%   | 0         | 0.0%   |
| mmu-mir-122-5p | 18  | 65408520 | 65408541 | +      | edit | 8        | 3        | 0.4%  | 0         | 0.0%   | 0         | 0.0%   |
| mmu-mir-122-5p | 18  | 65408520 | 65408541 | +      | edit | 9        | 0        | 0.0%  | 0         | 0.0%   | 0         | 0.0%   |
| mmu-mir-122-5p | 18  | 65408520 | 65408541 | +      | edit | 10       | 0        | 0.0%  | 0         | 0.0%   | 0         | 0.0%   |
| mmu-mir-122-5p | 18  | 65408520 | 65408541 | +      | edit | 11       | 0        | 0.0%  | 0         | 0.0%   | 0         | 0.0%   |
| mmu-mir-122-5p | 18  | 65408520 | 65408541 | +      | edit | 12       | 0        | 0.0%  | 0         | 0.0%   | 0         | 0.0%   |
| mmu-mir-122-5p | 18  | 65408520 | 65408541 | +      | edit | 13       | 0        | 0.0%  | 0         | 0.0%   | 0         | 0.0%   |
| mmu-mir-122-5p | 18  | 65408520 | 65408541 | +      | edit | 14       | 0        | 0.0%  | 0         | 0.0%   | 0         | 0.0%   |
| mmu-mir-122-5p | 18  | 65408520 | 65408541 | +      | edit | 15       | 0        | 0.0%  | 0         | 0.0%   | 0         | 0.0%   |
| mmu-mir-122-5p | 18  | 65408520 | 65408541 | +      | edit | 16       | 0        | 0.0%  | 0         | 0.0%   | 0         | 0.0%   |
| mmu-mir-122-5p | 18  | 65408520 | 65408541 | +      | edit | 17       | 0        | 0.0%  | 0         | 0.0%   | 0         | 0.0%   |
| mmu-mir-122-5p | 18  | 65408520 | 65408541 | +      | edit | 18       | 0        | 0.0%  | 0         | 0.0%   | 0         | 0.0%   |
| mmu-mir-122-5p | 18  | 65408520 | 65408541 | +      | edit | 19       | 7        | 0.9%  | 0         | 0.0%   | 0         | 0.0%   |
| mmu-mir-122-5p | 18  | 65408520 | 65408541 | +      | edit | 20       | 0        | 0.0%  | 0         | 0.0%   | 0         | 0.0%   |
| mmu-mir-122-5p | 18  | 65408520 | 65408541 | +      | edit | 21       | 0        | 0.0%  | 0         | 0.0%   | 0         | 0.0%   |
| mmu-mir-122-5p | 18  | 65408520 | 65408541 | +      | edit | 22       | 8        | 1.1%  | 0         | 0.0%   | 0         | 0.0%   |
| EDITED         |     |          |          |        |      |          | 18       | 2.4%  | 0         | 0.0%   | 0         | 0.0%   |
| CANONICAL      |     |          |          |        |      |          | 739      | 97.6% | 25        | 100.0% | 6         | 100.0% |
| TOTAL          |     |          |          |        |      |          | 757      |       | 25        |        | 6         |        |

| miRNA           | Chr | Start    | Stop     | Strand | Type | Position | P7 reads | P7%   | P10 reads | P10%  | P14 reads | P14%  |
|-----------------|-----|----------|----------|--------|------|----------|----------|-------|-----------|-------|-----------|-------|
| mmu-mir-125a-5p | 17  | 17967781 | 17967804 | +      | edit | 1        | 0        | 0.0%  | 0         | 0.0%  | 0         | 0.0%  |
| mmu-mir-125a-5p | 17  | 17967781 | 17967804 | +      | edit | 2        | 0        | 0.0%  | 0         | 0.0%  | 0         | 0.0%  |
| mmu-mir-125a-5p | 17  | 17967781 | 17967804 | +      | edit | 3        | 0        | 0.0%  | 0         | 0.0%  | 0         | 0.0%  |
| mmu-mir-125a-5p | 17  | 17967781 | 17967804 | +      | edit | 4        | 0        | 0.0%  | 0         | 0.0%  | 0         | 0.0%  |
| mmu-mir-125a-5p | 17  | 17967781 | 17967804 | +      | edit | 5        | 0        | 0.0%  | 0         | 0.0%  | 0         | 0.0%  |
| mmu-mir-125a-5p | 17  | 17967781 | 17967804 | +      | edit | 6        | 0        | 0.0%  | 3         | 0.1%  | 0         | 0.0%  |
| mmu-mir-125a-5p | 17  | 17967781 | 17967804 | +      | edit | 7        | 0        | 0.0%  | 0         | 0.0%  | 0         | 0.0%  |
| mmu-mir-125a-5p | 17  | 17967781 | 17967804 | +      | edit | 8        | 3        | 0.1%  | 0         | 0.0%  | 0         | 0.0%  |
| mmu-mir-125a-5p | 17  | 17967781 | 17967804 | +      | edit | 9        | 0        | 0.0%  | 0         | 0.0%  | 0         | 0.0%  |
| mmu-mir-125a-5p | 17  | 17967781 | 17967804 | +      | edit | 10       | 0        | 0.0%  | 0         | 0.0%  | 0         | 0.0%  |
| mmu-mir-125a-5p | 17  | 17967781 | 17967804 | +      | edit | 11       | 0        | 0.0%  | 0         | 0.0%  | 0         | 0.0%  |
| mmu-mir-125a-5p | 17  | 17967781 | 17967804 | +      | edit | 12       | 0        | 0.0%  | 0         | 0.0%  | 0         | 0.0%  |
| mmu-mir-125a-5p | 17  | 17967781 | 17967804 | +      | edit | 13       | 0        | 0.0%  | 0         | 0.0%  | 0         | 0.0%  |
| mmu-mir-125a-5p | 17  | 17967781 | 17967804 | +      | edit | 14       | 0        | 0.0%  | 0         | 0.0%  | 0         | 0.0%  |
| mmu-mir-125a-5p | 17  | 17967781 | 17967804 | +      | edit | 15       | 9        | 0.2%  | 0         | 0.0%  | 0         | 0.0%  |
| mmu-mir-125a-5p | 17  | 17967781 | 17967804 | +      | edit | 16       | 0        | 0.0%  | 0         | 0.0%  | 0         | 0.0%  |
| mmu-mir-125a-5p | 17  | 17967781 | 17967804 | +      | edit | 17       | 0        | 0.0%  | 7         | 0.3%  | 0         | 0.0%  |
| mmu-mir-125a-5p | 17  | 17967781 | 17967804 | +      | edit | 18       | 0        | 0.0%  | 0         | 0.0%  | 0         | 0.0%  |
| mmu-mir-125a-5p | 17  | 17967781 | 17967804 | +      | edit | 19       | 33       | 0.8%  | 12        | 0.5%  | 7         | 0.8%  |
| mmu-mir-125a-5p | 17  | 17967781 | 17967804 | +      | edit | 20       | 0        | 0.0%  | 0         | 0.0%  | 0         | 0.0%  |
| mmu-mir-125a-5p | 17  | 17967781 | 17967804 | +      | edit | 21       | 0        | 0.0%  | 0         | 0.0%  | 0         | 0.0%  |
| mmu-mir-125a-5p | 17  | 17967781 | 17967804 | +      | edit | 22       | 0        | 0.0%  | 0         | 0.0%  | 0         | 0.0%  |
|                 |     |          |          |        |      |          | 45       | 1.1%  | 22        | 0.9%  | 7         | 0.8%  |
|                 |     |          |          |        |      |          | 4081     | 98.9% | 2253      | 99.1% | 782       | 99.2% |
|                 |     |          |          |        |      |          | 4126     |       | 2275      |       | 789       |       |

| miRNA             | Chr | Start    | Stop     | Strand | Type     | Position | P7 reads | P7%   | P10 reads | P10%  | P14 reads | P14%  |
|-------------------|-----|----------|----------|--------|----------|----------|----------|-------|-----------|-------|-----------|-------|
| mmu-mir-125b-1-5p | 9   | 41390023 | 41390044 | +      | 3' Indel | 3'       | 17       | 0.5%  | 0         | 0.0%  | 15        | 1.2%  |
| mmu-mir-125b-1-5p | 9   | 41390023 | 41390044 | +      | edit     | 1        | 0        | 0.0%  | 0         | 0.0%  | 0         | 0.0%  |
| mmu-mir-125b-1-5p | 9   | 41390023 | 41390044 | +      | edit     | 2        | 0        | 0.0%  | 0         | 0.0%  | 0         | 0.0%  |
| mmu-mir-125b-1-5p | 9   | 41390023 | 41390044 | +      | edit     | 3        | 0        | 0.0%  | 0         | 0.0%  | 0         | 0.0%  |
| mmu-mir-125b-1-5p | 9   | 41390023 | 41390044 | +      | edit     | 4        | 3        | 0.1%  | 0         | 0.0%  | 0         | 0.0%  |
| mmu-mir-125b-1-5p | 9   | 41390023 | 41390044 | +      | edit     | 5        | 0        | 0.0%  | 0         | 0.0%  | 0         | 0.0%  |
| mmu-mir-125b-1-5p | 9   | 41390023 | 41390044 | +      | edit     | 6        | 0        | 0.0%  | 0         | 0.0%  | 0         | 0.0%  |
| mmu-mir-125b-1-5p | 9   | 41390023 | 41390044 | +      | edit     | 7        | 0        | 0.0%  | 0         | 0.0%  | 0         | 0.0%  |
| mmu-mir-125b-1-5p | 9   | 41390023 | 41390044 | +      | edit     | 8        | 0        | 0.0%  | 0         | 0.0%  | 0         | 0.0%  |
| mmu-mir-125b-1-5p | 9   | 41390023 | 41390044 | +      | edit     | 9        | 0        | 0.0%  | 0         | 0.0%  | 0         | 0.0%  |
| mmu-mir-125b-1-5p | 9   | 41390023 | 41390044 | +      | edit     | 10       | 0        | 0.0%  | 0         | 0.0%  | 0         | 0.0%  |
| mmu-mir-125b-1-5p | 9   | 41390023 | 41390044 | +      | edit     | 11       | 0        | 0.0%  | 0         | 0.0%  | 0         | 0.0%  |
| mmu-mir-125b-1-5p | 9   | 41390023 | 41390044 | +      | edit     | 12       | 0        | 0.0%  | 0         | 0.0%  | 0         | 0.0%  |
| mmu-mir-125b-1-5p | 9   | 41390023 | 41390044 | +      | edit     | 13       | 0        | 0.0%  | 0         | 0.0%  | 0         | 0.0%  |
| mmu-mir-125b-1-5p | 9   | 41390023 | 41390044 | +      | edit     | 14       | 0        | 0.0%  | 0         | 0.0%  | 0         | 0.0%  |
| mmu-mir-125b-1-5p | 9   | 41390023 | 41390044 | +      | edit     | 15       | 0        | 0.0%  | 18        | 0.7%  | 0         | 0.0%  |
| mmu-mir-125b-1-5p | 9   | 41390023 | 41390044 | +      | edit     | 16       | 0        | 0.0%  | 0         | 0.0%  | 0         | 0.0%  |
| mmu-mir-125b-1-5p | 9   | 41390023 | 41390044 | +      | edit     | 17       | 0        | 0.0%  | 0         | 0.0%  | 0         | 0.0%  |
| mmu-mir-125b-1-5p | 9   | 41390023 | 41390044 | +      | edit     | 18       | 0        | 0.0%  | 0         | 0.0%  | 0         | 0.0%  |
| mmu-mir-125b-1-5p | 9   | 41390023 | 41390044 | +      | edit     | 19       | 7        | 0.2%  | 0         | 0.0%  | 0         | 0.0%  |
| mmu-mir-125b-1-5p | 9   | 41390023 | 41390044 | +      | edit     | 20       | 0        | 0.0%  | 0         | 0.0%  | 0         | 0.0%  |
| mmu-mir-125b-1-5p | 9   | 41390023 | 41390044 | +      | edit     | 21       | 0        | 0.0%  | 0         | 0.0%  | 0         | 0.0%  |
| mmu-mir-125b-1-5p | 9   | 41390023 | 41390044 | +      | edit     | 22       | 9        | 0.3%  | 0         | 0.0%  | 6         | 0.5%  |
| EDITED            |     |          |          |        |          |          | 36       | 1.1%  | 18        | 0.7%  | 21        | 1.7%  |
| CANONICAL         |     |          |          |        |          |          | 3329     | 98.9% | 2483      | 99.3% | 1237      | 98.3% |
| TOTAL             |     |          |          |        |          |          | 3365     |       | 2501      |       | 1258      |       |

| miRNA             | Chr | Start    | Stop     | Strand | Type  | Position | P7 reads | P7%   | P10 reads | P10%  | P14 reads | P14%  |
|-------------------|-----|----------|----------|--------|-------|----------|----------|-------|-----------|-------|-----------|-------|
| mmu-mir-125b-2-5p | 16  | 77646524 | 77646545 | +      | Indel | 22       | 6        | 0.2%  | 6         | 0.2%  | 0         | 0.0%  |
| mmu-mir-125b-2-5p | 16  | 77646524 | 77646545 | +      | edit  | 1        | 0        | 0.0%  | 0         | 0.0%  | 0         | 0.0%  |
| mmu-mir-125b-2-5p | 16  | 77646524 | 77646545 | +      | edit  | 2        | 0        | 0.0%  | 0         | 0.0%  | 0         | 0.0%  |
| mmu-mir-125b-2-5p | 16  | 77646524 | 77646545 | +      | edit  | 3        | 0        | 0.0%  | 0         | 0.0%  | 0         | 0.0%  |
| mmu-mir-125b-2-5p | 16  | 77646524 | 77646545 | +      | edit  | 4        | 3        | 0.1%  | 0         | 0.0%  | 0         | 0.0%  |
| mmu-mir-125b-2-5p | 16  | 77646524 | 77646545 | +      | edit  | 5        | 0        | 0.0%  | 0         | 0.0%  | 0         | 0.0%  |
| mmu-mir-125b-2-5p | 16  | 77646524 | 77646545 | +      | edit  | 6        | 0        | 0.0%  | 0         | 0.0%  | 0         | 0.0%  |
| mmu-mir-125b-2-5p | 16  | 77646524 | 77646545 | +      | edit  | 7        | 0        | 0.0%  | 0         | 0.0%  | 0         | 0.0%  |
| mmu-mir-125b-2-5p | 16  | 77646524 | 77646545 | +      | edit  | 8        | 0        | 0.0%  | 0         | 0.0%  | 0         | 0.0%  |
| mmu-mir-125b-2-5p | 16  | 77646524 | 77646545 | +      | edit  | 9        | 0        | 0.0%  | 0         | 0.0%  | 0         | 0.0%  |
| mmu-mir-125b-2-5p | 16  | 77646524 | 77646545 | +      | edit  | 10       | 0        | 0.0%  | 0         | 0.0%  | 0         | 0.0%  |
| mmu-mir-125b-2-5p | 16  | 77646524 | 77646545 | +      | edit  | 11       | 0        | 0.0%  | 0         | 0.0%  | 0         | 0.0%  |
| mmu-mir-125b-2-5p | 16  | 77646524 | 77646545 | +      | edit  | 12       | 0        | 0.0%  | 0         | 0.0%  | 0         | 0.0%  |
| mmu-mir-125b-2-5p | 16  | 77646524 | 77646545 | +      | edit  | 13       | 0        | 0.0%  | 0         | 0.0%  | 0         | 0.0%  |
| mmu-mir-125b-2-5p | 16  | 77646524 | 77646545 | +      | edit  | 14       | 0        | 0.0%  | 0         | 0.0%  | 0         | 0.0%  |
| mmu-mir-125b-2-5p | 16  | 77646524 | 77646545 | +      | edit  | 15       | 0        | 0.0%  | 14        | 0.6%  | 0         | 0.0%  |
| mmu-mir-125b-2-5p | 16  | 77646524 | 77646545 | +      | edit  | 16       | 0        | 0.0%  | 0         | 0.0%  | 0         | 0.0%  |
| mmu-mir-125b-2-5p | 16  | 77646524 | 77646545 | +      | edit  | 17       | 0        | 0.0%  | 0         | 0.0%  | 0         | 0.0%  |
| mmu-mir-125b-2-5p | 16  | 77646524 | 77646545 | +      | edit  | 18       | 0        | 0.0%  | 0         | 0.0%  | 0         | 0.0%  |
| mmu-mir-125b-2-5p | 16  | 77646524 | 77646545 | +      | edit  | 19       | 4        | 0.1%  | 0         | 0.0%  | 0         | 0.0%  |
| mmu-mir-125b-2-5p | 16  | 77646524 | 77646545 | +      | edit  | 20       | 0        | 0.0%  | 0         | 0.0%  | 0         | 0.0%  |
| mmu-mir-125b-2-5p | 16  | 77646524 | 77646545 | +      | edit  | 21       | 0        | 0.0%  | 0         | 0.0%  | 0         | 0.0%  |
| mmu-mir-125b-2-5p | 16  | 77646524 | 77646545 | +      | edit  | 22       | 0        | 0.0%  | 3         | 0.1%  | 3         | 0.3%  |
| EDITED            |     |          |          |        |       |          | 12       | 0.4%  | 36        | 1.6%  | 36        | 3.4%  |
| CANONICAL         |     |          |          |        |       |          | 2922     | 99.6% | 2195      | 98.4% | 1028      | 96.6% |
| TOTAL             |     |          |          |        |       |          | 2934     |       | 2231      |       | 1064      |       |

| miRNA          | Chr | Start     | Stop      | Strand | Type     | Position | P7 reads | P7%   | P10 reads | P10%  | P14 reads | P14%  |
|----------------|-----|-----------|-----------|--------|----------|----------|----------|-------|-----------|-------|-----------|-------|
| mmu-mir-127-3p | 12  | 110831098 | 110831119 | +      | 3' Edit  | 3'       | 136      | 0.5%  | 0         | 0.0%  | 19        | 0.6%  |
| mmu-mir-127-3p | 12  | 110831098 | 110831119 | +      | 3' Indel | 3'       | 4        | 0.0%  | 0         | 0.0%  | 0         | 0.0%  |
| mmu-mir-127-3p | 12  | 110831098 | 110831119 | +      | 5' Indel | 5'       | 3        | 0.0%  | 0         | 0.0%  | 0         | 0.0%  |
| mmu-mir-127-3p | 12  | 110831098 | 110831119 | +      | Indel    | 20       | 3        | 0.0%  | 0         | 0.0%  | 0         | 0.0%  |
| mmu-mir-127-3p | 12  | 110831098 | 110831119 | +      | Indel    | 21       | 8        | 0.0%  | 9         | 0.1%  | 4         | 0.1%  |
| mmu-mir-127-3p | 12  | 110831098 | 110831119 | +      | Indel    | 22       | 13       | 0.0%  | 0         | 0.0%  | 0         | 0.0%  |
| mmu-mir-127-3p | 12  | 110831098 | 110831119 | +      | edit     | 1        | 0        | 0.0%  | 0         | 0.0%  | 0         | 0.0%  |
| mmu-mir-127-3p | 12  | 110831098 | 110831119 | +      | edit     | 2        | 0        | 0.0%  | 0         | 0.0%  | 0         | 0.0%  |
| mmu-mir-127-3p | 12  | 110831098 | 110831119 | +      | edit     | 3        | 0        | 0.0%  | 0         | 0.0%  | 0         | 0.0%  |
| mmu-mir-127-3p | 12  | 110831098 | 110831119 | +      | edit     | 4        | 3        | 0.0%  | 0         | 0.0%  | 0         | 0.0%  |
| mmu-mir-127-3p | 12  | 110831098 | 110831119 | +      | edit     | 5        | 0        | 0.0%  | 0         | 0.0%  | 0         | 0.0%  |
| mmu-mir-127-3p | 12  | 110831098 | 110831119 | +      | edit     | 6        | 10       | 0.0%  | 0         | 0.0%  | 0         | 0.0%  |
| mmu-mir-127-3p | 12  | 110831098 | 110831119 | +      | edit     | 7        | 0        | 0.0%  | 0         | 0.0%  | 0         | 0.0%  |
| mmu-mir-127-3p | 12  | 110831098 | 110831119 | +      | edit     | 8        | 24       | 0.1%  | 7         | 0.1%  | 0         | 0.0%  |
| mmu-mir-127-3p | 12  | 110831098 | 110831119 | +      | edit     | 9        | 0        | 0.0%  | 0         | 0.0%  | 0         | 0.0%  |
| mmu-mir-127-3p | 12  | 110831098 | 110831119 | +      | edit     | 10       | 0        | 0.0%  | 0         | 0.0%  | 0         | 0.0%  |
| mmu-mir-127-3p | 12  | 110831098 | 110831119 | +      | edit     | 11       | 0        | 0.0%  | 0         | 0.0%  | 0         | 0.0%  |
| mmu-mir-127-3p | 12  | 110831098 | 110831119 | +      | edit     | 12       | 0        | 0.0%  | 0         | 0.0%  | 0         | 0.0%  |
| mmu-mir-127-3p | 12  | 110831098 | 110831119 | +      | edit     | 13       | 0        | 0.0%  | 0         | 0.0%  | 0         | 0.0%  |
| mmu-mir-127-3p | 12  | 110831098 | 110831119 | +      | edit     | 14       | 0        | 0.0%  | 0         | 0.0%  | 0         | 0.0%  |
| mmu-mir-127-3p | 12  | 110831098 | 110831119 | +      | edit     | 15       | 39       | 0.1%  | 15        | 0.1%  | 0         | 0.0%  |
| mmu-mir-127-3p | 12  | 110831098 | 110831119 | +      | edit     | 16       | 0        | 0.0%  | 0         | 0.0%  | 0         | 0.0%  |
| mmu-mir-127-3p | 12  | 110831098 | 110831119 | +      | edit     | 17       | 0        | 0.0%  | 0         | 0.0%  | 0         | 0.0%  |
| mmu-mir-127-3p | 12  | 110831098 | 110831119 | +      | edit     | 18       | 0        | 0.0%  | 0         | 0.0%  | 0         | 0.0%  |
| mmu-mir-127-3p | 12  | 110831098 | 110831119 | +      | edit     | 19       | 65       | 0.2%  | 16        | 0.2%  | 4         | 0.1%  |
| mmu-mir-127-3p | 12  | 110831098 | 110831119 | +      | edit     | 20       | 0        | 0.0%  | 0         | 0.0%  | 0         | 0.0%  |
| mmu-mir-127-3p | 12  | 110831098 | 110831119 | +      | edit     | 21       | 6        | 0.0%  | 0         | 0.0%  | 3         | 0.1%  |
| mmu-mir-127-3p | 12  | 110831098 | 110831119 | +      | edit     | 22       | 0        | 0.0%  | 0         | 0.0%  | 0         | 0.0%  |
| EDITED         |     |           |           |        |          |          | 314      | 1.1%  | 47        | 0.5%  | 30        | 1.0%  |
| CANONICAL      |     |           |           |        |          |          | 27461    | 98.9% | 10153     | 99.5% | 3109      | 99.0% |
| TOTAL          |     |           |           |        |          |          | 27775    |       | 10200     |       | 3139      |       |



| miRNA          | Chr | Start     | Stop      | Strand | Type | Position | P7 reads | P7%   | P10 reads | P10%   | P14 reads | P14%   |
|----------------|-----|-----------|-----------|--------|------|----------|----------|-------|-----------|--------|-----------|--------|
| mmu-mir-127-5p | 12  | 110831064 | 110831085 | +      | edit | 1        | 0        | 0.0%  | 0         | 0.0%   | 0         | 0.0%   |
| mmu-mir-127-5p | 12  | 110831064 | 110831085 | +      | edit | 2        | 0        | 0.0%  | 0         | 0.0%   | 0         | 0.0%   |
| mmu-mir-127-5p | 12  | 110831064 | 110831085 | +      | edit | 3        | 0        | 0.0%  | 0         | 0.0%   | 0         | 0.0%   |
| mmu-mir-127-5p | 12  | 110831064 | 110831085 | +      | edit | 4        | 0        | 0.0%  | 0         | 0.0%   | 0         | 0.0%   |
| mmu-mir-127-5p | 12  | 110831064 | 110831085 | +      | edit | 5        | 0        | 0.0%  | 0         | 0.0%   | 0         | 0.0%   |
| mmu-mir-127-5p | 12  | 110831064 | 110831085 | +      | edit | 6        | 0        | 0.0%  | 0         | 0.0%   | 0         | 0.0%   |
| mmu-mir-127-5p | 12  | 110831064 | 110831085 | +      | edit | 7        | 0        | 0.0%  | 0         | 0.0%   | 0         | 0.0%   |
| mmu-mir-127-5p | 12  | 110831064 | 110831085 | +      | edit | 8        | 0        | 0.0%  | 0         | 0.0%   | 0         | 0.0%   |
| mmu-mir-127-5p | 12  | 110831064 | 110831085 | +      | edit | 9        | 0        | 0.0%  | 0         | 0.0%   | 0         | 0.0%   |
| mmu-mir-127-5p | 12  | 110831064 | 110831085 | +      | edit | 10       | 0        | 0.0%  | 0         | 0.0%   | 0         | 0.0%   |
| mmu-mir-127-5p | 12  | 110831064 | 110831085 | +      | edit | 11       | 0        | 0.0%  | 0         | 0.0%   | 0         | 0.0%   |
| mmu-mir-127-5p | 12  | 110831064 | 110831085 | +      | edit | 12       | 0        | 0.0%  | 0         | 0.0%   | 0         | 0.0%   |
| mmu-mir-127-5p | 12  | 110831064 | 110831085 | +      | edit | 13       | 0        | 0.0%  | 0         | 0.0%   | 0         | 0.0%   |
| mmu-mir-127-5p | 12  | 110831064 | 110831085 | +      | edit | 14       | 0        | 0.0%  | 0         | 0.0%   | 0         | 0.0%   |
| mmu-mir-127-5p | 12  | 110831064 | 110831085 | +      | edit | 15       | 0        | 0.0%  | 0         | 0.0%   | 0         | 0.0%   |
| mmu-mir-127-5p | 12  | 110831064 | 110831085 | +      | edit | 16       | 0        | 0.0%  | 0         | 0.0%   | 0         | 0.0%   |
| mmu-mir-127-5p | 12  | 110831064 | 110831085 | +      | edit | 17       | 0        | 0.0%  | 0         | 0.0%   | 0         | 0.0%   |
| mmu-mir-127-5p | 12  | 110831064 | 110831085 | +      | edit | 18       | 0        | 0.0%  | 0         | 0.0%   | 0         | 0.0%   |
| mmu-mir-127-5p | 12  | 110831064 | 110831085 | +      | edit | 19       | 0        | 0.0%  | 0         | 0.0%   | 0         | 0.0%   |
| mmu-mir-127-5p | 12  | 110831064 | 110831085 | +      | edit | 20       | 0        | 0.0%  | 0         | 0.0%   | 0         | 0.0%   |
| mmu-mir-127-5p | 12  | 110831064 | 110831085 | +      | edit | 21       | 3        | 0.5%  | 0         | 0.0%   | 0         | 0.0%   |
| mmu-mir-127-5p | 12  | 110831064 | 110831085 | +      | edit | 22       | 0        | 0.0%  | 0         | 0.0%   | 0         | 0.0%   |
| EDITED         |     |           |           |        |      |          | 3        | 0.5%  | 0         | 0.0%   | 0         | 0.0%   |
| CANONICAL      |     |           |           |        |      |          | 582      | 99.5% | 134       | 100.0% | 58        | 100.0% |
| TOTAL          |     |           |           |        |      |          | 585      |       | 134       |        | 58        |        |

| miRNA            | Chr | Start     | Stop      | Strand | Type | Position | P7 reads | P7%    | P10 reads | P10%  | P14 reads | P14%  |
|------------------|-----|-----------|-----------|--------|------|----------|----------|--------|-----------|-------|-----------|-------|
| mmu-mir-128-1-5p | 1   | 130098981 | 130099001 | +      | edit | 1        | 0        | 0.0%   | 0         | 0.0%  | 0         | 0.0%  |
| mmu-mir-128-1-5p | 1   | 130098981 | 130099001 | +      | edit | 2        | 0        | 0.0%   | 0         | 0.0%  | 0         | 0.0%  |
| mmu-mir-128-1-5p | 1   | 130098981 | 130099001 | +      | edit | 3        | 0        | 0.0%   | 0         | 0.0%  | 0         | 0.0%  |
| mmu-mir-128-1-5p | 1   | 130098981 | 130099001 | +      | edit | 4        | 0        | 0.0%   | 0         | 0.0%  | 0         | 0.0%  |
| mmu-mir-128-1-5p | 1   | 130098981 | 130099001 | +      | edit | 5        | 0        | 0.0%   | 0         | 0.0%  | 0         | 0.0%  |
| mmu-mir-128-1-5p | 1   | 130098981 | 130099001 | +      | edit | 6        | 0        | 0.0%   | 0         | 0.0%  | 0         | 0.0%  |
| mmu-mir-128-1-5p | 1   | 130098981 | 130099001 | +      | edit | 7        | 0        | 0.0%   | 0         | 0.0%  | 0         | 0.0%  |
| mmu-mir-128-1-5p | 1   | 130098981 | 130099001 | +      | edit | 8        | 0        | 0.0%   | 0         | 0.0%  | 0         | 0.0%  |
| mmu-mir-128-1-5p | 1   | 130098981 | 130099001 | +      | edit | 9        | 0        | 0.0%   | 0         | 0.0%  | 0         | 0.0%  |
| mmu-mir-128-1-5p | 1   | 130098981 | 130099001 | +      | edit | 10       | 0        | 0.0%   | 0         | 0.0%  | 0         | 0.0%  |
| mmu-mir-128-1-5p | 1   | 130098981 | 130099001 | +      | edit | 11       | 0        | 0.0%   | 0         | 0.0%  | 0         | 0.0%  |
| mmu-mir-128-1-5p | 1   | 130098981 | 130099001 | +      | edit | 12       | 0        | 0.0%   | 0         | 0.0%  | 0         | 0.0%  |
| mmu-mir-128-1-5p | 1   | 130098981 | 130099001 | +      | edit | 13       | 0        | 0.0%   | 0         | 0.0%  | 0         | 0.0%  |
| mmu-mir-128-1-5p | 1   | 130098981 | 130099001 | +      | edit | 14       | 0        | 0.0%   | 0         | 0.0%  | 0         | 0.0%  |
| mmu-mir-128-1-5p | 1   | 130098981 | 130099001 | +      | edit | 15       | 0        | 0.0%   | 4         | 0.5%  | 0         | 0.0%  |
| mmu-mir-128-1-5p | 1   | 130098981 | 130099001 | +      | edit | 16       | 0        | 0.0%   | 4         | 0.6%  | 4         | 1.0%  |
| mmu-mir-128-1-5p | 1   | 130098981 | 130099001 | +      | edit | 17       | 0        | 0.0%   | 0         | 0.0%  | 0         | 0.0%  |
| mmu-mir-128-1-5p | 1   | 130098981 | 130099001 | +      | edit | 18       | 0        | 0.0%   | 0         | 0.0%  | 0         | 0.0%  |
| mmu-mir-128-1-5p | 1   | 130098981 | 130099001 | +      | edit | 19       | 0        | 0.0%   | 0         | 0.0%  | 0         | 0.0%  |
| mmu-mir-128-1-5p | 1   | 130098981 | 130099001 | +      | edit | 20       | 0        | 0.0%   | 0         | 0.0%  | 0         | 0.0%  |
| mmu-mir-128-1-5p | 1   | 130098981 | 130099001 | +      | edit | 21       | 0        | 0.0%   | 0         | 0.0%  | 0         | 0.0%  |
| mmu-mir-128-1-5p | 1   | 130098981 | 130099001 | +      | edit | 22       | 0        | 0.0%   | 0         | 0.0%  | 0         | 0.0%  |
| EDITED           |     |           |           |        |      |          | 0        | 0.0%   | 8         | 1.2%  | 4         | 1.0%  |
| CANONICAL        |     |           |           |        |      |          | 716      | 100.0% | 631       | 98.8% | 385       | 99.0% |
| TOTAL            |     |           |           |        |      |          | 716      |        | 639       |       | 389       |       |

| miRNA            | Chr | Start     | Stop      | Strand | Type | Position | P7 reads | P7%    | P10 reads | P10%  | P14 reads | P14%  |
|------------------|-----|-----------|-----------|--------|------|----------|----------|--------|-----------|-------|-----------|-------|
| mmu-mir-128-2-5p | 9   | 112021148 | 112021168 | -      | edit | 1        | 0        | 0.0%   | 0         | 0.0%  | 0         | 0.0%  |
| mmu-mir-128-2-5p | 9   | 112021148 | 112021168 | -      | edit | 2        | 0        | 0.0%   | 0         | 0.0%  | 0         | 0.0%  |
| mmu-mir-128-2-5p | 9   | 112021148 | 112021168 | -      | edit | 3        | 0        | 0.0%   | 0         | 0.0%  | 0         | 0.0%  |
| mmu-mir-128-2-5p | 9   | 112021148 | 112021168 | -      | edit | 4        | 0        | 0.0%   | 0         | 0.0%  | 0         | 0.0%  |
| mmu-mir-128-2-5p | 9   | 112021148 | 112021168 | -      | edit | 5        | 0        | 0.0%   | 0         | 0.0%  | 0         | 0.0%  |
| mmu-mir-128-2-5p | 9   | 112021148 | 112021168 | -      | edit | 6        | 0        | 0.0%   | 0         | 0.0%  | 0         | 0.0%  |
| mmu-mir-128-2-5p | 9   | 112021148 | 112021168 | -      | edit | 7        | 0        | 0.0%   | 0         | 0.0%  | 0         | 0.0%  |
| mmu-mir-128-2-5p | 9   | 112021148 | 112021168 | -      | edit | 8        | 0        | 0.0%   | 0         | 0.0%  | 0         | 0.0%  |
| mmu-mir-128-2-5p | 9   | 112021148 | 112021168 | -      | edit | 9        | 0        | 0.0%   | 0         | 0.0%  | 0         | 0.0%  |
| mmu-mir-128-2-5p | 9   | 112021148 | 112021168 | -      | edit | 10       | 0        | 0.0%   | 0         | 0.0%  | 0         | 0.0%  |
| mmu-mir-128-2-5p | 9   | 112021148 | 112021168 | -      | edit | 11       | 0        | 0.0%   | 0         | 0.0%  | 0         | 0.0%  |
| mmu-mir-128-2-5p | 9   | 112021148 | 112021168 | -      | edit | 12       | 0        | 0.0%   | 0         | 0.0%  | 0         | 0.0%  |
| mmu-mir-128-2-5p | 9   | 112021148 | 112021168 | -      | edit | 13       | 0        | 0.0%   | 0         | 0.0%  | 0         | 0.0%  |
| mmu-mir-128-2-5p | 9   | 112021148 | 112021168 | -      | edit | 14       | 0        | 0.0%   | 0         | 0.0%  | 0         | 0.0%  |
| mmu-mir-128-2-5p | 9   | 112021148 | 112021168 | -      | edit | 15       | 0        | 0.0%   | 0         | 0.0%  | 0         | 0.0%  |
| mmu-mir-128-2-5p | 9   | 112021148 | 112021168 | -      | edit | 16       | 0        | 0.0%   | 4         | 0.8%  | 4         | 1.5%  |
| mmu-mir-128-2-5p | 9   | 112021148 | 112021168 | -      | edit | 17       | 0        | 0.0%   | 0         | 0.0%  | 0         | 0.0%  |
| mmu-mir-128-2-5p | 9   | 112021148 | 112021168 | -      | edit | 18       | 0        | 0.0%   | 0         | 0.0%  | 0         | 0.0%  |
| mmu-mir-128-2-5p | 9   | 112021148 | 112021168 | -      | edit | 19       | 0        | 0.0%   | 0         | 0.0%  | 0         | 0.0%  |
| mmu-mir-128-2-5p | 9   | 112021148 | 112021168 | -      | edit | 20       | 0        | 0.0%   | 0         | 0.0%  | 0         | 0.0%  |
| mmu-mir-128-2-5p | 9   | 112021148 | 112021168 | -      | edit | 21       | 0        | 0.0%   | 0         | 0.0%  | 0         | 0.0%  |
| mmu-mir-128-2-5p | 9   | 112021148 | 112021168 | -      | edit | 22       | 0        | 0.0%   | 0         | 0.0%  | 0         | 0.0%  |
| EDITED           |     |           |           |        |      |          | 0        | 0.0%   | 4         | 0.8%  | 4         | 1.5%  |
| CANONICAL        |     |           |           |        |      |          | 498      | 100.0% | 469       | 99.2% | 260       | 98.5% |
| TOTAL            |     |           |           |        |      |          | 498      |        | 473       |       | 264       |       |

| miRNA           | Chr | Start    | Stop     | Strand | Type | Position | P7 reads | P7%   | P10 reads | P10%  | P14 reads | P14%  |
|-----------------|-----|----------|----------|--------|------|----------|----------|-------|-----------|-------|-----------|-------|
| mmu-mir-130a-5p | 2   | 84581273 | 84581294 | -      | edit | 1        | 0        | 0.0%  | 0         | 0.0%  | 0         | 0.0%  |
| mmu-mir-130a-5p | 2   | 84581273 | 84581294 | -      | edit | 2        | 0        | 0.0%  | 0         | 0.0%  | 0         | 0.0%  |
| mmu-mir-130a-5p | 2   | 84581273 | 84581294 | -      | edit | 3        | 0        | 0.0%  | 0         | 0.0%  | 0         | 0.0%  |
| mmu-mir-130a-5p | 2   | 84581273 | 84581294 | -      | edit | 4        | 29       | 0.6%  | 5         | 0.3%  | 6         | 0.6%  |
| mmu-mir-130a-5p | 2   | 84581273 | 84581294 | -      | edit | 5        | 0        | 0.0%  | 0         | 0.0%  | 0         | 0.0%  |
| mmu-mir-130a-5p | 2   | 84581273 | 84581294 | -      | edit | 6        | 0        | 0.0%  | 0         | 0.0%  | 0         | 0.0%  |
| mmu-mir-130a-5p | 2   | 84581273 | 84581294 | -      | edit | 7        | 0        | 0.0%  | 0         | 0.0%  | 0         | 0.0%  |
| mmu-mir-130a-5p | 2   | 84581273 | 84581294 | -      | edit | 8        | 0        | 0.0%  | 0         | 0.0%  | 0         | 0.0%  |
| mmu-mir-130a-5p | 2   | 84581273 | 84581294 | -      | edit | 9        | 0        | 0.0%  | 0         | 0.0%  | 0         | 0.0%  |
| mmu-mir-130a-5p | 2   | 84581273 | 84581294 | -      | edit | 10       | 0        | 0.0%  | 0         | 0.0%  | 0         | 0.0%  |
| mmu-mir-130a-5p | 2   | 84581273 | 84581294 | -      | edit | 11       | 0        | 0.0%  | 0         | 0.0%  | 0         | 0.0%  |
| mmu-mir-130a-5p | 2   | 84581273 | 84581294 | -      | edit | 12       | 0        | 0.0%  | 0         | 0.0%  | 0         | 0.0%  |
| mmu-mir-130a-5p | 2   | 84581273 | 84581294 | -      | edit | 13       | 0        | 0.0%  | 0         | 0.0%  | 0         | 0.0%  |
| mmu-mir-130a-5p | 2   | 84581273 | 84581294 | -      | edit | 14       | 0        | 0.0%  | 0         | 0.0%  | 0         | 0.0%  |
| mmu-mir-130a-5p | 2   | 84581273 | 84581294 | -      | edit | 15       | 0        | 0.0%  | 13        | 0.8%  | 3         | 0.3%  |
| mmu-mir-130a-5p | 2   | 84581273 | 84581294 | -      | edit | 16       | 0        | 0.0%  | 0         | 0.0%  | 0         | 0.0%  |
| mmu-mir-130a-5p | 2   | 84581273 | 84581294 | -      | edit | 17       | 6        | 0.1%  | 0         | 0.0%  | 0         | 0.0%  |
| mmu-mir-130a-5p | 2   | 84581273 | 84581294 | -      | edit | 18       | 0        | 0.0%  | 0         | 0.0%  | 0         | 0.0%  |
| mmu-mir-130a-5p | 2   | 84581273 | 84581294 | -      | edit | 19       | 16       | 0.3%  | 4         | 0.2%  | 0         | 0.0%  |
| mmu-mir-130a-5p | 2   | 84581273 | 84581294 | -      | edit | 20       | 0        | 0.0%  | 0         | 0.0%  | 0         | 0.0%  |
| mmu-mir-130a-5p | 2   | 84581273 | 84581294 | -      | edit | 21       | 0        | 0.0%  | 0         | 0.0%  | 0         | 0.0%  |
| mmu-mir-130a-5p | 2   | 84581273 | 84581294 | -      | edit | 22       | 0        | 0.0%  | 0         | 0.0%  | 0         | 0.0%  |
| EDITED          |     |          |          |        |      |          | 51       | 1.0%  | 22        | 1.2%  | 9         | 0.9%  |
| CANONICAL       |     |          |          |        |      |          | 5126     | 99.0% | 1743      | 98.8% | 935       | 99.1% |
| TOTAL           |     |          |          |        |      |          | 5177     |       | 1765      |       | 944       |       |

| miRNA          | Chr | Start     | Stop      | Strand | Type | Position | P7 reads | P7%   | P10 reads | P10%   | P14 reads | P14%   |
|----------------|-----|-----------|-----------|--------|------|----------|----------|-------|-----------|--------|-----------|--------|
| mmu-mir-134-5p | 12  | 110972355 | 110972376 | +      | edit | 1        | 0        | 0.0%  | 0         | 0.0%   | 0         | 0.0%   |
| mmu-mir-134-5p | 12  | 110972355 | 110972376 | +      | edit | 2        | 0        | 0.0%  | 0         | 0.0%   | 0         | 0.0%   |
| mmu-mir-134-5p | 12  | 110972355 | 110972376 | +      | edit | 3        | 0        | 0.0%  | 0         | 0.0%   | 0         | 0.0%   |
| mmu-mir-134-5p | 12  | 110972355 | 110972376 | +      | edit | 4        | 0        | 0.0%  | 0         | 0.0%   | 0         | 0.0%   |
| mmu-mir-134-5p | 12  | 110972355 | 110972376 | +      | edit | 5        | 0        | 0.0%  | 0         | 0.0%   | 0         | 0.0%   |
| mmu-mir-134-5p | 12  | 110972355 | 110972376 | +      | edit | 6        | 0        | 0.0%  | 0         | 0.0%   | 0         | 0.0%   |
| mmu-mir-134-5p | 12  | 110972355 | 110972376 | +      | edit | 7        | 0        | 0.0%  | 0         | 0.0%   | 0         | 0.0%   |
| mmu-mir-134-5p | 12  | 110972355 | 110972376 | +      | edit | 8        | 0        | 0.0%  | 0         | 0.0%   | 0         | 0.0%   |
| mmu-mir-134-5p | 12  | 110972355 | 110972376 | +      | edit | 9        | 0        | 0.0%  | 0         | 0.0%   | 0         | 0.0%   |
| mmu-mir-134-5p | 12  | 110972355 | 110972376 | +      | edit | 10       | 0        | 0.0%  | 0         | 0.0%   | 0         | 0.0%   |
| mmu-mir-134-5p | 12  | 110972355 | 110972376 | +      | edit | 11       | 0        | 0.0%  | 0         | 0.0%   | 0         | 0.0%   |
| mmu-mir-134-5p | 12  | 110972355 | 110972376 | +      | edit | 12       | 0        | 0.0%  | 0         | 0.0%   | 0         | 0.0%   |
| mmu-mir-134-5p | 12  | 110972355 | 110972376 | +      | edit | 13       | 0        | 0.0%  | 0         | 0.0%   | 0         | 0.0%   |
| mmu-mir-134-5p | 12  | 110972355 | 110972376 | +      | edit | 14       | 0        | 0.0%  | 0         | 0.0%   | 0         | 0.0%   |
| mmu-mir-134-5p | 12  | 110972355 | 110972376 | +      | edit | 15       | 6        | 0.7%  | 0         | 0.0%   | 0         | 0.0%   |
| mmu-mir-134-5p | 12  | 110972355 | 110972376 | +      | edit | 16       | 0        | 0.0%  | 0         | 0.0%   | 0         | 0.0%   |
| mmu-mir-134-5p | 12  | 110972355 | 110972376 | +      | edit | 17       | 0        | 0.0%  | 0         | 0.0%   | 0         | 0.0%   |
| mmu-mir-134-5p | 12  | 110972355 | 110972376 | +      | edit | 18       | 0        | 0.0%  | 0         | 0.0%   | 0         | 0.0%   |
| mmu-mir-134-5p | 12  | 110972355 | 110972376 | +      | edit | 19       | 0        | 0.0%  | 0         | 0.0%   | 0         | 0.0%   |
| mmu-mir-134-5p | 12  | 110972355 | 110972376 | +      | edit | 20       | 0        | 0.0%  | 0         | 0.0%   | 0         | 0.0%   |
| mmu-mir-134-5p | 12  | 110972355 | 110972376 | +      | edit | 21       | 0        | 0.0%  | 0         | 0.0%   | 0         | 0.0%   |
| mmu-mir-134-5p | 12  | 110972355 | 110972376 | +      | edit | 22       | 0        | 0.0%  | 0         | 0.0%   | 0         | 0.0%   |
| EDITED         |     |           |           |        |      |          | 6        | 0.7%  | 0         | 0.0%   | 0         | 0.0%   |
| CANONICAL      |     |           |           |        |      |          | 759      | 99.3% | 210       | 100.0% | 67        | 100.0% |
| TOTAL          |     |           |           |        |      |          | 765      |       | 210       |        | 67        |        |

| miRNA          | Chr | Start     | Stop      | Strand | Type     | Position | P7 reads | P7%   | P10 reads | P10%  | P14 reads | P14%  |
|----------------|-----|-----------|-----------|--------|----------|----------|----------|-------|-----------|-------|-----------|-------|
| mmu-mir-140-3p | 8   | 110075188 | 110075208 | +      | 3' Edit  | 3'       | 90       | 0.1%  | 0         | 0.0%  | 59        | 0.3%  |
| mmu-mir-140-3p | 8   | 110075188 | 110075208 | +      | 3' Indel | 3'       | 6        | 0.0%  | 0         | 0.0%  | 7         | 0.0%  |
| mmu-mir-140-3p | 8   | 110075188 | 110075208 | +      | Indel    | 21       | 4        | 0.0%  | 0         | 0.0%  | 5         | 0.0%  |
| mmu-mir-140-3p | 8   | 110075188 | 110075208 | +      | edit     | 1        | 0        | 0.0%  | 0         | 0.0%  | 0         | 0.0%  |
| mmu-mir-140-3p | 8   | 110075188 | 110075208 | +      | edit     | 2        | 0        | 0.0%  | 0         | 0.0%  | 0         | 0.0%  |
| mmu-mir-140-3p | 8   | 110075188 | 110075208 | +      | edit     | 3        | 0        | 0.0%  | 0         | 0.0%  | 0         | 0.0%  |
| mmu-mir-140-3p | 8   | 110075188 | 110075208 | +      | edit     | 4        | 31       | 0.0%  | 10        | 0.0%  | 15        | 0.1%  |
| mmu-mir-140-3p | 8   | 110075188 | 110075208 | +      | edit     | 5        | 3        | 0.0%  | 6         | 0.0%  | 0         | 0.0%  |
| mmu-mir-140-3p | 8   | 110075188 | 110075208 | +      | edit     | 6        | 12       | 0.0%  | 15        | 0.0%  | 8         | 0.0%  |
| mmu-mir-140-3p | 8   | 110075188 | 110075208 | +      | edit     | 7        | 16       | 0.0%  | 15        | 0.0%  | 11        | 0.0%  |
| mmu-mir-140-3p | 8   | 110075188 | 110075208 | +      | edit     | 8        | 40       | 0.0%  | 10        | 0.0%  | 0         | 0.0%  |
| mmu-mir-140-3p | 8   | 110075188 | 110075208 | +      | edit     | 9        | 19       | 0.0%  | 3         | 0.0%  | 5         | 0.0%  |
| mmu-mir-140-3p | 8   | 110075188 | 110075208 | +      | edit     | 10       | 0        | 0.0%  | 0         | 0.0%  | 0         | 0.0%  |
| mmu-mir-140-3p | 8   | 110075188 | 110075208 | +      | edit     | 11       | 6        | 0.0%  | 0         | 0.0%  | 0         | 0.0%  |
| mmu-mir-140-3p | 8   | 110075188 | 110075208 | +      | edit     | 12       | 0        | 0.0%  | 0         | 0.0%  | 0         | 0.0%  |
| mmu-mir-140-3p | 8   | 110075188 | 110075208 | +      | edit     | 13       | 0        | 0.0%  | 0         | 0.0%  | 0         | 0.0%  |
| mmu-mir-140-3p | 8   | 110075188 | 110075208 | +      | edit     | 14       | 0        | 0.0%  | 0         | 0.0%  | 0         | 0.0%  |
| mmu-mir-140-3p | 8   | 110075188 | 110075208 | +      | edit     | 15       | 22       | 0.0%  | 124       | 0.3%  | 7         | 0.0%  |
| mmu-mir-140-3p | 8   | 110075188 | 110075208 | +      | edit     | 16       | 151      | 0.2%  | 89        | 0.2%  | 78        | 0.3%  |
| mmu-mir-140-3p | 8   | 110075188 | 110075208 | +      | edit     | 17       | 74       | 0.1%  | 46        | 0.1%  | 21        | 0.1%  |
| mmu-mir-140-3p | 8   | 110075188 | 110075208 | +      | edit     | 18       | 0        | 0.0%  | 0         | 0.0%  | 0         | 0.0%  |
| mmu-mir-140-3p | 8   | 110075188 | 110075208 | +      | edit     | 19       | 428      | 0.5%  | 201       | 0.4%  | 243       | 1.0%  |
| mmu-mir-140-3p | 8   | 110075188 | 110075208 | +      | edit     | 20       | 67       | 0.1%  | 40        | 0.1%  | 13        | 0.1%  |
| mmu-mir-140-3p | 8   | 110075188 | 110075208 | +      | edit     | 21       | 22       | 0.0%  | 3         | 0.0%  | 5         | 0.0%  |
| mmu-mir-140-3p | 8   | 110075188 | 110075208 | +      | edit     | 22       | 0        | 0.0%  | 0         | 0.0%  | 0         | 0.0%  |
| EDITED         |     |           |           |        |          |          | 990      | 1.2%  | 562       | 1.2%  | 477       | 2.0%  |
| CANONICAL      |     |           |           |        |          |          | 83969    | 98.8% | 45691     | 98.8% | 23075     | 98.0% |
| TOTAL          |     |           |           |        |          |          | 84959    |       | 46253     |       | 23552     |       |

| miRNA          | Chr | Start    | Stop     | Strand | Type     | Position | P7 reads | P7%   | P10 reads | P10%  | P14 reads | P14%  |
|----------------|-----|----------|----------|--------|----------|----------|----------|-------|-----------|-------|-----------|-------|
| mmu-mir-143-5p | 18  | 61808853 | 61808873 | -      | 5' Edit  | 5'       | 4        | 0.0%  | 0         | 0.0%  | 4         | 0.1%  |
| mmu-mir-143-5p | 18  | 61808853 | 61808873 | -      | 5' Indel | 5'       | 8        | 0.1%  | 0         | 0.0%  | 0         | 0.0%  |
| mmu-mir-143-5p | 18  | 61808853 | 61808873 | -      | edit     | 1        | 0        | 0.0%  | 0         | 0.0%  | 0         | 0.0%  |
| mmu-mir-143-5p | 18  | 61808853 | 61808873 | -      | edit     | 2        | 0        | 0.0%  | 0         | 0.0%  | 0         | 0.0%  |
| mmu-mir-143-5p | 18  | 61808853 | 61808873 | -      | edit     | 3        | 0        | 0.0%  | 0         | 0.0%  | 0         | 0.0%  |
| mmu-mir-143-5p | 18  | 61808853 | 61808873 | -      | edit     | 4        | 0        | 0.0%  | 0         | 0.0%  | 0         | 0.0%  |
| mmu-mir-143-5p | 18  | 61808853 | 61808873 | -      | edit     | 5        | 0        | 0.0%  | 0         | 0.0%  | 0         | 0.0%  |
| mmu-mir-143-5p | 18  | 61808853 | 61808873 | -      | edit     | 6        | 0        | 0.0%  | 0         | 0.0%  | 0         | 0.0%  |
| mmu-mir-143-5p | 18  | 61808853 | 61808873 | -      | edit     | 7        | 0        | 0.0%  | 0         | 0.0%  | 0         | 0.0%  |
| mmu-mir-143-5p | 18  | 61808853 | 61808873 | -      | edit     | 8        | 0        | 0.0%  | 0         | 0.0%  | 0         | 0.0%  |
| mmu-mir-143-5p | 18  | 61808853 | 61808873 | -      | edit     | 9        | 0        | 0.0%  | 0         | 0.0%  | 0         | 0.0%  |
| mmu-mir-143-5p | 18  | 61808853 | 61808873 | -      | edit     | 10       | 0        | 0.0%  | 0         | 0.0%  | 0         | 0.0%  |
| mmu-mir-143-5p | 18  | 61808853 | 61808873 | -      | edit     | 11       | 0        | 0.0%  | 0         | 0.0%  | 0         | 0.0%  |
| mmu-mir-143-5p | 18  | 61808853 | 61808873 | -      | edit     | 12       | 0        | 0.0%  | 0         | 0.0%  | 0         | 0.0%  |
| mmu-mir-143-5p | 18  | 61808853 | 61808873 | -      | edit     | 13       | 0        | 0.0%  | 0         | 0.0%  | 0         | 0.0%  |
| mmu-mir-143-5p | 18  | 61808853 | 61808873 | -      | edit     | 14       | 0        | 0.0%  | 0         | 0.0%  | 0         | 0.0%  |
| mmu-mir-143-5p | 18  | 61808853 | 61808873 | -      | edit     | 15       | 6        | 0.1%  | 0         | 0.0%  | 7         | 0.1%  |
| mmu-mir-143-5p | 18  | 61808853 | 61808873 | -      | edit     | 16       | 13       | 0.1%  | 11        | 0.1%  | 6         | 0.1%  |
| mmu-mir-143-5p | 18  | 61808853 | 61808873 | -      | edit     | 17       | 0        | 0.0%  | 0         | 0.0%  | 0         | 0.0%  |
| mmu-mir-143-5p | 18  | 61808853 | 61808873 | -      | edit     | 18       | 0        | 0.0%  | 0         | 0.0%  | 0         | 0.0%  |
| mmu-mir-143-5p | 18  | 61808853 | 61808873 | -      | edit     | 19       | 14       | 0.1%  | 10        | 0.1%  | 15        | 0.2%  |
| mmu-mir-143-5p | 18  | 61808853 | 61808873 | -      | edit     | 20       | 0        | 0.0%  | 0         | 0.0%  | 4         | 0.1%  |
| mmu-mir-143-5p | 18  | 61808853 | 61808873 | -      | edit     | 21       | 0        | 0.0%  | 0         | 0.0%  | 0         | 0.0%  |
| mmu-mir-143-5p | 18  | 61808853 | 61808873 | -      | edit     | 22       | 0        | 0.0%  | 0         | 0.0%  | 0         | 0.0%  |
| EDITED         |     |          |          |        |          |          | 44       | 0.4%  | 20        | 0.2%  | 35        | 0.6%  |
| CANONICAL      |     |          |          |        |          |          | 10776    | 99.6% | 9027      | 99.8% | 6303      | 99.4% |
| TOTAL          |     |          |          |        |          |          | 10820    |       | 9047      |       | 6338      |       |

| miRNA          | Chr | Start    | Stop     | Strand | Type | Position | P7 reads | P7%    | P10 reads | P10%  | P14 reads | P14%   |
|----------------|-----|----------|----------|--------|------|----------|----------|--------|-----------|-------|-----------|--------|
| mmu-mir-145-5p | 18  | 61807520 | 61807542 | -      | edit | 1        | 0        | 0.0%   | 0         | 0.0%  | 0         | 0.0%   |
| mmu-mir-145-5p | 18  | 61807520 | 61807542 | -      | edit | 2        | 0        | 0.0%   | 0         | 0.0%  | 0         | 0.0%   |
| mmu-mir-145-5p | 18  | 61807520 | 61807542 | -      | edit | 3        | 0        | 0.0%   | 0         | 0.0%  | 0         | 0.0%   |
| mmu-mir-145-5p | 18  | 61807520 | 61807542 | -      | edit | 4        | 0        | 0.0%   | 0         | 0.0%  | 0         | 0.0%   |
| mmu-mir-145-5p | 18  | 61807520 | 61807542 | -      | edit | 5        | 0        | 0.0%   | 0         | 0.0%  | 0         | 0.0%   |
| mmu-mir-145-5p | 18  | 61807520 | 61807542 | -      | edit | 6        | 0        | 0.0%   | 0         | 0.0%  | 0         | 0.0%   |
| mmu-mir-145-5p | 18  | 61807520 | 61807542 | -      | edit | 7        | 0        | 0.0%   | 0         | 0.0%  | 0         | 0.0%   |
| mmu-mir-145-5p | 18  | 61807520 | 61807542 | -      | edit | 8        | 0        | 0.0%   | 0         | 0.0%  | 0         | 0.0%   |
| mmu-mir-145-5p | 18  | 61807520 | 61807542 | -      | edit | 9        | 0        | 0.0%   | 0         | 0.0%  | 0         | 0.0%   |
| mmu-mir-145-5p | 18  | 61807520 | 61807542 | -      | edit | 10       | 0        | 0.0%   | 0         | 0.0%  | 0         | 0.0%   |
| mmu-mir-145-5p | 18  | 61807520 | 61807542 | -      | edit | 11       | 0        | 0.0%   | 0         | 0.0%  | 0         | 0.0%   |
| mmu-mir-145-5p | 18  | 61807520 | 61807542 | -      | edit | 12       | 0        | 0.0%   | 0         | 0.0%  | 0         | 0.0%   |
| mmu-mir-145-5p | 18  | 61807520 | 61807542 | -      | edit | 13       | 0        | 0.0%   | 0         | 0.0%  | 0         | 0.0%   |
| mmu-mir-145-5p | 18  | 61807520 | 61807542 | -      | edit | 14       | 0        | 0.0%   | 0         | 0.0%  | 0         | 0.0%   |
| mmu-mir-145-5p | 18  | 61807520 | 61807542 | -      | edit | 15       | 0        | 0.0%   | 0         | 0.0%  | 0         | 0.0%   |
| mmu-mir-145-5p | 18  | 61807520 | 61807542 | -      | edit | 16       | 0        | 0.0%   | 0         | 0.0%  | 0         | 0.0%   |
| mmu-mir-145-5p | 18  | 61807520 | 61807542 | -      | edit | 17       | 0        | 0.0%   | 8         | 1.1%  | 0         | 0.0%   |
| mmu-mir-145-5p | 18  | 61807520 | 61807542 | -      | edit | 18       | 0        | 0.0%   | 0         | 0.0%  | 0         | 0.0%   |
| mmu-mir-145-5p | 18  | 61807520 | 61807542 | -      | edit | 19       | 0        | 0.0%   | 0         | 0.0%  | 0         | 0.0%   |
| mmu-mir-145-5p | 18  | 61807520 | 61807542 | -      | edit | 20       | 0        | 0.0%   | 0         | 0.0%  | 0         | 0.0%   |
| mmu-mir-145-5p | 18  | 61807520 | 61807542 | -      | edit | 21       | 0        | 0.0%   | 3         | 0.4%  | 0         | 0.0%   |
| mmu-mir-145-5p | 18  | 61807520 | 61807542 | -      | edit | 22       | 0        | 0.0%   | 0         | 0.0%  | 0         | 0.0%   |
| EDITED         |     |          |          |        |      |          | 0        | 0.0%   | 11        | 1.5%  | 0         | 0.0%   |
| CANONICAL      |     |          |          |        |      |          | 949      | 100.0% | 682       | 98.5% | 769       | 100.0% |
| TOTAL          |     |          |          |        |      |          | 949      |        | 693       |       | 769       |        |



| miRNA           | Chr | Start    | Stop     | Strand | Type | Position | P7 reads | P7%   | P10 reads | P10%   | P14 reads | P14%   |
|-----------------|-----|----------|----------|--------|------|----------|----------|-------|-----------|--------|-----------|--------|
| mmu-mir-146b-5p | 19  | 46417280 | 46417301 | +      | edit | 1        | 0        | 0.0%  | 0         | 0.0%   | 0         | 0.0%   |
| mmu-mir-146b-5p | 19  | 46417280 | 46417301 | +      | edit | 2        | 0        | 0.0%  | 0         | 0.0%   | 0         | 0.0%   |
| mmu-mir-146b-5p | 19  | 46417280 | 46417301 | +      | edit | 3        | 0        | 0.0%  | 0         | 0.0%   | 0         | 0.0%   |
| mmu-mir-146b-5p | 19  | 46417280 | 46417301 | +      | edit | 4        | 0        | 0.0%  | 0         | 0.0%   | 0         | 0.0%   |
| mmu-mir-146b-5p | 19  | 46417280 | 46417301 | +      | edit | 5        | 0        | 0.0%  | 0         | 0.0%   | 0         | 0.0%   |
| mmu-mir-146b-5p | 19  | 46417280 | 46417301 | +      | edit | 6        | 0        | 0.0%  | 0         | 0.0%   | 0         | 0.0%   |
| mmu-mir-146b-5p | 19  | 46417280 | 46417301 | +      | edit | 7        | 0        | 0.0%  | 0         | 0.0%   | 0         | 0.0%   |
| mmu-mir-146b-5p | 19  | 46417280 | 46417301 | +      | edit | 8        | 0        | 0.0%  | 0         | 0.0%   | 0         | 0.0%   |
| mmu-mir-146b-5p | 19  | 46417280 | 46417301 | +      | edit | 9        | 0        | 0.0%  | 0         | 0.0%   | 0         | 0.0%   |
| mmu-mir-146b-5p | 19  | 46417280 | 46417301 | +      | edit | 10       | 0        | 0.0%  | 0         | 0.0%   | 0         | 0.0%   |
| mmu-mir-146b-5p | 19  | 46417280 | 46417301 | +      | edit | 11       | 0        | 0.0%  | 0         | 0.0%   | 0         | 0.0%   |
| mmu-mir-146b-5p | 19  | 46417280 | 46417301 | +      | edit | 12       | 0        | 0.0%  | 0         | 0.0%   | 0         | 0.0%   |
| mmu-mir-146b-5p | 19  | 46417280 | 46417301 | +      | edit | 13       | 0        | 0.0%  | 0         | 0.0%   | 0         | 0.0%   |
| mmu-mir-146b-5p | 19  | 46417280 | 46417301 | +      | edit | 14       | 0        | 0.0%  | 0         | 0.0%   | 0         | 0.0%   |
| mmu-mir-146b-5p | 19  | 46417280 | 46417301 | +      | edit | 15       | 0        | 0.0%  | 0         | 0.0%   | 0         | 0.0%   |
| mmu-mir-146b-5p | 19  | 46417280 | 46417301 | +      | edit | 16       | 0        | 0.0%  | 0         | 0.0%   | 0         | 0.0%   |
| mmu-mir-146b-5p | 19  | 46417280 | 46417301 | +      | edit | 17       | 0        | 0.0%  | 0         | 0.0%   | 0         | 0.0%   |
| mmu-mir-146b-5p | 19  | 46417280 | 46417301 | +      | edit | 18       | 0        | 0.0%  | 0         | 0.0%   | 0         | 0.0%   |
| mmu-mir-146b-5p | 19  | 46417280 | 46417301 | +      | edit | 19       | 0        | 0.0%  | 0         | 0.0%   | 0         | 0.0%   |
| mmu-mir-146b-5p | 19  | 46417280 | 46417301 | +      | edit | 20       | 0        | 0.0%  | 0         | 0.0%   | 0         | 0.0%   |
| mmu-mir-146b-5p | 19  | 46417280 | 46417301 | +      | edit | 21       | 3        | 1.1%  | 0         | 0.0%   | 0         | 0.0%   |
| mmu-mir-146b-5p | 19  | 46417280 | 46417301 | +      | edit | 22       | 0        | 0.0%  | 0         | 0.0%   | 0         | 0.0%   |
| EDITED          |     |          |          |        |      |          | 3        | 1.1%  | 0         | 0.0%   | 0         | 0.0%   |
| CANONICAL       |     |          |          |        |      |          | 288      | 98.9% | 228       | 100.0% | 297       | 100.0% |
| TOTAL           |     |          |          |        |      |          | 291      |       | 228       |        | 297       |        |

| miRNA           | Chr | Start    | Stop     | Strand | Type | Position | P7 reads | P7%   | P10 reads | P10%  | P14 reads | P14%   |
|-----------------|-----|----------|----------|--------|------|----------|----------|-------|-----------|-------|-----------|--------|
| mmu-mir-148a-3p | 6   | 51219828 | 51219849 | -      | edit | 1        | 0        | 0.0%  | 0         | 0.0%  | 0         | 0.0%   |
| mmu-mir-148a-3p | 6   | 51219828 | 51219849 | -      | edit | 2        | 0        | 0.0%  | 0         | 0.0%  | 0         | 0.0%   |
| mmu-mir-148a-3p | 6   | 51219828 | 51219849 | -      | edit | 3        | 0        | 0.0%  | 0         | 0.0%  | 0         | 0.0%   |
| mmu-mir-148a-3p | 6   | 51219828 | 51219849 | -      | edit | 4        | 0        | 0.0%  | 0         | 0.0%  | 0         | 0.0%   |
| mmu-mir-148a-3p | 6   | 51219828 | 51219849 | -      | edit | 5        | 0        | 0.0%  | 0         | 0.0%  | 0         | 0.0%   |
| mmu-mir-148a-3p | 6   | 51219828 | 51219849 | -      | edit | 6        | 0        | 0.0%  | 0         | 0.0%  | 0         | 0.0%   |
| mmu-mir-148a-3p | 6   | 51219828 | 51219849 | -      | edit | 7        | 0        | 0.0%  | 0         | 0.0%  | 0         | 0.0%   |
| mmu-mir-148a-3p | 6   | 51219828 | 51219849 | -      | edit | 8        | 5        | 0.3%  | 0         | 0.0%  | 0         | 0.0%   |
| mmu-mir-148a-3p | 6   | 51219828 | 51219849 | -      | edit | 9        | 0        | 0.0%  | 0         | 0.0%  | 0         | 0.0%   |
| mmu-mir-148a-3p | 6   | 51219828 | 51219849 | -      | edit | 10       | 0        | 0.0%  | 0         | 0.0%  | 0         | 0.0%   |
| mmu-mir-148a-3p | 6   | 51219828 | 51219849 | -      | edit | 11       | 0        | 0.0%  | 0         | 0.0%  | 0         | 0.0%   |
| mmu-mir-148a-3p | 6   | 51219828 | 51219849 | -      | edit | 12       | 0        | 0.0%  | 0         | 0.0%  | 0         | 0.0%   |
| mmu-mir-148a-3p | 6   | 51219828 | 51219849 | -      | edit | 13       | 0        | 0.0%  | 0         | 0.0%  | 0         | 0.0%   |
| mmu-mir-148a-3p | 6   | 51219828 | 51219849 | -      | edit | 14       | 0        | 0.0%  | 0         | 0.0%  | 0         | 0.0%   |
| mmu-mir-148a-3p | 6   | 51219828 | 51219849 | -      | edit | 15       | 0        | 0.0%  | 19        | 1.5%  | 0         | 0.0%   |
| mmu-mir-148a-3p | 6   | 51219828 | 51219849 | -      | edit | 16       | 0        | 0.0%  | 0         | 0.0%  | 0         | 0.0%   |
| mmu-mir-148a-3p | 6   | 51219828 | 51219849 | -      | edit | 17       | 0        | 0.0%  | 0         | 0.0%  | 0         | 0.0%   |
| mmu-mir-148a-3p | 6   | 51219828 | 51219849 | -      | edit | 18       | 0        | 0.0%  | 0         | 0.0%  | 0         | 0.0%   |
| mmu-mir-148a-3p | 6   | 51219828 | 51219849 | -      | edit | 19       | 0        | 0.0%  | 3         | 0.2%  | 0         | 0.0%   |
| mmu-mir-148a-3p | 6   | 51219828 | 51219849 | -      | edit | 20       | 0        | 0.0%  | 0         | 0.0%  | 0         | 0.0%   |
| mmu-mir-148a-3p | 6   | 51219828 | 51219849 | -      | edit | 21       | 0        | 0.0%  | 0         | 0.0%  | 0         | 0.0%   |
| mmu-mir-148a-3p | 6   | 51219828 | 51219849 | -      | edit | 22       | 0        | 0.0%  | 0         | 0.0%  | 0         | 0.0%   |
| EDITED          |     |          |          |        |      |          | 5        | 0.3%  | 22        | 1.7%  | 0         | 0.0%   |
| CANONICAL       |     |          |          |        |      |          | 1776     | 99.7% | 1232      | 98.3% | 732       | 100.0% |
| TOTAL           |     |          |          |        |      |          | 1781     |       | 1254      |       | 732       |        |

| miRNA          | Chr | Start    | Stop     | Strand | Type | Position | P7 reads | P7%   | P10 reads | P10%  | P14 reads | P14%  |
|----------------|-----|----------|----------|--------|------|----------|----------|-------|-----------|-------|-----------|-------|
| mmu-mir-151-3p | 15  | 73085250 | 73085270 | -      | edit | 1        | 0        | 0.0%  | 0         | 0.0%  | 0         | 0.0%  |
| mmu-mir-151-3p | 15  | 73085250 | 73085270 | -      | edit | 2        | 0        | 0.0%  | 0         | 0.0%  | 0         | 0.0%  |
| mmu-mir-151-3p | 15  | 73085250 | 73085270 | -      | edit | 3        | 0        | 0.0%  | 0         | 0.0%  | 0         | 0.0%  |
| mmu-mir-151-3p | 15  | 73085250 | 73085270 | -      | edit | 4        | 0        | 0.0%  | 0         | 0.0%  | 0         | 0.0%  |
| mmu-mir-151-3p | 15  | 73085250 | 73085270 | -      | edit | 5        | 0        | 0.0%  | 0         | 0.0%  | 0         | 0.0%  |
| mmu-mir-151-3p | 15  | 73085250 | 73085270 | -      | edit | 6        | 0        | 0.0%  | 0         | 0.0%  | 0         | 0.0%  |
| mmu-mir-151-3p | 15  | 73085250 | 73085270 | -      | edit | 7        | 0        | 0.0%  | 0         | 0.0%  | 0         | 0.0%  |
| mmu-mir-151-3p | 15  | 73085250 | 73085270 | -      | edit | 8        | 0        | 0.0%  | 0         | 0.0%  | 0         | 0.0%  |
| mmu-mir-151-3p | 15  | 73085250 | 73085270 | -      | edit | 9        | 0        | 0.0%  | 0         | 0.0%  | 0         | 0.0%  |
| mmu-mir-151-3p | 15  | 73085250 | 73085270 | -      | edit | 10       | 0        | 0.0%  | 0         | 0.0%  | 0         | 0.0%  |
| mmu-mir-151-3p | 15  | 73085250 | 73085270 | -      | edit | 11       | 0        | 0.0%  | 0         | 0.0%  | 0         | 0.0%  |
| mmu-mir-151-3p | 15  | 73085250 | 73085270 | -      | edit | 12       | 0        | 0.0%  | 0         | 0.0%  | 0         | 0.0%  |
| mmu-mir-151-3p | 15  | 73085250 | 73085270 | -      | edit | 13       | 0        | 0.0%  | 0         | 0.0%  | 0         | 0.0%  |
| mmu-mir-151-3p | 15  | 73085250 | 73085270 | -      | edit | 14       | 0        | 0.0%  | 0         | 0.0%  | 0         | 0.0%  |
| mmu-mir-151-3p | 15  | 73085250 | 73085270 | -      | edit | 15       | 5        | 0.2%  | 5         | 0.5%  | 0         | 0.0%  |
| mmu-mir-151-3p | 15  | 73085250 | 73085270 | -      | edit | 16       | 0        | 0.0%  | 0         | 0.0%  | 0         | 0.0%  |
| mmu-mir-151-3p | 15  | 73085250 | 73085270 | -      | edit | 17       | 4        | 0.2%  | 0         | 0.0%  | 0         | 0.0%  |
| mmu-mir-151-3p | 15  | 73085250 | 73085270 | -      | edit | 18       | 0        | 0.0%  | 0         | 0.0%  | 0         | 0.0%  |
| mmu-mir-151-3p | 15  | 73085250 | 73085270 | -      | edit | 19       | 10       | 0.5%  | 11        | 1.1%  | 8         | 1.0%  |
| mmu-mir-151-3p | 15  | 73085250 | 73085270 | -      | edit | 20       | 0        | 0.0%  | 0         | 0.0%  | 0         | 0.0%  |
| mmu-mir-151-3p | 15  | 73085250 | 73085270 | -      | edit | 21       | 0        | 0.0%  | 0         | 0.0%  | 0         | 0.0%  |
| mmu-mir-151-3p | 15  | 73085250 | 73085270 | -      | edit | 22       | 0        | 0.0%  | 0         | 0.0%  | 0         | 0.0%  |
| EDITED         |     |          |          |        |      |          | 18       | 0.9%  | 16        | 1.6%  | 8         | 1.0%  |
| CANONICAL      |     |          |          |        |      |          | 2104     | 99.1% | 1005      | 98.4% | 832       | 99.0% |
| TOTAL          |     |          |          |        |      |          | 2122     |       | 1021      |       | 840       |       |

| miRNA          | Chr | Start    | Stop     | Strand | Type | Position | P7 reads | P7%   | P10 reads | P10%  | P14 reads | P14%   |
|----------------|-----|----------|----------|--------|------|----------|----------|-------|-----------|-------|-----------|--------|
| mmu-mir-152-5p | 11  | 96711753 | 96711773 | +      | edit | 1        | 0        | 0.0%  | 0         | 0.0%  | 0         | 0.0%   |
| mmu-mir-152-5p | 11  | 96711753 | 96711773 | +      | edit | 2        | 0        | 0.0%  | 0         | 0.0%  | 0         | 0.0%   |
| mmu-mir-152-5p | 11  | 96711753 | 96711773 | +      | edit | 3        | 0        | 0.0%  | 0         | 0.0%  | 0         | 0.0%   |
| mmu-mir-152-5p | 11  | 96711753 | 96711773 | +      | edit | 4        | 0        | 0.0%  | 0         | 0.0%  | 0         | 0.0%   |
| mmu-mir-152-5p | 11  | 96711753 | 96711773 | +      | edit | 5        | 0        | 0.0%  | 0         | 0.0%  | 0         | 0.0%   |
| mmu-mir-152-5p | 11  | 96711753 | 96711773 | +      | edit | 6        | 10       | 0.0%  | 3         | 0.0%  | 0         | 0.0%   |
| mmu-mir-152-5p | 11  | 96711753 | 96711773 | +      | edit | 7        | 0        | 0.0%  | 0         | 0.0%  | 0         | 0.0%   |
| mmu-mir-152-5p | 11  | 96711753 | 96711773 | +      | edit | 8        | 0        | 0.0%  | 0         | 0.0%  | 0         | 0.0%   |
| mmu-mir-152-5p | 11  | 96711753 | 96711773 | +      | edit | 9        | 0        | 0.0%  | 0         | 0.0%  | 0         | 0.0%   |
| mmu-mir-152-5p | 11  | 96711753 | 96711773 | +      | edit | 10       | 0        | 0.0%  | 0         | 0.0%  | 0         | 0.0%   |
| mmu-mir-152-5p | 11  | 96711753 | 96711773 | +      | edit | 11       | 0        | 0.0%  | 0         | 0.0%  | 0         | 0.0%   |
| mmu-mir-152-5p | 11  | 96711753 | 96711773 | +      | edit | 12       | 0        | 0.0%  | 0         | 0.0%  | 0         | 0.0%   |
| mmu-mir-152-5p | 11  | 96711753 | 96711773 | +      | edit | 13       | 0        | 0.0%  | 0         | 0.0%  | 0         | 0.0%   |
| mmu-mir-152-5p | 11  | 96711753 | 96711773 | +      | edit | 14       | 0        | 0.0%  | 0         | 0.0%  | 0         | 0.0%   |
| mmu-mir-152-5p | 11  | 96711753 | 96711773 | +      | edit | 15       | 3        | 0.0%  | 8         | 0.1%  | 0         | 0.0%   |
| mmu-mir-152-5p | 11  | 96711753 | 96711773 | +      | edit | 16       | 0        | 0.0%  | 0         | 0.0%  | 0         | 0.0%   |
| mmu-mir-152-5p | 11  | 96711753 | 96711773 | +      | edit | 17       | 0        | 0.0%  | 0         | 0.0%  | 0         | 0.0%   |
| mmu-mir-152-5p | 11  | 96711753 | 96711773 | +      | edit | 18       | 0        | 0.0%  | 0         | 0.0%  | 0         | 0.0%   |
| mmu-mir-152-5p | 11  | 96711753 | 96711773 | +      | edit | 19       | 7        | 0.0%  | 0         | 0.0%  | 0         | 0.0%   |
| mmu-mir-152-5p | 11  | 96711753 | 96711773 | +      | edit | 20       | 0        | 0.0%  | 0         | 0.0%  | 0         | 0.0%   |
| mmu-mir-152-5p | 11  | 96711753 | 96711773 | +      | edit | 21       | 0        | 0.0%  | 0         | 0.0%  | 0         | 0.0%   |
| mmu-mir-152-5p | 11  | 96711753 | 96711773 | +      | edit | 22       | 0        | 0.0%  | 0         | 0.0%  | 0         | 0.0%   |
| EDITED         |     |          |          |        |      |          | 20       | 0.1%  | 11        | 0.1%  | 0         | 0.0%   |
| CANONICAL      |     |          |          |        |      |          | 25462    | 99.9% | 14706     | 99.9% | 6897      | 100.0% |
| TOTAL          |     |          |          |        |      |          | 25482    |       | 14717     |       | 6897      |        |

| miRNA             | Chr | Start     | Stop      | Strand | Type    | Position | P7 reads   | P7%         | P10 reads  | P10%        | P14 reads  | P14%        |
|-------------------|-----|-----------|-----------|--------|---------|----------|------------|-------------|------------|-------------|------------|-------------|
| mmu-mir-181a-1-5p | 1   | 139863045 | 139863067 | +      | 3' Edit | 3'       | 11         | 0.1%        | 0          | 0.0%        | 3          | 0.1%        |
| mmu-mir-181a-1-5p | 1   | 139863045 | 139863067 | +      | Indel   | 20       | 5          | 0.0%        | 0          | 0.0%        | 0          | 0.0%        |
| mmu-mir-181a-1-5p | 1   | 139863045 | 139863067 | +      | Indel   | 21       | 37         | 0.4%        | 13         | 0.3%        | 13         | 0.6%        |
| mmu-mir-181a-1-5p | 1   | 139863045 | 139863067 | +      | Indel   | 22       | 26         | 0.3%        | 0          | 0.0%        | 12         | 0.5%        |
| mmu-mir-181a-1-5p | 1   | 139863045 | 139863067 | +      | Indel   | 23       | 7          | 0.1%        | 0          | 0.0%        | 0          | 0.0%        |
| mmu-mir-181a-1-5p | 1   | 139863045 | 139863067 | +      | edit    | 1        | 0          | 0.0%        | 0          | 0.0%        | 0          | 0.0%        |
| mmu-mir-181a-1-5p | 1   | 139863045 | 139863067 | +      | edit    | 2        | 0          | 0.0%        | 0          | 0.0%        | 0          | 0.0%        |
| mmu-mir-181a-1-5p | 1   | 139863045 | 139863067 | +      | edit    | 3        | 0          | 0.0%        | 0          | 0.0%        | 0          | 0.0%        |
| mmu-mir-181a-1-5p | 1   | 139863045 | 139863067 | +      | edit    | 4        | 0          | 0.0%        | 0          | 0.0%        | 0          | 0.0%        |
| mmu-mir-181a-1-5p | 1   | 139863045 | 139863067 | +      | edit    | 5        | 0          | 0.0%        | 0          | 0.0%        | 0          | 0.0%        |
| mmu-mir-181a-1-5p | 1   | 139863045 | 139863067 | +      | edit    | 6        | 0          | 0.0%        | 0          | 0.0%        | 0          | 0.0%        |
| mmu-mir-181a-1-5p | 1   | 139863045 | 139863067 | +      | edit    | 7        | 0          | 0.0%        | 0          | 0.0%        | 0          | 0.0%        |
| mmu-mir-181a-1-5p | 1   | 139863045 | 139863067 | +      | edit    | 8        | 6          | 0.1%        | 0          | 0.0%        | 0          | 0.0%        |
| mmu-mir-181a-1-5p | 1   | 139863045 | 139863067 | +      | edit    | 9        | 0          | 0.0%        | 0          | 0.0%        | 0          | 0.0%        |
| mmu-mir-181a-1-5p | 1   | 139863045 | 139863067 | +      | edit    | 10       | 3          | 0.0%        | 0          | 0.0%        | 3          | 0.1%        |
| mmu-mir-181a-1-5p | 1   | 139863045 | 139863067 | +      | edit    | 11       | 0          | 0.0%        | 0          | 0.0%        | 0          | 0.0%        |
| mmu-mir-181a-1-5p | 1   | 139863045 | 139863067 | +      | edit    | 12       | 6          | 0.1%        | 0          | 0.0%        | 0          | 0.0%        |
| mmu-mir-181a-1-5p | 1   | 139863045 | 139863067 | +      | edit    | 13       | 6          | 0.1%        | 0          | 0.0%        | 0          | 0.0%        |
| mmu-mir-181a-1-5p | 1   | 139863045 | 139863067 | +      | edit    | 14       | 0          | 0.0%        | 0          | 0.0%        | 0          | 0.0%        |
| mmu-mir-181a-1-5p | 1   | 139863045 | 139863067 | +      | edit    | 15       | 68         | 0.7%        | 12         | 0.3%        | 9          | 0.4%        |
| mmu-mir-181a-1-5p | 1   | 139863045 | 139863067 | +      | edit    | 16       | 0          | 0.0%        | 0          | 0.0%        | 0          | 0.0%        |
| mmu-mir-181a-1-5p | 1   | 139863045 | 139863067 | +      | edit    | 17       | 10         | 0.1%        | 0          | 0.0%        | 0          | 0.0%        |
| mmu-mir-181a-1-5p | 1   | 139863045 | 139863067 | +      | edit    | 18       | 0          | 0.0%        | 0          | 0.0%        | 0          | 0.0%        |
| mmu-mir-181a-1-5p | 1   | 139863045 | 139863067 | +      | edit    | 19       | <b>651</b> | <b>6.9%</b> | <b>211</b> | <b>5.3%</b> | <b>207</b> | <b>9.6%</b> |
| mmu-mir-181a-1-5p | 1   | 139863045 | 139863067 | +      | edit    | 20       | 0          | 0.0%        | 0          | 0.0%        | 0          | 0.0%        |
| mmu-mir-181a-1-5p | 1   | 139863045 | 139863067 | +      | edit    | 21       | 348        | 3.7%        | 369        | 9.3%        | 93         | 4.3%        |
| mmu-mir-181a-1-5p | 1   | 139863045 | 139863067 | +      | edit    | 22       | 11         | 0.1%        | 0          | 0.0%        | 0          | 0.0%        |
| mmu-mir-181a-1-5p | 1   | 139863045 | 139863067 | +      | edit    | 23       | 43         | 0.4%        | 8          | 0.2%        | 16         | 0.7%        |
| EDITED            |     |           |           |        |         |          | 1234       | 13.0%       | 614        | 15.4%       | 354        | 16.4%       |
| CANONICAL         |     |           |           |        |         |          | 8252       | 87.0%       | 3368       | 84.6%       | 1808       | 83.6%       |
| TOTAL             |     |           |           |        |         |          | 9486       |             | 3982       |             | 2162       |             |

| miRNA             | Chr | Start    | Stop     | Strand | Type    | Position | P7 reads   | P7%         | P10 reads  | P10%        | P14 reads  | P14%        |
|-------------------|-----|----------|----------|--------|---------|----------|------------|-------------|------------|-------------|------------|-------------|
| mmu-mir-181a-2-5p | 2   | 38708261 | 38708283 | +      | 3' Edit | 3'       | 4          | 0.0%        | 0          | 0.0%        | 0          | 0.0%        |
| mmu-mir-181a-2-5p | 2   | 38708261 | 38708283 | +      | Indel   | 20       | 4          | 0.0%        | 0          | 0.0%        | 0          | 0.0%        |
| mmu-mir-181a-2-5p | 2   | 38708261 | 38708283 | +      | Indel   | 21       | 39         | 0.4%        | 11         | 0.3%        | 11         | 0.5%        |
| mmu-mir-181a-2-5p | 2   | 38708261 | 38708283 | +      | Indel   | 22       | 12         | 0.1%        | 4          | 0.1%        | 6          | 0.3%        |
| mmu-mir-181a-2-5p | 2   | 38708261 | 38708283 | +      | Indel   | 23       | 4          | 0.0%        | 0          | 0.0%        | 0          | 0.0%        |
| mmu-mir-181a-2-5p | 2   | 38708261 | 38708283 | +      | edit    | 1        | 0          | 0.0%        | 0          | 0.0%        | 0          | 0.0%        |
| mmu-mir-181a-2-5p | 2   | 38708261 | 38708283 | +      | edit    | 2        | 0          | 0.0%        | 0          | 0.0%        | 0          | 0.0%        |
| mmu-mir-181a-2-5p | 2   | 38708261 | 38708283 | +      | edit    | 3        | 0          | 0.0%        | 0          | 0.0%        | 0          | 0.0%        |
| mmu-mir-181a-2-5p | 2   | 38708261 | 38708283 | +      | edit    | 4        | 0          | 0.0%        | 0          | 0.0%        | 0          | 0.0%        |
| mmu-mir-181a-2-5p | 2   | 38708261 | 38708283 | +      | edit    | 5        | 0          | 0.0%        | 0          | 0.0%        | 0          | 0.0%        |
| mmu-mir-181a-2-5p | 2   | 38708261 | 38708283 | +      | edit    | 6        | 0          | 0.0%        | 0          | 0.0%        | 0          | 0.0%        |
| mmu-mir-181a-2-5p | 2   | 38708261 | 38708283 | +      | edit    | 7        | 0          | 0.0%        | 0          | 0.0%        | 0          | 0.0%        |
| mmu-mir-181a-2-5p | 2   | 38708261 | 38708283 | +      | edit    | 8        | 6          | 0.1%        | 0          | 0.0%        | 0          | 0.0%        |
| mmu-mir-181a-2-5p | 2   | 38708261 | 38708283 | +      | edit    | 9        | 0          | 0.0%        | 0          | 0.0%        | 0          | 0.0%        |
| mmu-mir-181a-2-5p | 2   | 38708261 | 38708283 | +      | edit    | 10       | 3          | 0.0%        | 0          | 0.0%        | 3          | 0.1%        |
| mmu-mir-181a-2-5p | 2   | 38708261 | 38708283 | +      | edit    | 11       | 0          | 0.0%        | 0          | 0.0%        | 0          | 0.0%        |
| mmu-mir-181a-2-5p | 2   | 38708261 | 38708283 | +      | edit    | 12       | 6          | 0.1%        | 0          | 0.0%        | 0          | 0.0%        |
| mmu-mir-181a-2-5p | 2   | 38708261 | 38708283 | +      | edit    | 13       | 6          | 0.1%        | 0          | 0.0%        | 0          | 0.0%        |
| mmu-mir-181a-2-5p | 2   | 38708261 | 38708283 | +      | edit    | 14       | 0          | 0.0%        | 0          | 0.0%        | 0          | 0.0%        |
| mmu-mir-181a-2-5p | 2   | 38708261 | 38708283 | +      | edit    | 15       | 67         | 0.7%        | 12         | 0.3%        | 9          | 0.4%        |
| mmu-mir-181a-2-5p | 2   | 38708261 | 38708283 | +      | edit    | 16       | 0          | 0.0%        | 0          | 0.0%        | 0          | 0.0%        |
| mmu-mir-181a-2-5p | 2   | 38708261 | 38708283 | +      | edit    | 17       | 9          | 0.1%        | 0          | 0.0%        | 0          | 0.0%        |
| mmu-mir-181a-2-5p | 2   | 38708261 | 38708283 | +      | edit    | 18       | 0          | 0.0%        | 0          | 0.0%        | 0          | 0.0%        |
| mmu-mir-181a-2-5p | 2   | 38708261 | 38708283 | +      | edit    | 19       | <b>649</b> | <b>6.9%</b> | <b>213</b> | <b>5.3%</b> | <b>210</b> | <b>9.8%</b> |
| mmu-mir-181a-2-5p | 2   | 38708261 | 38708283 | +      | edit    | 20       | 0          | 0.0%        | 0          | 0.0%        | 0          | 0.0%        |
| mmu-mir-181a-2-5p | 2   | 38708261 | 38708283 | +      | edit    | 21       | 346        | 3.7%        | 372        | 9.3%        | 94         | 4.4%        |
| mmu-mir-181a-2-5p | 2   | 38708261 | 38708283 | +      | edit    | 22       | 11         | 0.1%        | 0          | 0.0%        | 0          | 0.0%        |
| mmu-mir-181a-2-5p | 2   | 38708261 | 38708283 | +      | edit    | 23       | 30         | 0.3%        | 11         | 0.3%        | 13         | 0.6%        |
| EDITED            |     |          |          |        |         |          | 1192       | 12.7%       | 623        | 15.6%       | 344        | 16.1%       |
| CANONICAL         |     |          |          |        |         |          | 8208       | 87.3%       | 3381       | 84.4%       | 1799       | 83.9%       |
| TOTAL             |     |          |          |        |         |          | 9400       |             | 4004       |             | 2143       |             |

| miRNA             | Chr | Start     | Stop      | Strand | Type    | Position | P7 reads   | P7%         | P10 reads  | P10%        | P14 reads | P14%        |
|-------------------|-----|-----------|-----------|--------|---------|----------|------------|-------------|------------|-------------|-----------|-------------|
| mmu-mir-181b-1-5p | 1   | 139863227 | 139863249 | +      | 3' Edit | 3'       | 5          | 0.1%        | 0          | 0.0%        | 0         | 0.0%        |
| mmu-mir-181b-1-5p | 1   | 139863227 | 139863249 | +      | edit    | 1        | 0          | 0.0%        | 0          | 0.0%        | 0         | 0.0%        |
| mmu-mir-181b-1-5p | 1   | 139863227 | 139863249 | +      | edit    | 2        | 0          | 0.0%        | 0          | 0.0%        | 0         | 0.0%        |
| mmu-mir-181b-1-5p | 1   | 139863227 | 139863249 | +      | edit    | 3        | 0          | 0.0%        | 0          | 0.0%        | 0         | 0.0%        |
| mmu-mir-181b-1-5p | 1   | 139863227 | 139863249 | +      | edit    | 4        | 0          | 0.0%        | 0          | 0.0%        | 0         | 0.0%        |
| mmu-mir-181b-1-5p | 1   | 139863227 | 139863249 | +      | edit    | 5        | 0          | 0.0%        | 0          | 0.0%        | 0         | 0.0%        |
| mmu-mir-181b-1-5p | 1   | 139863227 | 139863249 | +      | edit    | 6        | 0          | 0.0%        | 0          | 0.0%        | 0         | 0.0%        |
| mmu-mir-181b-1-5p | 1   | 139863227 | 139863249 | +      | edit    | 7        | 0          | 0.0%        | 0          | 0.0%        | 0         | 0.0%        |
| mmu-mir-181b-1-5p | 1   | 139863227 | 139863249 | +      | edit    | 8        | 3          | 0.1%        | 0          | 0.0%        | 0         | 0.0%        |
| mmu-mir-181b-1-5p | 1   | 139863227 | 139863249 | +      | edit    | 9        | 0          | 0.0%        | 0          | 0.0%        | 0         | 0.0%        |
| mmu-mir-181b-1-5p | 1   | 139863227 | 139863249 | +      | edit    | 10       | 0          | 0.0%        | 0          | 0.0%        | 0         | 0.0%        |
| mmu-mir-181b-1-5p | 1   | 139863227 | 139863249 | +      | edit    | 11       | 0          | 0.0%        | 0          | 0.0%        | 0         | 0.0%        |
| mmu-mir-181b-1-5p | 1   | 139863227 | 139863249 | +      | edit    | 12       | 14         | 0.3%        | 0          | 0.0%        | 0         | 0.0%        |
| mmu-mir-181b-1-5p | 1   | 139863227 | 139863249 | +      | edit    | 13       | 0          | 0.0%        | 0          | 0.0%        | 0         | 0.0%        |
| mmu-mir-181b-1-5p | 1   | 139863227 | 139863249 | +      | edit    | 14       | 0          | 0.0%        | 0          | 0.0%        | 0         | 0.0%        |
| mmu-mir-181b-1-5p | 1   | 139863227 | 139863249 | +      | edit    | 15       | 19         | 0.4%        | 4          | 0.2%        | 0         | 0.0%        |
| mmu-mir-181b-1-5p | 1   | 139863227 | 139863249 | +      | edit    | 16       | 0          | 0.0%        | 0          | 0.0%        | 0         | 0.0%        |
| mmu-mir-181b-1-5p | 1   | 139863227 | 139863249 | +      | edit    | 17       | 4          | 0.1%        | 0          | 0.0%        | 0         | 0.0%        |
| mmu-mir-181b-1-5p | 1   | 139863227 | 139863249 | +      | edit    | 18       | 0          | 0.0%        | 0          | 0.0%        | 0         | 0.0%        |
| mmu-mir-181b-1-5p | 1   | 139863227 | 139863249 | +      | edit    | 19       | <b>434</b> | <b>7.9%</b> | <b>125</b> | <b>6.7%</b> | <b>98</b> | <b>9.9%</b> |
| mmu-mir-181b-1-5p | 1   | 139863227 | 139863249 | +      | edit    | 20       | 0          | 0.0%        | 0          | 0.0%        | 0         | 0.0%        |
| mmu-mir-181b-1-5p | 1   | 139863227 | 139863249 | +      | edit    | 21       | 0          | 0.0%        | 5          | 0.2%        | 0         | 0.0%        |
| mmu-mir-181b-1-5p | 1   | 139863227 | 139863249 | +      | edit    | 22       | 4          | 0.1%        | 0          | 0.0%        | 0         | 0.0%        |
| mmu-mir-181b-1-5p | 1   | 139863227 | 139863249 | +      | edit    | 23       | 4          | 0.1%        | 0          | 0.0%        | 5         | 0.5%        |
| EDITED            |     |           |           |        |         |          | 486        | 8.9%        | 133        | 7.2%        | 103       | 10.4%       |
| CANONICAL         |     |           |           |        |         |          | 5002       | 91.1%       | 1713       | 92.8%       | 883       | 89.6%       |
| TOTAL             |     |           |           |        |         |          | 5488       |             | 1846       |             | 986       |             |

| miRNA             | Chr | Start    | Stop     | Strand | Type     | Position | P7 reads   | P7%         | P10 reads  | P10%        | P14 reads  | P14%        |
|-------------------|-----|----------|----------|--------|----------|----------|------------|-------------|------------|-------------|------------|-------------|
| mmu-mir-181b-2-5p | 2   | 38709365 | 38709387 | +      | 3' Edit  | 3'       | 16         | 0.1%        | 0          | 0.0%        | 7          | 0.3%        |
| mmu-mir-181b-2-5p | 2   | 38709365 | 38709387 | +      | 3' Indel | 3'       | 60         | 0.5%        | 0          | 0.0%        | 12         | 0.6%        |
| mmu-mir-181b-2-5p | 2   | 38709365 | 38709387 | +      | Indel    | 16       | 29         | 0.2%        | 3          | 0.1%        | 9          | 0.4%        |
| mmu-mir-181b-2-5p | 2   | 38709365 | 38709387 | +      | Indel    | 17       | 0          | 0.0%        | 0          | 0.0%        | 0          | 0.0%        |
| mmu-mir-181b-2-5p | 2   | 38709365 | 38709387 | +      | Indel    | 18       | 4          | 0.0%        | 0          | 0.0%        | 0          | 0.0%        |
| mmu-mir-181b-2-5p | 2   | 38709365 | 38709387 | +      | Indel    | 19       | 218        | 1.9%        | 71         | 1.8%        | 74         | 3.5%        |
| mmu-mir-181b-2-5p | 2   | 38709365 | 38709387 | +      | Indel    | 20       | 4          | 0.0%        | 0          | 0.0%        | 0          | 0.0%        |
| mmu-mir-181b-2-5p | 2   | 38709365 | 38709387 | +      | Indel    | 21       | 6          | 0.1%        | 3          | 0.1%        | 0          | 0.0%        |
| mmu-mir-181b-2-5p | 2   | 38709365 | 38709387 | +      | Indel    | 22       | 87         | 0.7%        | 19         | 0.5%        | 11         | 0.5%        |
| mmu-mir-181b-2-5p | 2   | 38709365 | 38709387 | +      | Indel    | 23       | 25         | 0.2%        | 6          | 0.2%        | 5          | 0.2%        |
| mmu-mir-181b-2-5p | 2   | 38709365 | 38709387 | +      | edit     | 1        | 0          | 0.0%        | 0          | 0.0%        | 0          | 0.0%        |
| mmu-mir-181b-2-5p | 2   | 38709365 | 38709387 | +      | edit     | 2        | 0          | 0.0%        | 0          | 0.0%        | 0          | 0.0%        |
| mmu-mir-181b-2-5p | 2   | 38709365 | 38709387 | +      | edit     | 3        | 0          | 0.0%        | 0          | 0.0%        | 0          | 0.0%        |
| mmu-mir-181b-2-5p | 2   | 38709365 | 38709387 | +      | edit     | 4        | 0          | 0.0%        | 5          | 0.1%        | 0          | 0.0%        |
| mmu-mir-181b-2-5p | 2   | 38709365 | 38709387 | +      | edit     | 5        | 0          | 0.0%        | 0          | 0.0%        | 0          | 0.0%        |
| mmu-mir-181b-2-5p | 2   | 38709365 | 38709387 | +      | edit     | 6        | 4          | 0.0%        | 0          | 0.0%        | 0          | 0.0%        |
| mmu-mir-181b-2-5p | 2   | 38709365 | 38709387 | +      | edit     | 7        | 0          | 0.0%        | 0          | 0.0%        | 0          | 0.0%        |
| mmu-mir-181b-2-5p | 2   | 38709365 | 38709387 | +      | edit     | 8        | 6          | 0.1%        | 0          | 0.0%        | 0          | 0.0%        |
| mmu-mir-181b-2-5p | 2   | 38709365 | 38709387 | +      | edit     | 9        | 0          | 0.0%        | 0          | 0.0%        | 0          | 0.0%        |
| mmu-mir-181b-2-5p | 2   | 38709365 | 38709387 | +      | edit     | 10       | 7          | 0.1%        | 0          | 0.0%        | 4          | 0.2%        |
| mmu-mir-181b-2-5p | 2   | 38709365 | 38709387 | +      | edit     | 11       | 3          | 0.0%        | 0          | 0.0%        | 0          | 0.0%        |
| mmu-mir-181b-2-5p | 2   | 38709365 | 38709387 | +      | edit     | 12       | 110        | 0.9%        | 26         | 0.7%        | 21         | 1.0%        |
| mmu-mir-181b-2-5p | 2   | 38709365 | 38709387 | +      | edit     | 13       | 0          | 0.0%        | 0          | 0.0%        | 0          | 0.0%        |
| mmu-mir-181b-2-5p | 2   | 38709365 | 38709387 | +      | edit     | 14       | 13         | 0.1%        | 0          | 0.0%        | 0          | 0.0%        |
| mmu-mir-181b-2-5p | 2   | 38709365 | 38709387 | +      | edit     | 15       | 49         | 0.4%        | 11         | 0.3%        | 5          | 0.2%        |
| mmu-mir-181b-2-5p | 2   | 38709365 | 38709387 | +      | edit     | 16       | 0          | 0.0%        | 0          | 0.0%        | 0          | 0.0%        |
| mmu-mir-181b-2-5p | 2   | 38709365 | 38709387 | +      | edit     | 17       | 11         | 0.1%        | 4          | 0.1%        | 0          | 0.0%        |
| mmu-mir-181b-2-5p | 2   | 38709365 | 38709387 | +      | edit     | 18       | 0          | 0.0%        | 0          | 0.0%        | 0          | 0.0%        |
| mmu-mir-181b-2-5p | 2   | 38709365 | 38709387 | +      | edit     | 19       | <b>860</b> | <b>7.3%</b> | <b>275</b> | <b>6.9%</b> | <b>201</b> | <b>9.5%</b> |
| mmu-mir-181b-2-5p | 2   | 38709365 | 38709387 | +      | edit     | 20       | 0          | 0.0%        | 0          | 0.0%        | 0          | 0.0%        |
| mmu-mir-181b-2-5p | 2   | 38709365 | 38709387 | +      | edit     | 21       | 7          | 0.1%        | 12         | 0.3%        | 0          | 0.0%        |
| mmu-mir-181b-2-5p | 2   | 38709365 | 38709387 | +      | edit     | 22       | 24         | 0.2%        | 7          | 0.2%        | 3          | 0.1%        |
| mmu-mir-181b-2-5p | 2   | 38709365 | 38709387 | +      | edit     | 23       | 172        | 1.5%        | 68         | 1.7%        | 57         | 2.7%        |
| EDITED            |     |          |          |        |          |          | 1712       | 14.6%       | 508        | 12.8%       | 407        | 19.2%       |
| CANONICAL         |     |          |          |        |          |          | 10037      | 85.4%       | 3469       | 87.2%       | 1711       | 80.8%       |
| TOTAL             |     |          |          |        |          |          | 11749      |             | 3977       |             | 2118       |             |



| miRNA           | Chr | Start    | Stop     | Strand | Type | Position | P7 reads | P7%    | P10 reads | P10%  | P14 reads | P14%   |
|-----------------|-----|----------|----------|--------|------|----------|----------|--------|-----------|-------|-----------|--------|
| mmu-mir-181c-5p | 8   | 86702823 | 86702844 | -      | edit | 1        | 0        | 0.0%   | 0         | 0.0%  | 0         | 0.0%   |
| mmu-mir-181c-5p | 8   | 86702823 | 86702844 | -      | edit | 2        | 0        | 0.0%   | 0         | 0.0%  | 0         | 0.0%   |
| mmu-mir-181c-5p | 8   | 86702823 | 86702844 | -      | edit | 3        | 0        | 0.0%   | 0         | 0.0%  | 0         | 0.0%   |
| mmu-mir-181c-5p | 8   | 86702823 | 86702844 | -      | edit | 4        | 0        | 0.0%   | 0         | 0.0%  | 0         | 0.0%   |
| mmu-mir-181c-5p | 8   | 86702823 | 86702844 | -      | edit | 5        | 0        | 0.0%   | 0         | 0.0%  | 0         | 0.0%   |
| mmu-mir-181c-5p | 8   | 86702823 | 86702844 | -      | edit | 6        | 0        | 0.0%   | 0         | 0.0%  | 0         | 0.0%   |
| mmu-mir-181c-5p | 8   | 86702823 | 86702844 | -      | edit | 7        | 0        | 0.0%   | 0         | 0.0%  | 0         | 0.0%   |
| mmu-mir-181c-5p | 8   | 86702823 | 86702844 | -      | edit | 8        | 0        | 0.0%   | 0         | 0.0%  | 0         | 0.0%   |
| mmu-mir-181c-5p | 8   | 86702823 | 86702844 | -      | edit | 9        | 0        | 0.0%   | 0         | 0.0%  | 0         | 0.0%   |
| mmu-mir-181c-5p | 8   | 86702823 | 86702844 | -      | edit | 10       | 0        | 0.0%   | 0         | 0.0%  | 0         | 0.0%   |
| mmu-mir-181c-5p | 8   | 86702823 | 86702844 | -      | edit | 11       | 0        | 0.0%   | 0         | 0.0%  | 0         | 0.0%   |
| mmu-mir-181c-5p | 8   | 86702823 | 86702844 | -      | edit | 12       | 0        | 0.0%   | 0         | 0.0%  | 0         | 0.0%   |
| mmu-mir-181c-5p | 8   | 86702823 | 86702844 | -      | edit | 13       | 0        | 0.0%   | 0         | 0.0%  | 0         | 0.0%   |
| mmu-mir-181c-5p | 8   | 86702823 | 86702844 | -      | edit | 14       | 0        | 0.0%   | 0         | 0.0%  | 0         | 0.0%   |
| mmu-mir-181c-5p | 8   | 86702823 | 86702844 | -      | edit | 15       | 0        | 0.0%   | 0         | 0.0%  | 0         | 0.0%   |
| mmu-mir-181c-5p | 8   | 86702823 | 86702844 | -      | edit | 16       | 0        | 0.0%   | 0         | 0.0%  | 0         | 0.0%   |
| mmu-mir-181c-5p | 8   | 86702823 | 86702844 | -      | edit | 17       | 0        | 0.0%   | 0         | 0.0%  | 0         | 0.0%   |
| mmu-mir-181c-5p | 8   | 86702823 | 86702844 | -      | edit | 18       | 0        | 0.0%   | 0         | 0.0%  | 0         | 0.0%   |
| mmu-mir-181c-5p | 8   | 86702823 | 86702844 | -      | edit | 19       | 0        | 0.0%   | 0         | 0.0%  | 0         | 0.0%   |
| mmu-mir-181c-5p | 8   | 86702823 | 86702844 | -      | edit | 20       | 0        | 0.0%   | 4         | 1.3%  | 0         | 0.0%   |
| mmu-mir-181c-5p | 8   | 86702823 | 86702844 | -      | edit | 21       | 0        | 0.0%   | 0         | 0.0%  | 0         | 0.0%   |
| mmu-mir-181c-5p | 8   | 86702823 | 86702844 | -      | edit | 22       | 0        | 0.0%   | 0         | 0.0%  | 0         | 0.0%   |
| EDITED          |     |          |          |        |      |          | 0        | 0.0%   | 4         | 1.3%  | 0         | 0.0%   |
| CANONICAL       |     |          |          |        |      |          | 759      | 100.0% | 296       | 98.7% | 117       | 100.0% |
| TOTAL           |     |          |          |        |      |          | 759      |        | 300       |       | 117       |        |

| miRNA           | Chr | Start    | Stop     | Strand | Type     | Position | P7 reads | P7%   | P10 reads | P10%  | P14 reads | P14%  |
|-----------------|-----|----------|----------|--------|----------|----------|----------|-------|-----------|-------|-----------|-------|
| mmu-mir-181d-5p | 8   | 86702658 | 86702680 | -      | 5' Edit  | 5'       | 23       | 0.1%  | 0         | 0.0%  | 4         | 0.1%  |
| mmu-mir-181d-5p | 8   | 86702658 | 86702680 | -      | 5' Indel | 5'       | 0        | 0.0%  | 0         | 0.0%  | 3         | 0.1%  |
| mmu-mir-181d-5p | 8   | 86702658 | 86702680 | -      | Indel    | 21       | 3        | 0.0%  | 0         | 0.0%  | 0         | 0.0%  |
| mmu-mir-181d-5p | 8   | 86702658 | 86702680 | -      | Indel    | 22       | 0        | 0.0%  | 3         | 0.0%  | 0         | 0.0%  |
| mmu-mir-181d-5p | 8   | 86702658 | 86702680 | -      | Indel    | 23       | 127      | 0.5%  | 30        | 0.4%  | 37        | 0.8%  |
| mmu-mir-181d-5p | 8   | 86702658 | 86702680 | -      | edit     | 1        | 0        | 0.0%  | 0         | 0.0%  | 0         | 0.0%  |
| mmu-mir-181d-5p | 8   | 86702658 | 86702680 | -      | edit     | 2        | 0        | 0.0%  | 0         | 0.0%  | 0         | 0.0%  |
| mmu-mir-181d-5p | 8   | 86702658 | 86702680 | -      | edit     | 3        | 0        | 0.0%  | 0         | 0.0%  | 0         | 0.0%  |
| mmu-mir-181d-5p | 8   | 86702658 | 86702680 | -      | edit     | 4        | 11       | 0.0%  | 11        | 0.2%  | 3         | 0.1%  |
| mmu-mir-181d-5p | 8   | 86702658 | 86702680 | -      | edit     | 5        | 0        | 0.0%  | 0         | 0.0%  | 0         | 0.0%  |
| mmu-mir-181d-5p | 8   | 86702658 | 86702680 | -      | edit     | 6        | 3        | 0.0%  | 0         | 0.0%  | 0         | 0.0%  |
| mmu-mir-181d-5p | 8   | 86702658 | 86702680 | -      | edit     | 7        | 0        | 0.0%  | 0         | 0.0%  | 0         | 0.0%  |
| mmu-mir-181d-5p | 8   | 86702658 | 86702680 | -      | edit     | 8        | 21       | 0.1%  | 7         | 0.1%  | 0         | 0.0%  |
| mmu-mir-181d-5p | 8   | 86702658 | 86702680 | -      | edit     | 9        | 0        | 0.0%  | 0         | 0.0%  | 0         | 0.0%  |
| mmu-mir-181d-5p | 8   | 86702658 | 86702680 | -      | edit     | 10       | 6        | 0.0%  | 0         | 0.0%  | 0         | 0.0%  |
| mmu-mir-181d-5p | 8   | 86702658 | 86702680 | -      | edit     | 11       | 0        | 0.0%  | 0         | 0.0%  | 0         | 0.0%  |
| mmu-mir-181d-5p | 8   | 86702658 | 86702680 | -      | edit     | 12       | 0        | 0.0%  | 0         | 0.0%  | 0         | 0.0%  |
| mmu-mir-181d-5p | 8   | 86702658 | 86702680 | -      | edit     | 13       | 7        | 0.0%  | 0         | 0.0%  | 0         | 0.0%  |
| mmu-mir-181d-5p | 8   | 86702658 | 86702680 | -      | edit     | 14       | 0        | 0.0%  | 0         | 0.0%  | 0         | 0.0%  |
| mmu-mir-181d-5p | 8   | 86702658 | 86702680 | -      | edit     | 15       | 77       | 0.3%  | 18        | 0.3%  | 8         | 0.2%  |
| mmu-mir-181d-5p | 8   | 86702658 | 86702680 | -      | edit     | 16       | 28       | 0.1%  | 14        | 0.2%  | 8         | 0.2%  |
| mmu-mir-181d-5p | 8   | 86702658 | 86702680 | -      | edit     | 17       | 31       | 0.1%  | 16        | 0.2%  | 5         | 0.1%  |
| mmu-mir-181d-5p | 8   | 86702658 | 86702680 | -      | edit     | 18       | 18       | 0.1%  | 4         | 0.1%  | 0         | 0.0%  |
| mmu-mir-181d-5p | 8   | 86702658 | 86702680 | -      | edit     | 19       | 752      | 3.1%  | 131       | 1.9%  | 175       | 3.9%  |
| mmu-mir-181d-5p | 8   | 86702658 | 86702680 | -      | edit     | 20       | 11       | 0.0%  | 3         | 0.0%  | 0         | 0.0%  |
| mmu-mir-181d-5p | 8   | 86702658 | 86702680 | -      | edit     | 21       | 40       | 0.2%  | 23        | 0.3%  | 3         | 0.1%  |
| mmu-mir-181d-5p | 8   | 86702658 | 86702680 | -      | edit     | 22       | 6        | 0.0%  | 0         | 0.0%  | 4         | 0.1%  |
| mmu-mir-181d-5p | 8   | 86702658 | 86702680 | -      | edit     | 23       | 37       | 0.2%  | 8         | 0.1%  | 9         | 0.2%  |
| EDITED          |     |          |          |        |          |          | 1199     | 4.9%  | 267       | 3.9%  | 258       | 5.8%  |
| CANONICAL       |     |          |          |        |          |          | 23294    | 95.1% | 6626      | 96.1% | 4197      | 94.2% |
| TOTAL           |     |          |          |        |          |          | 24493    |       | 6893      |       | 4455      |       |

| miRNA          | Chr | Start    | Stop     | Strand | Type | Position | P7 reads | P7%   | P10 reads | P10%   | P14 reads | P14%   |
|----------------|-----|----------|----------|--------|------|----------|----------|-------|-----------|--------|-----------|--------|
| mmu-mir-182-5p | 6   | 30115962 | 30115986 | -      | edit | 1        | 0        | 0.0%  | 0         | 0.0%   | 0         | 0.0%   |
| mmu-mir-182-5p | 6   | 30115962 | 30115986 | -      | edit | 2        | 0        | 0.0%  | 0         | 0.0%   | 0         | 0.0%   |
| mmu-mir-182-5p | 6   | 30115962 | 30115986 | -      | edit | 3        | 0        | 0.0%  | 0         | 0.0%   | 0         | 0.0%   |
| mmu-mir-182-5p | 6   | 30115962 | 30115986 | -      | edit | 4        | 0        | 0.0%  | 0         | 0.0%   | 0         | 0.0%   |
| mmu-mir-182-5p | 6   | 30115962 | 30115986 | -      | edit | 5        | 0        | 0.0%  | 0         | 0.0%   | 0         | 0.0%   |
| mmu-mir-182-5p | 6   | 30115962 | 30115986 | -      | edit | 6        | 0        | 0.0%  | 0         | 0.0%   | 0         | 0.0%   |
| mmu-mir-182-5p | 6   | 30115962 | 30115986 | -      | edit | 7        | 0        | 0.0%  | 0         | 0.0%   | 0         | 0.0%   |
| mmu-mir-182-5p | 6   | 30115962 | 30115986 | -      | edit | 8        | 0        | 0.0%  | 0         | 0.0%   | 0         | 0.0%   |
| mmu-mir-182-5p | 6   | 30115962 | 30115986 | -      | edit | 9        | 0        | 0.0%  | 0         | 0.0%   | 0         | 0.0%   |
| mmu-mir-182-5p | 6   | 30115962 | 30115986 | -      | edit | 10       | 0        | 0.0%  | 0         | 0.0%   | 0         | 0.0%   |
| mmu-mir-182-5p | 6   | 30115962 | 30115986 | -      | edit | 11       | 0        | 0.0%  | 0         | 0.0%   | 0         | 0.0%   |
| mmu-mir-182-5p | 6   | 30115962 | 30115986 | -      | edit | 12       | 0        | 0.0%  | 0         | 0.0%   | 0         | 0.0%   |
| mmu-mir-182-5p | 6   | 30115962 | 30115986 | -      | edit | 13       | 0        | 0.0%  | 0         | 0.0%   | 0         | 0.0%   |
| mmu-mir-182-5p | 6   | 30115962 | 30115986 | -      | edit | 14       | 0        | 0.0%  | 0         | 0.0%   | 0         | 0.0%   |
| mmu-mir-182-5p | 6   | 30115962 | 30115986 | -      | edit | 15       | 0        | 0.0%  | 0         | 0.0%   | 0         | 0.0%   |
| mmu-mir-182-5p | 6   | 30115962 | 30115986 | -      | edit | 16       | 0        | 0.0%  | 0         | 0.0%   | 0         | 0.0%   |
| mmu-mir-182-5p | 6   | 30115962 | 30115986 | -      | edit | 17       | 0        | 0.0%  | 0         | 0.0%   | 0         | 0.0%   |
| mmu-mir-182-5p | 6   | 30115962 | 30115986 | -      | edit | 18       | 0        | 0.0%  | 0         | 0.0%   | 0         | 0.0%   |
| mmu-mir-182-5p | 6   | 30115962 | 30115986 | -      | edit | 19       | 0        | 0.0%  | 0         | 0.0%   | 0         | 0.0%   |
| mmu-mir-182-5p | 6   | 30115962 | 30115986 | -      | edit | 20       | 0        | 0.0%  | 0         | 0.0%   | 0         | 0.0%   |
| mmu-mir-182-5p | 6   | 30115962 | 30115986 | -      | edit | 21       | 0        | 0.0%  | 0         | 0.0%   | 0         | 0.0%   |
| mmu-mir-182-5p | 6   | 30115962 | 30115986 | -      | edit | 22       | 0        | 0.0%  | 0         | 0.0%   | 0         | 0.0%   |
| mmu-mir-182-5p | 6   | 30115962 | 30115986 | -      | edit | 23       | 3        | 2.1%  | 0         | 0.0%   | 0         | 0.0%   |
| EDITED         |     |          |          |        |      |          | 3        | 2.1%  | 0         | 0.0%   | 0         | 0.0%   |
| CANONICAL      |     |          |          |        |      |          | 139      | 97.9% | 56        | 100.0% | 27        | 100.0% |
| TOTAL          |     |          |          |        |      |          | 142      |       | 56        |        | 27        |        |

| miRNA          | Chr | Start    | Stop     | Strand | Type    | Position | P7 reads | P7%   | P10 reads | P10%  | P14 reads | P14%  |
|----------------|-----|----------|----------|--------|---------|----------|----------|-------|-----------|-------|-----------|-------|
| mmu-mir-185-5p | 16  | 18327531 | 18327552 | -      | 5' Edit | 5'       | 7        | 0.1%  | 0         | 0.0%  | 0         | 0.0%  |
| mmu-mir-185-5p | 16  | 18327531 | 18327552 | -      | edit    | 1        | 0        | 0.0%  | 0         | 0.0%  | 0         | 0.0%  |
| mmu-mir-185-5p | 16  | 18327531 | 18327552 | -      | edit    | 2        | 0        | 0.0%  | 0         | 0.0%  | 0         | 0.0%  |
| mmu-mir-185-5p | 16  | 18327531 | 18327552 | -      | edit    | 3        | 0        | 0.0%  | 0         | 0.0%  | 0         | 0.0%  |
| mmu-mir-185-5p | 16  | 18327531 | 18327552 | -      | edit    | 4        | 0        | 0.0%  | 0         | 0.0%  | 0         | 0.0%  |
| mmu-mir-185-5p | 16  | 18327531 | 18327552 | -      | edit    | 5        | 0        | 0.0%  | 0         | 0.0%  | 0         | 0.0%  |
| mmu-mir-185-5p | 16  | 18327531 | 18327552 | -      | edit    | 6        | 0        | 0.0%  | 0         | 0.0%  | 0         | 0.0%  |
| mmu-mir-185-5p | 16  | 18327531 | 18327552 | -      | edit    | 7        | 0        | 0.0%  | 0         | 0.0%  | 0         | 0.0%  |
| mmu-mir-185-5p | 16  | 18327531 | 18327552 | -      | edit    | 8        | 4        | 0.1%  | 0         | 0.0%  | 0         | 0.0%  |
| mmu-mir-185-5p | 16  | 18327531 | 18327552 | -      | edit    | 9        | 0        | 0.0%  | 0         | 0.0%  | 0         | 0.0%  |
| mmu-mir-185-5p | 16  | 18327531 | 18327552 | -      | edit    | 10       | 0        | 0.0%  | 0         | 0.0%  | 0         | 0.0%  |
| mmu-mir-185-5p | 16  | 18327531 | 18327552 | -      | edit    | 11       | 0        | 0.0%  | 0         | 0.0%  | 0         | 0.0%  |
| mmu-mir-185-5p | 16  | 18327531 | 18327552 | -      | edit    | 12       | 0        | 0.0%  | 0         | 0.0%  | 0         | 0.0%  |
| mmu-mir-185-5p | 16  | 18327531 | 18327552 | -      | edit    | 13       | 0        | 0.0%  | 0         | 0.0%  | 0         | 0.0%  |
| mmu-mir-185-5p | 16  | 18327531 | 18327552 | -      | edit    | 14       | 0        | 0.0%  | 0         | 0.0%  | 0         | 0.0%  |
| mmu-mir-185-5p | 16  | 18327531 | 18327552 | -      | edit    | 15       | 0        | 0.0%  | 0         | 0.0%  | 0         | 0.0%  |
| mmu-mir-185-5p | 16  | 18327531 | 18327552 | -      | edit    | 16       | 28       | 0.4%  | 17        | 0.3%  | 12        | 0.5%  |
| mmu-mir-185-5p | 16  | 18327531 | 18327552 | -      | edit    | 17       | 16       | 0.2%  | 8         | 0.1%  | 8         | 0.3%  |
| mmu-mir-185-5p | 16  | 18327531 | 18327552 | -      | edit    | 18       | 12       | 0.2%  | 37        | 0.7%  | 26        | 1.0%  |
| mmu-mir-185-5p | 16  | 18327531 | 18327552 | -      | edit    | 19       | 95       | 1.4%  | 57        | 1.1%  | 35        | 1.3%  |
| mmu-mir-185-5p | 16  | 18327531 | 18327552 | -      | edit    | 20       | 3        | 0.0%  | 0         | 0.0%  | 0         | 0.0%  |
| mmu-mir-185-5p | 16  | 18327531 | 18327552 | -      | edit    | 21       | 0        | 0.0%  | 0         | 0.0%  | 0         | 0.0%  |
| mmu-mir-185-5p | 16  | 18327531 | 18327552 | -      | edit    | 22       | 0        | 0.0%  | 8         | 0.1%  | 0         | 0.0%  |
| EDITED         |     |          |          |        |         |          | 165      | 2.5%  | 126       | 2.4%  | 81        | 3.0%  |
| CANONICAL      |     |          |          |        |         |          | 6476     | 97.5% | 5028      | 97.6% | 2595      | 97.0% |
| TOTAL          |     |          |          |        |         |          | 6641     |       | 5154      |       | 2676      |       |

| miRNA          | Chr | Start     | Stop      | Strand | Type     | Position | P7 reads | P7%   | P10 reads | P10%  | P14 reads | P14%  |
|----------------|-----|-----------|-----------|--------|----------|----------|----------|-------|-----------|-------|-----------|-------|
| mmu-mir-191-5p | 9   | 108470656 | 108470678 | +      | 3' Edit  | 3'       | 0        | 0.0%  | 0         | 0.0%  | 3         | 0.0%  |
| mmu-mir-191-5p | 9   | 108470656 | 108470678 | +      | 3' Indel | 3'       | 54       | 0.5%  | 0         | 0.0%  | 62        | 0.7%  |
| mmu-mir-191-5p | 9   | 108470656 | 108470678 | +      | Indel    | 22       | 4        | 0.0%  | 0         | 0.0%  | 0         | 0.0%  |
| mmu-mir-191-5p | 9   | 108470656 | 108470678 | +      | Indel    | 23       | 0        | 0.0%  | 3         | 0.1%  | 0         | 0.0%  |
| mmu-mir-191-5p | 9   | 108470656 | 108470678 | +      | edit     | 1        | 0        | 0.0%  | 0         | 0.0%  | 0         | 0.0%  |
| mmu-mir-191-5p | 9   | 108470656 | 108470678 | +      | edit     | 2        | 0        | 0.0%  | 0         | 0.0%  | 0         | 0.0%  |
| mmu-mir-191-5p | 9   | 108470656 | 108470678 | +      | edit     | 3        | 0        | 0.0%  | 0         | 0.0%  | 0         | 0.0%  |
| mmu-mir-191-5p | 9   | 108470656 | 108470678 | +      | edit     | 4        | 5        | 0.0%  | 3         | 0.1%  | 8         | 0.1%  |
| mmu-mir-191-5p | 9   | 108470656 | 108470678 | +      | edit     | 5        | 0        | 0.0%  | 0         | 0.0%  | 0         | 0.0%  |
| mmu-mir-191-5p | 9   | 108470656 | 108470678 | +      | edit     | 6        | 4        | 0.0%  | 0         | 0.0%  | 5         | 0.1%  |
| mmu-mir-191-5p | 9   | 108470656 | 108470678 | +      | edit     | 7        | 0        | 0.0%  | 0         | 0.0%  | 0         | 0.0%  |
| mmu-mir-191-5p | 9   | 108470656 | 108470678 | +      | edit     | 8        | 5        | 0.0%  | 3         | 0.1%  | 0         | 0.0%  |
| mmu-mir-191-5p | 9   | 108470656 | 108470678 | +      | edit     | 9        | 0        | 0.0%  | 0         | 0.0%  | 0         | 0.0%  |
| mmu-mir-191-5p | 9   | 108470656 | 108470678 | +      | edit     | 10       | 25       | 0.2%  | 5         | 0.1%  | 31        | 0.3%  |
| mmu-mir-191-5p | 9   | 108470656 | 108470678 | +      | edit     | 11       | 3        | 0.0%  | 0         | 0.0%  | 6         | 0.1%  |
| mmu-mir-191-5p | 9   | 108470656 | 108470678 | +      | edit     | 12       | 4        | 0.0%  | 0         | 0.0%  | 7         | 0.1%  |
| mmu-mir-191-5p | 9   | 108470656 | 108470678 | +      | edit     | 13       | 0        | 0.0%  | 0         | 0.0%  | 8         | 0.1%  |
| mmu-mir-191-5p | 9   | 108470656 | 108470678 | +      | edit     | 14       | 0        | 0.0%  | 3         | 0.1%  | 0         | 0.0%  |
| mmu-mir-191-5p | 9   | 108470656 | 108470678 | +      | edit     | 15       | 15       | 0.1%  | 167       | 2.9%  | 21        | 0.2%  |
| mmu-mir-191-5p | 9   | 108470656 | 108470678 | +      | edit     | 16       | 0        | 0.0%  | 3         | 0.1%  | 0         | 0.0%  |
| mmu-mir-191-5p | 9   | 108470656 | 108470678 | +      | edit     | 17       | 13       | 0.1%  | 0         | 0.0%  | 10        | 0.1%  |
| mmu-mir-191-5p | 9   | 108470656 | 108470678 | +      | edit     | 18       | 0        | 0.0%  | 0         | 0.0%  | 0         | 0.0%  |
| mmu-mir-191-5p | 9   | 108470656 | 108470678 | +      | edit     | 19       | 30       | 0.3%  | 56        | 1.0%  | 33        | 0.3%  |
| mmu-mir-191-5p | 9   | 108470656 | 108470678 | +      | edit     | 20       | 0        | 0.0%  | 0         | 0.0%  | 0         | 0.0%  |
| mmu-mir-191-5p | 9   | 108470656 | 108470678 | +      | edit     | 21       | 47       | 0.5%  | 16        | 0.3%  | 74        | 0.8%  |
| mmu-mir-191-5p | 9   | 108470656 | 108470678 | +      | edit     | 22       | 20       | 0.2%  | 0         | 0.0%  | 21        | 0.2%  |
| EDITED         |     |           |           |        |          |          | 229      | 2.2%  | 259       | 4.5%  | 288       | 3.0%  |
| CANONICAL      |     |           |           |        |          |          | 9954     | 97.8% | 5513      | 95.5% | 9206      | 97.0% |
| TOTAL          |     |           |           |        |          |          | 10183    |       | 5772      |       | 9494      |       |

| miRNA          | Chr | Start   | Stop    | Strand | Type  | Position | P7 reads | P7%   | P10 reads | P10%  | P14 reads | P14%  |
|----------------|-----|---------|---------|--------|-------|----------|----------|-------|-----------|-------|-----------|-------|
| mmu-mir-192-5p | 19  | 6264857 | 6264877 | +      | Indel | 21       | 0        | 0.0%  | 3         | 0.1%  | 12        | 0.4%  |
| mmu-mir-192-5p | 19  | 6264857 | 6264877 | +      | edit  | 1        | 0        | 0.0%  | 0         | 0.0%  | 0         | 0.0%  |
| mmu-mir-192-5p | 19  | 6264857 | 6264877 | +      | edit  | 2        | 0        | 0.0%  | 0         | 0.0%  | 0         | 0.0%  |
| mmu-mir-192-5p | 19  | 6264857 | 6264877 | +      | edit  | 3        | 0        | 0.0%  | 0         | 0.0%  | 0         | 0.0%  |
| mmu-mir-192-5p | 19  | 6264857 | 6264877 | +      | edit  | 4        | 0        | 0.0%  | 0         | 0.0%  | 0         | 0.0%  |
| mmu-mir-192-5p | 19  | 6264857 | 6264877 | +      | edit  | 5        | 0        | 0.0%  | 0         | 0.0%  | 0         | 0.0%  |
| mmu-mir-192-5p | 19  | 6264857 | 6264877 | +      | edit  | 6        | 0        | 0.0%  | 0         | 0.0%  | 5         | 0.1%  |
| mmu-mir-192-5p | 19  | 6264857 | 6264877 | +      | edit  | 7        | 0        | 0.0%  | 0         | 0.0%  | 0         | 0.0%  |
| mmu-mir-192-5p | 19  | 6264857 | 6264877 | +      | edit  | 8        | 0        | 0.0%  | 0         | 0.0%  | 0         | 0.0%  |
| mmu-mir-192-5p | 19  | 6264857 | 6264877 | +      | edit  | 9        | 0        | 0.0%  | 0         | 0.0%  | 0         | 0.0%  |
| mmu-mir-192-5p | 19  | 6264857 | 6264877 | +      | edit  | 10       | 0        | 0.0%  | 0         | 0.0%  | 0         | 0.0%  |
| mmu-mir-192-5p | 19  | 6264857 | 6264877 | +      | edit  | 11       | 0        | 0.0%  | 0         | 0.0%  | 0         | 0.0%  |
| mmu-mir-192-5p | 19  | 6264857 | 6264877 | +      | edit  | 12       | 0        | 0.0%  | 0         | 0.0%  | 0         | 0.0%  |
| mmu-mir-192-5p | 19  | 6264857 | 6264877 | +      | edit  | 13       | 0        | 0.0%  | 0         | 0.0%  | 0         | 0.0%  |
| mmu-mir-192-5p | 19  | 6264857 | 6264877 | +      | edit  | 14       | 0        | 0.0%  | 0         | 0.0%  | 0         | 0.0%  |
| mmu-mir-192-5p | 19  | 6264857 | 6264877 | +      | edit  | 15       | 0        | 0.0%  | 0         | 0.0%  | 7         | 0.2%  |
| mmu-mir-192-5p | 19  | 6264857 | 6264877 | +      | edit  | 16       | 0        | 0.0%  | 0         | 0.0%  | 0         | 0.0%  |
| mmu-mir-192-5p | 19  | 6264857 | 6264877 | +      | edit  | 17       | 0        | 0.0%  | 0         | 0.0%  | 0         | 0.0%  |
| mmu-mir-192-5p | 19  | 6264857 | 6264877 | +      | edit  | 18       | 0        | 0.0%  | 0         | 0.0%  | 0         | 0.0%  |
| mmu-mir-192-5p | 19  | 6264857 | 6264877 | +      | edit  | 19       | 3        | 0.1%  | 3         | 0.1%  | 5         | 0.1%  |
| mmu-mir-192-5p | 19  | 6264857 | 6264877 | +      | edit  | 20       | 0        | 0.0%  | 9         | 0.4%  | 8         | 0.2%  |
| mmu-mir-192-5p | 19  | 6264857 | 6264877 | +      | edit  | 21       | 0        | 0.0%  | 0         | 0.0%  | 0         | 0.0%  |
| mmu-mir-192-5p | 19  | 6264857 | 6264877 | +      | edit  | 22       | 0        | 0.0%  | 0         | 0.0%  | 0         | 0.0%  |
| EDITED         |     |         |         |        |       |          | 3        | 0.1%  | 15        | 0.7%  | 37        | 1.1%  |
| CANONICAL      |     |         |         |        |       |          | 2982     | 99.9% | 2233      | 99.3% | 3389      | 98.9% |
| TOTAL          |     |         |         |        |       |          | 2985     |       | 2248      |       | 3426      |       |

| miRNA          | Chr | Start    | Stop     | Strand | Type | Position | P7 reads | P7%    | P10 reads | P10%   | P14 reads | P14%  |
|----------------|-----|----------|----------|--------|------|----------|----------|--------|-----------|--------|-----------|-------|
| mmu-mir-193-3p | 11  | 79525511 | 79525532 | +      | edit | 1        | 0        | 0.0%   | 0         | 0.0%   | 0         | 0.0%  |
| mmu-mir-193-3p | 11  | 79525511 | 79525532 | +      | edit | 2        | 0        | 0.0%   | 0         | 0.0%   | 0         | 0.0%  |
| mmu-mir-193-3p | 11  | 79525511 | 79525532 | +      | edit | 3        | 0        | 0.0%   | 0         | 0.0%   | 0         | 0.0%  |
| mmu-mir-193-3p | 11  | 79525511 | 79525532 | +      | edit | 4        | 0        | 0.0%   | 0         | 0.0%   | 3         | 6.0%  |
| mmu-mir-193-3p | 11  | 79525511 | 79525532 | +      | edit | 5        | 0        | 0.0%   | 0         | 0.0%   | 0         | 0.0%  |
| mmu-mir-193-3p | 11  | 79525511 | 79525532 | +      | edit | 6        | 0        | 0.0%   | 0         | 0.0%   | 0         | 0.0%  |
| mmu-mir-193-3p | 11  | 79525511 | 79525532 | +      | edit | 7        | 0        | 0.0%   | 0         | 0.0%   | 0         | 0.0%  |
| mmu-mir-193-3p | 11  | 79525511 | 79525532 | +      | edit | 8        | 0        | 0.0%   | 0         | 0.0%   | 0         | 0.0%  |
| mmu-mir-193-3p | 11  | 79525511 | 79525532 | +      | edit | 9        | 0        | 0.0%   | 0         | 0.0%   | 0         | 0.0%  |
| mmu-mir-193-3p | 11  | 79525511 | 79525532 | +      | edit | 10       | 0        | 0.0%   | 0         | 0.0%   | 0         | 0.0%  |
| mmu-mir-193-3p | 11  | 79525511 | 79525532 | +      | edit | 11       | 0        | 0.0%   | 0         | 0.0%   | 0         | 0.0%  |
| mmu-mir-193-3p | 11  | 79525511 | 79525532 | +      | edit | 12       | 0        | 0.0%   | 0         | 0.0%   | 0         | 0.0%  |
| mmu-mir-193-3p | 11  | 79525511 | 79525532 | +      | edit | 13       | 0        | 0.0%   | 0         | 0.0%   | 0         | 0.0%  |
| mmu-mir-193-3p | 11  | 79525511 | 79525532 | +      | edit | 14       | 0        | 0.0%   | 0         | 0.0%   | 0         | 0.0%  |
| mmu-mir-193-3p | 11  | 79525511 | 79525532 | +      | edit | 15       | 0        | 0.0%   | 0         | 0.0%   | 0         | 0.0%  |
| mmu-mir-193-3p | 11  | 79525511 | 79525532 | +      | edit | 16       | 0        | 0.0%   | 0         | 0.0%   | 0         | 0.0%  |
| mmu-mir-193-3p | 11  | 79525511 | 79525532 | +      | edit | 17       | 0        | 0.0%   | 0         | 0.0%   | 0         | 0.0%  |
| mmu-mir-193-3p | 11  | 79525511 | 79525532 | +      | edit | 18       | 0        | 0.0%   | 0         | 0.0%   | 0         | 0.0%  |
| mmu-mir-193-3p | 11  | 79525511 | 79525532 | +      | edit | 19       | 0        | 0.0%   | 0         | 0.0%   | 0         | 0.0%  |
| mmu-mir-193-3p | 11  | 79525511 | 79525532 | +      | edit | 20       | 0        | 0.0%   | 0         | 0.0%   | 0         | 0.0%  |
| mmu-mir-193-3p | 11  | 79525511 | 79525532 | +      | edit | 21       | 0        | 0.0%   | 0         | 0.0%   | 0         | 0.0%  |
| mmu-mir-193-3p | 11  | 79525511 | 79525532 | +      | edit | 22       | 0        | 0.0%   | 0         | 0.0%   | 0         | 0.0%  |
| EDITED         |     |          |          |        |      |          | 0        | 0.0%   | 0         | 0.0%   | 3         | 6.0%  |
| CANONICAL      |     |          |          |        |      |          | 109      | 100.0% | 72        | 100.0% | 47        | 94.0% |
| TOTAL          |     |          |          |        |      |          | 109      |        | 72        |        | 50        |       |

| miRNA             | Chr | Start    | Stop     | Strand | Type    | Position | P7 reads | P7%   | P10 reads | P10%  | P14 reads | P14%  |
|-------------------|-----|----------|----------|--------|---------|----------|----------|-------|-----------|-------|-----------|-------|
| mmu-mir-199a-1-3p | 9   | 21300942 | 21300963 | -      | 5' Edit | 5'       | 6        | 0.0%  | 0         | 0.0%  | 0         | 0.0%  |
| mmu-mir-199a-1-3p | 9   | 21300942 | 21300963 | -      | edit    | 1        | 0        | 0.0%  | 0         | 0.0%  | 0         | 0.0%  |
| mmu-mir-199a-1-3p | 9   | 21300942 | 21300963 | -      | edit    | 2        | 0        | 0.0%  | 0         | 0.0%  | 0         | 0.0%  |
| mmu-mir-199a-1-3p | 9   | 21300942 | 21300963 | -      | edit    | 3        | 0        | 0.0%  | 0         | 0.0%  | 0         | 0.0%  |
| mmu-mir-199a-1-3p | 9   | 21300942 | 21300963 | -      | edit    | 4        | 16       | 0.0%  | 3         | 0.0%  | 0         | 0.0%  |
| mmu-mir-199a-1-3p | 9   | 21300942 | 21300963 | -      | edit    | 5        | 6        | 0.0%  | 0         | 0.0%  | 0         | 0.0%  |
| mmu-mir-199a-1-3p | 9   | 21300942 | 21300963 | -      | edit    | 6        | 13       | 0.0%  | 0         | 0.0%  | 0         | 0.0%  |
| mmu-mir-199a-1-3p | 9   | 21300942 | 21300963 | -      | edit    | 7        | 3        | 0.0%  | 0         | 0.0%  | 0         | 0.0%  |
| mmu-mir-199a-1-3p | 9   | 21300942 | 21300963 | -      | edit    | 8        | 130      | 0.2%  | 18        | 0.1%  | 19        | 0.1%  |
| mmu-mir-199a-1-3p | 9   | 21300942 | 21300963 | -      | edit    | 9        | 0        | 0.0%  | 0         | 0.0%  | 0         | 0.0%  |
| mmu-mir-199a-1-3p | 9   | 21300942 | 21300963 | -      | edit    | 10       | 0        | 0.0%  | 0         | 0.0%  | 0         | 0.0%  |
| mmu-mir-199a-1-3p | 9   | 21300942 | 21300963 | -      | edit    | 11       | 0        | 0.0%  | 0         | 0.0%  | 0         | 0.0%  |
| mmu-mir-199a-1-3p | 9   | 21300942 | 21300963 | -      | edit    | 12       | 0        | 0.0%  | 0         | 0.0%  | 0         | 0.0%  |
| mmu-mir-199a-1-3p | 9   | 21300942 | 21300963 | -      | edit    | 13       | 0        | 0.0%  | 0         | 0.0%  | 0         | 0.0%  |
| mmu-mir-199a-1-3p | 9   | 21300942 | 21300963 | -      | edit    | 14       | 12       | 0.0%  | 4         | 0.0%  | 0         | 0.0%  |
| mmu-mir-199a-1-3p | 9   | 21300942 | 21300963 | -      | edit    | 15       | 98       | 0.1%  | 269       | 0.9%  | 21        | 0.1%  |
| mmu-mir-199a-1-3p | 9   | 21300942 | 21300963 | -      | edit    | 16       | 136      | 0.2%  | 21        | 0.1%  | 23        | 0.1%  |
| mmu-mir-199a-1-3p | 9   | 21300942 | 21300963 | -      | edit    | 17       | 69       | 0.1%  | 18        | 0.1%  | 17        | 0.1%  |
| mmu-mir-199a-1-3p | 9   | 21300942 | 21300963 | -      | edit    | 18       | 8        | 0.0%  | 4         | 0.0%  | 0         | 0.0%  |
| mmu-mir-199a-1-3p | 9   | 21300942 | 21300963 | -      | edit    | 19       | 101      | 0.1%  | 41        | 0.1%  | 11        | 0.1%  |
| mmu-mir-199a-1-3p | 9   | 21300942 | 21300963 | -      | edit    | 20       | 0        | 0.0%  | 0         | 0.0%  | 0         | 0.0%  |
| mmu-mir-199a-1-3p | 9   | 21300942 | 21300963 | -      | edit    | 21       | 0        | 0.0%  | 0         | 0.0%  | 0         | 0.0%  |
| mmu-mir-199a-1-3p | 9   | 21300942 | 21300963 | -      | edit    | 22       | 7        | 0.0%  | 0         | 0.0%  | 0         | 0.0%  |
| EDITED            |     |          |          |        |         |          | 605      | 0.8%  | 377       | 1.2%  | 90        | 0.5%  |
| CANONICAL         |     |          |          |        |         |          | 77201    | 99.2% | 29801     | 98.8% | 16413     | 99.5% |
| TOTAL             |     |          |          |        |         |          | 77806    |       | 30178     |       | 16503     |       |



| miRNA             | Chr | Start    | Stop     | Strand | Type | Position | P7 reads | P7%   | P10 reads | P10%  | P14 reads | P14%  |
|-------------------|-----|----------|----------|--------|------|----------|----------|-------|-----------|-------|-----------|-------|
| mmu-mir-199a-1-5p | 9   | 21300981 | 21301003 | -      | edit | 1        | 0        | 0.0%  | 0         | 0.0%  | 0         | 0.0%  |
| mmu-mir-199a-1-5p | 9   | 21300981 | 21301003 | -      | edit | 2        | 0        | 0.0%  | 0         | 0.0%  | 0         | 0.0%  |
| mmu-mir-199a-1-5p | 9   | 21300981 | 21301003 | -      | edit | 3        | 0        | 0.0%  | 0         | 0.0%  | 0         | 0.0%  |
| mmu-mir-199a-1-5p | 9   | 21300981 | 21301003 | -      | edit | 4        | 0        | 0.0%  | 0         | 0.0%  | 0         | 0.0%  |
| mmu-mir-199a-1-5p | 9   | 21300981 | 21301003 | -      | edit | 5        | 0        | 0.0%  | 0         | 0.0%  | 0         | 0.0%  |
| mmu-mir-199a-1-5p | 9   | 21300981 | 21301003 | -      | edit | 6        | 0        | 0.0%  | 0         | 0.0%  | 0         | 0.0%  |
| mmu-mir-199a-1-5p | 9   | 21300981 | 21301003 | -      | edit | 7        | 0        | 0.0%  | 0         | 0.0%  | 0         | 0.0%  |
| mmu-mir-199a-1-5p | 9   | 21300981 | 21301003 | -      | edit | 8        | 0        | 0.0%  | 0         | 0.0%  | 0         | 0.0%  |
| mmu-mir-199a-1-5p | 9   | 21300981 | 21301003 | -      | edit | 9        | 0        | 0.0%  | 0         | 0.0%  | 0         | 0.0%  |
| mmu-mir-199a-1-5p | 9   | 21300981 | 21301003 | -      | edit | 10       | 0        | 0.0%  | 0         | 0.0%  | 0         | 0.0%  |
| mmu-mir-199a-1-5p | 9   | 21300981 | 21301003 | -      | edit | 11       | 0        | 0.0%  | 0         | 0.0%  | 0         | 0.0%  |
| mmu-mir-199a-1-5p | 9   | 21300981 | 21301003 | -      | edit | 12       | 0        | 0.0%  | 0         | 0.0%  | 0         | 0.0%  |
| mmu-mir-199a-1-5p | 9   | 21300981 | 21301003 | -      | edit | 13       | 0        | 0.0%  | 0         | 0.0%  | 0         | 0.0%  |
| mmu-mir-199a-1-5p | 9   | 21300981 | 21301003 | -      | edit | 14       | 0        | 0.0%  | 0         | 0.0%  | 0         | 0.0%  |
| mmu-mir-199a-1-5p | 9   | 21300981 | 21301003 | -      | edit | 15       | 0        | 0.0%  | 0         | 0.0%  | 0         | 0.0%  |
| mmu-mir-199a-1-5p | 9   | 21300981 | 21301003 | -      | edit | 16       | 0        | 0.0%  | 0         | 0.0%  | 0         | 0.0%  |
| mmu-mir-199a-1-5p | 9   | 21300981 | 21301003 | -      | edit | 17       | 11       | 3.2%  | 7         | 4.7%  | 4         | 4.7%  |
| mmu-mir-199a-1-5p | 9   | 21300981 | 21301003 | -      | edit | 18       | 0        | 0.0%  | 0         | 0.0%  | 0         | 0.0%  |
| mmu-mir-199a-1-5p | 9   | 21300981 | 21301003 | -      | edit | 19       | 0        | 0.0%  | 0         | 0.0%  | 0         | 0.0%  |
| mmu-mir-199a-1-5p | 9   | 21300981 | 21301003 | -      | edit | 20       | 0        | 0.0%  | 0         | 0.0%  | 0         | 0.0%  |
| mmu-mir-199a-1-5p | 9   | 21300981 | 21301003 | -      | edit | 21       | 0        | 0.0%  | 0         | 0.0%  | 0         | 0.0%  |
| mmu-mir-199a-1-5p | 9   | 21300981 | 21301003 | -      | edit | 22       | 0        | 0.0%  | 0         | 0.0%  | 0         | 0.0%  |
| EDITED            |     |          |          |        |      |          | 11       | 3.2%  | 7         | 4.7%  | 4         | 4.7%  |
| CANONICAL         |     |          |          |        |      |          | 331      | 96.8% | 142       | 95.3% | 82        | 95.3% |
| TOTAL             |     |          |          |        |      |          | 342      |       | 149       |       | 86        |       |

| miRNA             | Chr | Start     | Stop      | Strand | Type    | Position | P7 reads | P7%   | P10 reads | P10%  | P14 reads | P14%  |
|-------------------|-----|-----------|-----------|--------|---------|----------|----------|-------|-----------|-------|-----------|-------|
| mmu-mir-199a-2-3p | 1   | 164148014 | 164148035 | +      | 3' Edit | 3'       | 58       | 0.1%  | 0         | 0.0%  | 15        | 0.1%  |
| mmu-mir-199a-2-3p | 1   | 164148014 | 164148035 | +      | Indel   | 19       | 16       | 0.0%  | 3         | 0.0%  | 0         | 0.0%  |
| mmu-mir-199a-2-3p | 1   | 164148014 | 164148035 | +      | Indel   | 20       | 15       | 0.0%  | 0         | 0.0%  | 3         | 0.0%  |
| mmu-mir-199a-2-3p | 1   | 164148014 | 164148035 | +      | Indel   | 21       | 0        | 0.0%  | 0         | 0.0%  | 0         | 0.0%  |
| mmu-mir-199a-2-3p | 1   | 164148014 | 164148035 | +      | Indel   | 22       | 13       | 0.0%  | 0         | 0.0%  | 0         | 0.0%  |
| mmu-mir-199a-2-3p | 1   | 164148014 | 164148035 | +      | edit    | 1        | 0        | 0.0%  | 0         | 0.0%  | 0         | 0.0%  |
| mmu-mir-199a-2-3p | 1   | 164148014 | 164148035 | +      | edit    | 2        | 0        | 0.0%  | 0         | 0.0%  | 0         | 0.0%  |
| mmu-mir-199a-2-3p | 1   | 164148014 | 164148035 | +      | edit    | 3        | 0        | 0.0%  | 0         | 0.0%  | 0         | 0.0%  |
| mmu-mir-199a-2-3p | 1   | 164148014 | 164148035 | +      | edit    | 4        | 16       | 0.0%  | 3         | 0.0%  | 0         | 0.0%  |
| mmu-mir-199a-2-3p | 1   | 164148014 | 164148035 | +      | edit    | 5        | 6        | 0.0%  | 0         | 0.0%  | 0         | 0.0%  |
| mmu-mir-199a-2-3p | 1   | 164148014 | 164148035 | +      | edit    | 6        | 13       | 0.0%  | 0         | 0.0%  | 0         | 0.0%  |
| mmu-mir-199a-2-3p | 1   | 164148014 | 164148035 | +      | edit    | 7        | 3        | 0.0%  | 0         | 0.0%  | 0         | 0.0%  |
| mmu-mir-199a-2-3p | 1   | 164148014 | 164148035 | +      | edit    | 8        | 130      | 0.2%  | 18        | 0.1%  | 19        | 0.1%  |
| mmu-mir-199a-2-3p | 1   | 164148014 | 164148035 | +      | edit    | 9        | 0        | 0.0%  | 0         | 0.0%  | 0         | 0.0%  |
| mmu-mir-199a-2-3p | 1   | 164148014 | 164148035 | +      | edit    | 10       | 0        | 0.0%  | 0         | 0.0%  | 0         | 0.0%  |
| mmu-mir-199a-2-3p | 1   | 164148014 | 164148035 | +      | edit    | 11       | 0        | 0.0%  | 0         | 0.0%  | 0         | 0.0%  |
| mmu-mir-199a-2-3p | 1   | 164148014 | 164148035 | +      | edit    | 12       | 0        | 0.0%  | 0         | 0.0%  | 0         | 0.0%  |
| mmu-mir-199a-2-3p | 1   | 164148014 | 164148035 | +      | edit    | 13       | 0        | 0.0%  | 0         | 0.0%  | 0         | 0.0%  |
| mmu-mir-199a-2-3p | 1   | 164148014 | 164148035 | +      | edit    | 14       | 12       | 0.0%  | 4         | 0.0%  | 3         | 0.0%  |
| mmu-mir-199a-2-3p | 1   | 164148014 | 164148035 | +      | edit    | 15       | 99       | 0.1%  | 268       | 0.9%  | 21        | 0.1%  |
| mmu-mir-199a-2-3p | 1   | 164148014 | 164148035 | +      | edit    | 16       | 136      | 0.2%  | 21        | 0.1%  | 23        | 0.1%  |
| mmu-mir-199a-2-3p | 1   | 164148014 | 164148035 | +      | edit    | 17       | 68       | 0.1%  | 19        | 0.1%  | 17        | 0.1%  |
| mmu-mir-199a-2-3p | 1   | 164148014 | 164148035 | +      | edit    | 18       | 8        | 0.0%  | 4         | 0.0%  | 0         | 0.0%  |
| mmu-mir-199a-2-3p | 1   | 164148014 | 164148035 | +      | edit    | 19       | 102      | 0.1%  | 41        | 0.1%  | 11        | 0.1%  |
| mmu-mir-199a-2-3p | 1   | 164148014 | 164148035 | +      | edit    | 20       | 0        | 0.0%  | 0         | 0.0%  | 0         | 0.0%  |
| mmu-mir-199a-2-3p | 1   | 164148014 | 164148035 | +      | edit    | 21       | 3        | 0.0%  | 0         | 0.0%  | 0         | 0.0%  |
| mmu-mir-199a-2-3p | 1   | 164148014 | 164148035 | +      | edit    | 22       | 11       | 0.0%  | 0         | 0.0%  | 0         | 0.0%  |
| EDITED            |     |           |           |        |         |          | 709      | 0.9%  | 380       | 1.3%  | 111       | 0.7%  |
| CANONICAL         |     |           |           |        |         |          | 76979    | 99.1% | 29732     | 98.7% | 16386     | 99.3% |
| TOTAL             |     |           |           |        |         |          | 77688    |       | 30112     |       | 16497     |       |

| miRNA             | Chr | Start     | Stop      | Strand | Type | Position | P7 reads | P7%   | P10 reads | P10%  | P14 reads | P14%  |
|-------------------|-----|-----------|-----------|--------|------|----------|----------|-------|-----------|-------|-----------|-------|
| mmu-mir-199a-2-5p | 1   | 164147975 | 164147997 | +      | edit | 1        | 0        | 0.0%  | 0         | 0.0%  | 0         | 0.0%  |
| mmu-mir-199a-2-5p | 1   | 164147975 | 164147997 | +      | edit | 2        | 0        | 0.0%  | 0         | 0.0%  | 0         | 0.0%  |
| mmu-mir-199a-2-5p | 1   | 164147975 | 164147997 | +      | edit | 3        | 0        | 0.0%  | 0         | 0.0%  | 0         | 0.0%  |
| mmu-mir-199a-2-5p | 1   | 164147975 | 164147997 | +      | edit | 4        | 0        | 0.0%  | 0         | 0.0%  | 0         | 0.0%  |
| mmu-mir-199a-2-5p | 1   | 164147975 | 164147997 | +      | edit | 5        | 0        | 0.0%  | 0         | 0.0%  | 0         | 0.0%  |
| mmu-mir-199a-2-5p | 1   | 164147975 | 164147997 | +      | edit | 6        | 0        | 0.0%  | 0         | 0.0%  | 0         | 0.0%  |
| mmu-mir-199a-2-5p | 1   | 164147975 | 164147997 | +      | edit | 7        | 0        | 0.0%  | 0         | 0.0%  | 0         | 0.0%  |
| mmu-mir-199a-2-5p | 1   | 164147975 | 164147997 | +      | edit | 8        | 0        | 0.0%  | 0         | 0.0%  | 0         | 0.0%  |
| mmu-mir-199a-2-5p | 1   | 164147975 | 164147997 | +      | edit | 9        | 0        | 0.0%  | 0         | 0.0%  | 0         | 0.0%  |
| mmu-mir-199a-2-5p | 1   | 164147975 | 164147997 | +      | edit | 10       | 0        | 0.0%  | 0         | 0.0%  | 0         | 0.0%  |
| mmu-mir-199a-2-5p | 1   | 164147975 | 164147997 | +      | edit | 11       | 0        | 0.0%  | 0         | 0.0%  | 0         | 0.0%  |
| mmu-mir-199a-2-5p | 1   | 164147975 | 164147997 | +      | edit | 12       | 0        | 0.0%  | 0         | 0.0%  | 0         | 0.0%  |
| mmu-mir-199a-2-5p | 1   | 164147975 | 164147997 | +      | edit | 13       | 0        | 0.0%  | 0         | 0.0%  | 0         | 0.0%  |
| mmu-mir-199a-2-5p | 1   | 164147975 | 164147997 | +      | edit | 14       | 0        | 0.0%  | 0         | 0.0%  | 0         | 0.0%  |
| mmu-mir-199a-2-5p | 1   | 164147975 | 164147997 | +      | edit | 15       | 0        | 0.0%  | 0         | 0.0%  | 0         | 0.0%  |
| mmu-mir-199a-2-5p | 1   | 164147975 | 164147997 | +      | edit | 16       | 0        | 0.0%  | 0         | 0.0%  | 0         | 0.0%  |
| mmu-mir-199a-2-5p | 1   | 164147975 | 164147997 | +      | edit | 17       | 11       | 3.4%  | 7         | 4.9%  | 4         | 5.1%  |
| mmu-mir-199a-2-5p | 1   | 164147975 | 164147997 | +      | edit | 18       | 0        | 0.0%  | 0         | 0.0%  | 0         | 0.0%  |
| mmu-mir-199a-2-5p | 1   | 164147975 | 164147997 | +      | edit | 19       | 0        | 0.0%  | 0         | 0.0%  | 0         | 0.0%  |
| mmu-mir-199a-2-5p | 1   | 164147975 | 164147997 | +      | edit | 20       | 0        | 0.0%  | 0         | 0.0%  | 0         | 0.0%  |
| mmu-mir-199a-2-5p | 1   | 164147975 | 164147997 | +      | edit | 21       | 0        | 0.0%  | 0         | 0.0%  | 0         | 0.0%  |
| mmu-mir-199a-2-5p | 1   | 164147975 | 164147997 | +      | edit | 22       | 0        | 0.0%  | 0         | 0.0%  | 0         | 0.0%  |
| EDITED            |     |           |           |        |      |          | 11       | 3.4%  | 7         | 4.9%  | 4         | 5.1%  |
| CANONICAL         |     |           |           |        |      |          | 311      | 96.6% | 136       | 95.1% | 74        | 94.9% |
| TOTAL             |     |           |           |        |      |          | 322      |       | 143       |       | 78        |       |

| miRNA           | Chr | Start    | Stop     | Strand | Type    | Position | P7 reads | P7%   | P10 reads | P10%  | P14 reads | P14%  |
|-----------------|-----|----------|----------|--------|---------|----------|----------|-------|-----------|-------|-----------|-------|
| mmu-mir-199b-3p | 2   | 32174044 | 32174065 | +      | 3' Edit | 3'       | 5        | 0.0%  | 0         | 0.0%  | 0         | 0.0%  |
| mmu-mir-199b-3p | 2   | 32174044 | 32174065 | +      | edit    | 1        | 0        | 0.0%  | 0         | 0.0%  | 0         | 0.0%  |
| mmu-mir-199b-3p | 2   | 32174044 | 32174065 | +      | edit    | 2        | 0        | 0.0%  | 0         | 0.0%  | 0         | 0.0%  |
| mmu-mir-199b-3p | 2   | 32174044 | 32174065 | +      | edit    | 3        | 0        | 0.0%  | 0         | 0.0%  | 0         | 0.0%  |
| mmu-mir-199b-3p | 2   | 32174044 | 32174065 | +      | edit    | 4        | 16       | 0.0%  | 3         | 0.0%  | 0         | 0.0%  |
| mmu-mir-199b-3p | 2   | 32174044 | 32174065 | +      | edit    | 5        | 6        | 0.0%  | 0         | 0.0%  | 0         | 0.0%  |
| mmu-mir-199b-3p | 2   | 32174044 | 32174065 | +      | edit    | 6        | 13       | 0.0%  | 0         | 0.0%  | 0         | 0.0%  |
| mmu-mir-199b-3p | 2   | 32174044 | 32174065 | +      | edit    | 7        | 3        | 0.0%  | 0         | 0.0%  | 0         | 0.0%  |
| mmu-mir-199b-3p | 2   | 32174044 | 32174065 | +      | edit    | 8        | 130      | 0.2%  | 18        | 0.1%  | 19        | 0.1%  |
| mmu-mir-199b-3p | 2   | 32174044 | 32174065 | +      | edit    | 9        | 0        | 0.0%  | 0         | 0.0%  | 0         | 0.0%  |
| mmu-mir-199b-3p | 2   | 32174044 | 32174065 | +      | edit    | 10       | 0        | 0.0%  | 0         | 0.0%  | 0         | 0.0%  |
| mmu-mir-199b-3p | 2   | 32174044 | 32174065 | +      | edit    | 11       | 0        | 0.0%  | 0         | 0.0%  | 0         | 0.0%  |
| mmu-mir-199b-3p | 2   | 32174044 | 32174065 | +      | edit    | 12       | 0        | 0.0%  | 0         | 0.0%  | 0         | 0.0%  |
| mmu-mir-199b-3p | 2   | 32174044 | 32174065 | +      | edit    | 13       | 0        | 0.0%  | 0         | 0.0%  | 0         | 0.0%  |
| mmu-mir-199b-3p | 2   | 32174044 | 32174065 | +      | edit    | 14       | 12       | 0.0%  | 4         | 0.0%  | 0         | 0.0%  |
| mmu-mir-199b-3p | 2   | 32174044 | 32174065 | +      | edit    | 15       | 98       | 0.1%  | 269       | 0.9%  | 21        | 0.1%  |
| mmu-mir-199b-3p | 2   | 32174044 | 32174065 | +      | edit    | 16       | 136      | 0.2%  | 21        | 0.1%  | 23        | 0.1%  |
| mmu-mir-199b-3p | 2   | 32174044 | 32174065 | +      | edit    | 17       | 69       | 0.1%  | 18        | 0.1%  | 17        | 0.1%  |
| mmu-mir-199b-3p | 2   | 32174044 | 32174065 | +      | edit    | 18       | 8        | 0.0%  | 4         | 0.0%  | 0         | 0.0%  |
| mmu-mir-199b-3p | 2   | 32174044 | 32174065 | +      | edit    | 19       | 101      | 0.1%  | 41        | 0.1%  | 11        | 0.1%  |
| mmu-mir-199b-3p | 2   | 32174044 | 32174065 | +      | edit    | 20       | 0        | 0.0%  | 0         | 0.0%  | 0         | 0.0%  |
| mmu-mir-199b-3p | 2   | 32174044 | 32174065 | +      | edit    | 21       | 0        | 0.0%  | 0         | 0.0%  | 0         | 0.0%  |
| mmu-mir-199b-3p | 2   | 32174044 | 32174065 | +      | edit    | 22       | 7        | 0.0%  | 0         | 0.0%  | 0         | 0.0%  |
| EDITED          |     |          |          |        |         |          | 604      | 0.8%  | 377       | 1.3%  | 90        | 0.5%  |
| CANONICAL       |     |          |          |        |         |          | 76833    | 99.2% | 29698     | 98.7% | 16354     | 99.5% |
| TOTAL           |     |          |          |        |         |          | 77437    |       | 30075     |       | 16444     |       |

| miRNA           | Chr | Start     | Stop      | Strand | Type | Position | P7 reads | P7%    | P10 reads | P10%  | P14 reads | P14%   |
|-----------------|-----|-----------|-----------|--------|------|----------|----------|--------|-----------|-------|-----------|--------|
| mmu-mir-200a-3p | 4   | 155429020 | 155429041 | -      | edit | 1        | 0        | 0.0%   | 0         | 0.0%  | 0         | 0.0%   |
| mmu-mir-200a-3p | 4   | 155429020 | 155429041 | -      | edit | 2        | 0        | 0.0%   | 0         | 0.0%  | 0         | 0.0%   |
| mmu-mir-200a-3p | 4   | 155429020 | 155429041 | -      | edit | 3        | 0        | 0.0%   | 0         | 0.0%  | 0         | 0.0%   |
| mmu-mir-200a-3p | 4   | 155429020 | 155429041 | -      | edit | 4        | 0        | 0.0%   | 0         | 0.0%  | 0         | 0.0%   |
| mmu-mir-200a-3p | 4   | 155429020 | 155429041 | -      | edit | 5        | 0        | 0.0%   | 0         | 0.0%  | 0         | 0.0%   |
| mmu-mir-200a-3p | 4   | 155429020 | 155429041 | -      | edit | 6        | 0        | 0.0%   | 0         | 0.0%  | 0         | 0.0%   |
| mmu-mir-200a-3p | 4   | 155429020 | 155429041 | -      | edit | 7        | 0        | 0.0%   | 0         | 0.0%  | 0         | 0.0%   |
| mmu-mir-200a-3p | 4   | 155429020 | 155429041 | -      | edit | 8        | 0        | 0.0%   | 0         | 0.0%  | 0         | 0.0%   |
| mmu-mir-200a-3p | 4   | 155429020 | 155429041 | -      | edit | 9        | 0        | 0.0%   | 0         | 0.0%  | 0         | 0.0%   |
| mmu-mir-200a-3p | 4   | 155429020 | 155429041 | -      | edit | 10       | 0        | 0.0%   | 0         | 0.0%  | 0         | 0.0%   |
| mmu-mir-200a-3p | 4   | 155429020 | 155429041 | -      | edit | 11       | 0        | 0.0%   | 0         | 0.0%  | 0         | 0.0%   |
| mmu-mir-200a-3p | 4   | 155429020 | 155429041 | -      | edit | 12       | 0        | 0.0%   | 0         | 0.0%  | 0         | 0.0%   |
| mmu-mir-200a-3p | 4   | 155429020 | 155429041 | -      | edit | 13       | 0        | 0.0%   | 0         | 0.0%  | 0         | 0.0%   |
| mmu-mir-200a-3p | 4   | 155429020 | 155429041 | -      | edit | 14       | 0        | 0.0%   | 0         | 0.0%  | 0         | 0.0%   |
| mmu-mir-200a-3p | 4   | 155429020 | 155429041 | -      | edit | 15       | 0        | 0.0%   | 4         | 1.2%  | 0         | 0.0%   |
| mmu-mir-200a-3p | 4   | 155429020 | 155429041 | -      | edit | 16       | 0        | 0.0%   | 0         | 0.0%  | 0         | 0.0%   |
| mmu-mir-200a-3p | 4   | 155429020 | 155429041 | -      | edit | 17       | 0        | 0.0%   | 0         | 0.0%  | 0         | 0.0%   |
| mmu-mir-200a-3p | 4   | 155429020 | 155429041 | -      | edit | 18       | 0        | 0.0%   | 0         | 0.0%  | 0         | 0.0%   |
| mmu-mir-200a-3p | 4   | 155429020 | 155429041 | -      | edit | 19       | 0        | 0.0%   | 4         | 1.3%  | 0         | 0.0%   |
| mmu-mir-200a-3p | 4   | 155429020 | 155429041 | -      | edit | 20       | 0        | 0.0%   | 0         | 0.0%  | 0         | 0.0%   |
| mmu-mir-200a-3p | 4   | 155429020 | 155429041 | -      | edit | 21       | 0        | 0.0%   | 0         | 0.0%  | 0         | 0.0%   |
| mmu-mir-200a-3p | 4   | 155429020 | 155429041 | -      | edit | 22       | 0        | 0.0%   | 0         | 0.0%  | 0         | 0.0%   |
| EDITED          |     |           |           |        |      |          | 0        | 0.0%   | 8         | 2.5%  | 0         | 0.0%   |
| CANONICAL       |     |           |           |        |      |          | 284      | 100.0% | 296       | 97.5% | 247       | 100.0% |
| TOTAL           |     |           |           |        |      |          | 284      |        | 304       |       | 247       |        |

| miRNA          | Chr | Start     | Stop      | Strand | Type | Position | P7 reads | P7%   | P10 reads | P10%  | P14 reads | P14%   |
|----------------|-----|-----------|-----------|--------|------|----------|----------|-------|-----------|-------|-----------|--------|
| mmu-mir-202-3p | 7   | 147143594 | 147143615 | -      | edit | 1        | 0        | 0.0%  | 0         | 0.0%  | 0         | 0.0%   |
| mmu-mir-202-3p | 7   | 147143594 | 147143615 | -      | edit | 2        | 0        | 0.0%  | 0         | 0.0%  | 0         | 0.0%   |
| mmu-mir-202-3p | 7   | 147143594 | 147143615 | -      | edit | 3        | 0        | 0.0%  | 0         | 0.0%  | 0         | 0.0%   |
| mmu-mir-202-3p | 7   | 147143594 | 147143615 | -      | edit | 4        | 0        | 0.0%  | 0         | 0.0%  | 0         | 0.0%   |
| mmu-mir-202-3p | 7   | 147143594 | 147143615 | -      | edit | 5        | 0        | 0.0%  | 0         | 0.0%  | 0         | 0.0%   |
| mmu-mir-202-3p | 7   | 147143594 | 147143615 | -      | edit | 6        | 0        | 0.0%  | 0         | 0.0%  | 0         | 0.0%   |
| mmu-mir-202-3p | 7   | 147143594 | 147143615 | -      | edit | 7        | 0        | 0.0%  | 0         | 0.0%  | 0         | 0.0%   |
| mmu-mir-202-3p | 7   | 147143594 | 147143615 | -      | edit | 8        | 0        | 0.0%  | 0         | 0.0%  | 0         | 0.0%   |
| mmu-mir-202-3p | 7   | 147143594 | 147143615 | -      | edit | 9        | 0        | 0.0%  | 0         | 0.0%  | 0         | 0.0%   |
| mmu-mir-202-3p | 7   | 147143594 | 147143615 | -      | edit | 10       | 0        | 0.0%  | 0         | 0.0%  | 0         | 0.0%   |
| mmu-mir-202-3p | 7   | 147143594 | 147143615 | -      | edit | 11       | 0        | 0.0%  | 0         | 0.0%  | 0         | 0.0%   |
| mmu-mir-202-3p | 7   | 147143594 | 147143615 | -      | edit | 12       | 0        | 0.0%  | 0         | 0.0%  | 0         | 0.0%   |
| mmu-mir-202-3p | 7   | 147143594 | 147143615 | -      | edit | 13       | 0        | 0.0%  | 0         | 0.0%  | 0         | 0.0%   |
| mmu-mir-202-3p | 7   | 147143594 | 147143615 | -      | edit | 14       | 0        | 0.0%  | 0         | 0.0%  | 0         | 0.0%   |
| mmu-mir-202-3p | 7   | 147143594 | 147143615 | -      | edit | 15       | 0        | 0.0%  | 0         | 0.0%  | 0         | 0.0%   |
| mmu-mir-202-3p | 7   | 147143594 | 147143615 | -      | edit | 16       | 0        | 0.0%  | 0         | 0.0%  | 0         | 0.0%   |
| mmu-mir-202-3p | 7   | 147143594 | 147143615 | -      | edit | 17       | 0        | 0.0%  | 0         | 0.0%  | 0         | 0.0%   |
| mmu-mir-202-3p | 7   | 147143594 | 147143615 | -      | edit | 18       | 0        | 0.0%  | 0         | 0.0%  | 0         | 0.0%   |
| mmu-mir-202-3p | 7   | 147143594 | 147143615 | -      | edit | 19       | 9        | 0.9%  | 21        | 3.8%  | 0         | 0.0%   |
| mmu-mir-202-3p | 7   | 147143594 | 147143615 | -      | edit | 20       | 0        | 0.0%  | 0         | 0.0%  | 0         | 0.0%   |
| mmu-mir-202-3p | 7   | 147143594 | 147143615 | -      | edit | 21       | 0        | 0.0%  | 0         | 0.0%  | 0         | 0.0%   |
| mmu-mir-202-3p | 7   | 147143594 | 147143615 | -      | edit | 22       | 0        | 0.0%  | 0         | 0.0%  | 0         | 0.0%   |
| EDITED         |     |           |           |        |      |          | 9        | 0.9%  | 21        | 3.8%  | 0         | 0.0%   |
| CANONICAL      |     |           |           |        |      |          | 985      | 99.1% | 539       | 96.3% | 227       | 100.0% |
| TOTAL          |     |           |           |        |      |          | 994      |       | 560       |       | 227       |        |

| miRNA          | Chr | Start     | Stop      | Strand | Type | Position | P7 reads | P7%   | P10 reads | P10%  | P14 reads | P14%  |
|----------------|-----|-----------|-----------|--------|------|----------|----------|-------|-----------|-------|-----------|-------|
| mmu-mir-202-5p | 7   | 147143631 | 147143651 | -      | edit | 1        | 0        | 0.0%  | 0         | 0.0%  | 0         | 0.0%  |
| mmu-mir-202-5p | 7   | 147143631 | 147143651 | -      | edit | 2        | 0        | 0.0%  | 0         | 0.0%  | 0         | 0.0%  |
| mmu-mir-202-5p | 7   | 147143631 | 147143651 | -      | edit | 3        | 0        | 0.0%  | 0         | 0.0%  | 0         | 0.0%  |
| mmu-mir-202-5p | 7   | 147143631 | 147143651 | -      | edit | 4        | 0        | 0.0%  | 0         | 0.0%  | 0         | 0.0%  |
| mmu-mir-202-5p | 7   | 147143631 | 147143651 | -      | edit | 5        | 0        | 0.0%  | 0         | 0.0%  | 0         | 0.0%  |
| mmu-mir-202-5p | 7   | 147143631 | 147143651 | -      | edit | 6        | 0        | 0.0%  | 0         | 0.0%  | 0         | 0.0%  |
| mmu-mir-202-5p | 7   | 147143631 | 147143651 | -      | edit | 7        | 0        | 0.0%  | 0         | 0.0%  | 0         | 0.0%  |
| mmu-mir-202-5p | 7   | 147143631 | 147143651 | -      | edit | 8        | 0        | 0.0%  | 0         | 0.0%  | 0         | 0.0%  |
| mmu-mir-202-5p | 7   | 147143631 | 147143651 | -      | edit | 9        | 0        | 0.0%  | 0         | 0.0%  | 0         | 0.0%  |
| mmu-mir-202-5p | 7   | 147143631 | 147143651 | -      | edit | 10       | 0        | 0.0%  | 0         | 0.0%  | 0         | 0.0%  |
| mmu-mir-202-5p | 7   | 147143631 | 147143651 | -      | edit | 11       | 0        | 0.0%  | 0         | 0.0%  | 0         | 0.0%  |
| mmu-mir-202-5p | 7   | 147143631 | 147143651 | -      | edit | 12       | 0        | 0.0%  | 0         | 0.0%  | 0         | 0.0%  |
| mmu-mir-202-5p | 7   | 147143631 | 147143651 | -      | edit | 13       | 0        | 0.0%  | 0         | 0.0%  | 0         | 0.0%  |
| mmu-mir-202-5p | 7   | 147143631 | 147143651 | -      | edit | 14       | 0        | 0.0%  | 0         | 0.0%  | 0         | 0.0%  |
| mmu-mir-202-5p | 7   | 147143631 | 147143651 | -      | edit | 15       | 0        | 0.0%  | 0         | 0.0%  | 0         | 0.0%  |
| mmu-mir-202-5p | 7   | 147143631 | 147143651 | -      | edit | 16       | 24       | 0.1%  | 15        | 0.0%  | 10        | 0.1%  |
| mmu-mir-202-5p | 7   | 147143631 | 147143651 | -      | edit | 17       | 0        | 0.0%  | 0         | 0.0%  | 0         | 0.0%  |
| mmu-mir-202-5p | 7   | 147143631 | 147143651 | -      | edit | 18       | 5        | 0.0%  | 4         | 0.0%  | 0         | 0.0%  |
| mmu-mir-202-5p | 7   | 147143631 | 147143651 | -      | edit | 19       | 0        | 0.0%  | 0         | 0.0%  | 0         | 0.0%  |
| mmu-mir-202-5p | 7   | 147143631 | 147143651 | -      | edit | 20       | 0        | 0.0%  | 0         | 0.0%  | 0         | 0.0%  |
| mmu-mir-202-5p | 7   | 147143631 | 147143651 | -      | edit | 21       | 0        | 0.0%  | 0         | 0.0%  | 0         | 0.0%  |
| mmu-mir-202-5p | 7   | 147143631 | 147143651 | -      | edit | 22       | 0        | 0.0%  | 0         | 0.0%  | 0         | 0.0%  |
| EDITED         |     |           |           |        |      |          | 29       | 0.1%  | 19        | 0.1%  | 10        | 0.1%  |
| CANONICAL      |     |           |           |        |      |          | 25730    | 99.9% | 30465     | 99.9% | 14298     | 99.9% |
| TOTAL          |     |           |           |        |      |          | 25759    |       | 30484     |       | 14308     |       |

| miRNA          | Chr | Start     | Stop      | Strand | Type | Position | P7 reads | P7%    | P10 reads | P10%  | P14 reads | P14%  |
|----------------|-----|-----------|-----------|--------|------|----------|----------|--------|-----------|-------|-----------|-------|
| mmu-mir-203-3p | 12  | 113369138 | 113369159 | +      | edit | 1        | 0        | 0.0%   | 0         | 0.0%  | 0         | 0.0%  |
| mmu-mir-203-3p | 12  | 113369138 | 113369159 | +      | edit | 2        | 0        | 0.0%   | 0         | 0.0%  | 0         | 0.0%  |
| mmu-mir-203-3p | 12  | 113369138 | 113369159 | +      | edit | 3        | 0        | 0.0%   | 0         | 0.0%  | 0         | 0.0%  |
| mmu-mir-203-3p | 12  | 113369138 | 113369159 | +      | edit | 4        | 0        | 0.0%   | 0         | 0.0%  | 0         | 0.0%  |
| mmu-mir-203-3p | 12  | 113369138 | 113369159 | +      | edit | 5        | 0        | 0.0%   | 0         | 0.0%  | 0         | 0.0%  |
| mmu-mir-203-3p | 12  | 113369138 | 113369159 | +      | edit | 6        | 0        | 0.0%   | 0         | 0.0%  | 0         | 0.0%  |
| mmu-mir-203-3p | 12  | 113369138 | 113369159 | +      | edit | 7        | 0        | 0.0%   | 0         | 0.0%  | 0         | 0.0%  |
| mmu-mir-203-3p | 12  | 113369138 | 113369159 | +      | edit | 8        | 0        | 0.0%   | 0         | 0.0%  | 0         | 0.0%  |
| mmu-mir-203-3p | 12  | 113369138 | 113369159 | +      | edit | 9        | 0        | 0.0%   | 0         | 0.0%  | 0         | 0.0%  |
| mmu-mir-203-3p | 12  | 113369138 | 113369159 | +      | edit | 10       | 0        | 0.0%   | 0         | 0.0%  | 0         | 0.0%  |
| mmu-mir-203-3p | 12  | 113369138 | 113369159 | +      | edit | 11       | 0        | 0.0%   | 0         | 0.0%  | 0         | 0.0%  |
| mmu-mir-203-3p | 12  | 113369138 | 113369159 | +      | edit | 12       | 0        | 0.0%   | 0         | 0.0%  | 0         | 0.0%  |
| mmu-mir-203-3p | 12  | 113369138 | 113369159 | +      | edit | 13       | 0        | 0.0%   | 0         | 0.0%  | 0         | 0.0%  |
| mmu-mir-203-3p | 12  | 113369138 | 113369159 | +      | edit | 14       | 0        | 0.0%   | 0         | 0.0%  | 0         | 0.0%  |
| mmu-mir-203-3p | 12  | 113369138 | 113369159 | +      | edit | 15       | 0        | 0.0%   | 0         | 0.0%  | 0         | 0.0%  |
| mmu-mir-203-3p | 12  | 113369138 | 113369159 | +      | edit | 16       | 0        | 0.0%   | 3         | 0.5%  | 7         | 1.2%  |
| mmu-mir-203-3p | 12  | 113369138 | 113369159 | +      | edit | 17       | 0        | 0.0%   | 0         | 0.0%  | 0         | 0.0%  |
| mmu-mir-203-3p | 12  | 113369138 | 113369159 | +      | edit | 18       | 0        | 0.0%   | 0         | 0.0%  | 0         | 0.0%  |
| mmu-mir-203-3p | 12  | 113369138 | 113369159 | +      | edit | 19       | 0        | 0.0%   | 6         | 0.9%  | 4         | 0.7%  |
| mmu-mir-203-3p | 12  | 113369138 | 113369159 | +      | edit | 20       | 0        | 0.0%   | 0         | 0.0%  | 0         | 0.0%  |
| mmu-mir-203-3p | 12  | 113369138 | 113369159 | +      | edit | 21       | 0        | 0.0%   | 0         | 0.0%  | 0         | 0.0%  |
| mmu-mir-203-3p | 12  | 113369138 | 113369159 | +      | edit | 22       | 0        | 0.0%   | 0         | 0.0%  | 0         | 0.0%  |
| EDITED         |     |           |           |        |      |          | 0        | 0.0%   | 9         | 1.4%  | 11        | 1.9%  |
| CANONICAL      |     |           |           |        |      |          | 509      | 100.0% | 651       | 98.6% | 546       | 98.1% |
| TOTAL          |     |           |           |        |      |          | 509      |        | 660       |       | 557       |       |



| miRNA          | Chr | Start     | Stop      | Strand | Type | Position | P7 reads | P7%   | P10 reads | P10%  | P14 reads | P14%  |
|----------------|-----|-----------|-----------|--------|------|----------|----------|-------|-----------|-------|-----------|-------|
| mmu-mir-210-5p | 7   | 148407306 | 148407327 | -      | edit | 1        | 0        | 0.0%  | 0         | 0.0%  | 0         | 0.0%  |
| mmu-mir-210-5p | 7   | 148407306 | 148407327 | -      | edit | 2        | 0        | 0.0%  | 0         | 0.0%  | 0         | 0.0%  |
| mmu-mir-210-5p | 7   | 148407306 | 148407327 | -      | edit | 3        | 0        | 0.0%  | 0         | 0.0%  | 0         | 0.0%  |
| mmu-mir-210-5p | 7   | 148407306 | 148407327 | -      | edit | 4        | 0        | 0.0%  | 0         | 0.0%  | 0         | 0.0%  |
| mmu-mir-210-5p | 7   | 148407306 | 148407327 | -      | edit | 5        | 0        | 0.0%  | 0         | 0.0%  | 0         | 0.0%  |
| mmu-mir-210-5p | 7   | 148407306 | 148407327 | -      | edit | 6        | 0        | 0.0%  | 0         | 0.0%  | 0         | 0.0%  |
| mmu-mir-210-5p | 7   | 148407306 | 148407327 | -      | edit | 7        | 0        | 0.0%  | 0         | 0.0%  | 0         | 0.0%  |
| mmu-mir-210-5p | 7   | 148407306 | 148407327 | -      | edit | 8        | 0        | 0.0%  | 0         | 0.0%  | 0         | 0.0%  |
| mmu-mir-210-5p | 7   | 148407306 | 148407327 | -      | edit | 9        | 0        | 0.0%  | 0         | 0.0%  | 0         | 0.0%  |
| mmu-mir-210-5p | 7   | 148407306 | 148407327 | -      | edit | 10       | 0        | 0.0%  | 0         | 0.0%  | 0         | 0.0%  |
| mmu-mir-210-5p | 7   | 148407306 | 148407327 | -      | edit | 11       | 0        | 0.0%  | 0         | 0.0%  | 0         | 0.0%  |
| mmu-mir-210-5p | 7   | 148407306 | 148407327 | -      | edit | 12       | 0        | 0.0%  | 0         | 0.0%  | 0         | 0.0%  |
| mmu-mir-210-5p | 7   | 148407306 | 148407327 | -      | edit | 13       | 0        | 0.0%  | 0         | 0.0%  | 0         | 0.0%  |
| mmu-mir-210-5p | 7   | 148407306 | 148407327 | -      | edit | 14       | 0        | 0.0%  | 0         | 0.0%  | 0         | 0.0%  |
| mmu-mir-210-5p | 7   | 148407306 | 148407327 | -      | edit | 15       | 0        | 0.0%  | 0         | 0.0%  | 0         | 0.0%  |
| mmu-mir-210-5p | 7   | 148407306 | 148407327 | -      | edit | 16       | 0        | 0.0%  | 0         | 0.0%  | 0         | 0.0%  |
| mmu-mir-210-5p | 7   | 148407306 | 148407327 | -      | edit | 17       | 0        | 0.0%  | 0         | 0.0%  | 0         | 0.0%  |
| mmu-mir-210-5p | 7   | 148407306 | 148407327 | -      | edit | 18       | 0        | 0.0%  | 0         | 0.0%  | 0         | 0.0%  |
| mmu-mir-210-5p | 7   | 148407306 | 148407327 | -      | edit | 19       | 12       | 1.4%  | 11        | 2.7%  | 7         | 4.0%  |
| mmu-mir-210-5p | 7   | 148407306 | 148407327 | -      | edit | 20       | 0        | 0.0%  | 0         | 0.0%  | 0         | 0.0%  |
| mmu-mir-210-5p | 7   | 148407306 | 148407327 | -      | edit | 21       | 0        | 0.0%  | 0         | 0.0%  | 0         | 0.0%  |
| mmu-mir-210-5p | 7   | 148407306 | 148407327 | -      | edit | 22       | 0        | 0.0%  | 0         | 0.0%  | 0         | 0.0%  |
| EDITED         |     |           |           |        |      |          | 12       | 1.4%  | 11        | 2.7%  | 7         | 4.0%  |
| CANONICAL      |     |           |           |        |      |          | 874      | 98.6% | 397       | 97.3% | 158       | 96.0% |
| TOTAL          |     |           |           |        |      |          | 886      |       | 408       |       | 165       |       |

| miRNA          | Chr | Start    | Stop     | Strand | Type | Position | P7 reads | P7%   | P10 reads | P10%  | P14 reads | P14%  |
|----------------|-----|----------|----------|--------|------|----------|----------|-------|-----------|-------|-----------|-------|
| mmu-mir-221-5p | X   | 18723433 | 18723455 | -      | edit | 2        | 0        | 0.0%  | 0         | 0.0%  | 0         | 0.0%  |
| mmu-mir-221-5p | X   | 18723433 | 18723455 | -      | edit | 3        | 0        | 0.0%  | 0         | 0.0%  | 0         | 0.0%  |
| mmu-mir-221-5p | X   | 18723433 | 18723455 | -      | edit | 4        | 0        | 0.0%  | 0         | 0.0%  | 0         | 0.0%  |
| mmu-mir-221-5p | X   | 18723433 | 18723455 | -      | edit | 5        | 0        | 0.0%  | 0         | 0.0%  | 0         | 0.0%  |
| mmu-mir-221-5p | X   | 18723433 | 18723455 | -      | edit | 6        | 0        | 0.0%  | 0         | 0.0%  | 0         | 0.0%  |
| mmu-mir-221-5p | X   | 18723433 | 18723455 | -      | edit | 7        | 0        | 0.0%  | 0         | 0.0%  | 0         | 0.0%  |
| mmu-mir-221-5p | X   | 18723433 | 18723455 | -      | edit | 8        | 0        | 0.0%  | 0         | 0.0%  | 0         | 0.0%  |
| mmu-mir-221-5p | X   | 18723433 | 18723455 | -      | edit | 9        | 0        | 0.0%  | 0         | 0.0%  | 0         | 0.0%  |
| mmu-mir-221-5p | X   | 18723433 | 18723455 | -      | edit | 10       | 0        | 0.0%  | 0         | 0.0%  | 0         | 0.0%  |
| mmu-mir-221-5p | X   | 18723433 | 18723455 | -      | edit | 11       | 0        | 0.0%  | 0         | 0.0%  | 0         | 0.0%  |
| mmu-mir-221-5p | X   | 18723433 | 18723455 | -      | edit | 12       | 0        | 0.0%  | 0         | 0.0%  | 0         | 0.0%  |
| mmu-mir-221-5p | X   | 18723433 | 18723455 | -      | edit | 13       | 0        | 0.0%  | 0         | 0.0%  | 0         | 0.0%  |
| mmu-mir-221-5p | X   | 18723433 | 18723455 | -      | edit | 14       | 0        | 0.0%  | 0         | 0.0%  | 0         | 0.0%  |
| mmu-mir-221-5p | X   | 18723433 | 18723455 | -      | edit | 15       | 9        | 0.4%  | 3         | 0.6%  | 5         | 1.1%  |
| mmu-mir-221-5p | X   | 18723433 | 18723455 | -      | edit | 16       | 3        | 0.1%  | 0         | 0.0%  | 0         | 0.0%  |
| mmu-mir-221-5p | X   | 18723433 | 18723455 | -      | edit | 17       | 0        | 0.0%  | 0         | 0.0%  | 0         | 0.0%  |
| mmu-mir-221-5p | X   | 18723433 | 18723455 | -      | edit | 18       | 0        | 0.0%  | 0         | 0.0%  | 0         | 0.0%  |
| mmu-mir-221-5p | X   | 18723433 | 18723455 | -      | edit | 19       | 5        | 0.2%  | 0         | 0.0%  | 0         | 0.0%  |
| mmu-mir-221-5p | X   | 18723433 | 18723455 | -      | edit | 20       | 25       | 1.2%  | 3         | 0.5%  | 0         | 0.0%  |
| mmu-mir-221-5p | X   | 18723433 | 18723455 | -      | edit | 21       | 0        | 0.0%  | 0         | 0.0%  | 0         | 0.0%  |
| mmu-mir-221-5p | X   | 18723433 | 18723455 | -      | edit | 22       | 0        | 0.0%  | 0         | 0.0%  | 0         | 0.0%  |
| EDITED         |     |          |          |        |      |          | 42       | 2.1%  | 6         | 1.1%  | 5         | 1.1%  |
| CANONICAL      |     |          |          |        |      |          | 1998     | 97.9% | 552       | 98.9% | 461       | 98.9% |
| TOTAL          |     |          |          |        |      |          | 2040     |       | 558       |       | 466       |       |

| miRNA          | Chr | Start    | Stop     | Strand | Type | Position | P7 reads | P7%   | P10 reads | P10%   | P14 reads | P14%   |
|----------------|-----|----------|----------|--------|------|----------|----------|-------|-----------|--------|-----------|--------|
| mmu-mir-222-5p | X   | 18724029 | 18724049 | -      | edit | 1        | 0        | 0.0%  | 0         | 0.0%   | 0         | 0.0%   |
| mmu-mir-222-5p | X   | 18724029 | 18724049 | -      | edit | 2        | 0        | 0.0%  | 0         | 0.0%   | 0         | 0.0%   |
| mmu-mir-222-5p | X   | 18724029 | 18724049 | -      | edit | 3        | 0        | 0.0%  | 0         | 0.0%   | 0         | 0.0%   |
| mmu-mir-222-5p | X   | 18724029 | 18724049 | -      | edit | 4        | 0        | 0.0%  | 0         | 0.0%   | 0         | 0.0%   |
| mmu-mir-222-5p | X   | 18724029 | 18724049 | -      | edit | 5        | 0        | 0.0%  | 0         | 0.0%   | 0         | 0.0%   |
| mmu-mir-222-5p | X   | 18724029 | 18724049 | -      | edit | 6        | 0        | 0.0%  | 0         | 0.0%   | 0         | 0.0%   |
| mmu-mir-222-5p | X   | 18724029 | 18724049 | -      | edit | 7        | 0        | 0.0%  | 0         | 0.0%   | 0         | 0.0%   |
| mmu-mir-222-5p | X   | 18724029 | 18724049 | -      | edit | 8        | 0        | 0.0%  | 0         | 0.0%   | 0         | 0.0%   |
| mmu-mir-222-5p | X   | 18724029 | 18724049 | -      | edit | 9        | 0        | 0.0%  | 0         | 0.0%   | 0         | 0.0%   |
| mmu-mir-222-5p | X   | 18724029 | 18724049 | -      | edit | 10       | 0        | 0.0%  | 0         | 0.0%   | 0         | 0.0%   |
| mmu-mir-222-5p | X   | 18724029 | 18724049 | -      | edit | 11       | 0        | 0.0%  | 0         | 0.0%   | 0         | 0.0%   |
| mmu-mir-222-5p | X   | 18724029 | 18724049 | -      | edit | 12       | 0        | 0.0%  | 0         | 0.0%   | 0         | 0.0%   |
| mmu-mir-222-5p | X   | 18724029 | 18724049 | -      | edit | 13       | 0        | 0.0%  | 0         | 0.0%   | 0         | 0.0%   |
| mmu-mir-222-5p | X   | 18724029 | 18724049 | -      | edit | 14       | 0        | 0.0%  | 0         | 0.0%   | 0         | 0.0%   |
| mmu-mir-222-5p | X   | 18724029 | 18724049 | -      | edit | 15       | 0        | 0.0%  | 0         | 0.0%   | 0         | 0.0%   |
| mmu-mir-222-5p | X   | 18724029 | 18724049 | -      | edit | 16       | 0        | 0.0%  | 0         | 0.0%   | 0         | 0.0%   |
| mmu-mir-222-5p | X   | 18724029 | 18724049 | -      | edit | 17       | 0        | 0.0%  | 0         | 0.0%   | 0         | 0.0%   |
| mmu-mir-222-5p | X   | 18724029 | 18724049 | -      | edit | 18       | 0        | 0.0%  | 0         | 0.0%   | 0         | 0.0%   |
| mmu-mir-222-5p | X   | 18724029 | 18724049 | -      | edit | 19       | 0        | 0.0%  | 0         | 0.0%   | 0         | 0.0%   |
| mmu-mir-222-5p | X   | 18724029 | 18724049 | -      | edit | 20       | 0        | 0.0%  | 0         | 0.0%   | 0         | 0.0%   |
| mmu-mir-222-5p | X   | 18724029 | 18724049 | -      | edit | 21       | 7        | 1.9%  | 0         | 0.0%   | 0         | 0.0%   |
| mmu-mir-222-5p | X   | 18724029 | 18724049 | -      | edit | 22       | 0        | 0.0%  | 0         | 0.0%   | 0         | 0.0%   |
| EDITED         |     |          |          |        |      |          | 7        | 1.9%  | 0         | 0.0%   | 0         | 0.0%   |
| CANONICAL      |     |          |          |        |      |          | 364      | 98.1% | 125       | 100.0% | 70        | 100.0% |
| TOTAL          |     |          |          |        |      |          | 371      |       | 125       |        | 70        |        |

| miRNA          | Chr | Start     | Stop      | Strand | Type | Position | P7 reads | P7%   | P10 reads | P10%   | P14 reads | P14%   |
|----------------|-----|-----------|-----------|--------|------|----------|----------|-------|-----------|--------|-----------|--------|
| mmu-mir-296-5p | 2   | 174092594 | 174092614 | -      | edit | 1        | 0        | 0.0%  | 0         | 0.0%   | 0         | 0.0%   |
| mmu-mir-296-5p | 2   | 174092594 | 174092614 | -      | edit | 2        | 0        | 0.0%  | 0         | 0.0%   | 0         | 0.0%   |
| mmu-mir-296-5p | 2   | 174092594 | 174092614 | -      | edit | 3        | 0        | 0.0%  | 0         | 0.0%   | 0         | 0.0%   |
| mmu-mir-296-5p | 2   | 174092594 | 174092614 | -      | edit | 4        | 0        | 0.0%  | 0         | 0.0%   | 0         | 0.0%   |
| mmu-mir-296-5p | 2   | 174092594 | 174092614 | -      | edit | 5        | 0        | 0.0%  | 0         | 0.0%   | 0         | 0.0%   |
| mmu-mir-296-5p | 2   | 174092594 | 174092614 | -      | edit | 6        | 0        | 0.0%  | 0         | 0.0%   | 0         | 0.0%   |
| mmu-mir-296-5p | 2   | 174092594 | 174092614 | -      | edit | 7        | 0        | 0.0%  | 0         | 0.0%   | 0         | 0.0%   |
| mmu-mir-296-5p | 2   | 174092594 | 174092614 | -      | edit | 8        | 0        | 0.0%  | 0         | 0.0%   | 0         | 0.0%   |
| mmu-mir-296-5p | 2   | 174092594 | 174092614 | -      | edit | 9        | 0        | 0.0%  | 0         | 0.0%   | 0         | 0.0%   |
| mmu-mir-296-5p | 2   | 174092594 | 174092614 | -      | edit | 10       | 0        | 0.0%  | 0         | 0.0%   | 0         | 0.0%   |
| mmu-mir-296-5p | 2   | 174092594 | 174092614 | -      | edit | 11       | 0        | 0.0%  | 0         | 0.0%   | 0         | 0.0%   |
| mmu-mir-296-5p | 2   | 174092594 | 174092614 | -      | edit | 12       | 0        | 0.0%  | 0         | 0.0%   | 0         | 0.0%   |
| mmu-mir-296-5p | 2   | 174092594 | 174092614 | -      | edit | 13       | 0        | 0.0%  | 0         | 0.0%   | 0         | 0.0%   |
| mmu-mir-296-5p | 2   | 174092594 | 174092614 | -      | edit | 14       | 0        | 0.0%  | 0         | 0.0%   | 0         | 0.0%   |
| mmu-mir-296-5p | 2   | 174092594 | 174092614 | -      | edit | 15       | 0        | 0.0%  | 0         | 0.0%   | 0         | 0.0%   |
| mmu-mir-296-5p | 2   | 174092594 | 174092614 | -      | edit | 16       | 0        | 0.0%  | 0         | 0.0%   | 0         | 0.0%   |
| mmu-mir-296-5p | 2   | 174092594 | 174092614 | -      | edit | 17       | 0        | 0.0%  | 0         | 0.0%   | 0         | 0.0%   |
| mmu-mir-296-5p | 2   | 174092594 | 174092614 | -      | edit | 18       | 0        | 0.0%  | 0         | 0.0%   | 0         | 0.0%   |
| mmu-mir-296-5p | 2   | 174092594 | 174092614 | -      | edit | 19       | 4        | 0.9%  | 0         | 0.0%   | 0         | 0.0%   |
| mmu-mir-296-5p | 2   | 174092594 | 174092614 | -      | edit | 20       | 0        | 0.0%  | 0         | 0.0%   | 0         | 0.0%   |
| mmu-mir-296-5p | 2   | 174092594 | 174092614 | -      | edit | 21       | 0        | 0.0%  | 0         | 0.0%   | 0         | 0.0%   |
| mmu-mir-296-5p | 2   | 174092594 | 174092614 | -      | edit | 22       | 0        | 0.0%  | 0         | 0.0%   | 0         | 0.0%   |
| EDITED         |     |           |           |        |      |          | 4        | 0.9%  | 0         | 0.0%   | 0         | 0.0%   |
| CANONICAL      |     |           |           |        |      |          | 381      | 99.1% | 136       | 100.0% | 107       | 100.0% |
| TOTAL          |     |           |           |        |      |          | 385      |       | 136       |        | 107       |        |

| miRNA          | Chr | Start     | Stop      | Strand | Type  | Position | P7 reads | P7%   | P10 reads | P10%  | P14 reads | P14%  |
|----------------|-----|-----------|-----------|--------|-------|----------|----------|-------|-----------|-------|-----------|-------|
| mmu-mir-298-5p | 2   | 174093054 | 174093076 | -      | Indel | 22       | 0        | 0.0%  | 4         | 0.1%  | 0         | 0.0%  |
| mmu-mir-298-5p | 2   | 174093054 | 174093076 | -      | edit  | 1        | 0        | 0.0%  | 0         | 0.0%  | 0         | 0.0%  |
| mmu-mir-298-5p | 2   | 174093054 | 174093076 | -      | edit  | 2        | 0        | 0.0%  | 0         | 0.0%  | 0         | 0.0%  |
| mmu-mir-298-5p | 2   | 174093054 | 174093076 | -      | edit  | 3        | 0        | 0.0%  | 0         | 0.0%  | 0         | 0.0%  |
| mmu-mir-298-5p | 2   | 174093054 | 174093076 | -      | edit  | 4        | 0        | 0.0%  | 0         | 0.0%  | 0         | 0.0%  |
| mmu-mir-298-5p | 2   | 174093054 | 174093076 | -      | edit  | 5        | 0        | 0.0%  | 0         | 0.0%  | 0         | 0.0%  |
| mmu-mir-298-5p | 2   | 174093054 | 174093076 | -      | edit  | 6        | 0        | 0.0%  | 0         | 0.0%  | 0         | 0.0%  |
| mmu-mir-298-5p | 2   | 174093054 | 174093076 | -      | edit  | 7        | 0        | 0.0%  | 0         | 0.0%  | 0         | 0.0%  |
| mmu-mir-298-5p | 2   | 174093054 | 174093076 | -      | edit  | 8        | 0        | 0.0%  | 0         | 0.0%  | 0         | 0.0%  |
| mmu-mir-298-5p | 2   | 174093054 | 174093076 | -      | edit  | 9        | 0        | 0.0%  | 0         | 0.0%  | 0         | 0.0%  |
| mmu-mir-298-5p | 2   | 174093054 | 174093076 | -      | edit  | 10       | 0        | 0.0%  | 0         | 0.0%  | 0         | 0.0%  |
| mmu-mir-298-5p | 2   | 174093054 | 174093076 | -      | edit  | 11       | 0        | 0.0%  | 0         | 0.0%  | 0         | 0.0%  |
| mmu-mir-298-5p | 2   | 174093054 | 174093076 | -      | edit  | 12       | 0        | 0.0%  | 0         | 0.0%  | 0         | 0.0%  |
| mmu-mir-298-5p | 2   | 174093054 | 174093076 | -      | edit  | 13       | 6        | 0.1%  | 12        | 0.2%  | 18        | 0.4%  |
| mmu-mir-298-5p | 2   | 174093054 | 174093076 | -      | edit  | 14       | 0        | 0.0%  | 0         | 0.0%  | 0         | 0.0%  |
| mmu-mir-298-5p | 2   | 174093054 | 174093076 | -      | edit  | 15       | 0        | 0.0%  | 0         | 0.0%  | 4         | 0.1%  |
| mmu-mir-298-5p | 2   | 174093054 | 174093076 | -      | edit  | 16       | 28       | 0.2%  | 11        | 0.2%  | 15        | 0.3%  |
| mmu-mir-298-5p | 2   | 174093054 | 174093076 | -      | edit  | 17       | 6        | 0.1%  | 0         | 0.0%  | 0         | 0.0%  |
| mmu-mir-298-5p | 2   | 174093054 | 174093076 | -      | edit  | 18       | 9        | 0.1%  | 0         | 0.0%  | 5         | 0.1%  |
| mmu-mir-298-5p | 2   | 174093054 | 174093076 | -      | edit  | 19       | 7        | 0.1%  | 7         | 0.1%  | 6         | 0.1%  |
| mmu-mir-298-5p | 2   | 174093054 | 174093076 | -      | edit  | 20       | 4        | 0.0%  | 0         | 0.0%  | 0         | 0.0%  |
| mmu-mir-298-5p | 2   | 174093054 | 174093076 | -      | edit  | 21       | 16       | 0.1%  | 6         | 0.1%  | 12        | 0.2%  |
| mmu-mir-298-5p | 2   | 174093054 | 174093076 | -      | edit  | 22       | 23       | 0.2%  | 11        | 0.2%  | 20        | 0.4%  |
| EDITED         |     |           |           |        |       |          | 98       | 0.8%  | 50        | 0.9%  | 79        | 1.7%  |
| CANONICAL      |     |           |           |        |       |          | 11498    | 99.2% | 5248      | 99.1% | 4534      | 98.3% |
| TOTAL          |     |           |           |        |       |          | 11596    |       | 5298      |       | 4613      |       |

| miRNA          | Chr | Start    | Stop     | Strand | Type     | Position | P7 reads | P7%   | P10 reads | P10%  | P14 reads | P14%  |
|----------------|-----|----------|----------|--------|----------|----------|----------|-------|-----------|-------|-----------|-------|
| mmu-mir-320-5p | 14  | 70843364 | 70843385 | +      | 3' Edit  | 3'       | 35       | 0.1%  | 0         | 0.0%  | 10        | 0.1%  |
| mmu-mir-320-5p | 14  | 70843364 | 70843385 | +      | 3' Indel | 3'       | 16       | 0.0%  | 0         | 0.0%  | 5         | 0.0%  |
| mmu-mir-320-5p | 14  | 70843364 | 70843385 | +      | Indel    | 22       | 12       | 0.0%  | 0         | 0.0%  | 6         | 0.1%  |
| mmu-mir-320-5p | 14  | 70843364 | 70843385 | +      | edit     | 1        | 0        | 0.0%  | 0         | 0.0%  | 0         | 0.0%  |
| mmu-mir-320-5p | 14  | 70843364 | 70843385 | +      | edit     | 2        | 0        | 0.0%  | 0         | 0.0%  | 0         | 0.0%  |
| mmu-mir-320-5p | 14  | 70843364 | 70843385 | +      | edit     | 3        | 0        | 0.0%  | 0         | 0.0%  | 0         | 0.0%  |
| mmu-mir-320-5p | 14  | 70843364 | 70843385 | +      | edit     | 4        | 15       | 0.0%  | 12        | 0.1%  | 0         | 0.0%  |
| mmu-mir-320-5p | 14  | 70843364 | 70843385 | +      | edit     | 5        | 0        | 0.0%  | 0         | 0.0%  | 0         | 0.0%  |
| mmu-mir-320-5p | 14  | 70843364 | 70843385 | +      | edit     | 6        | 46       | 0.1%  | 14        | 0.1%  | 16        | 0.2%  |
| mmu-mir-320-5p | 14  | 70843364 | 70843385 | +      | edit     | 7        | 0        | 0.0%  | 0         | 0.0%  | 0         | 0.0%  |
| mmu-mir-320-5p | 14  | 70843364 | 70843385 | +      | edit     | 8        | 38       | 0.1%  | 15        | 0.1%  | 0         | 0.0%  |
| mmu-mir-320-5p | 14  | 70843364 | 70843385 | +      | edit     | 9        | 0        | 0.0%  | 0         | 0.0%  | 0         | 0.0%  |
| mmu-mir-320-5p | 14  | 70843364 | 70843385 | +      | edit     | 10       | 0        | 0.0%  | 0         | 0.0%  | 0         | 0.0%  |
| mmu-mir-320-5p | 14  | 70843364 | 70843385 | +      | edit     | 11       | 0        | 0.0%  | 0         | 0.0%  | 0         | 0.0%  |
| mmu-mir-320-5p | 14  | 70843364 | 70843385 | +      | edit     | 12       | 0        | 0.0%  | 0         | 0.0%  | 0         | 0.0%  |
| mmu-mir-320-5p | 14  | 70843364 | 70843385 | +      | edit     | 13       | 0        | 0.0%  | 0         | 0.0%  | 0         | 0.0%  |
| mmu-mir-320-5p | 14  | 70843364 | 70843385 | +      | edit     | 14       | 3        | 0.0%  | 0         | 0.0%  | 0         | 0.0%  |
| mmu-mir-320-5p | 14  | 70843364 | 70843385 | +      | edit     | 15       | 129      | 0.3%  | 49        | 0.2%  | 26        | 0.2%  |
| mmu-mir-320-5p | 14  | 70843364 | 70843385 | +      | edit     | 16       | 4        | 0.0%  | 9         | 0.0%  | 0         | 0.0%  |
| mmu-mir-320-5p | 14  | 70843364 | 70843385 | +      | edit     | 17       | 8        | 0.0%  | 3         | 0.0%  | 0         | 0.0%  |
| mmu-mir-320-5p | 14  | 70843364 | 70843385 | +      | edit     | 18       | 5        | 0.0%  | 0         | 0.0%  | 0         | 0.0%  |
| mmu-mir-320-5p | 14  | 70843364 | 70843385 | +      | edit     | 19       | 306      | 0.6%  | 65        | 0.3%  | 67        | 0.6%  |
| mmu-mir-320-5p | 14  | 70843364 | 70843385 | +      | edit     | 20       | 94       | 0.2%  | 40        | 0.2%  | 34        | 0.3%  |
| mmu-mir-320-5p | 14  | 70843364 | 70843385 | +      | edit     | 21       | 23       | 0.0%  | 4         | 0.0%  | 5         | 0.0%  |
| mmu-mir-320-5p | 14  | 70843364 | 70843385 | +      | edit     | 22       | 30       | 0.1%  | 7         | 0.0%  | 11        | 0.1%  |
| EDITED         |     |          |          |        |          |          | 762      | 1.5%  | 218       | 1.0%  | 179       | 1.7%  |
| CANONICAL      |     |          |          |        |          |          | 48550    | 98.5% | 20699     | 99.0% | 10643     | 98.3% |
| TOTAL          |     |          |          |        |          |          | 49312    |       | 20917     |       | 10822     |       |

| miRNA          | Chr | Start    | Stop     | Strand | Type    | Position | P7 reads  | P7%         | P10 reads | P10%        | P14 reads | P14%        |
|----------------|-----|----------|----------|--------|---------|----------|-----------|-------------|-----------|-------------|-----------|-------------|
| mmu-mir-322-5p | X   | 50407446 | 50407466 | -      | 5' Edit | 5'       | 19        | 2.2%        | 0         | 0.0%        | 0         | 0.0%        |
| mmu-mir-322-5p | X   | 50407483 | 50407504 | -      | edit    | 1        | 0         | 0.0%        | 0         | 0.0%        | 0         | 0.0%        |
| mmu-mir-322-5p | X   | 50407483 | 50407504 | -      | edit    | 2        | 0         | 0.0%        | 0         | 0.0%        | 0         | 0.0%        |
| mmu-mir-322-5p | X   | 50407483 | 50407504 | -      | edit    | 3        | 0         | 0.0%        | 0         | 0.0%        | 0         | 0.0%        |
| mmu-mir-322-5p | X   | 50407483 | 50407504 | -      | edit    | 4        | 0         | 0.0%        | 0         | 0.0%        | 0         | 0.0%        |
| mmu-mir-322-5p | X   | 50407483 | 50407504 | -      | edit    | 5        | 0         | 0.0%        | 0         | 0.0%        | 0         | 0.0%        |
| mmu-mir-322-5p | X   | 50407483 | 50407504 | -      | edit    | 6        | 21        | 2.4%        | 0         | 0.0%        | 6         | 2.3%        |
| mmu-mir-322-5p | X   | 50407483 | 50407504 | -      | edit    | 7        | 3         | 0.4%        | 0         | 0.0%        | 0         | 0.0%        |
| mmu-mir-322-5p | X   | 50407483 | 50407504 | -      | edit    | 8        | 0         | 0.0%        | 0         | 0.0%        | 0         | 0.0%        |
| mmu-mir-322-5p | X   | 50407483 | 50407504 | -      | edit    | 9        | 0         | 0.0%        | 0         | 0.0%        | 0         | 0.0%        |
| mmu-mir-322-5p | X   | 50407483 | 50407504 | -      | edit    | 10       | 0         | 0.0%        | 0         | 0.0%        | 0         | 0.0%        |
| mmu-mir-322-5p | X   | 50407483 | 50407504 | -      | edit    | 11       | 0         | 0.0%        | 0         | 0.0%        | 0         | 0.0%        |
| mmu-mir-322-5p | X   | 50407483 | 50407504 | -      | edit    | 12       | 0         | 0.0%        | 0         | 0.0%        | 0         | 0.0%        |
| mmu-mir-322-5p | X   | 50407483 | 50407504 | -      | edit    | 13       | 20        | 2.3%        | 6         | 1.3%        | 5         | 2.0%        |
| mmu-mir-322-5p | X   | 50407483 | 50407504 | -      | edit    | 14       | 19        | 2.2%        | 3         | 0.7%        | 5         | 2.0%        |
| mmu-mir-322-5p | X   | 50407483 | 50407504 | -      | edit    | 15       | 21        | 2.4%        | 3         | 0.7%        | 0         | 0.0%        |
| mmu-mir-322-5p | X   | 50407483 | 50407504 | -      | edit    | 16       | 34        | 4.0%        | 10        | 2.3%        | 9         | 3.5%        |
| mmu-mir-322-5p | X   | 50407483 | 50407504 | -      | edit    | 17       | <b>32</b> | <b>3.7%</b> | <b>36</b> | <b>8.3%</b> | <b>8</b>  | <b>3.1%</b> |
| mmu-mir-322-5p | X   | 50407483 | 50407504 | -      | edit    | 18       | 4         | 0.5%        | 0         | 0.0%        | 0         | 0.0%        |
| mmu-mir-322-5p | X   | 50407483 | 50407504 | -      | edit    | 19       | 0         | 0.0%        | 0         | 0.0%        | 0         | 0.0%        |
| mmu-mir-322-5p | X   | 50407483 | 50407504 | -      | edit    | 20       | 0         | 0.0%        | 0         | 0.0%        | 0         | 0.0%        |
| mmu-mir-322-5p | X   | 50407483 | 50407504 | -      | edit    | 21       | 5         | 0.6%        | 0         | 0.0%        | 0         | 0.0%        |
| mmu-mir-322-5p | X   | 50407483 | 50407504 | -      | edit    | 22       | 0         | 0.0%        | 0         | 0.0%        | 0         | 0.0%        |
| EDITED         |     |          |          |        |         |          | 158       | 18.4%       | 58        | 13.2%       | 33        | 12.9%       |
| CANONICAL      |     |          |          |        |         |          | 699       | 81.6%       | 378       | 86.8%       | 223       | 87.1%       |
| TOTAL          |     |          |          |        |         |          | 857       |             | 436       |             | 256       |             |

| miRNA          | Chr | Start     | Stop      | Strand | Type | Position | P7 reads | P7%   | P10 reads | P10%   | P14 reads | P14%   |
|----------------|-----|-----------|-----------|--------|------|----------|----------|-------|-----------|--------|-----------|--------|
| mmu-mir-323-3p | 12  | 110950768 | 110950788 | +      | edit | 1        | 0        | 0.0%  | 0         | 0.0%   | 0         | 0.0%   |
| mmu-mir-323-3p | 12  | 110950768 | 110950788 | +      | edit | 2        | 0        | 0.0%  | 0         | 0.0%   | 0         | 0.0%   |
| mmu-mir-323-3p | 12  | 110950768 | 110950788 | +      | edit | 3        | 0        | 0.0%  | 0         | 0.0%   | 0         | 0.0%   |
| mmu-mir-323-3p | 12  | 110950768 | 110950788 | +      | edit | 4        | 0        | 0.0%  | 0         | 0.0%   | 0         | 0.0%   |
| mmu-mir-323-3p | 12  | 110950768 | 110950788 | +      | edit | 5        | 0        | 0.0%  | 0         | 0.0%   | 0         | 0.0%   |
| mmu-mir-323-3p | 12  | 110950768 | 110950788 | +      | edit | 6        | 0        | 0.0%  | 0         | 0.0%   | 0         | 0.0%   |
| mmu-mir-323-3p | 12  | 110950768 | 110950788 | +      | edit | 7        | 0        | 0.0%  | 0         | 0.0%   | 0         | 0.0%   |
| mmu-mir-323-3p | 12  | 110950768 | 110950788 | +      | edit | 8        | 0        | 0.0%  | 0         | 0.0%   | 0         | 0.0%   |
| mmu-mir-323-3p | 12  | 110950768 | 110950788 | +      | edit | 9        | 0        | 0.0%  | 0         | 0.0%   | 0         | 0.0%   |
| mmu-mir-323-3p | 12  | 110950768 | 110950788 | +      | edit | 10       | 0        | 0.0%  | 0         | 0.0%   | 0         | 0.0%   |
| mmu-mir-323-3p | 12  | 110950768 | 110950788 | +      | edit | 11       | 0        | 0.0%  | 0         | 0.0%   | 0         | 0.0%   |
| mmu-mir-323-3p | 12  | 110950768 | 110950788 | +      | edit | 12       | 0        | 0.0%  | 0         | 0.0%   | 0         | 0.0%   |
| mmu-mir-323-3p | 12  | 110950768 | 110950788 | +      | edit | 13       | 0        | 0.0%  | 0         | 0.0%   | 0         | 0.0%   |
| mmu-mir-323-3p | 12  | 110950768 | 110950788 | +      | edit | 14       | 4        | 0.9%  | 0         | 0.0%   | 0         | 0.0%   |
| mmu-mir-323-3p | 12  | 110950768 | 110950788 | +      | edit | 15       | 0        | 0.0%  | 0         | 0.0%   | 0         | 0.0%   |
| mmu-mir-323-3p | 12  | 110950768 | 110950788 | +      | edit | 16       | 0        | 0.0%  | 0         | 0.0%   | 0         | 0.0%   |
| mmu-mir-323-3p | 12  | 110950768 | 110950788 | +      | edit | 17       | 0        | 0.0%  | 0         | 0.0%   | 0         | 0.0%   |
| mmu-mir-323-3p | 12  | 110950768 | 110950788 | +      | edit | 18       | 6        | 1.4%  | 0         | 0.0%   | 0         | 0.0%   |
| mmu-mir-323-3p | 12  | 110950768 | 110950788 | +      | edit | 19       | 0        | 0.0%  | 0         | 0.0%   | 0         | 0.0%   |
| mmu-mir-323-3p | 12  | 110950768 | 110950788 | +      | edit | 20       | 0        | 0.0%  | 0         | 0.0%   | 0         | 0.0%   |
| mmu-mir-323-3p | 12  | 110950768 | 110950788 | +      | edit | 21       | 0        | 0.0%  | 0         | 0.0%   | 0         | 0.0%   |
| mmu-mir-323-3p | 12  | 110950768 | 110950788 | +      | edit | 22       | 0        | 0.0%  | 0         | 0.0%   | 0         | 0.0%   |
| EDITED         |     |           |           |        |      |          | 10       | 2.3%  | 0         | 0.0%   | 0         | 0.0%   |
| CANONICAL      |     |           |           |        |      |          | 422      | 97.7% | 99        | 100.0% | 37        | 100.0% |
| TOTAL          |     |           |           |        |      |          | 432      |       | 99        |        | 37        |        |



| miRNA          | Chr | Start     | Stop      | Strand | Type | Position | P7 reads | P7%    | P10 reads | P10%  | P14 reads | P14%   |
|----------------|-----|-----------|-----------|--------|------|----------|----------|--------|-----------|-------|-----------|--------|
| mmu-mir-328-5p | 8   | 107832279 | 107832300 | -      | edit | 1        | 0        | 0.0%   | 0         | 0.0%  | 0         | 0.0%   |
| mmu-mir-328-5p | 8   | 107832279 | 107832300 | -      | edit | 2        | 0        | 0.0%   | 0         | 0.0%  | 0         | 0.0%   |
| mmu-mir-328-5p | 8   | 107832279 | 107832300 | -      | edit | 3        | 0        | 0.0%   | 0         | 0.0%  | 0         | 0.0%   |
| mmu-mir-328-5p | 8   | 107832279 | 107832300 | -      | edit | 4        | 0        | 0.0%   | 0         | 0.0%  | 0         | 0.0%   |
| mmu-mir-328-5p | 8   | 107832279 | 107832300 | -      | edit | 5        | 0        | 0.0%   | 0         | 0.0%  | 0         | 0.0%   |
| mmu-mir-328-5p | 8   | 107832279 | 107832300 | -      | edit | 6        | 0        | 0.0%   | 0         | 0.0%  | 0         | 0.0%   |
| mmu-mir-328-5p | 8   | 107832279 | 107832300 | -      | edit | 7        | 0        | 0.0%   | 0         | 0.0%  | 0         | 0.0%   |
| mmu-mir-328-5p | 8   | 107832279 | 107832300 | -      | edit | 8        | 0        | 0.0%   | 0         | 0.0%  | 0         | 0.0%   |
| mmu-mir-328-5p | 8   | 107832279 | 107832300 | -      | edit | 9        | 0        | 0.0%   | 0         | 0.0%  | 0         | 0.0%   |
| mmu-mir-328-5p | 8   | 107832279 | 107832300 | -      | edit | 10       | 0        | 0.0%   | 0         | 0.0%  | 0         | 0.0%   |
| mmu-mir-328-5p | 8   | 107832279 | 107832300 | -      | edit | 11       | 0        | 0.0%   | 0         | 0.0%  | 0         | 0.0%   |
| mmu-mir-328-5p | 8   | 107832279 | 107832300 | -      | edit | 12       | 0        | 0.0%   | 0         | 0.0%  | 0         | 0.0%   |
| mmu-mir-328-5p | 8   | 107832279 | 107832300 | -      | edit | 13       | 0        | 0.0%   | 0         | 0.0%  | 0         | 0.0%   |
| mmu-mir-328-5p | 8   | 107832279 | 107832300 | -      | edit | 14       | 0        | 0.0%   | 0         | 0.0%  | 0         | 0.0%   |
| mmu-mir-328-5p | 8   | 107832279 | 107832300 | -      | edit | 15       | 0        | 0.0%   | 3         | 3.3%  | 0         | 0.0%   |
| mmu-mir-328-5p | 8   | 107832279 | 107832300 | -      | edit | 16       | 0        | 0.0%   | 0         | 0.0%  | 0         | 0.0%   |
| mmu-mir-328-5p | 8   | 107832279 | 107832300 | -      | edit | 17       | 0        | 0.0%   | 0         | 0.0%  | 0         | 0.0%   |
| mmu-mir-328-5p | 8   | 107832279 | 107832300 | -      | edit | 18       | 0        | 0.0%   | 0         | 0.0%  | 0         | 0.0%   |
| mmu-mir-328-5p | 8   | 107832279 | 107832300 | -      | edit | 19       | 0        | 0.0%   | 0         | 0.0%  | 0         | 0.0%   |
| mmu-mir-328-5p | 8   | 107832279 | 107832300 | -      | edit | 20       | 0        | 0.0%   | 0         | 0.0%  | 0         | 0.0%   |
| mmu-mir-328-5p | 8   | 107832279 | 107832300 | -      | edit | 21       | 0        | 0.0%   | 0         | 0.0%  | 0         | 0.0%   |
| mmu-mir-328-5p | 8   | 107832279 | 107832300 | -      | edit | 22       | 0        | 0.0%   | 0         | 0.0%  | 0         | 0.0%   |
| EDITED         |     |           |           |        |      |          | 0        | 0.0%   | 3         | 3.3%  | 0         | 0.0%   |
| CANONICAL      |     |           |           |        |      |          | 116      | 100.0% | 89        | 96.7% | 53        | 100.0% |
| TOTAL          |     |           |           |        |      |          | 116      |        | 92        |       | 53        |        |

| miRNA          | Chr | Start    | Stop     | Strand | Type | Position | P7 reads | P7%    | P10 reads | P10%  | P14 reads | P14%   |
|----------------|-----|----------|----------|--------|------|----------|----------|--------|-----------|-------|-----------|--------|
| mmu-mir-330-3p | 7   | 19766874 | 19766896 | +      | edit | 1        | 0        | 0.0%   | 0         | 0.0%  | 0         | 0.0%   |
| mmu-mir-330-3p | 7   | 19766874 | 19766896 | +      | edit | 2        | 0        | 0.0%   | 0         | 0.0%  | 0         | 0.0%   |
| mmu-mir-330-3p | 7   | 19766874 | 19766896 | +      | edit | 3        | 0        | 0.0%   | 0         | 0.0%  | 0         | 0.0%   |
| mmu-mir-330-3p | 7   | 19766874 | 19766896 | +      | edit | 4        | 0        | 0.0%   | 0         | 0.0%  | 0         | 0.0%   |
| mmu-mir-330-3p | 7   | 19766874 | 19766896 | +      | edit | 5        | 0        | 0.0%   | 0         | 0.0%  | 0         | 0.0%   |
| mmu-mir-330-3p | 7   | 19766874 | 19766896 | +      | edit | 6        | 0        | 0.0%   | 0         | 0.0%  | 0         | 0.0%   |
| mmu-mir-330-3p | 7   | 19766874 | 19766896 | +      | edit | 7        | 0        | 0.0%   | 0         | 0.0%  | 0         | 0.0%   |
| mmu-mir-330-3p | 7   | 19766874 | 19766896 | +      | edit | 8        | 0        | 0.0%   | 0         | 0.0%  | 0         | 0.0%   |
| mmu-mir-330-3p | 7   | 19766874 | 19766896 | +      | edit | 9        | 0        | 0.0%   | 0         | 0.0%  | 0         | 0.0%   |
| mmu-mir-330-3p | 7   | 19766874 | 19766896 | +      | edit | 10       | 0        | 0.0%   | 0         | 0.0%  | 0         | 0.0%   |
| mmu-mir-330-3p | 7   | 19766874 | 19766896 | +      | edit | 11       | 0        | 0.0%   | 0         | 0.0%  | 0         | 0.0%   |
| mmu-mir-330-3p | 7   | 19766874 | 19766896 | +      | edit | 12       | 0        | 0.0%   | 0         | 0.0%  | 0         | 0.0%   |
| mmu-mir-330-3p | 7   | 19766874 | 19766896 | +      | edit | 13       | 0        | 0.0%   | 0         | 0.0%  | 0         | 0.0%   |
| mmu-mir-330-3p | 7   | 19766874 | 19766896 | +      | edit | 14       | 0        | 0.0%   | 0         | 0.0%  | 0         | 0.0%   |
| mmu-mir-330-3p | 7   | 19766874 | 19766896 | +      | edit | 15       | 0        | 0.0%   | 0         | 0.0%  | 0         | 0.0%   |
| mmu-mir-330-3p | 7   | 19766874 | 19766896 | +      | edit | 16       | 0        | 0.0%   | 0         | 0.0%  | 0         | 0.0%   |
| mmu-mir-330-3p | 7   | 19766874 | 19766896 | +      | edit | 17       | 0        | 0.0%   | 0         | 0.0%  | 0         | 0.0%   |
| mmu-mir-330-3p | 7   | 19766874 | 19766896 | +      | edit | 18       | 0        | 0.0%   | 0         | 0.0%  | 0         | 0.0%   |
| mmu-mir-330-3p | 7   | 19766874 | 19766896 | +      | edit | 19       | 0        | 0.0%   | 3         | 2.4%  | 0         | 0.0%   |
| mmu-mir-330-3p | 7   | 19766874 | 19766896 | +      | edit | 20       | 0        | 0.0%   | 0         | 0.0%  | 0         | 0.0%   |
| mmu-mir-330-3p | 7   | 19766874 | 19766896 | +      | edit | 21       | 0        | 0.0%   | 0         | 0.0%  | 0         | 0.0%   |
| mmu-mir-330-3p | 7   | 19766874 | 19766896 | +      | edit | 22       | 0        | 0.0%   | 0         | 0.0%  | 0         | 0.0%   |
| EDITED         |     |          |          |        |      |          | 0        | 0.0%   | 3         | 2.4%  | 0         | 0.0%   |
| CANONICAL      |     |          |          |        |      |          | 216      | 100.0% | 124       | 97.6% | 53        | 100.0% |
| TOTAL          |     |          |          |        |      |          | 216      |        | 127       |       | 53        |        |

| miRNA          | Chr | Start     | Stop      | Strand | Type | Position | P7 reads | P7%         | P10 reads | P10%        | P14 reads | P14%   |
|----------------|-----|-----------|-----------|--------|------|----------|----------|-------------|-----------|-------------|-----------|--------|
| mmu-mir-337-5p | 12  | 110824025 | 110824045 | +      | edit | 1        | 0        | 0.0%        | 0         | 0.0%        | 0         | 0.0%   |
| mmu-mir-337-5p | 12  | 110824025 | 110824045 | +      | edit | 2        | 0        | 0.0%        | 0         | 0.0%        | 0         | 0.0%   |
| mmu-mir-337-5p | 12  | 110824025 | 110824045 | +      | edit | 3        | 0        | 0.0%        | 0         | 0.0%        | 0         | 0.0%   |
| mmu-mir-337-5p | 12  | 110824025 | 110824045 | +      | edit | 4        | 0        | 0.0%        | 0         | 0.0%        | 0         | 0.0%   |
| mmu-mir-337-5p | 12  | 110824025 | 110824045 | +      | edit | 5        | 0        | 0.0%        | 0         | 0.0%        | 0         | 0.0%   |
| mmu-mir-337-5p | 12  | 110824025 | 110824045 | +      | edit | 6        | 0        | 0.0%        | 0         | 0.0%        | 0         | 0.0%   |
| mmu-mir-337-5p | 12  | 110824025 | 110824045 | +      | edit | 7        | 0        | 0.0%        | 0         | 0.0%        | 0         | 0.0%   |
| mmu-mir-337-5p | 12  | 110824025 | 110824045 | +      | edit | 8        | 0        | 0.0%        | 0         | 0.0%        | 0         | 0.0%   |
| mmu-mir-337-5p | 12  | 110824025 | 110824045 | +      | edit | 9        | 0        | 0.0%        | 0         | 0.0%        | 0         | 0.0%   |
| mmu-mir-337-5p | 12  | 110824025 | 110824045 | +      | edit | 10       | 0        | 0.0%        | 0         | 0.0%        | 0         | 0.0%   |
| mmu-mir-337-5p | 12  | 110824025 | 110824045 | +      | edit | 11       | 0        | 0.0%        | 0         | 0.0%        | 0         | 0.0%   |
| mmu-mir-337-5p | 12  | 110824025 | 110824045 | +      | edit | 12       | 0        | 0.0%        | 0         | 0.0%        | 0         | 0.0%   |
| mmu-mir-337-5p | 12  | 110824025 | 110824045 | +      | edit | 13       | 0        | 0.0%        | 0         | 0.0%        | 0         | 0.0%   |
| mmu-mir-337-5p | 12  | 110824025 | 110824045 | +      | edit | 14       | 0        | 0.0%        | 0         | 0.0%        | 0         | 0.0%   |
| mmu-mir-337-5p | 12  | 110824025 | 110824045 | +      | edit | 15       | 0        | 0.0%        | 0         | 0.0%        | 0         | 0.0%   |
| mmu-mir-337-5p | 12  | 110824025 | 110824045 | +      | edit | 16       | 0        | 0.0%        | 0         | 0.0%        | 0         | 0.0%   |
| mmu-mir-337-5p | 12  | 110824025 | 110824045 | +      | edit | 17       | 0        | 0.0%        | 0         | 0.0%        | 0         | 0.0%   |
| mmu-mir-337-5p | 12  | 110824025 | 110824045 | +      | edit | 18       | <b>3</b> | <b>0.7%</b> | <b>9</b>  | <b>5.3%</b> | 0         | 0.0%   |
| mmu-mir-337-5p | 12  | 110824025 | 110824045 | +      | edit | 19       | 0        | 0.0%        | 0         | 0.0%        | 0         | 0.0%   |
| mmu-mir-337-5p | 12  | 110824025 | 110824045 | +      | edit | 20       | 0        | 0.0%        | 0         | 0.0%        | 0         | 0.0%   |
| mmu-mir-337-5p | 12  | 110824025 | 110824045 | +      | edit | 21       | 0        | 0.0%        | 0         | 0.0%        | 0         | 0.0%   |
| mmu-mir-337-5p | 12  | 110824025 | 110824045 | +      | edit | 22       | 0        | 0.0%        | 0         | 0.0%        | 0         | 0.0%   |
| EDITED         |     |           |           |        |      |          | 3        | 0.7%        | 9         | 5.3%        | 0         | 0.0%   |
| CANONICAL      |     |           |           |        |      |          | 403      | 99.3%       | 151       | 94.7%       | 47        | 100.0% |
| TOTAL          |     |           |           |        |      |          | 406      |             | 160       |             | 47        |        |

| miRNA          | Chr | Start    | Stop     | Strand | Type    | Position | P7 reads | P7%   | P10 reads | P10%  | P14 reads | P14%  |
|----------------|-----|----------|----------|--------|---------|----------|----------|-------|-----------|-------|-----------|-------|
| mmu-mir-340-5p | 11  | 49883222 | 49883243 | +      | 3' Edit | 3'       | 0        | 0.0%  | 0         | 0.0%  | 3         | 0.1%  |
| mmu-mir-340-5p | 11  | 49883222 | 49883243 | +      | Indel   | 22       | 0        | 0.0%  | 0         | 0.0%  | 3         | 0.1%  |
| mmu-mir-340-5p | 11  | 49883222 | 49883243 | +      | edit    | 1        | 0        | 0.0%  | 0         | 0.0%  | 0         | 0.0%  |
| mmu-mir-340-5p | 11  | 49883222 | 49883243 | +      | edit    | 2        | 0        | 0.0%  | 0         | 0.0%  | 0         | 0.0%  |
| mmu-mir-340-5p | 11  | 49883222 | 49883243 | +      | edit    | 3        | 0        | 0.0%  | 0         | 0.0%  | 0         | 0.0%  |
| mmu-mir-340-5p | 11  | 49883222 | 49883243 | +      | edit    | 4        | 0        | 0.0%  | 0         | 0.0%  | 0         | 0.0%  |
| mmu-mir-340-5p | 11  | 49883222 | 49883243 | +      | edit    | 5        | 0        | 0.0%  | 0         | 0.0%  | 0         | 0.0%  |
| mmu-mir-340-5p | 11  | 49883222 | 49883243 | +      | edit    | 6        | 0        | 0.0%  | 0         | 0.0%  | 0         | 0.0%  |
| mmu-mir-340-5p | 11  | 49883222 | 49883243 | +      | edit    | 7        | 0        | 0.0%  | 0         | 0.0%  | 0         | 0.0%  |
| mmu-mir-340-5p | 11  | 49883222 | 49883243 | +      | edit    | 8        | 7        | 0.1%  | 0         | 0.0%  | 0         | 0.0%  |
| mmu-mir-340-5p | 11  | 49883222 | 49883243 | +      | edit    | 9        | 0        | 0.0%  | 0         | 0.0%  | 0         | 0.0%  |
| mmu-mir-340-5p | 11  | 49883222 | 49883243 | +      | edit    | 10       | 0        | 0.0%  | 0         | 0.0%  | 0         | 0.0%  |
| mmu-mir-340-5p | 11  | 49883222 | 49883243 | +      | edit    | 11       | 0        | 0.0%  | 0         | 0.0%  | 0         | 0.0%  |
| mmu-mir-340-5p | 11  | 49883222 | 49883243 | +      | edit    | 12       | 0        | 0.0%  | 0         | 0.0%  | 0         | 0.0%  |
| mmu-mir-340-5p | 11  | 49883222 | 49883243 | +      | edit    | 13       | 0        | 0.0%  | 0         | 0.0%  | 0         | 0.0%  |
| mmu-mir-340-5p | 11  | 49883222 | 49883243 | +      | edit    | 14       | 0        | 0.0%  | 0         | 0.0%  | 0         | 0.0%  |
| mmu-mir-340-5p | 11  | 49883222 | 49883243 | +      | edit    | 15       | 0        | 0.0%  | 0         | 0.0%  | 3         | 0.1%  |
| mmu-mir-340-5p | 11  | 49883222 | 49883243 | +      | edit    | 16       | 0        | 0.0%  | 0         | 0.0%  | 0         | 0.0%  |
| mmu-mir-340-5p | 11  | 49883222 | 49883243 | +      | edit    | 17       | 0        | 0.0%  | 0         | 0.0%  | 0         | 0.0%  |
| mmu-mir-340-5p | 11  | 49883222 | 49883243 | +      | edit    | 18       | 0        | 0.0%  | 0         | 0.0%  | 0         | 0.0%  |
| mmu-mir-340-5p | 11  | 49883222 | 49883243 | +      | edit    | 19       | 3        | 0.0%  | 0         | 0.0%  | 0         | 0.0%  |
| mmu-mir-340-5p | 11  | 49883222 | 49883243 | +      | edit    | 20       | 0        | 0.0%  | 0         | 0.0%  | 0         | 0.0%  |
| mmu-mir-340-5p | 11  | 49883222 | 49883243 | +      | edit    | 21       | 0        | 0.0%  | 0         | 0.0%  | 0         | 0.0%  |
| mmu-mir-340-5p | 11  | 49883222 | 49883243 | +      | edit    | 22       | 0        | 0.0%  | 5         | 0.1%  | 0         | 0.0%  |
| EDITED         |     |          |          |        |         |          | 10       | 0.2%  | 5         | 0.1%  | 9         | 0.2%  |
| CANONICAL      |     |          |          |        |         |          | 6713     | 99.8% | 4471      | 99.9% | 3665      | 99.8% |
| TOTAL          |     |          |          |        |         |          | 6723     |       | 4476      |       | 3674      |       |

| miRNA          | Chr | Start     | Stop      | Strand | Type    | Position | P7 reads | P7%   | P10 reads | P10%   | P14 reads | P14%   |
|----------------|-----|-----------|-----------|--------|---------|----------|----------|-------|-----------|--------|-----------|--------|
| mmu-mir-341-5p | 12  | 110849766 | 110849786 | +      | 3' Edit | 3'       | 3        | 0.1%  | 0         | 0.0%   | 0         | 0.0%   |
| mmu-mir-341-5p | 12  | 110849766 | 110849786 | +      | edit    | 1        | 0        | 0.0%  | 0         | 0.0%   | 0         | 0.0%   |
| mmu-mir-341-5p | 12  | 110849766 | 110849786 | +      | edit    | 2        | 0        | 0.0%  | 0         | 0.0%   | 0         | 0.0%   |
| mmu-mir-341-5p | 12  | 110849766 | 110849786 | +      | edit    | 3        | 0        | 0.0%  | 0         | 0.0%   | 0         | 0.0%   |
| mmu-mir-341-5p | 12  | 110849766 | 110849786 | +      | edit    | 4        | 0        | 0.0%  | 0         | 0.0%   | 0         | 0.0%   |
| mmu-mir-341-5p | 12  | 110849766 | 110849786 | +      | edit    | 5        | 0        | 0.0%  | 0         | 0.0%   | 0         | 0.0%   |
| mmu-mir-341-5p | 12  | 110849766 | 110849786 | +      | edit    | 6        | 0        | 0.0%  | 0         | 0.0%   | 0         | 0.0%   |
| mmu-mir-341-5p | 12  | 110849766 | 110849786 | +      | edit    | 7        | 0        | 0.0%  | 0         | 0.0%   | 0         | 0.0%   |
| mmu-mir-341-5p | 12  | 110849766 | 110849786 | +      | edit    | 8        | 0        | 0.0%  | 0         | 0.0%   | 0         | 0.0%   |
| mmu-mir-341-5p | 12  | 110849766 | 110849786 | +      | edit    | 9        | 0        | 0.0%  | 0         | 0.0%   | 0         | 0.0%   |
| mmu-mir-341-5p | 12  | 110849766 | 110849786 | +      | edit    | 10       | 0        | 0.0%  | 0         | 0.0%   | 0         | 0.0%   |
| mmu-mir-341-5p | 12  | 110849766 | 110849786 | +      | edit    | 11       | 0        | 0.0%  | 0         | 0.0%   | 0         | 0.0%   |
| mmu-mir-341-5p | 12  | 110849766 | 110849786 | +      | edit    | 12       | 0        | 0.0%  | 0         | 0.0%   | 0         | 0.0%   |
| mmu-mir-341-5p | 12  | 110849766 | 110849786 | +      | edit    | 13       | 0        | 0.0%  | 0         | 0.0%   | 0         | 0.0%   |
| mmu-mir-341-5p | 12  | 110849766 | 110849786 | +      | edit    | 14       | 0        | 0.0%  | 0         | 0.0%   | 0         | 0.0%   |
| mmu-mir-341-5p | 12  | 110849766 | 110849786 | +      | edit    | 15       | 0        | 0.0%  | 0         | 0.0%   | 0         | 0.0%   |
| mmu-mir-341-5p | 12  | 110849766 | 110849786 | +      | edit    | 16       | 0        | 0.0%  | 0         | 0.0%   | 0         | 0.0%   |
| mmu-mir-341-5p | 12  | 110849766 | 110849786 | +      | edit    | 17       | 0        | 0.0%  | 0         | 0.0%   | 0         | 0.0%   |
| mmu-mir-341-5p | 12  | 110849766 | 110849786 | +      | edit    | 18       | 0        | 0.0%  | 0         | 0.0%   | 0         | 0.0%   |
| mmu-mir-341-5p | 12  | 110849766 | 110849786 | +      | edit    | 19       | 0        | 0.0%  | 0         | 0.0%   | 0         | 0.0%   |
| mmu-mir-341-5p | 12  | 110849766 | 110849786 | +      | edit    | 20       | 0        | 0.0%  | 0         | 0.0%   | 0         | 0.0%   |
| mmu-mir-341-5p | 12  | 110849766 | 110849786 | +      | edit    | 21       | 0        | 0.0%  | 0         | 0.0%   | 0         | 0.0%   |
| mmu-mir-341-5p | 12  | 110849766 | 110849786 | +      | edit    | 22       | 0        | 0.0%  | 0         | 0.0%   | 0         | 0.0%   |
| EDITED         |     |           |           |        |         |          | 3        | 0.1%  | 0         | 0.0%   | 0         | 0.0%   |
| CANONICAL      |     |           |           |        |         |          | 2419     | 99.9% | 931       | 100.0% | 211       | 100.0% |
| TOTAL          |     |           |           |        |         |          | 2422     |       | 931       |        | 211       |        |

| miRNA          | Chr | Start     | Stop      | Strand | Type | Position | P7 reads | P7%   | P10 reads | P10%  | P14 reads | P14%  |
|----------------|-----|-----------|-----------|--------|------|----------|----------|-------|-----------|-------|-----------|-------|
| mmu-mir-342-3p | 12  | 109896890 | 109896912 | +      | edit | 1        | 0        | 0.0%  | 0         | 0.0%  | 0         | 0.0%  |
| mmu-mir-342-3p | 12  | 109896890 | 109896912 | +      | edit | 2        | 0        | 0.0%  | 0         | 0.0%  | 0         | 0.0%  |
| mmu-mir-342-3p | 12  | 109896890 | 109896912 | +      | edit | 3        | 0        | 0.0%  | 0         | 0.0%  | 0         | 0.0%  |
| mmu-mir-342-3p | 12  | 109896890 | 109896912 | +      | edit | 4        | 0        | 0.0%  | 0         | 0.0%  | 0         | 0.0%  |
| mmu-mir-342-3p | 12  | 109896890 | 109896912 | +      | edit | 5        | 0        | 0.0%  | 0         | 0.0%  | 0         | 0.0%  |
| mmu-mir-342-3p | 12  | 109896890 | 109896912 | +      | edit | 6        | 0        | 0.0%  | 0         | 0.0%  | 0         | 0.0%  |
| mmu-mir-342-3p | 12  | 109896890 | 109896912 | +      | edit | 7        | 0        | 0.0%  | 0         | 0.0%  | 0         | 0.0%  |
| mmu-mir-342-3p | 12  | 109896890 | 109896912 | +      | edit | 8        | 0        | 0.0%  | 0         | 0.0%  | 0         | 0.0%  |
| mmu-mir-342-3p | 12  | 109896890 | 109896912 | +      | edit | 9        | 0        | 0.0%  | 0         | 0.0%  | 0         | 0.0%  |
| mmu-mir-342-3p | 12  | 109896890 | 109896912 | +      | edit | 10       | 0        | 0.0%  | 0         | 0.0%  | 0         | 0.0%  |
| mmu-mir-342-3p | 12  | 109896890 | 109896912 | +      | edit | 11       | 0        | 0.0%  | 0         | 0.0%  | 0         | 0.0%  |
| mmu-mir-342-3p | 12  | 109896890 | 109896912 | +      | edit | 12       | 0        | 0.0%  | 0         | 0.0%  | 0         | 0.0%  |
| mmu-mir-342-3p | 12  | 109896890 | 109896912 | +      | edit | 13       | 0        | 0.0%  | 0         | 0.0%  | 0         | 0.0%  |
| mmu-mir-342-3p | 12  | 109896890 | 109896912 | +      | edit | 14       | 0        | 0.0%  | 0         | 0.0%  | 0         | 0.0%  |
| mmu-mir-342-3p | 12  | 109896890 | 109896912 | +      | edit | 15       | 0        | 0.0%  | 0         | 0.0%  | 0         | 0.0%  |
| mmu-mir-342-3p | 12  | 109896890 | 109896912 | +      | edit | 16       | 0        | 0.0%  | 0         | 0.0%  | 0         | 0.0%  |
| mmu-mir-342-3p | 12  | 109896890 | 109896912 | +      | edit | 17       | 0        | 0.0%  | 0         | 0.0%  | 0         | 0.0%  |
| mmu-mir-342-3p | 12  | 109896890 | 109896912 | +      | edit | 18       | 0        | 0.0%  | 0         | 0.0%  | 0         | 0.0%  |
| mmu-mir-342-3p | 12  | 109896890 | 109896912 | +      | edit | 19       | 9        | 1.5%  | 5         | 0.5%  | 5         | 0.8%  |
| mmu-mir-342-3p | 12  | 109896890 | 109896912 | +      | edit | 20       | 0        | 0.0%  | 0         | 0.0%  | 0         | 0.0%  |
| mmu-mir-342-3p | 12  | 109896890 | 109896912 | +      | edit | 21       | 3        | 0.5%  | 0         | 0.0%  | 0         | 0.0%  |
| mmu-mir-342-3p | 12  | 109896890 | 109896912 | +      | edit | 22       | 0        | 0.0%  | 0         | 0.0%  | 0         | 0.0%  |
| EDITED         |     |           |           |        |      |          | 12       | 2.0%  | 5         | 0.5%  | 5         | 0.8%  |
| CANONICAL      |     |           |           |        |      |          | 591      | 98.0% | 977       | 99.5% | 620       | 99.2% |
| TOTAL          |     |           |           |        |      |          | 603      |       | 982       |       | 625       |       |

| miRNA          | Chr | Start     | Stop      | Strand | Type    | Position | P7 reads | P7%   | P10 reads | P10%  | P14 reads | P14%  |
|----------------|-----|-----------|-----------|--------|---------|----------|----------|-------|-----------|-------|-----------|-------|
| mmu-mir-342-5p | 12  | 109896848 | 109896869 | +      | 3' Edit | 3'       | 0        | 0.0%  | 0         | 0.0%  | 3         | 1.7%  |
| mmu-mir-342-5p | 12  | 109896848 | 109896869 | +      | edit    | 1        | 0        | 0.0%  | 0         | 0.0%  | 0         | 0.0%  |
| mmu-mir-342-5p | 12  | 109896848 | 109896869 | +      | edit    | 2        | 0        | 0.0%  | 0         | 0.0%  | 0         | 0.0%  |
| mmu-mir-342-5p | 12  | 109896848 | 109896869 | +      | edit    | 3        | 0        | 0.0%  | 0         | 0.0%  | 0         | 0.0%  |
| mmu-mir-342-5p | 12  | 109896848 | 109896869 | +      | edit    | 4        | 0        | 0.0%  | 0         | 0.0%  | 0         | 0.0%  |
| mmu-mir-342-5p | 12  | 109896848 | 109896869 | +      | edit    | 5        | 0        | 0.0%  | 0         | 0.0%  | 0         | 0.0%  |
| mmu-mir-342-5p | 12  | 109896848 | 109896869 | +      | edit    | 6        | 3        | 0.7%  | 0         | 0.0%  | 0         | 0.0%  |
| mmu-mir-342-5p | 12  | 109896848 | 109896869 | +      | edit    | 7        | 0        | 0.0%  | 0         | 0.0%  | 0         | 0.0%  |
| mmu-mir-342-5p | 12  | 109896848 | 109896869 | +      | edit    | 8        | 0        | 0.0%  | 0         | 0.0%  | 0         | 0.0%  |
| mmu-mir-342-5p | 12  | 109896848 | 109896869 | +      | edit    | 9        | 0        | 0.0%  | 0         | 0.0%  | 0         | 0.0%  |
| mmu-mir-342-5p | 12  | 109896848 | 109896869 | +      | edit    | 10       | 0        | 0.0%  | 0         | 0.0%  | 0         | 0.0%  |
| mmu-mir-342-5p | 12  | 109896848 | 109896869 | +      | edit    | 11       | 0        | 0.0%  | 0         | 0.0%  | 0         | 0.0%  |
| mmu-mir-342-5p | 12  | 109896848 | 109896869 | +      | edit    | 12       | 0        | 0.0%  | 0         | 0.0%  | 0         | 0.0%  |
| mmu-mir-342-5p | 12  | 109896848 | 109896869 | +      | edit    | 13       | 0        | 0.0%  | 0         | 0.0%  | 0         | 0.0%  |
| mmu-mir-342-5p | 12  | 109896848 | 109896869 | +      | edit    | 14       | 0        | 0.0%  | 0         | 0.0%  | 0         | 0.0%  |
| mmu-mir-342-5p | 12  | 109896848 | 109896869 | +      | edit    | 15       | 4        | 0.8%  | 0         | 0.0%  | 0         | 0.0%  |
| mmu-mir-342-5p | 12  | 109896848 | 109896869 | +      | edit    | 16       | 0        | 0.0%  | 0         | 0.0%  | 0         | 0.0%  |
| mmu-mir-342-5p | 12  | 109896848 | 109896869 | +      | edit    | 17       | 0        | 0.0%  | 5         | 1.4%  | 0         | 0.0%  |
| mmu-mir-342-5p | 12  | 109896848 | 109896869 | +      | edit    | 18       | 0        | 0.0%  | 0         | 0.0%  | 0         | 0.0%  |
| mmu-mir-342-5p | 12  | 109896848 | 109896869 | +      | edit    | 19       | 0        | 0.0%  | 0         | 0.0%  | 0         | 0.0%  |
| mmu-mir-342-5p | 12  | 109896848 | 109896869 | +      | edit    | 20       | 0        | 0.0%  | 0         | 0.0%  | 0         | 0.0%  |
| mmu-mir-342-5p | 12  | 109896848 | 109896869 | +      | edit    | 21       | 0        | 0.0%  | 8         | 2.3%  | 3         | 1.7%  |
| mmu-mir-342-5p | 12  | 109896848 | 109896869 | +      | edit    | 22       | 0        | 0.0%  | 0         | 0.0%  | 0         | 0.0%  |
| EDITED         |     |           |           |        |         |          | 7        | 1.5%  | 13        | 3.7%  | 6         | 3.3%  |
| CANONICAL      |     |           |           |        |         |          | 441      | 98.5% | 342       | 96.3% | 175       | 96.7% |
| TOTAL          |     |           |           |        |         |          | 448      |       | 355       |       | 181       |       |

| miRNA          | Chr | Start     | Stop      | Strand | Type | Position | P7 reads | P7%   | P10 reads | P10%   | P14 reads | P14%   |
|----------------|-----|-----------|-----------|--------|------|----------|----------|-------|-----------|--------|-----------|--------|
| mmu-mir-345-3p | 12  | 110075237 | 110075258 | +      | edit | 1        | 0        | 0.0%  | 0         | 0.0%   | 0         | 0.0%   |
| mmu-mir-345-3p | 12  | 110075237 | 110075258 | +      | edit | 2        | 0        | 0.0%  | 0         | 0.0%   | 0         | 0.0%   |
| mmu-mir-345-3p | 12  | 110075237 | 110075258 | +      | edit | 3        | 0        | 0.0%  | 0         | 0.0%   | 0         | 0.0%   |
| mmu-mir-345-3p | 12  | 110075237 | 110075258 | +      | edit | 4        | 0        | 0.0%  | 0         | 0.0%   | 0         | 0.0%   |
| mmu-mir-345-3p | 12  | 110075237 | 110075258 | +      | edit | 5        | 0        | 0.0%  | 0         | 0.0%   | 0         | 0.0%   |
| mmu-mir-345-3p | 12  | 110075237 | 110075258 | +      | edit | 6        | 0        | 0.0%  | 0         | 0.0%   | 0         | 0.0%   |
| mmu-mir-345-3p | 12  | 110075237 | 110075258 | +      | edit | 7        | 0        | 0.0%  | 0         | 0.0%   | 0         | 0.0%   |
| mmu-mir-345-3p | 12  | 110075237 | 110075258 | +      | edit | 8        | 0        | 0.0%  | 0         | 0.0%   | 0         | 0.0%   |
| mmu-mir-345-3p | 12  | 110075237 | 110075258 | +      | edit | 9        | 0        | 0.0%  | 0         | 0.0%   | 0         | 0.0%   |
| mmu-mir-345-3p | 12  | 110075237 | 110075258 | +      | edit | 10       | 0        | 0.0%  | 0         | 0.0%   | 0         | 0.0%   |
| mmu-mir-345-3p | 12  | 110075237 | 110075258 | +      | edit | 11       | 0        | 0.0%  | 0         | 0.0%   | 0         | 0.0%   |
| mmu-mir-345-3p | 12  | 110075237 | 110075258 | +      | edit | 12       | 0        | 0.0%  | 0         | 0.0%   | 0         | 0.0%   |
| mmu-mir-345-3p | 12  | 110075237 | 110075258 | +      | edit | 13       | 0        | 0.0%  | 0         | 0.0%   | 0         | 0.0%   |
| mmu-mir-345-3p | 12  | 110075237 | 110075258 | +      | edit | 14       | 6        | 0.5%  | 0         | 0.0%   | 0         | 0.0%   |
| mmu-mir-345-3p | 12  | 110075237 | 110075258 | +      | edit | 15       | 0        | 0.0%  | 0         | 0.0%   | 0         | 0.0%   |
| mmu-mir-345-3p | 12  | 110075237 | 110075258 | +      | edit | 16       | 0        | 0.0%  | 0         | 0.0%   | 0         | 0.0%   |
| mmu-mir-345-3p | 12  | 110075237 | 110075258 | +      | edit | 17       | 0        | 0.0%  | 0         | 0.0%   | 0         | 0.0%   |
| mmu-mir-345-3p | 12  | 110075237 | 110075258 | +      | edit | 18       | 0        | 0.0%  | 0         | 0.0%   | 0         | 0.0%   |
| mmu-mir-345-3p | 12  | 110075237 | 110075258 | +      | edit | 19       | 0        | 0.0%  | 0         | 0.0%   | 0         | 0.0%   |
| mmu-mir-345-3p | 12  | 110075237 | 110075258 | +      | edit | 20       | 0        | 0.0%  | 0         | 0.0%   | 0         | 0.0%   |
| mmu-mir-345-3p | 12  | 110075237 | 110075258 | +      | edit | 21       | 0        | 0.0%  | 0         | 0.0%   | 0         | 0.0%   |
| mmu-mir-345-3p | 12  | 110075237 | 110075258 | +      | edit | 22       | 0        | 0.0%  | 0         | 0.0%   | 0         | 0.0%   |
| EDITED         |     |           |           |        |      |          | 6        | 0.5%  | 0         | 0.0%   | 0         | 0.0%   |
| CANONICAL      |     |           |           |        |      |          | 997      | 99.5% | 331       | 100.0% | 242       | 100.0% |
| TOTAL          |     |           |           |        |      |          | 1003     |       | 331       |        | 242       |        |



| miRNA          | Chr | Start    | Stop     | Strand | Type | Position | P7 reads | P7%   | P10 reads | P10%  | P14 reads | P14%   |
|----------------|-----|----------|----------|--------|------|----------|----------|-------|-----------|-------|-----------|--------|
| mmu-mir-351-5p | X   | 50406492 | 50406515 | -      | edit | 1        | 0        | 0.0%  | 0         | 0.0%  | 0         | 0.0%   |
| mmu-mir-351-5p | X   | 50406492 | 50406515 | -      | edit | 2        | 0        | 0.0%  | 0         | 0.0%  | 0         | 0.0%   |
| mmu-mir-351-5p | X   | 50406492 | 50406515 | -      | edit | 3        | 0        | 0.0%  | 0         | 0.0%  | 0         | 0.0%   |
| mmu-mir-351-5p | X   | 50406492 | 50406515 | -      | edit | 4        | 0        | 0.0%  | 0         | 0.0%  | 0         | 0.0%   |
| mmu-mir-351-5p | X   | 50406492 | 50406515 | -      | edit | 5        | 0        | 0.0%  | 0         | 0.0%  | 0         | 0.0%   |
| mmu-mir-351-5p | X   | 50406492 | 50406515 | -      | edit | 6        | 0        | 0.0%  | 0         | 0.0%  | 0         | 0.0%   |
| mmu-mir-351-5p | X   | 50406492 | 50406515 | -      | edit | 7        | 0        | 0.0%  | 0         | 0.0%  | 0         | 0.0%   |
| mmu-mir-351-5p | X   | 50406492 | 50406515 | -      | edit | 8        | 0        | 0.0%  | 0         | 0.0%  | 0         | 0.0%   |
| mmu-mir-351-5p | X   | 50406492 | 50406515 | -      | edit | 9        | 0        | 0.0%  | 0         | 0.0%  | 0         | 0.0%   |
| mmu-mir-351-5p | X   | 50406492 | 50406515 | -      | edit | 10       | 0        | 0.0%  | 0         | 0.0%  | 0         | 0.0%   |
| mmu-mir-351-5p | X   | 50406492 | 50406515 | -      | edit | 11       | 0        | 0.0%  | 0         | 0.0%  | 0         | 0.0%   |
| mmu-mir-351-5p | X   | 50406492 | 50406515 | -      | edit | 12       | 0        | 0.0%  | 0         | 0.0%  | 0         | 0.0%   |
| mmu-mir-351-5p | X   | 50406492 | 50406515 | -      | edit | 13       | 0        | 0.0%  | 0         | 0.0%  | 0         | 0.0%   |
| mmu-mir-351-5p | X   | 50406492 | 50406515 | -      | edit | 14       | 0        | 0.0%  | 0         | 0.0%  | 0         | 0.0%   |
| mmu-mir-351-5p | X   | 50406492 | 50406515 | -      | edit | 15       | 4        | 0.3%  | 0         | 0.0%  | 0         | 0.0%   |
| mmu-mir-351-5p | X   | 50406492 | 50406515 | -      | edit | 16       | 0        | 0.0%  | 0         | 0.0%  | 0         | 0.0%   |
| mmu-mir-351-5p | X   | 50406492 | 50406515 | -      | edit | 17       | 3        | 0.3%  | 0         | 0.0%  | 0         | 0.0%   |
| mmu-mir-351-5p | X   | 50406492 | 50406515 | -      | edit | 18       | 0        | 0.0%  | 0         | 0.0%  | 0         | 0.0%   |
| mmu-mir-351-5p | X   | 50406492 | 50406515 | -      | edit | 19       | 7        | 0.6%  | 3         | 0.6%  | 0         | 0.0%   |
| mmu-mir-351-5p | X   | 50406492 | 50406515 | -      | edit | 20       | 0        | 0.0%  | 0         | 0.0%  | 0         | 0.0%   |
| mmu-mir-351-5p | X   | 50406492 | 50406515 | -      | edit | 21       | 13       | 1.0%  | 0         | 0.0%  | 0         | 0.0%   |
| mmu-mir-351-5p | X   | 50406492 | 50406515 | -      | edit | 22       | 0        | 0.0%  | 0         | 0.0%  | 0         | 0.0%   |
| EDITED         |     |          |          |        |      |          | 27       | 2.2%  | 3         | 0.6%  | 0         | 0.0%   |
| CANONICAL      |     |          |          |        |      |          | 1170     | 97.8% | 509       | 99.4% | 174       | 100.0% |
| TOTAL          |     |          |          |        |      |          | 1197     |       | 512       |       | 174       |        |

| miRNA           | Chr | Start     | Stop      | Strand | Type | Position | P7 reads | P7%   | P10 reads | P10%  | P14 reads | P14%   |
|-----------------|-----|-----------|-----------|--------|------|----------|----------|-------|-----------|-------|-----------|--------|
| mmu-mir-376b-3p | 12  | 110961718 | 110961738 | +      | edit | 1        | 0        | 0.0%  | 0         | 0.0%  | 0         | 0.0%   |
| mmu-mir-376b-3p | 12  | 110961718 | 110961738 | +      | edit | 2        | 0        | 0.0%  | 0         | 0.0%  | 0         | 0.0%   |
| mmu-mir-376b-3p | 12  | 110961718 | 110961738 | +      | edit | 3        | 0        | 0.0%  | 0         | 0.0%  | 0         | 0.0%   |
| mmu-mir-376b-3p | 12  | 110961718 | 110961738 | +      | edit | 4        | 0        | 0.0%  | 0         | 0.0%  | 0         | 0.0%   |
| mmu-mir-376b-3p | 12  | 110961718 | 110961738 | +      | edit | 5        | 0        | 0.0%  | 0         | 0.0%  | 0         | 0.0%   |
| mmu-mir-376b-3p | 12  | 110961718 | 110961738 | +      | edit | 6        | 23       | 11.6% | 4         | 13.8% | 0         | 0.0%   |
| mmu-mir-376b-3p | 12  | 110961718 | 110961738 | +      | edit | 7        | 0        | 0.0%  | 0         | 0.0%  | 0         | 0.0%   |
| mmu-mir-376b-3p | 12  | 110961718 | 110961738 | +      | edit | 8        | 0        | 0.0%  | 0         | 0.0%  | 0         | 0.0%   |
| mmu-mir-376b-3p | 12  | 110961718 | 110961738 | +      | edit | 9        | 0        | 0.0%  | 0         | 0.0%  | 0         | 0.0%   |
| mmu-mir-376b-3p | 12  | 110961718 | 110961738 | +      | edit | 10       | 0        | 0.0%  | 0         | 0.0%  | 0         | 0.0%   |
| mmu-mir-376b-3p | 12  | 110961718 | 110961738 | +      | edit | 11       | 0        | 0.0%  | 0         | 0.0%  | 0         | 0.0%   |
| mmu-mir-376b-3p | 12  | 110961718 | 110961738 | +      | edit | 12       | 0        | 0.0%  | 0         | 0.0%  | 0         | 0.0%   |
| mmu-mir-376b-3p | 12  | 110961718 | 110961738 | +      | edit | 13       | 0        | 0.0%  | 0         | 0.0%  | 0         | 0.0%   |
| mmu-mir-376b-3p | 12  | 110961718 | 110961738 | +      | edit | 14       | 0        | 0.0%  | 0         | 0.0%  | 0         | 0.0%   |
| mmu-mir-376b-3p | 12  | 110961718 | 110961738 | +      | edit | 15       | 0        | 0.0%  | 0         | 0.0%  | 0         | 0.0%   |
| mmu-mir-376b-3p | 12  | 110961718 | 110961738 | +      | edit | 16       | 0        | 0.0%  | 0         | 0.0%  | 0         | 0.0%   |
| mmu-mir-376b-3p | 12  | 110961718 | 110961738 | +      | edit | 17       | 0        | 0.0%  | 0         | 0.0%  | 0         | 0.0%   |
| mmu-mir-376b-3p | 12  | 110961718 | 110961738 | +      | edit | 18       | 0        | 0.0%  | 0         | 0.0%  | 0         | 0.0%   |
| mmu-mir-376b-3p | 12  | 110961718 | 110961738 | +      | edit | 19       | 0        | 0.0%  | 0         | 0.0%  | 0         | 0.0%   |
| mmu-mir-376b-3p | 12  | 110961718 | 110961738 | +      | edit | 20       | 0        | 0.0%  | 0         | 0.0%  | 0         | 0.0%   |
| mmu-mir-376b-3p | 12  | 110961718 | 110961738 | +      | edit | 21       | 0        | 0.0%  | 0         | 0.0%  | 0         | 0.0%   |
| mmu-mir-376b-3p | 12  | 110961718 | 110961738 | +      | edit | 22       | 0        | 0.0%  | 0         | 0.0%  | 0         | 0.0%   |
| EDITED          |     |           |           |        |      |          | 23       | 11.6% | 4         | 13.8% | 0         | 0.0%   |
| CANONICAL       |     |           |           |        |      |          | 175      | 88.4% | 25        | 86.2% | 11        | 100.0% |
| TOTAL           |     |           |           |        |      |          | 198      |       | 29        |       | 11        |        |

| miRNA          | Chr | Start    | Stop     | Strand | Type | Position | P7 reads | P7%   | P10 reads | P10%  | P14 reads | P14%  |
|----------------|-----|----------|----------|--------|------|----------|----------|-------|-----------|-------|-----------|-------|
| mmu-mir-378-3p | 18  | 61557492 | 61557512 | -      | edit | 1        | 0        | 0.0%  | 0         | 0.0%  | 0         | 0.0%  |
| mmu-mir-378-3p | 18  | 61557492 | 61557512 | -      | edit | 2        | 0        | 0.0%  | 0         | 0.0%  | 0         | 0.0%  |
| mmu-mir-378-3p | 18  | 61557492 | 61557512 | -      | edit | 3        | 0        | 0.0%  | 0         | 0.0%  | 0         | 0.0%  |
| mmu-mir-378-3p | 18  | 61557492 | 61557512 | -      | edit | 4        | 0        | 0.0%  | 0         | 0.0%  | 0         | 0.0%  |
| mmu-mir-378-3p | 18  | 61557492 | 61557512 | -      | edit | 5        | 0        | 0.0%  | 0         | 0.0%  | 0         | 0.0%  |
| mmu-mir-378-3p | 18  | 61557492 | 61557512 | -      | edit | 6        | 0        | 0.0%  | 0         | 0.0%  | 0         | 0.0%  |
| mmu-mir-378-3p | 18  | 61557492 | 61557512 | -      | edit | 7        | 0        | 0.0%  | 0         | 0.0%  | 0         | 0.0%  |
| mmu-mir-378-3p | 18  | 61557492 | 61557512 | -      | edit | 8        | 0        | 0.0%  | 0         | 0.0%  | 0         | 0.0%  |
| mmu-mir-378-3p | 18  | 61557492 | 61557512 | -      | edit | 9        | 0        | 0.0%  | 0         | 0.0%  | 0         | 0.0%  |
| mmu-mir-378-3p | 18  | 61557492 | 61557512 | -      | edit | 10       | 0        | 0.0%  | 0         | 0.0%  | 0         | 0.0%  |
| mmu-mir-378-3p | 18  | 61557492 | 61557512 | -      | edit | 11       | 0        | 0.0%  | 0         | 0.0%  | 0         | 0.0%  |
| mmu-mir-378-3p | 18  | 61557492 | 61557512 | -      | edit | 12       | 0        | 0.0%  | 0         | 0.0%  | 0         | 0.0%  |
| mmu-mir-378-3p | 18  | 61557492 | 61557512 | -      | edit | 13       | 0        | 0.0%  | 0         | 0.0%  | 0         | 0.0%  |
| mmu-mir-378-3p | 18  | 61557492 | 61557512 | -      | edit | 14       | 0        | 0.0%  | 0         | 0.0%  | 0         | 0.0%  |
| mmu-mir-378-3p | 18  | 61557492 | 61557512 | -      | edit | 15       | 9        | 0.4%  | 0         | 0.0%  | 0         | 0.0%  |
| mmu-mir-378-3p | 18  | 61557492 | 61557512 | -      | edit | 16       | 10       | 0.4%  | 9         | 1.3%  | 3         | 0.5%  |
| mmu-mir-378-3p | 18  | 61557492 | 61557512 | -      | edit | 17       | 0        | 0.0%  | 0         | 0.0%  | 0         | 0.0%  |
| mmu-mir-378-3p | 18  | 61557492 | 61557512 | -      | edit | 18       | 0        | 0.0%  | 0         | 0.0%  | 0         | 0.0%  |
| mmu-mir-378-3p | 18  | 61557492 | 61557512 | -      | edit | 19       | 0        | 0.0%  | 4         | 0.6%  | 0         | 0.0%  |
| mmu-mir-378-3p | 18  | 61557492 | 61557512 | -      | edit | 20       | 0        | 0.0%  | 0         | 0.0%  | 0         | 0.0%  |
| mmu-mir-378-3p | 18  | 61557492 | 61557512 | -      | edit | 21       | 0        | 0.0%  | 0         | 0.0%  | 0         | 0.0%  |
| mmu-mir-378-3p | 18  | 61557492 | 61557512 | -      | edit | 22       | 0        | 0.0%  | 0         | 0.0%  | 0         | 0.0%  |
| EDITED         |     |          |          |        |      |          | 19       | 0.8%  | 13        | 1.9%  | 3         | 0.5%  |
| CANONICAL      |     |          |          |        |      |          | 2316     | 99.2% | 654       | 98.1% | 594       | 99.5% |
| TOTAL          |     |          |          |        |      |          | 2335     |       | 667       |       | 597       |       |

| miRNA          | Chr | Start     | Stop      | Strand | Type    | Position | P7 reads | P7%   | P10 reads | P10%  | P14 reads | P14%  |
|----------------|-----|-----------|-----------|--------|---------|----------|----------|-------|-----------|-------|-----------|-------|
| mmu-mir-379-5p | 12  | 110947275 | 110947295 | +      | 3' Edit | 3'       | 27       | 0.6%  | 0         | 0.0%  | 7         | 0.9%  |
| mmu-mir-379-5p | 12  | 110947275 | 110947295 | +      | Indel   | 21       | 3        | 0.1%  | 0         | 0.0%  | 0         | 0.0%  |
| mmu-mir-379-5p | 12  | 110947275 | 110947295 | +      | edit    | 1        | 0        | 0.0%  | 0         | 0.0%  | 0         | 0.0%  |
| mmu-mir-379-5p | 12  | 110947275 | 110947295 | +      | edit    | 2        | 0        | 0.0%  | 0         | 0.0%  | 0         | 0.0%  |
| mmu-mir-379-5p | 12  | 110947275 | 110947295 | +      | edit    | 3        | 0        | 0.0%  | 0         | 0.0%  | 0         | 0.0%  |
| mmu-mir-379-5p | 12  | 110947275 | 110947295 | +      | edit    | 4        | 0        | 0.0%  | 0         | 0.0%  | 0         | 0.0%  |
| mmu-mir-379-5p | 12  | 110947275 | 110947295 | +      | edit    | 5        | 0        | 0.0%  | 0         | 0.0%  | 0         | 0.0%  |
| mmu-mir-379-5p | 12  | 110947275 | 110947295 | +      | edit    | 6        | 0        | 0.0%  | 0         | 0.0%  | 0         | 0.0%  |
| mmu-mir-379-5p | 12  | 110947275 | 110947295 | +      | edit    | 7        | 0        | 0.0%  | 0         | 0.0%  | 0         | 0.0%  |
| mmu-mir-379-5p | 12  | 110947275 | 110947295 | +      | edit    | 8        | 0        | 0.0%  | 0         | 0.0%  | 0         | 0.0%  |
| mmu-mir-379-5p | 12  | 110947275 | 110947295 | +      | edit    | 9        | 0        | 0.0%  | 0         | 0.0%  | 0         | 0.0%  |
| mmu-mir-379-5p | 12  | 110947275 | 110947295 | +      | edit    | 10       | 0        | 0.0%  | 0         | 0.0%  | 0         | 0.0%  |
| mmu-mir-379-5p | 12  | 110947275 | 110947295 | +      | edit    | 11       | 0        | 0.0%  | 0         | 0.0%  | 0         | 0.0%  |
| mmu-mir-379-5p | 12  | 110947275 | 110947295 | +      | edit    | 12       | 0        | 0.0%  | 0         | 0.0%  | 0         | 0.0%  |
| mmu-mir-379-5p | 12  | 110947275 | 110947295 | +      | edit    | 13       | 0        | 0.0%  | 0         | 0.0%  | 0         | 0.0%  |
| mmu-mir-379-5p | 12  | 110947275 | 110947295 | +      | edit    | 14       | 0        | 0.0%  | 0         | 0.0%  | 0         | 0.0%  |
| mmu-mir-379-5p | 12  | 110947275 | 110947295 | +      | edit    | 15       | 0        | 0.0%  | 0         | 0.0%  | 0         | 0.0%  |
| mmu-mir-379-5p | 12  | 110947275 | 110947295 | +      | edit    | 16       | 0        | 0.0%  | 0         | 0.0%  | 0         | 0.0%  |
| mmu-mir-379-5p | 12  | 110947275 | 110947295 | +      | edit    | 17       | 0        | 0.0%  | 0         | 0.0%  | 0         | 0.0%  |
| mmu-mir-379-5p | 12  | 110947275 | 110947295 | +      | edit    | 18       | 0        | 0.0%  | 0         | 0.0%  | 0         | 0.0%  |
| mmu-mir-379-5p | 12  | 110947275 | 110947295 | +      | edit    | 19       | 0        | 0.0%  | 4         | 0.2%  | 0         | 0.0%  |
| mmu-mir-379-5p | 12  | 110947275 | 110947295 | +      | edit    | 20       | 0        | 0.0%  | 0         | 0.0%  | 0         | 0.0%  |
| mmu-mir-379-5p | 12  | 110947275 | 110947295 | +      | edit    | 21       | 4        | 0.1%  | 5         | 0.3%  | 4         | 0.5%  |
| mmu-mir-379-5p | 12  | 110947275 | 110947295 | +      | edit    | 22       | 0        | 0.0%  | 0         | 0.0%  | 0         | 0.0%  |
| EDITED         |     |           |           |        |         |          | 34       | 0.8%  | 9         | 0.5%  | 11        | 1.5%  |
| CANONICAL      |     |           |           |        |         |          | 4497     | 99.2% | 1794      | 99.5% | 738       | 98.5% |
| TOTAL          |     |           |           |        |         |          | 4531     |       | 1803      |       | 749       |       |

| miRNA          | Chr | Start     | Stop      | Strand | Type | Position | P7 reads | P7%   | P10 reads | P10%  | P14 reads | P14%   |
|----------------|-----|-----------|-----------|--------|------|----------|----------|-------|-----------|-------|-----------|--------|
| mmu-mir-382-3p | 12  | 110972029 | 110972050 | +      | edit | 1        | 0        | 0.0%  | 0         | 0.0%  | 0         | 0.0%   |
| mmu-mir-382-3p | 12  | 110972029 | 110972050 | +      | edit | 2        | 0        | 0.0%  | 0         | 0.0%  | 0         | 0.0%   |
| mmu-mir-382-3p | 12  | 110972029 | 110972050 | +      | edit | 3        | 0        | 0.0%  | 0         | 0.0%  | 0         | 0.0%   |
| mmu-mir-382-3p | 12  | 110972029 | 110972050 | +      | edit | 4        | 0        | 0.0%  | 0         | 0.0%  | 0         | 0.0%   |
| mmu-mir-382-3p | 12  | 110972029 | 110972050 | +      | edit | 5        | 0        | 0.0%  | 0         | 0.0%  | 0         | 0.0%   |
| mmu-mir-382-3p | 12  | 110972029 | 110972050 | +      | edit | 6        | 0        | 0.0%  | 0         | 0.0%  | 0         | 0.0%   |
| mmu-mir-382-3p | 12  | 110972029 | 110972050 | +      | edit | 7        | 0        | 0.0%  | 0         | 0.0%  | 0         | 0.0%   |
| mmu-mir-382-3p | 12  | 110972029 | 110972050 | +      | edit | 8        | 0        | 0.0%  | 0         | 0.0%  | 0         | 0.0%   |
| mmu-mir-382-3p | 12  | 110972029 | 110972050 | +      | edit | 9        | 0        | 0.0%  | 0         | 0.0%  | 0         | 0.0%   |
| mmu-mir-382-3p | 12  | 110972029 | 110972050 | +      | edit | 10       | 0        | 0.0%  | 0         | 0.0%  | 0         | 0.0%   |
| mmu-mir-382-3p | 12  | 110972029 | 110972050 | +      | edit | 11       | 0        | 0.0%  | 0         | 0.0%  | 0         | 0.0%   |
| mmu-mir-382-3p | 12  | 110972029 | 110972050 | +      | edit | 12       | 0        | 0.0%  | 0         | 0.0%  | 0         | 0.0%   |
| mmu-mir-382-3p | 12  | 110972029 | 110972050 | +      | edit | 13       | 0        | 0.0%  | 3         | 0.9%  | 0         | 0.0%   |
| mmu-mir-382-3p | 12  | 110972029 | 110972050 | +      | edit | 14       | 0        | 0.0%  | 0         | 0.0%  | 0         | 0.0%   |
| mmu-mir-382-3p | 12  | 110972029 | 110972050 | +      | edit | 15       | 0        | 0.0%  | 0         | 0.0%  | 0         | 0.0%   |
| mmu-mir-382-3p | 12  | 110972029 | 110972050 | +      | edit | 16       | 0        | 0.0%  | 0         | 0.0%  | 0         | 0.0%   |
| mmu-mir-382-3p | 12  | 110972029 | 110972050 | +      | edit | 17       | 8        | 0.7%  | 0         | 0.0%  | 0         | 0.0%   |
| mmu-mir-382-3p | 12  | 110972029 | 110972050 | +      | edit | 18       | 0        | 0.0%  | 0         | 0.0%  | 0         | 0.0%   |
| mmu-mir-382-3p | 12  | 110972029 | 110972050 | +      | edit | 19       | 0        | 0.0%  | 0         | 0.0%  | 0         | 0.0%   |
| mmu-mir-382-3p | 12  | 110972029 | 110972050 | +      | edit | 20       | 0        | 0.0%  | 0         | 0.0%  | 0         | 0.0%   |
| mmu-mir-382-3p | 12  | 110972029 | 110972050 | +      | edit | 21       | 0        | 0.0%  | 0         | 0.0%  | 0         | 0.0%   |
| mmu-mir-382-3p | 12  | 110972029 | 110972050 | +      | edit | 22       | 0        | 0.0%  | 0         | 0.0%  | 0         | 0.0%   |
| EDITED         |     |           |           |        |      |          | 8        | 0.7%  | 3         | 0.9%  | 0         | 0.0%   |
| CANONICAL      |     |           |           |        |      |          | 1131     | 99.3% | 349       | 99.1% | 200       | 100.0% |
| TOTAL          |     |           |           |        |      |          | 1139     |       | 352       |       | 200       |        |

| miRNA          | Chr | Start     | Stop      | Strand | Type | Position | P7 reads | P7%   | P10 reads | P10%  | P14 reads | P14%   |
|----------------|-----|-----------|-----------|--------|------|----------|----------|-------|-----------|-------|-----------|--------|
| mmu-mir-382-5p | 12  | 110971991 | 110972012 | +      | edit | 1        | 0        | 0.0%  | 0         | 0.0%  | 0         | 0.0%   |
| mmu-mir-382-5p | 12  | 110971991 | 110972012 | +      | edit | 2        | 0        | 0.0%  | 0         | 0.0%  | 0         | 0.0%   |
| mmu-mir-382-5p | 12  | 110971991 | 110972012 | +      | edit | 3        | 0        | 0.0%  | 0         | 0.0%  | 0         | 0.0%   |
| mmu-mir-382-5p | 12  | 110971991 | 110972012 | +      | edit | 4        | 0        | 0.0%  | 0         | 0.0%  | 0         | 0.0%   |
| mmu-mir-382-5p | 12  | 110971991 | 110972012 | +      | edit | 5        | 0        | 0.0%  | 0         | 0.0%  | 0         | 0.0%   |
| mmu-mir-382-5p | 12  | 110971991 | 110972012 | +      | edit | 6        | 0        | 0.0%  | 0         | 0.0%  | 0         | 0.0%   |
| mmu-mir-382-5p | 12  | 110971991 | 110972012 | +      | edit | 7        | 0        | 0.0%  | 0         | 0.0%  | 0         | 0.0%   |
| mmu-mir-382-5p | 12  | 110971991 | 110972012 | +      | edit | 8        | 0        | 0.0%  | 0         | 0.0%  | 0         | 0.0%   |
| mmu-mir-382-5p | 12  | 110971991 | 110972012 | +      | edit | 9        | 0        | 0.0%  | 0         | 0.0%  | 0         | 0.0%   |
| mmu-mir-382-5p | 12  | 110971991 | 110972012 | +      | edit | 10       | 0        | 0.0%  | 0         | 0.0%  | 0         | 0.0%   |
| mmu-mir-382-5p | 12  | 110971991 | 110972012 | +      | edit | 11       | 0        | 0.0%  | 0         | 0.0%  | 0         | 0.0%   |
| mmu-mir-382-5p | 12  | 110971991 | 110972012 | +      | edit | 12       | 0        | 0.0%  | 0         | 0.0%  | 0         | 0.0%   |
| mmu-mir-382-5p | 12  | 110971991 | 110972012 | +      | edit | 13       | 0        | 0.0%  | 0         | 0.0%  | 0         | 0.0%   |
| mmu-mir-382-5p | 12  | 110971991 | 110972012 | +      | edit | 14       | 0        | 0.0%  | 0         | 0.0%  | 0         | 0.0%   |
| mmu-mir-382-5p | 12  | 110971991 | 110972012 | +      | edit | 15       | 22       | 0.8%  | 8         | 0.9%  | 0         | 0.0%   |
| mmu-mir-382-5p | 12  | 110971991 | 110972012 | +      | edit | 16       | 0        | 0.0%  | 0         | 0.0%  | 0         | 0.0%   |
| mmu-mir-382-5p | 12  | 110971991 | 110972012 | +      | edit | 17       | 0        | 0.0%  | 0         | 0.0%  | 0         | 0.0%   |
| mmu-mir-382-5p | 12  | 110971991 | 110972012 | +      | edit | 18       | 0        | 0.0%  | 0         | 0.0%  | 0         | 0.0%   |
| mmu-mir-382-5p | 12  | 110971991 | 110972012 | +      | edit | 19       | 3        | 0.1%  | 0         | 0.0%  | 0         | 0.0%   |
| mmu-mir-382-5p | 12  | 110971991 | 110972012 | +      | edit | 20       | 0        | 0.0%  | 0         | 0.0%  | 0         | 0.0%   |
| mmu-mir-382-5p | 12  | 110971991 | 110972012 | +      | edit | 21       | 0        | 0.0%  | 0         | 0.0%  | 0         | 0.0%   |
| mmu-mir-382-5p | 12  | 110971991 | 110972012 | +      | edit | 22       | 3        | 0.1%  | 0         | 0.0%  | 0         | 0.0%   |
| EDITED         |     |           |           |        |      |          | 28       | 1.0%  | 8         | 0.9%  | 0         | 0.0%   |
| CANONICAL      |     |           |           |        |      |          | 2846     | 99.0% | 902       | 99.1% | 397       | 100.0% |
| TOTAL          |     |           |           |        |      |          | 2874     |       | 910       |       | 397       |        |

| miRNA          | Chr | Start     | Stop      | Strand | Type | Position | P7 reads | P7%   | P10 reads | P10%   | P14 reads | P14%   |
|----------------|-----|-----------|-----------|--------|------|----------|----------|-------|-----------|--------|-----------|--------|
| mmu-mir-409-3p | 12  | 110981414 | 110981435 | +      | edit | 1        | 0        | 0.0%  | 0         | 0.0%   | 0         | 0.0%   |
| mmu-mir-409-3p | 12  | 110981414 | 110981435 | +      | edit | 2        | 0        | 0.0%  | 0         | 0.0%   | 0         | 0.0%   |
| mmu-mir-409-3p | 12  | 110981414 | 110981435 | +      | edit | 3        | 0        | 0.0%  | 0         | 0.0%   | 0         | 0.0%   |
| mmu-mir-409-3p | 12  | 110981414 | 110981435 | +      | edit | 4        | 0        | 0.0%  | 0         | 0.0%   | 0         | 0.0%   |
| mmu-mir-409-3p | 12  | 110981414 | 110981435 | +      | edit | 5        | 0        | 0.0%  | 0         | 0.0%   | 0         | 0.0%   |
| mmu-mir-409-3p | 12  | 110981414 | 110981435 | +      | edit | 6        | 0        | 0.0%  | 0         | 0.0%   | 0         | 0.0%   |
| mmu-mir-409-3p | 12  | 110981414 | 110981435 | +      | edit | 7        | 0        | 0.0%  | 0         | 0.0%   | 0         | 0.0%   |
| mmu-mir-409-3p | 12  | 110981414 | 110981435 | +      | edit | 8        | 0        | 0.0%  | 0         | 0.0%   | 0         | 0.0%   |
| mmu-mir-409-3p | 12  | 110981414 | 110981435 | +      | edit | 9        | 0        | 0.0%  | 0         | 0.0%   | 0         | 0.0%   |
| mmu-mir-409-3p | 12  | 110981414 | 110981435 | +      | edit | 10       | 0        | 0.0%  | 0         | 0.0%   | 0         | 0.0%   |
| mmu-mir-409-3p | 12  | 110981414 | 110981435 | +      | edit | 11       | 0        | 0.0%  | 0         | 0.0%   | 0         | 0.0%   |
| mmu-mir-409-3p | 12  | 110981414 | 110981435 | +      | edit | 12       | 0        | 0.0%  | 0         | 0.0%   | 0         | 0.0%   |
| mmu-mir-409-3p | 12  | 110981414 | 110981435 | +      | edit | 13       | 0        | 0.0%  | 0         | 0.0%   | 0         | 0.0%   |
| mmu-mir-409-3p | 12  | 110981414 | 110981435 | +      | edit | 14       | 0        | 0.0%  | 0         | 0.0%   | 0         | 0.0%   |
| mmu-mir-409-3p | 12  | 110981414 | 110981435 | +      | edit | 15       | 0        | 0.0%  | 0         | 0.0%   | 0         | 0.0%   |
| mmu-mir-409-3p | 12  | 110981414 | 110981435 | +      | edit | 16       | 0        | 0.0%  | 0         | 0.0%   | 0         | 0.0%   |
| mmu-mir-409-3p | 12  | 110981414 | 110981435 | +      | edit | 17       | 0        | 0.0%  | 0         | 0.0%   | 0         | 0.0%   |
| mmu-mir-409-3p | 12  | 110981414 | 110981435 | +      | edit | 18       | 0        | 0.0%  | 0         | 0.0%   | 0         | 0.0%   |
| mmu-mir-409-3p | 12  | 110981414 | 110981435 | +      | edit | 19       | 7        | 1.9%  | 0         | 0.0%   | 0         | 0.0%   |
| mmu-mir-409-3p | 12  | 110981414 | 110981435 | +      | edit | 20       | 0        | 0.0%  | 0         | 0.0%   | 0         | 0.0%   |
| mmu-mir-409-3p | 12  | 110981414 | 110981435 | +      | edit | 21       | 0        | 0.0%  | 0         | 0.0%   | 0         | 0.0%   |
| mmu-mir-409-3p | 12  | 110981414 | 110981435 | +      | edit | 22       | 0        | 0.0%  | 0         | 0.0%   | 0         | 0.0%   |
| EDITED         |     |           |           |        |      |          | 7        | 1.9%  | 0         | 0.0%   | 0         | 0.0%   |
| CANONICAL      |     |           |           |        |      |          | 370      | 98.1% | 89        | 100.0% | 28        | 100.0% |
| TOTAL          |     |           |           |        |      |          | 377      |       | 89        |        | 28        |        |

| miRNA          | Chr | Start     | Stop      | Strand | Type | Position | P7 reads | P7%   | P10 reads | P10%   | P14 reads | P14%   |
|----------------|-----|-----------|-----------|--------|------|----------|----------|-------|-----------|--------|-----------|--------|
| mmu-mir-411-5p | 12  | 110948400 | 110948420 | +      | edit | 1        | 0        | 0.0%  | 0         | 0.0%   | 0         | 0.0%   |
| mmu-mir-411-5p | 12  | 110948400 | 110948420 | +      | edit | 2        | 0        | 0.0%  | 0         | 0.0%   | 0         | 0.0%   |
| mmu-mir-411-5p | 12  | 110948400 | 110948420 | +      | edit | 3        | 0        | 0.0%  | 0         | 0.0%   | 0         | 0.0%   |
| mmu-mir-411-5p | 12  | 110948400 | 110948420 | +      | edit | 4        | 0        | 0.0%  | 0         | 0.0%   | 0         | 0.0%   |
| mmu-mir-411-5p | 12  | 110948400 | 110948420 | +      | edit | 5        | 9        | 0.7%  | 0         | 0.0%   | 0         | 0.0%   |
| mmu-mir-411-5p | 12  | 110948400 | 110948420 | +      | edit | 6        | 0        | 0.0%  | 0         | 0.0%   | 0         | 0.0%   |
| mmu-mir-411-5p | 12  | 110948400 | 110948420 | +      | edit | 7        | 0        | 0.0%  | 0         | 0.0%   | 0         | 0.0%   |
| mmu-mir-411-5p | 12  | 110948400 | 110948420 | +      | edit | 8        | 0        | 0.0%  | 0         | 0.0%   | 0         | 0.0%   |
| mmu-mir-411-5p | 12  | 110948400 | 110948420 | +      | edit | 9        | 0        | 0.0%  | 0         | 0.0%   | 0         | 0.0%   |
| mmu-mir-411-5p | 12  | 110948400 | 110948420 | +      | edit | 10       | 0        | 0.0%  | 0         | 0.0%   | 0         | 0.0%   |
| mmu-mir-411-5p | 12  | 110948400 | 110948420 | +      | edit | 11       | 0        | 0.0%  | 0         | 0.0%   | 0         | 0.0%   |
| mmu-mir-411-5p | 12  | 110948400 | 110948420 | +      | edit | 12       | 0        | 0.0%  | 0         | 0.0%   | 0         | 0.0%   |
| mmu-mir-411-5p | 12  | 110948400 | 110948420 | +      | edit | 13       | 0        | 0.0%  | 0         | 0.0%   | 0         | 0.0%   |
| mmu-mir-411-5p | 12  | 110948400 | 110948420 | +      | edit | 14       | 0        | 0.0%  | 0         | 0.0%   | 0         | 0.0%   |
| mmu-mir-411-5p | 12  | 110948400 | 110948420 | +      | edit | 15       | 0        | 0.0%  | 0         | 0.0%   | 0         | 0.0%   |
| mmu-mir-411-5p | 12  | 110948400 | 110948420 | +      | edit | 16       | 0        | 0.0%  | 0         | 0.0%   | 0         | 0.0%   |
| mmu-mir-411-5p | 12  | 110948400 | 110948420 | +      | edit | 17       | 0        | 0.0%  | 0         | 0.0%   | 0         | 0.0%   |
| mmu-mir-411-5p | 12  | 110948400 | 110948420 | +      | edit | 18       | 0        | 0.0%  | 0         | 0.0%   | 0         | 0.0%   |
| mmu-mir-411-5p | 12  | 110948400 | 110948420 | +      | edit | 19       | 0        | 0.0%  | 0         | 0.0%   | 0         | 0.0%   |
| mmu-mir-411-5p | 12  | 110948400 | 110948420 | +      | edit | 20       | 0        | 0.0%  | 0         | 0.0%   | 0         | 0.0%   |
| mmu-mir-411-5p | 12  | 110948400 | 110948420 | +      | edit | 21       | 0        | 0.0%  | 0         | 0.0%   | 0         | 0.0%   |
| mmu-mir-411-5p | 12  | 110948400 | 110948420 | +      | edit | 22       | 0        | 0.0%  | 0         | 0.0%   | 0         | 0.0%   |
| EDITED         |     |           |           |        |      |          | 9        | 0.7%  | 0         | 0.0%   | 0         | 0.0%   |
| CANONICAL      |     |           |           |        |      |          | 1289     | 99.3% | 473       | 100.0% | 185       | 100.0% |
| TOTAL          |     |           |           |        |      |          | 1298     |       | 473       |        | 185       |        |



| miRNA          | Chr | Start    | Stop     | Strand | Type | Position | P7 reads | P7%   | P10 reads | P10%  | P14 reads | P14%   |
|----------------|-----|----------|----------|--------|------|----------|----------|-------|-----------|-------|-----------|--------|
| mmu-mir-423-3p | 11  | 76891588 | 76891610 | -      | edit | 1        | 0        | 0.0%  | 0         | 0.0%  | 0         | 0.0%   |
| mmu-mir-423-3p | 11  | 76891588 | 76891610 | -      | edit | 2        | 0        | 0.0%  | 0         | 0.0%  | 0         | 0.0%   |
| mmu-mir-423-3p | 11  | 76891588 | 76891610 | -      | edit | 3        | 0        | 0.0%  | 0         | 0.0%  | 0         | 0.0%   |
| mmu-mir-423-3p | 11  | 76891588 | 76891610 | -      | edit | 4        | 0        | 0.0%  | 0         | 0.0%  | 0         | 0.0%   |
| mmu-mir-423-3p | 11  | 76891588 | 76891610 | -      | edit | 5        | 0        | 0.0%  | 0         | 0.0%  | 0         | 0.0%   |
| mmu-mir-423-3p | 11  | 76891588 | 76891610 | -      | edit | 6        | 0        | 0.0%  | 0         | 0.0%  | 0         | 0.0%   |
| mmu-mir-423-3p | 11  | 76891588 | 76891610 | -      | edit | 7        | 0        | 0.0%  | 0         | 0.0%  | 0         | 0.0%   |
| mmu-mir-423-3p | 11  | 76891588 | 76891610 | -      | edit | 8        | 0        | 0.0%  | 0         | 0.0%  | 0         | 0.0%   |
| mmu-mir-423-3p | 11  | 76891588 | 76891610 | -      | edit | 9        | 0        | 0.0%  | 0         | 0.0%  | 0         | 0.0%   |
| mmu-mir-423-3p | 11  | 76891588 | 76891610 | -      | edit | 10       | 0        | 0.0%  | 0         | 0.0%  | 0         | 0.0%   |
| mmu-mir-423-3p | 11  | 76891588 | 76891610 | -      | edit | 11       | 0        | 0.0%  | 0         | 0.0%  | 0         | 0.0%   |
| mmu-mir-423-3p | 11  | 76891588 | 76891610 | -      | edit | 12       | 0        | 0.0%  | 0         | 0.0%  | 0         | 0.0%   |
| mmu-mir-423-3p | 11  | 76891588 | 76891610 | -      | edit | 13       | 0        | 0.0%  | 0         | 0.0%  | 0         | 0.0%   |
| mmu-mir-423-3p | 11  | 76891588 | 76891610 | -      | edit | 14       | 0        | 0.0%  | 0         | 0.0%  | 0         | 0.0%   |
| mmu-mir-423-3p | 11  | 76891588 | 76891610 | -      | edit | 15       | 0        | 0.0%  | 0         | 0.0%  | 0         | 0.0%   |
| mmu-mir-423-3p | 11  | 76891588 | 76891610 | -      | edit | 16       | 4        | 0.6%  | 7         | 1.6%  | 0         | 0.0%   |
| mmu-mir-423-3p | 11  | 76891588 | 76891610 | -      | edit | 17       | 0        | 0.0%  | 0         | 0.0%  | 0         | 0.0%   |
| mmu-mir-423-3p | 11  | 76891588 | 76891610 | -      | edit | 18       | 3        | 0.5%  | 0         | 0.0%  | 0         | 0.0%   |
| mmu-mir-423-3p | 11  | 76891588 | 76891610 | -      | edit | 19       | 0        | 0.0%  | 0         | 0.0%  | 0         | 0.0%   |
| mmu-mir-423-3p | 11  | 76891588 | 76891610 | -      | edit | 20       | 3        | 0.5%  | 0         | 0.0%  | 0         | 0.0%   |
| mmu-mir-423-3p | 11  | 76891588 | 76891610 | -      | edit | 21       | 0        | 0.0%  | 0         | 0.0%  | 0         | 0.0%   |
| mmu-mir-423-3p | 11  | 76891588 | 76891610 | -      | edit | 22       | 0        | 0.0%  | 0         | 0.0%  | 0         | 0.0%   |
| EDITED         |     |          |          |        |      |          | 10       | 1.6%  | 7         | 1.6%  | 0         | 0.0%   |
| CANONICAL      |     |          |          |        |      |          | 627      | 98.4% | 430       | 98.4% | 266       | 100.0% |
| TOTAL          |     |          |          |        |      |          | 637      |       | 437       |       | 266       |        |

| miRNA          | Chr | Start    | Stop     | Strand | Type     | Position | P7 reads | P7%   | P10 reads | P10%  | P14 reads | P14%  |
|----------------|-----|----------|----------|--------|----------|----------|----------|-------|-----------|-------|-----------|-------|
| mmu-mir-423-5p | 11  | 76891624 | 76891646 | -      | 5' Edit  | 5'       | 9        | 0.0%  | 0         | 0.0%  | 9         | 0.1%  |
| mmu-mir-423-5p | 11  | 76891624 | 76891646 | -      | 5' Indel | 5'       | 9        | 0.0%  | 0         | 0.0%  | 0         | 0.0%  |
| mmu-mir-423-5p | 11  | 76891624 | 76891646 | -      | Indel    | 21       | 17       | 0.0%  | 3         | 0.0%  | 9         | 0.1%  |
| mmu-mir-423-5p | 11  | 76891624 | 76891646 | -      | Indel    | 22       | 15       | 0.0%  | 0         | 0.0%  | 10        | 0.1%  |
| mmu-mir-423-5p | 11  | 76891624 | 76891646 | -      | Indel    | 23       | 0        | 0.0%  | 0         | 0.0%  | 3         | 0.0%  |
| mmu-mir-423-5p | 11  | 76891624 | 76891646 | -      | edit     | 1        | 0        | 0.0%  | 0         | 0.0%  | 0         | 0.0%  |
| mmu-mir-423-5p | 11  | 76891624 | 76891646 | -      | edit     | 2        | 0        | 0.0%  | 0         | 0.0%  | 0         | 0.0%  |
| mmu-mir-423-5p | 11  | 76891624 | 76891646 | -      | edit     | 3        | 0        | 0.0%  | 0         | 0.0%  | 0         | 0.0%  |
| mmu-mir-423-5p | 11  | 76891624 | 76891646 | -      | edit     | 4        | 5        | 0.0%  | 0         | 0.0%  | 4         | 0.0%  |
| mmu-mir-423-5p | 11  | 76891624 | 76891646 | -      | edit     | 5        | 11       | 0.0%  | 9         | 0.0%  | 3         | 0.0%  |
| mmu-mir-423-5p | 11  | 76891624 | 76891646 | -      | edit     | 6        | 4        | 0.0%  | 0         | 0.0%  | 0         | 0.0%  |
| mmu-mir-423-5p | 11  | 76891624 | 76891646 | -      | edit     | 7        | 0        | 0.0%  | 0         | 0.0%  | 0         | 0.0%  |
| mmu-mir-423-5p | 11  | 76891624 | 76891646 | -      | edit     | 8        | 27       | 0.1%  | 11        | 0.0%  | 10        | 0.1%  |
| mmu-mir-423-5p | 11  | 76891624 | 76891646 | -      | edit     | 9        | 6        | 0.0%  | 10        | 0.0%  | 0         | 0.0%  |
| mmu-mir-423-5p | 11  | 76891624 | 76891646 | -      | edit     | 10       | 0        | 0.0%  | 0         | 0.0%  | 0         | 0.0%  |
| mmu-mir-423-5p | 11  | 76891624 | 76891646 | -      | edit     | 11       | 0        | 0.0%  | 0         | 0.0%  | 0         | 0.0%  |
| mmu-mir-423-5p | 11  | 76891624 | 76891646 | -      | edit     | 12       | 0        | 0.0%  | 0         | 0.0%  | 0         | 0.0%  |
| mmu-mir-423-5p | 11  | 76891624 | 76891646 | -      | edit     | 13       | 29       | 0.1%  | 44        | 0.2%  | 27        | 0.2%  |
| mmu-mir-423-5p | 11  | 76891624 | 76891646 | -      | edit     | 14       | 0        | 0.0%  | 0         | 0.0%  | 0         | 0.0%  |
| mmu-mir-423-5p | 11  | 76891624 | 76891646 | -      | edit     | 15       | 121      | 0.3%  | 65        | 0.3%  | 102       | 0.7%  |
| mmu-mir-423-5p | 11  | 76891624 | 76891646 | -      | edit     | 16       | 50       | 0.1%  | 66        | 0.3%  | 20        | 0.1%  |
| mmu-mir-423-5p | 11  | 76891624 | 76891646 | -      | edit     | 17       | 98       | 0.3%  | 303       | 1.3%  | 59        | 0.4%  |
| mmu-mir-423-5p | 11  | 76891624 | 76891646 | -      | edit     | 18       | 31       | 0.1%  | 24        | 0.1%  | 5         | 0.0%  |
| mmu-mir-423-5p | 11  | 76891624 | 76891646 | -      | edit     | 19       | 296      | 0.8%  | 366       | 1.6%  | 109       | 0.7%  |
| mmu-mir-423-5p | 11  | 76891624 | 76891646 | -      | edit     | 20       | 394      | 1.1%  | 201       | 0.9%  | 250       | 1.6%  |
| mmu-mir-423-5p | 11  | 76891624 | 76891646 | -      | edit     | 21       | 190      | 0.5%  | 44        | 0.2%  | 98        | 0.6%  |
| mmu-mir-423-5p | 11  | 76891624 | 76891646 | -      | edit     | 22       | 57       | 0.2%  | 12        | 0.1%  | 24        | 0.2%  |
| mmu-mir-423-5p | 11  | 76891624 | 76891646 | -      | edit     | 23       | 5        | 0.0%  | 0         | 0.0%  | 0         | 0.0%  |
| EDITED         |     |          |          |        |          |          | 1373     | 3.7%  | 1158      | 5.0%  | 742       | 4.8%  |
| CANONICAL      |     |          |          |        |          |          | 35295    | 96.3% | 21790     | 95.0% | 14764     | 95.2% |
| TOTAL          |     |          |          |        |          |          | 36668    |       | 22948     |       | 15506     |       |

| miRNA          | Chr | Start     | Stop      | Strand | Type | Position | P7 reads | P7%   | P10 reads | P10%   | P14 reads | P14%   |
|----------------|-----|-----------|-----------|--------|------|----------|----------|-------|-----------|--------|-----------|--------|
| mmu-mir-425-5p | 9   | 108471120 | 108471142 | +      | edit | 1        | 0        | 0.0%  | 0         | 0.0%   | 0         | 0.0%   |
| mmu-mir-425-5p | 9   | 108471120 | 108471142 | +      | edit | 2        | 0        | 0.0%  | 0         | 0.0%   | 0         | 0.0%   |
| mmu-mir-425-5p | 9   | 108471120 | 108471142 | +      | edit | 3        | 0        | 0.0%  | 0         | 0.0%   | 0         | 0.0%   |
| mmu-mir-425-5p | 9   | 108471120 | 108471142 | +      | edit | 4        | 0        | 0.0%  | 0         | 0.0%   | 0         | 0.0%   |
| mmu-mir-425-5p | 9   | 108471120 | 108471142 | +      | edit | 5        | 0        | 0.0%  | 0         | 0.0%   | 0         | 0.0%   |
| mmu-mir-425-5p | 9   | 108471120 | 108471142 | +      | edit | 6        | 0        | 0.0%  | 0         | 0.0%   | 0         | 0.0%   |
| mmu-mir-425-5p | 9   | 108471120 | 108471142 | +      | edit | 7        | 0        | 0.0%  | 0         | 0.0%   | 0         | 0.0%   |
| mmu-mir-425-5p | 9   | 108471120 | 108471142 | +      | edit | 8        | 0        | 0.0%  | 0         | 0.0%   | 0         | 0.0%   |
| mmu-mir-425-5p | 9   | 108471120 | 108471142 | +      | edit | 9        | 0        | 0.0%  | 0         | 0.0%   | 0         | 0.0%   |
| mmu-mir-425-5p | 9   | 108471120 | 108471142 | +      | edit | 10       | 0        | 0.0%  | 0         | 0.0%   | 0         | 0.0%   |
| mmu-mir-425-5p | 9   | 108471120 | 108471142 | +      | edit | 11       | 0        | 0.0%  | 0         | 0.0%   | 0         | 0.0%   |
| mmu-mir-425-5p | 9   | 108471120 | 108471142 | +      | edit | 12       | 0        | 0.0%  | 0         | 0.0%   | 0         | 0.0%   |
| mmu-mir-425-5p | 9   | 108471120 | 108471142 | +      | edit | 13       | 0        | 0.0%  | 0         | 0.0%   | 0         | 0.0%   |
| mmu-mir-425-5p | 9   | 108471120 | 108471142 | +      | edit | 14       | 0        | 0.0%  | 0         | 0.0%   | 0         | 0.0%   |
| mmu-mir-425-5p | 9   | 108471120 | 108471142 | +      | edit | 15       | 0        | 0.0%  | 0         | 0.0%   | 0         | 0.0%   |
| mmu-mir-425-5p | 9   | 108471120 | 108471142 | +      | edit | 16       | 0        | 0.0%  | 0         | 0.0%   | 0         | 0.0%   |
| mmu-mir-425-5p | 9   | 108471120 | 108471142 | +      | edit | 17       | 4        | 5.8%  | 0         | 0.0%   | 0         | 0.0%   |
| mmu-mir-425-5p | 9   | 108471120 | 108471142 | +      | edit | 18       | 0        | 0.0%  | 0         | 0.0%   | 0         | 0.0%   |
| mmu-mir-425-5p | 9   | 108471120 | 108471142 | +      | edit | 19       | 0        | 0.0%  | 0         | 0.0%   | 0         | 0.0%   |
| mmu-mir-425-5p | 9   | 108471120 | 108471142 | +      | edit | 20       | 0        | 0.0%  | 0         | 0.0%   | 0         | 0.0%   |
| mmu-mir-425-5p | 9   | 108471120 | 108471142 | +      | edit | 21       | 0        | 0.0%  | 0         | 0.0%   | 0         | 0.0%   |
| mmu-mir-425-5p | 9   | 108471120 | 108471142 | +      | edit | 22       | 0        | 0.0%  | 0         | 0.0%   | 0         | 0.0%   |
| EDITED         |     |           |           |        |      |          | 4        | 5.8%  | 0         | 0.0%   | 0         | 0.0%   |
| CANONICAL      |     |           |           |        |      |          | 65       | 94.2% | 44        | 100.0% | 60        | 100.0% |
| TOTAL          |     |           |           |        |      |          | 69       |       | 44        |        | 60        |        |

| miRNA          | Chr | Start     | Stop      | Strand | Type  | Position | P7 reads | P7%   | P10 reads | P10%  | P14 reads | P14%   |
|----------------|-----|-----------|-----------|--------|-------|----------|----------|-------|-----------|-------|-----------|--------|
| mmu-mir-433-3p | 12  | 110829991 | 110830012 | +      | Indel | 20       | 3        | 0.1%  | 0         | 0.0%  | 0         | 0.0%   |
| mmu-mir-433-3p | 12  | 110829991 | 110830012 | +      | edit  | 1        | 0        | 0.0%  | 0         | 0.0%  | 0         | 0.0%   |
| mmu-mir-433-3p | 12  | 110829991 | 110830012 | +      | edit  | 2        | 0        | 0.0%  | 0         | 0.0%  | 0         | 0.0%   |
| mmu-mir-433-3p | 12  | 110829991 | 110830012 | +      | edit  | 3        | 0        | 0.0%  | 0         | 0.0%  | 0         | 0.0%   |
| mmu-mir-433-3p | 12  | 110829991 | 110830012 | +      | edit  | 4        | 0        | 0.0%  | 0         | 0.0%  | 0         | 0.0%   |
| mmu-mir-433-3p | 12  | 110829991 | 110830012 | +      | edit  | 5        | 0        | 0.0%  | 0         | 0.0%  | 0         | 0.0%   |
| mmu-mir-433-3p | 12  | 110829991 | 110830012 | +      | edit  | 6        | 0        | 0.0%  | 0         | 0.0%  | 0         | 0.0%   |
| mmu-mir-433-3p | 12  | 110829991 | 110830012 | +      | edit  | 7        | 0        | 0.0%  | 0         | 0.0%  | 0         | 0.0%   |
| mmu-mir-433-3p | 12  | 110829991 | 110830012 | +      | edit  | 8        | 4        | 0.1%  | 0         | 0.0%  | 0         | 0.0%   |
| mmu-mir-433-3p | 12  | 110829991 | 110830012 | +      | edit  | 9        | 0        | 0.0%  | 0         | 0.0%  | 0         | 0.0%   |
| mmu-mir-433-3p | 12  | 110829991 | 110830012 | +      | edit  | 10       | 0        | 0.0%  | 0         | 0.0%  | 0         | 0.0%   |
| mmu-mir-433-3p | 12  | 110829991 | 110830012 | +      | edit  | 11       | 0        | 0.0%  | 0         | 0.0%  | 0         | 0.0%   |
| mmu-mir-433-3p | 12  | 110829991 | 110830012 | +      | edit  | 12       | 0        | 0.0%  | 0         | 0.0%  | 0         | 0.0%   |
| mmu-mir-433-3p | 12  | 110829991 | 110830012 | +      | edit  | 13       | 0        | 0.0%  | 0         | 0.0%  | 0         | 0.0%   |
| mmu-mir-433-3p | 12  | 110829991 | 110830012 | +      | edit  | 14       | 0        | 0.0%  | 0         | 0.0%  | 0         | 0.0%   |
| mmu-mir-433-3p | 12  | 110829991 | 110830012 | +      | edit  | 15       | 17       | 0.6%  | 4         | 0.5%  | 0         | 0.0%   |
| mmu-mir-433-3p | 12  | 110829991 | 110830012 | +      | edit  | 16       | 0        | 0.0%  | 0         | 0.0%  | 0         | 0.0%   |
| mmu-mir-433-3p | 12  | 110829991 | 110830012 | +      | edit  | 17       | 0        | 0.0%  | 0         | 0.0%  | 0         | 0.0%   |
| mmu-mir-433-3p | 12  | 110829991 | 110830012 | +      | edit  | 18       | 0        | 0.0%  | 0         | 0.0%  | 0         | 0.0%   |
| mmu-mir-433-3p | 12  | 110829991 | 110830012 | +      | edit  | 19       | 10       | 0.3%  | 0         | 0.0%  | 0         | 0.0%   |
| mmu-mir-433-3p | 12  | 110829991 | 110830012 | +      | edit  | 20       | 0        | 0.0%  | 0         | 0.0%  | 0         | 0.0%   |
| mmu-mir-433-3p | 12  | 110829991 | 110830012 | +      | edit  | 21       | 0        | 0.0%  | 0         | 0.0%  | 0         | 0.0%   |
| mmu-mir-433-3p | 12  | 110829991 | 110830012 | +      | edit  | 22       | 0        | 0.0%  | 0         | 0.0%  | 0         | 0.0%   |
| EDITED         |     |           |           |        |       |          | 34       | 1.2%  | 4         | 0.5%  | 0         | 0.0%   |
| CANONICAL      |     |           |           |        |       |          | 2883     | 98.8% | 760       | 99.5% | 280       | 100.0% |
| TOTAL          |     |           |           |        |       |          | 2917     |       | 764       |       | 280       |        |

| miRNA           | Chr | Start     | Stop      | Strand | Type     | Position | P7 reads | P7%    | P10 reads | P10%   | P14 reads | P14%  |
|-----------------|-----|-----------|-----------|--------|----------|----------|----------|--------|-----------|--------|-----------|-------|
| mmu-mir-449a-5p | 13  | 113827757 | 113827778 | +      | 3' Edit  | 3'       | 0        | 0.0%   | 0         | 0.0%   | 3         | 0.6%  |
| mmu-mir-449a-5p | 13  | 113827757 | 113827778 | +      | 3' Indel | 3'       | 0        | 0.0%   | 0         | 0.0%   | 19        | 3.7%  |
| mmu-mir-449a-5p | 13  | 113827757 | 113827778 | +      | edit     | 1        | 0        | 0.0%   | 0         | 0.0%   | 0         | 0.0%  |
| mmu-mir-449a-5p | 13  | 113827757 | 113827778 | +      | edit     | 2        | 0        | 0.0%   | 0         | 0.0%   | 0         | 0.0%  |
| mmu-mir-449a-5p | 13  | 113827757 | 113827778 | +      | edit     | 3        | 0        | 0.0%   | 0         | 0.0%   | 0         | 0.0%  |
| mmu-mir-449a-5p | 13  | 113827757 | 113827778 | +      | edit     | 4        | 0        | 0.0%   | 0         | 0.0%   | 0         | 0.0%  |
| mmu-mir-449a-5p | 13  | 113827757 | 113827778 | +      | edit     | 5        | 0        | 0.0%   | 0         | 0.0%   | 0         | 0.0%  |
| mmu-mir-449a-5p | 13  | 113827757 | 113827778 | +      | edit     | 6        | 0        | 0.0%   | 0         | 0.0%   | 0         | 0.0%  |
| mmu-mir-449a-5p | 13  | 113827757 | 113827778 | +      | edit     | 7        | 0        | 0.0%   | 0         | 0.0%   | 0         | 0.0%  |
| mmu-mir-449a-5p | 13  | 113827757 | 113827778 | +      | edit     | 8        | 0        | 0.0%   | 0         | 0.0%   | 0         | 0.0%  |
| mmu-mir-449a-5p | 13  | 113827757 | 113827778 | +      | edit     | 9        | 0        | 0.0%   | 0         | 0.0%   | 0         | 0.0%  |
| mmu-mir-449a-5p | 13  | 113827757 | 113827778 | +      | edit     | 10       | 0        | 0.0%   | 0         | 0.0%   | 0         | 0.0%  |
| mmu-mir-449a-5p | 13  | 113827757 | 113827778 | +      | edit     | 11       | 0        | 0.0%   | 0         | 0.0%   | 0         | 0.0%  |
| mmu-mir-449a-5p | 13  | 113827757 | 113827778 | +      | edit     | 12       | 0        | 0.0%   | 0         | 0.0%   | 0         | 0.0%  |
| mmu-mir-449a-5p | 13  | 113827757 | 113827778 | +      | edit     | 13       | 0        | 0.0%   | 0         | 0.0%   | 0         | 0.0%  |
| mmu-mir-449a-5p | 13  | 113827757 | 113827778 | +      | edit     | 14       | 0        | 0.0%   | 0         | 0.0%   | 0         | 0.0%  |
| mmu-mir-449a-5p | 13  | 113827757 | 113827778 | +      | edit     | 15       | 0        | 0.0%   | 0         | 0.0%   | 0         | 0.0%  |
| mmu-mir-449a-5p | 13  | 113827757 | 113827778 | +      | edit     | 16       | 0        | 0.0%   | 0         | 0.0%   | 0         | 0.0%  |
| mmu-mir-449a-5p | 13  | 113827757 | 113827778 | +      | edit     | 17       | 0        | 0.0%   | 0         | 0.0%   | 0         | 0.0%  |
| mmu-mir-449a-5p | 13  | 113827757 | 113827778 | +      | edit     | 18       | 0        | 0.0%   | 0         | 0.0%   | 0         | 0.0%  |
| mmu-mir-449a-5p | 13  | 113827757 | 113827778 | +      | edit     | 19       | 0        | 0.0%   | 0         | 0.0%   | 0         | 0.0%  |
| mmu-mir-449a-5p | 13  | 113827757 | 113827778 | +      | edit     | 20       | 0        | 0.0%   | 0         | 0.0%   | 0         | 0.0%  |
| mmu-mir-449a-5p | 13  | 113827757 | 113827778 | +      | edit     | 21       | 0        | 0.0%   | 0         | 0.0%   | 0         | 0.0%  |
| mmu-mir-449a-5p | 13  | 113827757 | 113827778 | +      | edit     | 22       | 0        | 0.0%   | 0         | 0.0%   | 0         | 0.0%  |
| EDITED          |     |           |           |        |          |          | 0        | 0.0%   | 0         | 0.0%   | 22        | 4.3%  |
| CANONICAL       |     |           |           |        |          |          | 41       | 100.0% | 27        | 100.0% | 493       | 95.7% |
| TOTAL           |     |           |           |        |          |          | 41       |        | 27        |        | 515       |       |

| miRNA           | Chr | Start     | Stop      | Strand | Type    | Position | P7 reads | P7%    | P10 reads | P10%   | P14 reads | P14%  |
|-----------------|-----|-----------|-----------|--------|---------|----------|----------|--------|-----------|--------|-----------|-------|
| mmu-mir-449c-5p | 13  | 113826216 | 113826236 | +      | 3' Edit | 3'       | 0        | 0.0%   | 0         | 0.0%   | 27        | 2.8%  |
| mmu-mir-449c-5p | 13  | 113826216 | 113826236 | +      | edit    | 1        | 0        | 0.0%   | 0         | 0.0%   | 0         | 0.0%  |
| mmu-mir-449c-5p | 13  | 113826216 | 113826236 | +      | edit    | 2        | 0        | 0.0%   | 0         | 0.0%   | 0         | 0.0%  |
| mmu-mir-449c-5p | 13  | 113826216 | 113826236 | +      | edit    | 3        | 0        | 0.0%   | 0         | 0.0%   | 0         | 0.0%  |
| mmu-mir-449c-5p | 13  | 113826216 | 113826236 | +      | edit    | 4        | 0        | 0.0%   | 0         | 0.0%   | 0         | 0.0%  |
| mmu-mir-449c-5p | 13  | 113826216 | 113826236 | +      | edit    | 5        | 0        | 0.0%   | 0         | 0.0%   | 0         | 0.0%  |
| mmu-mir-449c-5p | 13  | 113826216 | 113826236 | +      | edit    | 6        | 0        | 0.0%   | 0         | 0.0%   | 0         | 0.0%  |
| mmu-mir-449c-5p | 13  | 113826216 | 113826236 | +      | edit    | 7        | 0        | 0.0%   | 0         | 0.0%   | 0         | 0.0%  |
| mmu-mir-449c-5p | 13  | 113826216 | 113826236 | +      | edit    | 8        | 0        | 0.0%   | 0         | 0.0%   | 0         | 0.0%  |
| mmu-mir-449c-5p | 13  | 113826216 | 113826236 | +      | edit    | 9        | 0        | 0.0%   | 0         | 0.0%   | 0         | 0.0%  |
| mmu-mir-449c-5p | 13  | 113826216 | 113826236 | +      | edit    | 10       | 0        | 0.0%   | 0         | 0.0%   | 0         | 0.0%  |
| mmu-mir-449c-5p | 13  | 113826216 | 113826236 | +      | edit    | 11       | 0        | 0.0%   | 0         | 0.0%   | 3         | 0.3%  |
| mmu-mir-449c-5p | 13  | 113826216 | 113826236 | +      | edit    | 12       | 0        | 0.0%   | 0         | 0.0%   | 0         | 0.0%  |
| mmu-mir-449c-5p | 13  | 113826216 | 113826236 | +      | edit    | 13       | 0        | 0.0%   | 0         | 0.0%   | 0         | 0.0%  |
| mmu-mir-449c-5p | 13  | 113826216 | 113826236 | +      | edit    | 14       | 0        | 0.0%   | 0         | 0.0%   | 0         | 0.0%  |
| mmu-mir-449c-5p | 13  | 113826216 | 113826236 | +      | edit    | 15       | 0        | 0.0%   | 0         | 0.0%   | 0         | 0.0%  |
| mmu-mir-449c-5p | 13  | 113826216 | 113826236 | +      | edit    | 16       | 0        | 0.0%   | 0         | 0.0%   | 0         | 0.0%  |
| mmu-mir-449c-5p | 13  | 113826216 | 113826236 | +      | edit    | 17       | 0        | 0.0%   | 0         | 0.0%   | 4         | 0.4%  |
| mmu-mir-449c-5p | 13  | 113826216 | 113826236 | +      | edit    | 18       | 0        | 0.0%   | 0         | 0.0%   | 0         | 0.0%  |
| mmu-mir-449c-5p | 13  | 113826216 | 113826236 | +      | edit    | 19       | 0        | 0.0%   | 0         | 0.0%   | 10        | 1.0%  |
| mmu-mir-449c-5p | 13  | 113826216 | 113826236 | +      | edit    | 20       | 0        | 0.0%   | 0         | 0.0%   | 0         | 0.0%  |
| mmu-mir-449c-5p | 13  | 113826216 | 113826236 | +      | edit    | 21       | 0        | 0.0%   | 0         | 0.0%   | 0         | 0.0%  |
| mmu-mir-449c-5p | 13  | 113826216 | 113826236 | +      | edit    | 22       | 0        | 0.0%   | 0         | 0.0%   | 0         | 0.0%  |
| EDITED          |     |           |           |        |         |          | 0        | 0.0%   | 0         | 0.0%   | 44        | 4.6%  |
| CANONICAL       |     |           |           |        |         |          | 64       | 100.0% | 43        | 100.0% | 912       | 95.4% |
| TOTAL           |     |           |           |        |         |          | 64       |        | 43        |        | 956       |       |

| miRNA          | Chr | Start    | Stop     | Strand | Type  | Position | P7 reads | P7%   | P10 reads | P10%   | P14 reads | P14%  |
|----------------|-----|----------|----------|--------|-------|----------|----------|-------|-----------|--------|-----------|-------|
| mmu-mir-451-5p | 11  | 77886688 | 77886709 | +      | Indel | 20       | 4        | 1.0%  | 0         | 0.0%   | 0         | 0.0%  |
| mmu-mir-451-5p | 11  | 77886688 | 77886709 | +      | edit  | 1        | 0        | 0.0%  | 0         | 0.0%   | 0         | 0.0%  |
| mmu-mir-451-5p | 11  | 77886688 | 77886709 | +      | edit  | 2        | 0        | 0.0%  | 0         | 0.0%   | 0         | 0.0%  |
| mmu-mir-451-5p | 11  | 77886688 | 77886709 | +      | edit  | 3        | 0        | 0.0%  | 0         | 0.0%   | 0         | 0.0%  |
| mmu-mir-451-5p | 11  | 77886688 | 77886709 | +      | edit  | 4        | 0        | 0.0%  | 0         | 0.0%   | 0         | 0.0%  |
| mmu-mir-451-5p | 11  | 77886688 | 77886709 | +      | edit  | 5        | 0        | 0.0%  | 0         | 0.0%   | 0         | 0.0%  |
| mmu-mir-451-5p | 11  | 77886688 | 77886709 | +      | edit  | 6        | 0        | 0.0%  | 0         | 0.0%   | 0         | 0.0%  |
| mmu-mir-451-5p | 11  | 77886688 | 77886709 | +      | edit  | 7        | 0        | 0.0%  | 0         | 0.0%   | 0         | 0.0%  |
| mmu-mir-451-5p | 11  | 77886688 | 77886709 | +      | edit  | 8        | 0        | 0.0%  | 0         | 0.0%   | 0         | 0.0%  |
| mmu-mir-451-5p | 11  | 77886688 | 77886709 | +      | edit  | 9        | 0        | 0.0%  | 0         | 0.0%   | 0         | 0.0%  |
| mmu-mir-451-5p | 11  | 77886688 | 77886709 | +      | edit  | 10       | 0        | 0.0%  | 0         | 0.0%   | 0         | 0.0%  |
| mmu-mir-451-5p | 11  | 77886688 | 77886709 | +      | edit  | 11       | 0        | 0.0%  | 0         | 0.0%   | 0         | 0.0%  |
| mmu-mir-451-5p | 11  | 77886688 | 77886709 | +      | edit  | 12       | 0        | 0.0%  | 0         | 0.0%   | 0         | 0.0%  |
| mmu-mir-451-5p | 11  | 77886688 | 77886709 | +      | edit  | 13       | 0        | 0.0%  | 0         | 0.0%   | 0         | 0.0%  |
| mmu-mir-451-5p | 11  | 77886688 | 77886709 | +      | edit  | 14       | 0        | 0.0%  | 0         | 0.0%   | 0         | 0.0%  |
| mmu-mir-451-5p | 11  | 77886688 | 77886709 | +      | edit  | 15       | 0        | 0.0%  | 0         | 0.0%   | 0         | 0.0%  |
| mmu-mir-451-5p | 11  | 77886688 | 77886709 | +      | edit  | 16       | 0        | 0.0%  | 0         | 0.0%   | 0         | 0.0%  |
| mmu-mir-451-5p | 11  | 77886688 | 77886709 | +      | edit  | 17       | 0        | 0.0%  | 0         | 0.0%   | 0         | 0.0%  |
| mmu-mir-451-5p | 11  | 77886688 | 77886709 | +      | edit  | 18       | 0        | 0.0%  | 0         | 0.0%   | 0         | 0.0%  |
| mmu-mir-451-5p | 11  | 77886688 | 77886709 | +      | edit  | 19       | 0        | 0.0%  | 0         | 0.0%   | 3         | 1.9%  |
| mmu-mir-451-5p | 11  | 77886688 | 77886709 | +      | edit  | 20       | 0        | 0.0%  | 0         | 0.0%   | 0         | 0.0%  |
| mmu-mir-451-5p | 11  | 77886688 | 77886709 | +      | edit  | 21       | 0        | 0.0%  | 0         | 0.0%   | 0         | 0.0%  |
| mmu-mir-451-5p | 11  | 77886688 | 77886709 | +      | edit  | 22       | 0        | 0.0%  | 0         | 0.0%   | 0         | 0.0%  |
| EDITED         |     |          |          |        |       |          | 4        | 1.0%  | 0         | 0.0%   | 3         | 1.9%  |
| CANONICAL      |     |          |          |        |       |          | 396      | 99.0% | 103       | 100.0% | 155       | 98.1% |
| TOTAL          |     |          |          |        |       |          | 400      |       | 103       |        | 158       |       |

| miRNA           | Chr | Start    | Stop     | Strand | Type  | Position | P7 reads | P7%   | P10 reads | P10%  | P14 reads | P14%  |
|-----------------|-----|----------|----------|--------|-------|----------|----------|-------|-----------|-------|-----------|-------|
| mmu-mir-465a-3p | X   | 64092238 | 64092259 | -      | Indel | 22       | 0        | 0.0%  | 0         | 0.0%  | 4         | 0.3%  |
| mmu-mir-465a-3p | X   | 64092238 | 64092259 | -      | edit  | 1        | 0        | 0.0%  | 0         | 0.0%  | 0         | 0.0%  |
| mmu-mir-465a-3p | X   | 64092238 | 64092259 | -      | edit  | 2        | 0        | 0.0%  | 0         | 0.0%  | 0         | 0.0%  |
| mmu-mir-465a-3p | X   | 64092238 | 64092259 | -      | edit  | 3        | 0        | 0.0%  | 0         | 0.0%  | 0         | 0.0%  |
| mmu-mir-465a-3p | X   | 64092238 | 64092259 | -      | edit  | 4        | 0        | 0.0%  | 0         | 0.0%  | 0         | 0.0%  |
| mmu-mir-465a-3p | X   | 64092238 | 64092259 | -      | edit  | 5        | 0        | 0.0%  | 0         | 0.0%  | 0         | 0.0%  |
| mmu-mir-465a-3p | X   | 64092238 | 64092259 | -      | edit  | 6        | 0        | 0.0%  | 0         | 0.0%  | 0         | 0.0%  |
| mmu-mir-465a-3p | X   | 64092238 | 64092259 | -      | edit  | 7        | 0        | 0.0%  | 0         | 0.0%  | 0         | 0.0%  |
| mmu-mir-465a-3p | X   | 64092238 | 64092259 | -      | edit  | 8        | 0        | 0.0%  | 0         | 0.0%  | 0         | 0.0%  |
| mmu-mir-465a-3p | X   | 64092238 | 64092259 | -      | edit  | 9        | 0        | 0.0%  | 0         | 0.0%  | 0         | 0.0%  |
| mmu-mir-465a-3p | X   | 64092238 | 64092259 | -      | edit  | 10       | 0        | 0.0%  | 0         | 0.0%  | 0         | 0.0%  |
| mmu-mir-465a-3p | X   | 64092238 | 64092259 | -      | edit  | 11       | 0        | 0.0%  | 0         | 0.0%  | 0         | 0.0%  |
| mmu-mir-465a-3p | X   | 64092238 | 64092259 | -      | edit  | 12       | 0        | 0.0%  | 0         | 0.0%  | 0         | 0.0%  |
| mmu-mir-465a-3p | X   | 64092238 | 64092259 | -      | edit  | 13       | 0        | 0.0%  | 0         | 0.0%  | 0         | 0.0%  |
| mmu-mir-465a-3p | X   | 64092238 | 64092259 | -      | edit  | 14       | 0        | 0.0%  | 0         | 0.0%  | 0         | 0.0%  |
| mmu-mir-465a-3p | X   | 64092238 | 64092259 | -      | edit  | 15       | 0        | 0.0%  | 0         | 0.0%  | 0         | 0.0%  |
| mmu-mir-465a-3p | X   | 64092238 | 64092259 | -      | edit  | 16       | 0        | 0.0%  | 3         | 0.2%  | 0         | 0.0%  |
| mmu-mir-465a-3p | X   | 64092238 | 64092259 | -      | edit  | 17       | 0        | 0.0%  | 33        | 1.7%  | 4         | 0.2%  |
| mmu-mir-465a-3p | X   | 64092238 | 64092259 | -      | edit  | 18       | 0        | 0.0%  | 0         | 0.0%  | 0         | 0.0%  |
| mmu-mir-465a-3p | X   | 64092238 | 64092259 | -      | edit  | 19       | 4        | 0.6%  | 11        | 0.6%  | 15        | 0.9%  |
| mmu-mir-465a-3p | X   | 64092238 | 64092259 | -      | edit  | 20       | 0        | 0.0%  | 0         | 0.0%  | 0         | 0.0%  |
| mmu-mir-465a-3p | X   | 64092238 | 64092259 | -      | edit  | 21       | 0        | 0.0%  | 0         | 0.0%  | 0         | 0.0%  |
| mmu-mir-465a-3p | X   | 64092238 | 64092259 | -      | edit  | 22       | 0        | 0.0%  | 0         | 0.0%  | 0         | 0.0%  |
| EDITED          |     |          |          |        |       |          | 4        | 0.6%  | 47        | 2.5%  | 23        | 1.4%  |
| CANONICAL       |     |          |          |        |       |          | 720      | 99.4% | 1856      | 97.5% | 1589      | 98.6% |
| TOTAL           |     |          |          |        |       |          | 724      |       | 1903      |       | 1612      |       |



| miRNA           | Chr | Start    | Stop     | Strand | Type | Position | P7 reads | P7%    | P10 reads | P10%  | P14 reads | P14%  |
|-----------------|-----|----------|----------|--------|------|----------|----------|--------|-----------|-------|-----------|-------|
| mmu-mir-465a-5p | X   | 64092274 | 64092296 | -      | edit | 1        | 0        | 0.0%   | 0         | 0.0%  | 0         | 0.0%  |
| mmu-mir-465a-5p | X   | 64092274 | 64092296 | -      | edit | 2        | 0        | 0.0%   | 0         | 0.0%  | 0         | 0.0%  |
| mmu-mir-465a-5p | X   | 64092274 | 64092296 | -      | edit | 3        | 0        | 0.0%   | 0         | 0.0%  | 0         | 0.0%  |
| mmu-mir-465a-5p | X   | 64092274 | 64092296 | -      | edit | 4        | 0        | 0.0%   | 0         | 0.0%  | 0         | 0.0%  |
| mmu-mir-465a-5p | X   | 64092274 | 64092296 | -      | edit | 5        | 0        | 0.0%   | 0         | 0.0%  | 0         | 0.0%  |
| mmu-mir-465a-5p | X   | 64092274 | 64092296 | -      | edit | 6        | 0        | 0.0%   | 0         | 0.0%  | 0         | 0.0%  |
| mmu-mir-465a-5p | X   | 64092274 | 64092296 | -      | edit | 7        | 0        | 0.0%   | 0         | 0.0%  | 0         | 0.0%  |
| mmu-mir-465a-5p | X   | 64092274 | 64092296 | -      | edit | 8        | 0        | 0.0%   | 0         | 0.0%  | 0         | 0.0%  |
| mmu-mir-465a-5p | X   | 64092274 | 64092296 | -      | edit | 9        | 0        | 0.0%   | 0         | 0.0%  | 0         | 0.0%  |
| mmu-mir-465a-5p | X   | 64092274 | 64092296 | -      | edit | 10       | 0        | 0.0%   | 0         | 0.0%  | 0         | 0.0%  |
| mmu-mir-465a-5p | X   | 64092274 | 64092296 | -      | edit | 11       | 0        | 0.0%   | 0         | 0.0%  | 0         | 0.0%  |
| mmu-mir-465a-5p | X   | 64092274 | 64092296 | -      | edit | 12       | 0        | 0.0%   | 0         | 0.0%  | 0         | 0.0%  |
| mmu-mir-465a-5p | X   | 64092274 | 64092296 | -      | edit | 13       | 0        | 0.0%   | 0         | 0.0%  | 0         | 0.0%  |
| mmu-mir-465a-5p | X   | 64092274 | 64092296 | -      | edit | 14       | 0        | 0.0%   | 0         | 0.0%  | 0         | 0.0%  |
| mmu-mir-465a-5p | X   | 64092274 | 64092296 | -      | edit | 15       | 0        | 0.0%   | 0         | 0.0%  | 4         | 0.4%  |
| mmu-mir-465a-5p | X   | 64092274 | 64092296 | -      | edit | 16       | 0        | 0.0%   | 0         | 0.0%  | 0         | 0.0%  |
| mmu-mir-465a-5p | X   | 64092274 | 64092296 | -      | edit | 17       | 0        | 0.0%   | 0         | 0.0%  | 0         | 0.0%  |
| mmu-mir-465a-5p | X   | 64092274 | 64092296 | -      | edit | 18       | 0        | 0.0%   | 18        | 1.6%  | 0         | 0.0%  |
| mmu-mir-465a-5p | X   | 64092274 | 64092296 | -      | edit | 19       | 0        | 0.0%   | 0         | 0.0%  | 4         | 0.4%  |
| mmu-mir-465a-5p | X   | 64092274 | 64092296 | -      | edit | 20       | 0        | 0.0%   | 0         | 0.0%  | 0         | 0.0%  |
| mmu-mir-465a-5p | X   | 64092274 | 64092296 | -      | edit | 21       | 0        | 0.0%   | 0         | 0.0%  | 7         | 0.7%  |
| mmu-mir-465a-5p | X   | 64092274 | 64092296 | -      | edit | 22       | 0        | 0.0%   | 0         | 0.0%  | 0         | 0.0%  |
| EDITED          |     |          |          |        |      |          | 0        | 0.0%   | 18        | 1.6%  | 15        | 1.4%  |
| CANONICAL       |     |          |          |        |      |          | 488      | 100.0% | 1095      | 98.4% | 1028      | 98.6% |
| TOTAL           |     |          |          |        |      |          | 488      |        | 1113      |       | 1043      |       |

| miRNA             | Chr | Start    | Stop     | Strand | Type  | Position | P7 reads | P7%   | P10 reads | P10%  | P14 reads | P14%  |
|-------------------|-----|----------|----------|--------|-------|----------|----------|-------|-----------|-------|-----------|-------|
| mmu-mir-465b-1-3p | X   | 64082387 | 64082408 | -      | Indel | 22       | 0        | 0.0%  | 0         | 0.0%  | 4         | 0.3%  |
| mmu-mir-465b-1-3p | X   | 64082387 | 64082408 | -      | edit  | 1        | 0        | 0.0%  | 0         | 0.0%  | 0         | 0.0%  |
| mmu-mir-465b-1-3p | X   | 64082387 | 64082408 | -      | edit  | 2        | 0        | 0.0%  | 0         | 0.0%  | 0         | 0.0%  |
| mmu-mir-465b-1-3p | X   | 64082387 | 64082408 | -      | edit  | 3        | 0        | 0.0%  | 0         | 0.0%  | 0         | 0.0%  |
| mmu-mir-465b-1-3p | X   | 64082387 | 64082408 | -      | edit  | 4        | 0        | 0.0%  | 0         | 0.0%  | 0         | 0.0%  |
| mmu-mir-465b-1-3p | X   | 64082387 | 64082408 | -      | edit  | 5        | 0        | 0.0%  | 0         | 0.0%  | 0         | 0.0%  |
| mmu-mir-465b-1-3p | X   | 64082387 | 64082408 | -      | edit  | 6        | 0        | 0.0%  | 0         | 0.0%  | 0         | 0.0%  |
| mmu-mir-465b-1-3p | X   | 64082387 | 64082408 | -      | edit  | 7        | 0        | 0.0%  | 0         | 0.0%  | 0         | 0.0%  |
| mmu-mir-465b-1-3p | X   | 64082387 | 64082408 | -      | edit  | 8        | 0        | 0.0%  | 0         | 0.0%  | 0         | 0.0%  |
| mmu-mir-465b-1-3p | X   | 64082387 | 64082408 | -      | edit  | 9        | 0        | 0.0%  | 0         | 0.0%  | 0         | 0.0%  |
| mmu-mir-465b-1-3p | X   | 64082387 | 64082408 | -      | edit  | 10       | 0        | 0.0%  | 0         | 0.0%  | 0         | 0.0%  |
| mmu-mir-465b-1-3p | X   | 64082387 | 64082408 | -      | edit  | 11       | 0        | 0.0%  | 0         | 0.0%  | 0         | 0.0%  |
| mmu-mir-465b-1-3p | X   | 64082387 | 64082408 | -      | edit  | 12       | 0        | 0.0%  | 0         | 0.0%  | 0         | 0.0%  |
| mmu-mir-465b-1-3p | X   | 64082387 | 64082408 | -      | edit  | 13       | 0        | 0.0%  | 0         | 0.0%  | 0         | 0.0%  |
| mmu-mir-465b-1-3p | X   | 64082387 | 64082408 | -      | edit  | 14       | 0        | 0.0%  | 0         | 0.0%  | 0         | 0.0%  |
| mmu-mir-465b-1-3p | X   | 64082387 | 64082408 | -      | edit  | 15       | 0        | 0.0%  | 0         | 0.0%  | 0         | 0.0%  |
| mmu-mir-465b-1-3p | X   | 64082387 | 64082408 | -      | edit  | 16       | 0        | 0.0%  | 3         | 0.2%  | 0         | 0.0%  |
| mmu-mir-465b-1-3p | X   | 64082387 | 64082408 | -      | edit  | 17       | 0        | 0.0%  | 33        | 1.7%  | 4         | 0.2%  |
| mmu-mir-465b-1-3p | X   | 64082387 | 64082408 | -      | edit  | 18       | 0        | 0.0%  | 0         | 0.0%  | 0         | 0.0%  |
| mmu-mir-465b-1-3p | X   | 64082387 | 64082408 | -      | edit  | 19       | 4        | 0.6%  | 11        | 0.6%  | 15        | 0.9%  |
| mmu-mir-465b-1-3p | X   | 64082387 | 64082408 | -      | edit  | 20       | 0        | 0.0%  | 0         | 0.0%  | 0         | 0.0%  |
| mmu-mir-465b-1-3p | X   | 64082387 | 64082408 | -      | edit  | 21       | 0        | 0.0%  | 0         | 0.0%  | 0         | 0.0%  |
| mmu-mir-465b-1-3p | X   | 64082387 | 64082408 | -      | edit  | 22       | 0        | 0.0%  | 0         | 0.0%  | 0         | 0.0%  |
| EDITED            |     |          |          |        |       |          | 4        | 0.6%  | 47        | 2.5%  | 23        | 1.4%  |
| CANONICAL         |     |          |          |        |       |          | 718      | 99.4% | 1855      | 97.5% | 1588      | 98.6% |
| TOTAL             |     |          |          |        |       |          | 722      |       | 1902      |       | 1611      |       |

| miRNA             | Chr | Start    | Stop     | Strand | Type | Position | P7 reads | P7%    | P10 reads | P10%   | P14 reads | P14%  |
|-------------------|-----|----------|----------|--------|------|----------|----------|--------|-----------|--------|-----------|-------|
| mmu-mir-465b-1-5p | X   | 64082424 | 64082445 | -      | edit | 1        | 0        | 0.0%   | 0         | 0.0%   | 0         | 0.0%  |
| mmu-mir-465b-1-5p | X   | 64082424 | 64082445 | -      | edit | 2        | 0        | 0.0%   | 0         | 0.0%   | 0         | 0.0%  |
| mmu-mir-465b-1-5p | X   | 64082424 | 64082445 | -      | edit | 3        | 0        | 0.0%   | 0         | 0.0%   | 0         | 0.0%  |
| mmu-mir-465b-1-5p | X   | 64082424 | 64082445 | -      | edit | 4        | 0        | 0.0%   | 0         | 0.0%   | 0         | 0.0%  |
| mmu-mir-465b-1-5p | X   | 64082424 | 64082445 | -      | edit | 5        | 0        | 0.0%   | 0         | 0.0%   | 0         | 0.0%  |
| mmu-mir-465b-1-5p | X   | 64082424 | 64082445 | -      | edit | 6        | 0        | 0.0%   | 0         | 0.0%   | 0         | 0.0%  |
| mmu-mir-465b-1-5p | X   | 64082424 | 64082445 | -      | edit | 7        | 0        | 0.0%   | 0         | 0.0%   | 0         | 0.0%  |
| mmu-mir-465b-1-5p | X   | 64082424 | 64082445 | -      | edit | 8        | 0        | 0.0%   | 0         | 0.0%   | 0         | 0.0%  |
| mmu-mir-465b-1-5p | X   | 64082424 | 64082445 | -      | edit | 9        | 0        | 0.0%   | 0         | 0.0%   | 0         | 0.0%  |
| mmu-mir-465b-1-5p | X   | 64082424 | 64082445 | -      | edit | 10       | 0        | 0.0%   | 0         | 0.0%   | 0         | 0.0%  |
| mmu-mir-465b-1-5p | X   | 64082424 | 64082445 | -      | edit | 11       | 0        | 0.0%   | 0         | 0.0%   | 0         | 0.0%  |
| mmu-mir-465b-1-5p | X   | 64082424 | 64082445 | -      | edit | 12       | 0        | 0.0%   | 0         | 0.0%   | 0         | 0.0%  |
| mmu-mir-465b-1-5p | X   | 64082424 | 64082445 | -      | edit | 13       | 0        | 0.0%   | 0         | 0.0%   | 0         | 0.0%  |
| mmu-mir-465b-1-5p | X   | 64082424 | 64082445 | -      | edit | 14       | 0        | 0.0%   | 0         | 0.0%   | 0         | 0.0%  |
| mmu-mir-465b-1-5p | X   | 64082424 | 64082445 | -      | edit | 15       | 0        | 0.0%   | 0         | 0.0%   | 3         | 0.6%  |
| mmu-mir-465b-1-5p | X   | 64082424 | 64082445 | -      | edit | 16       | 0        | 0.0%   | 0         | 0.0%   | 0         | 0.0%  |
| mmu-mir-465b-1-5p | X   | 64082424 | 64082445 | -      | edit | 17       | 0        | 0.0%   | 0         | 0.0%   | 0         | 0.0%  |
| mmu-mir-465b-1-5p | X   | 64082424 | 64082445 | -      | edit | 18       | 0        | 0.0%   | 0         | 0.0%   | 0         | 0.0%  |
| mmu-mir-465b-1-5p | X   | 64082424 | 64082445 | -      | edit | 19       | 0        | 0.0%   | 0         | 0.0%   | 0         | 0.0%  |
| mmu-mir-465b-1-5p | X   | 64082424 | 64082445 | -      | edit | 20       | 0        | 0.0%   | 0         | 0.0%   | 0         | 0.0%  |
| mmu-mir-465b-1-5p | X   | 64082424 | 64082445 | -      | edit | 21       | 0        | 0.0%   | 0         | 0.0%   | 0         | 0.0%  |
| mmu-mir-465b-1-5p | X   | 64082424 | 64082445 | -      | edit | 22       | 0        | 0.0%   | 0         | 0.0%   | 0         | 0.0%  |
| EDITED            |     |          |          |        |      |          | 0        | 0.0%   | 0         | 0.0%   | 3         | 0.6%  |
| CANONICAL         |     |          |          |        |      |          | 234      | 100.0% | 552       | 100.0% | 615       | 99.4% |
| TOTAL             |     |          |          |        |      |          | 234      |        | 552       |        | 618       |       |

| miRNA             | Chr | Start    | Stop     | Strand | Type  | Position | P7 reads | P7%   | P10 reads | P10%  | P14 reads | P14%  |
|-------------------|-----|----------|----------|--------|-------|----------|----------|-------|-----------|-------|-----------|-------|
| mmu-mir-465b-2-3p | X   | 64088949 | 64088970 | -      | Indel | 22       | 0        | 0.0%  | 0         | 0.0%  | 4         | 0.3%  |
| mmu-mir-465b-2-3p | X   | 64088949 | 64088970 | -      | edit  | 1        | 0        | 0.0%  | 0         | 0.0%  | 0         | 0.0%  |
| mmu-mir-465b-2-3p | X   | 64088949 | 64088970 | -      | edit  | 2        | 0        | 0.0%  | 0         | 0.0%  | 0         | 0.0%  |
| mmu-mir-465b-2-3p | X   | 64088949 | 64088970 | -      | edit  | 3        | 0        | 0.0%  | 0         | 0.0%  | 0         | 0.0%  |
| mmu-mir-465b-2-3p | X   | 64088949 | 64088970 | -      | edit  | 4        | 0        | 0.0%  | 0         | 0.0%  | 0         | 0.0%  |
| mmu-mir-465b-2-3p | X   | 64088949 | 64088970 | -      | edit  | 5        | 0        | 0.0%  | 0         | 0.0%  | 0         | 0.0%  |
| mmu-mir-465b-2-3p | X   | 64088949 | 64088970 | -      | edit  | 6        | 0        | 0.0%  | 0         | 0.0%  | 0         | 0.0%  |
| mmu-mir-465b-2-3p | X   | 64088949 | 64088970 | -      | edit  | 7        | 0        | 0.0%  | 0         | 0.0%  | 0         | 0.0%  |
| mmu-mir-465b-2-3p | X   | 64088949 | 64088970 | -      | edit  | 8        | 0        | 0.0%  | 0         | 0.0%  | 0         | 0.0%  |
| mmu-mir-465b-2-3p | X   | 64088949 | 64088970 | -      | edit  | 9        | 0        | 0.0%  | 0         | 0.0%  | 0         | 0.0%  |
| mmu-mir-465b-2-3p | X   | 64088949 | 64088970 | -      | edit  | 10       | 0        | 0.0%  | 0         | 0.0%  | 0         | 0.0%  |
| mmu-mir-465b-2-3p | X   | 64088949 | 64088970 | -      | edit  | 11       | 0        | 0.0%  | 0         | 0.0%  | 0         | 0.0%  |
| mmu-mir-465b-2-3p | X   | 64088949 | 64088970 | -      | edit  | 12       | 0        | 0.0%  | 0         | 0.0%  | 0         | 0.0%  |
| mmu-mir-465b-2-3p | X   | 64088949 | 64088970 | -      | edit  | 13       | 0        | 0.0%  | 0         | 0.0%  | 0         | 0.0%  |
| mmu-mir-465b-2-3p | X   | 64088949 | 64088970 | -      | edit  | 14       | 0        | 0.0%  | 0         | 0.0%  | 0         | 0.0%  |
| mmu-mir-465b-2-3p | X   | 64088949 | 64088970 | -      | edit  | 15       | 0        | 0.0%  | 0         | 0.0%  | 0         | 0.0%  |
| mmu-mir-465b-2-3p | X   | 64088949 | 64088970 | -      | edit  | 16       | 0        | 0.0%  | 3         | 0.2%  | 0         | 0.0%  |
| mmu-mir-465b-2-3p | X   | 64088949 | 64088970 | -      | edit  | 17       | 0        | 0.0%  | 33        | 1.7%  | 4         | 0.2%  |
| mmu-mir-465b-2-3p | X   | 64088949 | 64088970 | -      | edit  | 18       | 0        | 0.0%  | 0         | 0.0%  | 0         | 0.0%  |
| mmu-mir-465b-2-3p | X   | 64088949 | 64088970 | -      | edit  | 19       | 4        | 0.6%  | 11        | 0.6%  | 15        | 0.9%  |
| mmu-mir-465b-2-3p | X   | 64088949 | 64088970 | -      | edit  | 20       | 0        | 0.0%  | 0         | 0.0%  | 0         | 0.0%  |
| mmu-mir-465b-2-3p | X   | 64088949 | 64088970 | -      | edit  | 21       | 0        | 0.0%  | 0         | 0.0%  | 0         | 0.0%  |
| mmu-mir-465b-2-3p | X   | 64088949 | 64088970 | -      | edit  | 22       | 0        | 0.0%  | 0         | 0.0%  | 0         | 0.0%  |
| EDITED            |     |          |          |        |       |          | 4        | 0.6%  | 47        | 2.5%  | 19        | 1.2%  |
| CANONICAL         |     |          |          |        |       |          | 718      | 99.4% | 1855      | 97.5% | 1588      | 98.8% |
| TOTAL             |     |          |          |        |       |          | 722      |       | 1902      |       | 1607      |       |

| miRNA             | Chr | Start    | Stop     | Strand | Type | Position | P7 reads | P7%    | P10 reads | P10%   | P14 reads | P14%  |
|-------------------|-----|----------|----------|--------|------|----------|----------|--------|-----------|--------|-----------|-------|
| mmu-mir-465b-2-5p | X   | 64088986 | 64089007 | -      | edit | 1        | 0        | 0.0%   | 0         | 0.0%   | 0         | 0.0%  |
| mmu-mir-465b-2-5p | X   | 64088986 | 64089007 | -      | edit | 2        | 0        | 0.0%   | 0         | 0.0%   | 0         | 0.0%  |
| mmu-mir-465b-2-5p | X   | 64088986 | 64089007 | -      | edit | 3        | 0        | 0.0%   | 0         | 0.0%   | 0         | 0.0%  |
| mmu-mir-465b-2-5p | X   | 64088986 | 64089007 | -      | edit | 4        | 0        | 0.0%   | 0         | 0.0%   | 0         | 0.0%  |
| mmu-mir-465b-2-5p | X   | 64088986 | 64089007 | -      | edit | 5        | 0        | 0.0%   | 0         | 0.0%   | 0         | 0.0%  |
| mmu-mir-465b-2-5p | X   | 64088986 | 64089007 | -      | edit | 6        | 0        | 0.0%   | 0         | 0.0%   | 0         | 0.0%  |
| mmu-mir-465b-2-5p | X   | 64088986 | 64089007 | -      | edit | 7        | 0        | 0.0%   | 0         | 0.0%   | 0         | 0.0%  |
| mmu-mir-465b-2-5p | X   | 64088986 | 64089007 | -      | edit | 8        | 0        | 0.0%   | 0         | 0.0%   | 0         | 0.0%  |
| mmu-mir-465b-2-5p | X   | 64088986 | 64089007 | -      | edit | 9        | 0        | 0.0%   | 0         | 0.0%   | 0         | 0.0%  |
| mmu-mir-465b-2-5p | X   | 64088986 | 64089007 | -      | edit | 10       | 0        | 0.0%   | 0         | 0.0%   | 0         | 0.0%  |
| mmu-mir-465b-2-5p | X   | 64088986 | 64089007 | -      | edit | 11       | 0        | 0.0%   | 0         | 0.0%   | 0         | 0.0%  |
| mmu-mir-465b-2-5p | X   | 64088986 | 64089007 | -      | edit | 12       | 0        | 0.0%   | 0         | 0.0%   | 0         | 0.0%  |
| mmu-mir-465b-2-5p | X   | 64088986 | 64089007 | -      | edit | 13       | 0        | 0.0%   | 0         | 0.0%   | 0         | 0.0%  |
| mmu-mir-465b-2-5p | X   | 64088986 | 64089007 | -      | edit | 14       | 0        | 0.0%   | 0         | 0.0%   | 0         | 0.0%  |
| mmu-mir-465b-2-5p | X   | 64088986 | 64089007 | -      | edit | 15       | 0        | 0.0%   | 0         | 0.0%   | 3         | 0.6%  |
| mmu-mir-465b-2-5p | X   | 64088986 | 64089007 | -      | edit | 16       | 0        | 0.0%   | 0         | 0.0%   | 0         | 0.0%  |
| mmu-mir-465b-2-5p | X   | 64088986 | 64089007 | -      | edit | 17       | 0        | 0.0%   | 0         | 0.0%   | 0         | 0.0%  |
| mmu-mir-465b-2-5p | X   | 64088986 | 64089007 | -      | edit | 18       | 0        | 0.0%   | 0         | 0.0%   | 0         | 0.0%  |
| mmu-mir-465b-2-5p | X   | 64088986 | 64089007 | -      | edit | 19       | 0        | 0.0%   | 0         | 0.0%   | 0         | 0.0%  |
| mmu-mir-465b-2-5p | X   | 64088986 | 64089007 | -      | edit | 20       | 0        | 0.0%   | 0         | 0.0%   | 0         | 0.0%  |
| mmu-mir-465b-2-5p | X   | 64088986 | 64089007 | -      | edit | 21       | 0        | 0.0%   | 0         | 0.0%   | 0         | 0.0%  |
| mmu-mir-465b-2-5p | X   | 64088986 | 64089007 | -      | edit | 22       | 0        | 0.0%   | 0         | 0.0%   | 0         | 0.0%  |
| EDITED            |     |          |          |        |      |          | 0        | 0.0%   | 0         | 0.0%   | 3         | 0.6%  |
| CANONICAL         |     |          |          |        |      |          | 234      | 100.0% | 552       | 100.0% | 615       | 99.4% |
| TOTAL             |     |          |          |        |      |          | 234      |        | 552       |        | 618       |       |

| miRNA             | Chr | Start    | Stop     | Strand | Type  | Position | P7 reads | P7%   | P10 reads | P10%  | P14 reads | P14%  |
|-------------------|-----|----------|----------|--------|-------|----------|----------|-------|-----------|-------|-----------|-------|
| mmu-mir-465c-1-3p | X   | 64079140 | 64079161 | -      | Indel | 22       | 0        | 0.0%  | 0         | 0.0%  | 4         | 0.3%  |
| mmu-mir-465c-1-3p | X   | 64079140 | 64079161 | -      | edit  | 1        | 0        | 0.0%  | 0         | 0.0%  | 0         | 0.0%  |
| mmu-mir-465c-1-3p | X   | 64079140 | 64079161 | -      | edit  | 2        | 0        | 0.0%  | 0         | 0.0%  | 0         | 0.0%  |
| mmu-mir-465c-1-3p | X   | 64079140 | 64079161 | -      | edit  | 3        | 0        | 0.0%  | 0         | 0.0%  | 0         | 0.0%  |
| mmu-mir-465c-1-3p | X   | 64079140 | 64079161 | -      | edit  | 4        | 0        | 0.0%  | 0         | 0.0%  | 0         | 0.0%  |
| mmu-mir-465c-1-3p | X   | 64079140 | 64079161 | -      | edit  | 5        | 0        | 0.0%  | 0         | 0.0%  | 0         | 0.0%  |
| mmu-mir-465c-1-3p | X   | 64079140 | 64079161 | -      | edit  | 6        | 0        | 0.0%  | 0         | 0.0%  | 0         | 0.0%  |
| mmu-mir-465c-1-3p | X   | 64079140 | 64079161 | -      | edit  | 7        | 0        | 0.0%  | 0         | 0.0%  | 0         | 0.0%  |
| mmu-mir-465c-1-3p | X   | 64079140 | 64079161 | -      | edit  | 8        | 0        | 0.0%  | 0         | 0.0%  | 0         | 0.0%  |
| mmu-mir-465c-1-3p | X   | 64079140 | 64079161 | -      | edit  | 9        | 0        | 0.0%  | 0         | 0.0%  | 0         | 0.0%  |
| mmu-mir-465c-1-3p | X   | 64079140 | 64079161 | -      | edit  | 10       | 0        | 0.0%  | 0         | 0.0%  | 0         | 0.0%  |
| mmu-mir-465c-1-3p | X   | 64079140 | 64079161 | -      | edit  | 11       | 0        | 0.0%  | 0         | 0.0%  | 0         | 0.0%  |
| mmu-mir-465c-1-3p | X   | 64079140 | 64079161 | -      | edit  | 12       | 0        | 0.0%  | 0         | 0.0%  | 0         | 0.0%  |
| mmu-mir-465c-1-3p | X   | 64079140 | 64079161 | -      | edit  | 13       | 0        | 0.0%  | 0         | 0.0%  | 0         | 0.0%  |
| mmu-mir-465c-1-3p | X   | 64079140 | 64079161 | -      | edit  | 14       | 0        | 0.0%  | 0         | 0.0%  | 0         | 0.0%  |
| mmu-mir-465c-1-3p | X   | 64079140 | 64079161 | -      | edit  | 15       | 0        | 0.0%  | 0         | 0.0%  | 0         | 0.0%  |
| mmu-mir-465c-1-3p | X   | 64079140 | 64079161 | -      | edit  | 16       | 0        | 0.0%  | 3         | 0.2%  | 0         | 0.0%  |
| mmu-mir-465c-1-3p | X   | 64079140 | 64079161 | -      | edit  | 17       | 0        | 0.0%  | 33        | 1.7%  | 4         | 0.2%  |
| mmu-mir-465c-1-3p | X   | 64079140 | 64079161 | -      | edit  | 18       | 0        | 0.0%  | 0         | 0.0%  | 0         | 0.0%  |
| mmu-mir-465c-1-3p | X   | 64079140 | 64079161 | -      | edit  | 19       | 4        | 0.6%  | 11        | 0.6%  | 15        | 0.9%  |
| mmu-mir-465c-1-3p | X   | 64079140 | 64079161 | -      | edit  | 20       | 0        | 0.0%  | 0         | 0.0%  | 0         | 0.0%  |
| mmu-mir-465c-1-3p | X   | 64079140 | 64079161 | -      | edit  | 21       | 0        | 0.0%  | 0         | 0.0%  | 0         | 0.0%  |
| mmu-mir-465c-1-3p | X   | 64079140 | 64079161 | -      | edit  | 22       | 0        | 0.0%  | 0         | 0.0%  | 0         | 0.0%  |
| EDITED            |     |          |          |        |       |          | 4        | 0.6%  | 47        | 2.5%  | 23        | 1.4%  |
| CANONICAL         |     |          |          |        |       |          | 717      | 99.4% | 1856      | 97.5% | 1587      | 98.6% |
| TOTAL             |     |          |          |        |       |          | 721      |       | 1903      |       | 1610      |       |

| miRNA             | Chr | Start    | Stop     | Strand | Type    | Position | P7 reads | P7%   | P10 reads | P10%  | P14 reads | P14%  |
|-------------------|-----|----------|----------|--------|---------|----------|----------|-------|-----------|-------|-----------|-------|
| mmu-mir-465c-1-5p | X   | 64079179 | 64079200 | -      | 5' Edit | 5'       | 0        | 0.0%  | 0         | 0.0%  | 6         | 0.2%  |
| mmu-mir-465c-1-5p | X   | 64079179 | 64079200 | -      | edit    | 1        | 0        | 0.0%  | 0         | 0.0%  | 0         | 0.0%  |
| mmu-mir-465c-1-5p | X   | 64079179 | 64079200 | -      | edit    | 2        | 0        | 0.0%  | 0         | 0.0%  | 0         | 0.0%  |
| mmu-mir-465c-1-5p | X   | 64079179 | 64079200 | -      | edit    | 3        | 0        | 0.0%  | 0         | 0.0%  | 0         | 0.0%  |
| mmu-mir-465c-1-5p | X   | 64079179 | 64079200 | -      | edit    | 4        | 0        | 0.0%  | 0         | 0.0%  | 0         | 0.0%  |
| mmu-mir-465c-1-5p | X   | 64079179 | 64079200 | -      | edit    | 5        | 0        | 0.0%  | 0         | 0.0%  | 0         | 0.0%  |
| mmu-mir-465c-1-5p | X   | 64079179 | 64079200 | -      | edit    | 6        | 0        | 0.0%  | 0         | 0.0%  | 0         | 0.0%  |
| mmu-mir-465c-1-5p | X   | 64079179 | 64079200 | -      | edit    | 7        | 0        | 0.0%  | 0         | 0.0%  | 0         | 0.0%  |
| mmu-mir-465c-1-5p | X   | 64079179 | 64079200 | -      | edit    | 8        | 0        | 0.0%  | 0         | 0.0%  | 0         | 0.0%  |
| mmu-mir-465c-1-5p | X   | 64079179 | 64079200 | -      | edit    | 9        | 0        | 0.0%  | 0         | 0.0%  | 0         | 0.0%  |
| mmu-mir-465c-1-5p | X   | 64079179 | 64079200 | -      | edit    | 10       | 0        | 0.0%  | 0         | 0.0%  | 0         | 0.0%  |
| mmu-mir-465c-1-5p | X   | 64079179 | 64079200 | -      | edit    | 11       | 0        | 0.0%  | 0         | 0.0%  | 0         | 0.0%  |
| mmu-mir-465c-1-5p | X   | 64079179 | 64079200 | -      | edit    | 12       | 0        | 0.0%  | 0         | 0.0%  | 0         | 0.0%  |
| mmu-mir-465c-1-5p | X   | 64079179 | 64079200 | -      | edit    | 13       | 0        | 0.0%  | 0         | 0.0%  | 0         | 0.0%  |
| mmu-mir-465c-1-5p | X   | 64079179 | 64079200 | -      | edit    | 14       | 0        | 0.0%  | 0         | 0.0%  | 0         | 0.0%  |
| mmu-mir-465c-1-5p | X   | 64079179 | 64079200 | -      | edit    | 15       | 5        | 0.4%  | 23        | 0.7%  | 24        | 0.9%  |
| mmu-mir-465c-1-5p | X   | 64079179 | 64079200 | -      | edit    | 16       | 0        | 0.0%  | 0         | 0.0%  | 3         | 0.1%  |
| mmu-mir-465c-1-5p | X   | 64079179 | 64079200 | -      | edit    | 17       | 0        | 0.0%  | 0         | 0.0%  | 0         | 0.0%  |
| mmu-mir-465c-1-5p | X   | 64079179 | 64079200 | -      | edit    | 18       | 0        | 0.0%  | 0         | 0.0%  | 0         | 0.0%  |
| mmu-mir-465c-1-5p | X   | 64079179 | 64079200 | -      | edit    | 19       | 0        | 0.0%  | 3         | 0.1%  | 12        | 0.4%  |
| mmu-mir-465c-1-5p | X   | 64079179 | 64079200 | -      | edit    | 20       | 0        | 0.0%  | 0         | 0.0%  | 0         | 0.0%  |
| mmu-mir-465c-1-5p | X   | 64079179 | 64079200 | -      | edit    | 21       | 0        | 0.0%  | 0         | 0.0%  | 0         | 0.0%  |
| mmu-mir-465c-1-5p | X   | 64079179 | 64079200 | -      | edit    | 22       | 0        | 0.0%  | 0         | 0.0%  | 0         | 0.0%  |
| EDITED            |     |          |          |        |         |          | 5        | 0.4%  | 27        | 0.8%  | 45        | 1.6%  |
| CANONICAL         |     |          |          |        |         |          | 1229     | 99.6% | 3357      | 99.2% | 2724      | 98.4% |
| TOTAL             |     |          |          |        |         |          | 1234     |       | 3384      |       | 2769      |       |

| miRNA             | Chr | Start    | Stop     | Strand | Type  | Position | P7 reads | P7%   | P10 reads | P10%  | P14 reads | P14%  |
|-------------------|-----|----------|----------|--------|-------|----------|----------|-------|-----------|-------|-----------|-------|
| mmu-mir-465c-2-3p | X   | 64085702 | 64085723 | -      | Indel | 22       | 0        | 0.0%  | 0         | 0.0%  | 4         | 0.3%  |
| mmu-mir-465c-2-3p | X   | 64085702 | 64085723 | -      | edit  | 1        | 0        | 0.0%  | 0         | 0.0%  | 0         | 0.0%  |
| mmu-mir-465c-2-3p | X   | 64085702 | 64085723 | -      | edit  | 2        | 0        | 0.0%  | 0         | 0.0%  | 0         | 0.0%  |
| mmu-mir-465c-2-3p | X   | 64085702 | 64085723 | -      | edit  | 3        | 0        | 0.0%  | 0         | 0.0%  | 0         | 0.0%  |
| mmu-mir-465c-2-3p | X   | 64085702 | 64085723 | -      | edit  | 4        | 0        | 0.0%  | 0         | 0.0%  | 0         | 0.0%  |
| mmu-mir-465c-2-3p | X   | 64085702 | 64085723 | -      | edit  | 5        | 0        | 0.0%  | 0         | 0.0%  | 0         | 0.0%  |
| mmu-mir-465c-2-3p | X   | 64085702 | 64085723 | -      | edit  | 6        | 0        | 0.0%  | 0         | 0.0%  | 0         | 0.0%  |
| mmu-mir-465c-2-3p | X   | 64085702 | 64085723 | -      | edit  | 7        | 0        | 0.0%  | 0         | 0.0%  | 0         | 0.0%  |
| mmu-mir-465c-2-3p | X   | 64085702 | 64085723 | -      | edit  | 8        | 0        | 0.0%  | 0         | 0.0%  | 0         | 0.0%  |
| mmu-mir-465c-2-3p | X   | 64085702 | 64085723 | -      | edit  | 9        | 0        | 0.0%  | 0         | 0.0%  | 0         | 0.0%  |
| mmu-mir-465c-2-3p | X   | 64085702 | 64085723 | -      | edit  | 10       | 0        | 0.0%  | 0         | 0.0%  | 0         | 0.0%  |
| mmu-mir-465c-2-3p | X   | 64085702 | 64085723 | -      | edit  | 11       | 0        | 0.0%  | 0         | 0.0%  | 0         | 0.0%  |
| mmu-mir-465c-2-3p | X   | 64085702 | 64085723 | -      | edit  | 12       | 0        | 0.0%  | 0         | 0.0%  | 0         | 0.0%  |
| mmu-mir-465c-2-3p | X   | 64085702 | 64085723 | -      | edit  | 13       | 0        | 0.0%  | 0         | 0.0%  | 0         | 0.0%  |
| mmu-mir-465c-2-3p | X   | 64085702 | 64085723 | -      | edit  | 14       | 0        | 0.0%  | 0         | 0.0%  | 0         | 0.0%  |
| mmu-mir-465c-2-3p | X   | 64085702 | 64085723 | -      | edit  | 15       | 0        | 0.0%  | 0         | 0.0%  | 0         | 0.0%  |
| mmu-mir-465c-2-3p | X   | 64085702 | 64085723 | -      | edit  | 16       | 0        | 0.0%  | 3         | 0.2%  | 0         | 0.0%  |
| mmu-mir-465c-2-3p | X   | 64085702 | 64085723 | -      | edit  | 17       | 0        | 0.0%  | 33        | 1.7%  | 4         | 0.2%  |
| mmu-mir-465c-2-3p | X   | 64085702 | 64085723 | -      | edit  | 18       | 0        | 0.0%  |           | 0.0%  | 0         | 0.0%  |
| mmu-mir-465c-2-3p | X   | 64085702 | 64085723 | -      | edit  | 19       | 4        | 0.6%  | 11        | 0.6%  | 15        | 0.9%  |
| mmu-mir-465c-2-3p | X   | 64085702 | 64085723 | -      | edit  | 20       | 0        | 0.0%  | 0         | 0.0%  | 0         | 0.0%  |
| mmu-mir-465c-2-3p | X   | 64085702 | 64085723 | -      | edit  | 21       | 0        | 0.0%  | 0         | 0.0%  | 0         | 0.0%  |
| mmu-mir-465c-2-3p | X   | 64085702 | 64085723 | -      | edit  | 22       | 0        | 0.0%  | 0         | 0.0%  | 0         | 0.0%  |
| EDITED            |     |          |          |        |       |          | 4        | 0.6%  | 47        | 2.5%  | 23        | 1.4%  |
| CANONICAL         |     |          |          |        |       |          | 717      | 99.4% | 1856      | 97.5% | 1587      | 98.6% |
| TOTAL             |     |          |          |        |       |          | 721      |       | 1903      |       | 1610      |       |



| miRNA             | Chr | Start    | Stop     | Strand | Type    | Position | P7 reads | P7%   | P10 reads | P10%  | P14 reads | P14%  |
|-------------------|-----|----------|----------|--------|---------|----------|----------|-------|-----------|-------|-----------|-------|
| mmu-mir-465c-2-5p | X   | 64085741 | 64085762 | -      | 5' Edit | 5'       | 0        | 0.0%  | 0         | 0.0%  | 6         | 0.2%  |
| mmu-mir-465c-2-5p | X   | 64085741 | 64085762 | -      | edit    | 1        | 0        | 0.0%  | 0         | 0.0%  | 0         | 0.0%  |
| mmu-mir-465c-2-5p | X   | 64085741 | 64085762 | -      | edit    | 2        | 0        | 0.0%  | 0         | 0.0%  | 0         | 0.0%  |
| mmu-mir-465c-2-5p | X   | 64085741 | 64085762 | -      | edit    | 3        | 0        | 0.0%  | 0         | 0.0%  | 0         | 0.0%  |
| mmu-mir-465c-2-5p | X   | 64085741 | 64085762 | -      | edit    | 4        | 0        | 0.0%  | 0         | 0.0%  | 0         | 0.0%  |
| mmu-mir-465c-2-5p | X   | 64085741 | 64085762 | -      | edit    | 5        | 0        | 0.0%  | 0         | 0.0%  | 0         | 0.0%  |
| mmu-mir-465c-2-5p | X   | 64085741 | 64085762 | -      | edit    | 6        | 0        | 0.0%  | 0         | 0.0%  | 0         | 0.0%  |
| mmu-mir-465c-2-5p | X   | 64085741 | 64085762 | -      | edit    | 7        | 0        | 0.0%  | 0         | 0.0%  | 0         | 0.0%  |
| mmu-mir-465c-2-5p | X   | 64085741 | 64085762 | -      | edit    | 8        | 0        | 0.0%  | 0         | 0.0%  | 0         | 0.0%  |
| mmu-mir-465c-2-5p | X   | 64085741 | 64085762 | -      | edit    | 9        | 0        | 0.0%  | 0         | 0.0%  | 0         | 0.0%  |
| mmu-mir-465c-2-5p | X   | 64085741 | 64085762 | -      | edit    | 10       | 0        | 0.0%  | 0         | 0.0%  | 0         | 0.0%  |
| mmu-mir-465c-2-5p | X   | 64085741 | 64085762 | -      | edit    | 11       | 0        | 0.0%  | 0         | 0.0%  | 0         | 0.0%  |
| mmu-mir-465c-2-5p | X   | 64085741 | 64085762 | -      | edit    | 12       | 0        | 0.0%  | 0         | 0.0%  | 0         | 0.0%  |
| mmu-mir-465c-2-5p | X   | 64085741 | 64085762 | -      | edit    | 13       | 0        | 0.0%  | 0         | 0.0%  | 0         | 0.0%  |
| mmu-mir-465c-2-5p | X   | 64085741 | 64085762 | -      | edit    | 14       | 0        | 0.0%  | 0         | 0.0%  | 0         | 0.0%  |
| mmu-mir-465c-2-5p | X   | 64085741 | 64085762 | -      | edit    | 15       | 5        | 0.4%  | 23        | 0.7%  | 24        | 0.9%  |
| mmu-mir-465c-2-5p | X   | 64085741 | 64085762 | -      | edit    | 16       | 0        | 0.0%  | 0         | 0.0%  | 3         | 0.1%  |
| mmu-mir-465c-2-5p | X   | 64085741 | 64085762 | -      | edit    | 17       | 0        | 0.0%  | 0         | 0.0%  | 0         | 0.0%  |
| mmu-mir-465c-2-5p | X   | 64085741 | 64085762 | -      | edit    | 18       | 0        | 0.0%  | 0         | 0.0%  | 0         | 0.0%  |
| mmu-mir-465c-2-5p | X   | 64085741 | 64085762 | -      | edit    | 19       | 0        | 0.0%  | 3         | 0.1%  | 12        | 0.4%  |
| mmu-mir-465c-2-5p | X   | 64085741 | 64085762 | -      | edit    | 20       | 0        | 0.0%  | 0         | 0.0%  | 0         | 0.0%  |
| mmu-mir-465c-2-5p | X   | 64085741 | 64085762 | -      | edit    | 21       | 0        | 0.0%  | 0         | 0.0%  | 0         | 0.0%  |
| mmu-mir-465c-2-5p | X   | 64085741 | 64085762 | -      | edit    | 22       | 0        | 0.0%  | 0         | 0.0%  | 0         | 0.0%  |
| EDITED            |     |          |          |        |         |          | 5        | 0.4%  | 27        | 0.8%  | 45        | 1.6%  |
| CANONICAL         |     |          |          |        |         |          | 1229     | 99.6% | 3357      | 99.2% | 2724      | 98.4% |
| TOTAL             |     |          |          |        |         |          | 1234     |       | 3384      |       | 2769      |       |

| miRNA          | Chr | Start    | Stop     | Strand | Type | Position | P7 reads | P7%   | P10 reads | P10%  | P14 reads | P14%  |
|----------------|-----|----------|----------|--------|------|----------|----------|-------|-----------|-------|-----------|-------|
| mmu-mir-470-5p | X   | 64067170 | 64067192 | -      | edit | 1        | 0        | 0.0%  | 0         | 0.0%  | 0         | 0.0%  |
| mmu-mir-470-5p | X   | 64067170 | 64067192 | -      | edit | 2        | 0        | 0.0%  | 0         | 0.0%  | 0         | 0.0%  |
| mmu-mir-470-5p | X   | 64067170 | 64067192 | -      | edit | 3        | 0        | 0.0%  | 0         | 0.0%  | 0         | 0.0%  |
| mmu-mir-470-5p | X   | 64067170 | 64067192 | -      | edit | 4        | 0        | 0.0%  | 0         | 0.0%  | 0         | 0.0%  |
| mmu-mir-470-5p | X   | 64067170 | 64067192 | -      | edit | 5        | 0        | 0.0%  | 0         | 0.0%  | 0         | 0.0%  |
| mmu-mir-470-5p | X   | 64067170 | 64067192 | -      | edit | 6        | 0        | 0.0%  | 0         | 0.0%  | 0         | 0.0%  |
| mmu-mir-470-5p | X   | 64067170 | 64067192 | -      | edit | 7        | 0        | 0.0%  | 0         | 0.0%  | 0         | 0.0%  |
| mmu-mir-470-5p | X   | 64067170 | 64067192 | -      | edit | 8        | 0        | 0.0%  | 0         | 0.0%  | 0         | 0.0%  |
| mmu-mir-470-5p | X   | 64067170 | 64067192 | -      | edit | 9        | 0        | 0.0%  | 3         | 0.1%  | 8         | 0.1%  |
| mmu-mir-470-5p | X   | 64067170 | 64067192 | -      | edit | 10       | 0        | 0.0%  | 0         | 0.0%  | 0         | 0.0%  |
| mmu-mir-470-5p | X   | 64067170 | 64067192 | -      | edit | 11       | 0        | 0.0%  | 0         | 0.0%  | 0         | 0.0%  |
| mmu-mir-470-5p | X   | 64067170 | 64067192 | -      | edit | 12       | 0        | 0.0%  | 0         | 0.0%  | 0         | 0.0%  |
| mmu-mir-470-5p | X   | 64067170 | 64067192 | -      | edit | 13       | 0        | 0.0%  | 0         | 0.0%  | 4         | 0.1%  |
| mmu-mir-470-5p | X   | 64067170 | 64067192 | -      | edit | 14       | 0        | 0.0%  | 0         | 0.0%  | 0         | 0.0%  |
| mmu-mir-470-5p | X   | 64067170 | 64067192 | -      | edit | 15       | 3        | 0.1%  | 11        | 0.2%  | 11        | 0.2%  |
| mmu-mir-470-5p | X   | 64067170 | 64067192 | -      | edit | 16       | 3        | 0.1%  | 3         | 0.1%  | 4         | 0.1%  |
| mmu-mir-470-5p | X   | 64067170 | 64067192 | -      | edit | 17       | 0        | 0.0%  | 0         | 0.0%  | 0         | 0.0%  |
| mmu-mir-470-5p | X   | 64067170 | 64067192 | -      | edit | 18       | 0        | 0.0%  | 10        | 0.2%  | 3         | 0.0%  |
| mmu-mir-470-5p | X   | 64067170 | 64067192 | -      | edit | 19       | 22       | 1.1%  | 47        | 0.8%  | 123       | 1.9%  |
| mmu-mir-470-5p | X   | 64067170 | 64067192 | -      | edit | 20       | 0        | 0.0%  | 6         | 0.1%  | 5         | 0.1%  |
| mmu-mir-470-5p | X   | 64067170 | 64067192 | -      | edit | 21       | 9        | 0.4%  | 51        | 0.9%  | 46        | 0.7%  |
| mmu-mir-470-5p | X   | 64067170 | 64067192 | -      | edit | 22       | 0        | 0.0%  | 0         | 0.0%  | 5         | 0.1%  |
| mmu-mir-470-5p | X   | 64067170 | 64067192 | -      | edit | 23       | 0        | 0.0%  | 0         | 0.0%  | 5         | 0.1%  |
| EDITED         |     |          |          |        |      |          | 37       | 1.8%  | 131       | 2.2%  | 213       | 3.3%  |
| CANONICAL      |     |          |          |        |      |          | 2090     | 98.2% | 5744      | 97.8% | 6308      | 96.7% |
| TOTAL          |     |          |          |        |      |          | 2127     |       | 5875      |       | 6521      |       |

| miRNA          | Chr | Start     | Stop      | Strand | Type | Position | P7 reads | P7%   | P10 reads | P10%   | P14 reads | P14%   |
|----------------|-----|-----------|-----------|--------|------|----------|----------|-------|-----------|--------|-----------|--------|
| mmu-mir-483-5p | 7   | 149840873 | 149840894 | -      | edit | 1        | 0        | 0.0%  | 0         | 0.0%   | 0         | 0.0%   |
| mmu-mir-483-5p | 7   | 149840873 | 149840894 | -      | edit | 2        | 0        | 0.0%  | 0         | 0.0%   | 0         | 0.0%   |
| mmu-mir-483-5p | 7   | 149840873 | 149840894 | -      | edit | 3        | 0        | 0.0%  | 0         | 0.0%   | 0         | 0.0%   |
| mmu-mir-483-5p | 7   | 149840873 | 149840894 | -      | edit | 4        | 0        | 0.0%  | 0         | 0.0%   | 0         | 0.0%   |
| mmu-mir-483-5p | 7   | 149840873 | 149840894 | -      | edit | 5        | 0        | 0.0%  | 0         | 0.0%   | 0         | 0.0%   |
| mmu-mir-483-5p | 7   | 149840873 | 149840894 | -      | edit | 6        | 0        | 0.0%  | 0         | 0.0%   | 0         | 0.0%   |
| mmu-mir-483-5p | 7   | 149840873 | 149840894 | -      | edit | 7        | 0        | 0.0%  | 0         | 0.0%   | 0         | 0.0%   |
| mmu-mir-483-5p | 7   | 149840873 | 149840894 | -      | edit | 8        | 0        | 0.0%  | 0         | 0.0%   | 0         | 0.0%   |
| mmu-mir-483-5p | 7   | 149840873 | 149840894 | -      | edit | 9        | 0        | 0.0%  | 0         | 0.0%   | 0         | 0.0%   |
| mmu-mir-483-5p | 7   | 149840873 | 149840894 | -      | edit | 10       | 0        | 0.0%  | 0         | 0.0%   | 0         | 0.0%   |
| mmu-mir-483-5p | 7   | 149840873 | 149840894 | -      | edit | 11       | 0        | 0.0%  | 0         | 0.0%   | 0         | 0.0%   |
| mmu-mir-483-5p | 7   | 149840873 | 149840894 | -      | edit | 12       | 0        | 0.0%  | 0         | 0.0%   | 0         | 0.0%   |
| mmu-mir-483-5p | 7   | 149840873 | 149840894 | -      | edit | 13       | 0        | 0.0%  | 0         | 0.0%   | 0         | 0.0%   |
| mmu-mir-483-5p | 7   | 149840873 | 149840894 | -      | edit | 14       | 0        | 0.0%  | 0         | 0.0%   | 0         | 0.0%   |
| mmu-mir-483-5p | 7   | 149840873 | 149840894 | -      | edit | 15       | 0        | 0.0%  | 0         | 0.0%   | 0         | 0.0%   |
| mmu-mir-483-5p | 7   | 149840873 | 149840894 | -      | edit | 16       | 0        | 0.0%  | 0         | 0.0%   | 0         | 0.0%   |
| mmu-mir-483-5p | 7   | 149840873 | 149840894 | -      | edit | 17       | 0        | 0.0%  | 0         | 0.0%   | 0         | 0.0%   |
| mmu-mir-483-5p | 7   | 149840873 | 149840894 | -      | edit | 18       | 0        | 0.0%  | 0         | 0.0%   | 0         | 0.0%   |
| mmu-mir-483-5p | 7   | 149840873 | 149840894 | -      | edit | 19       | 0        | 0.0%  | 0         | 0.0%   | 0         | 0.0%   |
| mmu-mir-483-5p | 7   | 149840873 | 149840894 | -      | edit | 20       | 0        | 0.0%  | 0         | 0.0%   | 0         | 0.0%   |
| mmu-mir-483-5p | 7   | 149840873 | 149840894 | -      | edit | 21       | 0        | 0.0%  | 0         | 0.0%   | 0         | 0.0%   |
| mmu-mir-483-5p | 7   | 149840873 | 149840894 | -      | edit | 22       | 4        | 0.6%  | 0         | 0.0%   | 0         | 0.0%   |
| EDITED         |     |           |           |        |      |          | 4        | 0.6%  | 0         | 0.0%   | 0         | 0.0%   |
| CANONICAL      |     |           |           |        |      |          | 646      | 99.4% | 112       | 100.0% | 66        | 100.0% |
| TOTAL          |     |           |           |        |      |          | 650      |       | 112       |        | 66        |        |

| miRNA          | Chr | Start     | Stop      | Strand | Type | Position | P7 reads | P7%   | P10 reads | P10%   | P14 reads | P14%   |
|----------------|-----|-----------|-----------|--------|------|----------|----------|-------|-----------|--------|-----------|--------|
| mmu-mir-485-3p | 12  | 110973156 | 110973177 | +      | edit | 1        | 0        | 0.0%  | 0         | 0.0%   | 0         | 0.0%   |
| mmu-mir-485-3p | 12  | 110973156 | 110973177 | +      | edit | 2        | 0        | 0.0%  | 0         | 0.0%   | 0         | 0.0%   |
| mmu-mir-485-3p | 12  | 110973156 | 110973177 | +      | edit | 3        | 0        | 0.0%  | 0         | 0.0%   | 0         | 0.0%   |
| mmu-mir-485-3p | 12  | 110973156 | 110973177 | +      | edit | 4        | 0        | 0.0%  | 0         | 0.0%   | 0         | 0.0%   |
| mmu-mir-485-3p | 12  | 110973156 | 110973177 | +      | edit | 5        | 0        | 0.0%  | 0         | 0.0%   | 0         | 0.0%   |
| mmu-mir-485-3p | 12  | 110973156 | 110973177 | +      | edit | 6        | 0        | 0.0%  | 0         | 0.0%   | 0         | 0.0%   |
| mmu-mir-485-3p | 12  | 110973156 | 110973177 | +      | edit | 7        | 0        | 0.0%  | 0         | 0.0%   | 0         | 0.0%   |
| mmu-mir-485-3p | 12  | 110973156 | 110973177 | +      | edit | 8        | 0        | 0.0%  | 0         | 0.0%   | 0         | 0.0%   |
| mmu-mir-485-3p | 12  | 110973156 | 110973177 | +      | edit | 9        | 0        | 0.0%  | 0         | 0.0%   | 0         | 0.0%   |
| mmu-mir-485-3p | 12  | 110973156 | 110973177 | +      | edit | 10       | 0        | 0.0%  | 0         | 0.0%   | 0         | 0.0%   |
| mmu-mir-485-3p | 12  | 110973156 | 110973177 | +      | edit | 11       | 0        | 0.0%  | 0         | 0.0%   | 0         | 0.0%   |
| mmu-mir-485-3p | 12  | 110973156 | 110973177 | +      | edit | 12       | 0        | 0.0%  | 0         | 0.0%   | 0         | 0.0%   |
| mmu-mir-485-3p | 12  | 110973156 | 110973177 | +      | edit | 13       | 0        | 0.0%  | 0         | 0.0%   | 0         | 0.0%   |
| mmu-mir-485-3p | 12  | 110973156 | 110973177 | +      | edit | 14       | 0        | 0.0%  | 0         | 0.0%   | 0         | 0.0%   |
| mmu-mir-485-3p | 12  | 110973156 | 110973177 | +      | edit | 15       | 0        | 0.0%  | 0         | 0.0%   | 0         | 0.0%   |
| mmu-mir-485-3p | 12  | 110973156 | 110973177 | +      | edit | 16       | 5        | 0.4%  | 0         | 0.0%   | 0         | 0.0%   |
| mmu-mir-485-3p | 12  | 110973156 | 110973177 | +      | edit | 17       | 0        | 0.0%  | 0         | 0.0%   | 0         | 0.0%   |
| mmu-mir-485-3p | 12  | 110973156 | 110973177 | +      | edit | 18       | 0        | 0.0%  | 0         | 0.0%   | 0         | 0.0%   |
| mmu-mir-485-3p | 12  | 110973156 | 110973177 | +      | edit | 19       | 3        | 0.2%  | 0         | 0.0%   | 0         | 0.0%   |
| mmu-mir-485-3p | 12  | 110973156 | 110973177 | +      | edit | 20       | 5        | 0.4%  | 0         | 0.0%   | 0         | 0.0%   |
| mmu-mir-485-3p | 12  | 110973156 | 110973177 | +      | edit | 21       | 0        | 0.0%  | 0         | 0.0%   | 0         | 0.0%   |
| mmu-mir-485-3p | 12  | 110973156 | 110973177 | +      | edit | 22       | 4        | 0.3%  | 0         | 0.0%   | 0         | 0.0%   |
| EDITED         |     |           |           |        |      |          | 17       | 1.3%  | 0         | 0.0%   | 0         | 0.0%   |
| CANONICAL      |     |           |           |        |      |          | 1266     | 98.7% | 254       | 100.0% | 113       | 100.0% |
| TOTAL          |     |           |           |        |      |          | 1283     |       | 254       |        | 113       |        |

| miRNA          | Chr | Start     | Stop      | Strand | Type | Position | P7 reads  | P7%         | P10 reads | P10%         | P14 reads | P14%        |
|----------------|-----|-----------|-----------|--------|------|----------|-----------|-------------|-----------|--------------|-----------|-------------|
| mmu-mir-485-5p | 12  | 110973120 | 110973141 | +      | edit | 1        | 0         | 0.0%        | 0         | 0.0%         | 0         | 0.0%        |
| mmu-mir-485-5p | 12  | 110973120 | 110973141 | +      | edit | 2        | 0         | 0.0%        | 0         | 0.0%         | 0         | 0.0%        |
| mmu-mir-485-5p | 12  | 110973120 | 110973141 | +      | edit | 3        | 0         | 0.0%        | 0         | 0.0%         | 0         | 0.0%        |
| mmu-mir-485-5p | 12  | 110973120 | 110973141 | +      | edit | 4        | 0         | 0.0%        | 0         | 0.0%         | 0         | 0.0%        |
| mmu-mir-485-5p | 12  | 110973120 | 110973141 | +      | edit | 5        | 0         | 0.0%        | 0         | 0.0%         | 0         | 0.0%        |
| mmu-mir-485-5p | 12  | 110973120 | 110973141 | +      | edit | 6        | 0         | 0.0%        | 0         | 0.0%         | 0         | 0.0%        |
| mmu-mir-485-5p | 12  | 110973120 | 110973141 | +      | edit | 7        | 0         | 0.0%        | 0         | 0.0%         | 0         | 0.0%        |
| mmu-mir-485-5p | 12  | 110973120 | 110973141 | +      | edit | 8        | 0         | 0.0%        | 0         | 0.0%         | 0         | 0.0%        |
| mmu-mir-485-5p | 12  | 110973120 | 110973141 | +      | edit | 9        | 0         | 0.0%        | 0         | 0.0%         | 0         | 0.0%        |
| mmu-mir-485-5p | 12  | 110973120 | 110973141 | +      | edit | 10       | 0         | 0.0%        | 0         | 0.0%         | 0         | 0.0%        |
| mmu-mir-485-5p | 12  | 110973120 | 110973141 | +      | edit | 11       | 0         | 0.0%        | 0         | 0.0%         | 0         | 0.0%        |
| mmu-mir-485-5p | 12  | 110973120 | 110973141 | +      | edit | 12       | 0         | 0.0%        | 0         | 0.0%         | 0         | 0.0%        |
| mmu-mir-485-5p | 12  | 110973120 | 110973141 | +      | edit | 13       | 21        | 0.8%        | 0         | 0.0%         | 0         | 0.0%        |
| mmu-mir-485-5p | 12  | 110973120 | 110973141 | +      | edit | 14       | 0         | 0.0%        | 0         | 0.0%         | 0         | 0.0%        |
| mmu-mir-485-5p | 12  | 110973120 | 110973141 | +      | edit | 15       | <b>73</b> | <b>2.8%</b> | <b>72</b> | <b>10.4%</b> | <b>13</b> | <b>4.8%</b> |
| mmu-mir-485-5p | 12  | 110973120 | 110973141 | +      | edit | 16       | 0         | 0.0%        | 0         | 0.0%         | 0         | 0.0%        |
| mmu-mir-485-5p | 12  | 110973120 | 110973141 | +      | edit | 17       | 0         | 0.0%        | 0         | 0.0%         | 0         | 0.0%        |
| mmu-mir-485-5p | 12  | 110973120 | 110973141 | +      | edit | 18       | 0         | 0.0%        | 0         | 0.0%         | 0         | 0.0%        |
| mmu-mir-485-5p | 12  | 110973120 | 110973141 | +      | edit | 19       | 12        | 0.4%        | 15        | 2.2%         | 0         | 0.0%        |
| mmu-mir-485-5p | 12  | 110973120 | 110973141 | +      | edit | 20       | 0         | 0.0%        | 0         | 0.0%         | 0         | 0.0%        |
| mmu-mir-485-5p | 12  | 110973120 | 110973141 | +      | edit | 21       | 0         | 0.0%        | 0         | 0.0%         | 0         | 0.0%        |
| mmu-mir-485-5p | 12  | 110973120 | 110973141 | +      | edit | 22       | 0         | 0.0%        | 0         | 0.0%         | 0         | 0.0%        |
| EDITED         |     |           |           |        |      |          | 105       | 4.0%        | 87        | 12.5%        | 13        | 4.8%        |
| CANONICAL      |     |           |           |        |      |          | 2492      | 96.0%       | 608       | 87.5%        | 259       | 95.2%       |
| TOTAL          |     |           |           |        |      |          | 2597      |             | 695       |              | 272       |             |

| miRNA          | Chr | Start    | Stop     | Strand | Type     | Position | P7 reads | P7%   | P10 reads | P10%  | P14 reads | P14%  |
|----------------|-----|----------|----------|--------|----------|----------|----------|-------|-----------|-------|-----------|-------|
| mmu-mir-503-5p | X   | 50407204 | 50407226 | -      | 5' Edit  | 5'       | 20       | 0.2%  | 0         | 0.0%  | 0         | 0.0%  |
| mmu-mir-503-5p | X   | 50407204 | 50407226 | -      | 5' Indel | 5'       | 18       | 0.2%  | 0         | 0.0%  | 9         | 0.6%  |
| mmu-mir-503-5p | X   | 50407204 | 50407226 | -      | edit     | 1        | 0        | 0.0%  | 0         | 0.0%  | 0         | 0.0%  |
| mmu-mir-503-5p | X   | 50407204 | 50407226 | -      | edit     | 2        | 0        | 0.0%  | 0         | 0.0%  | 0         | 0.0%  |
| mmu-mir-503-5p | X   | 50407204 | 50407226 | -      | edit     | 3        | 0        | 0.0%  | 0         | 0.0%  | 0         | 0.0%  |
| mmu-mir-503-5p | X   | 50407204 | 50407226 | -      | edit     | 4        | 3        | 0.0%  | 0         | 0.0%  | 0         | 0.0%  |
| mmu-mir-503-5p | X   | 50407204 | 50407226 | -      | edit     | 5        | 0        | 0.0%  | 0         | 0.0%  | 0         | 0.0%  |
| mmu-mir-503-5p | X   | 50407204 | 50407226 | -      | edit     | 6        | 0        | 0.0%  | 0         | 0.0%  | 0         | 0.0%  |
| mmu-mir-503-5p | X   | 50407204 | 50407226 | -      | edit     | 7        | 0        | 0.0%  | 0         | 0.0%  | 0         | 0.0%  |
| mmu-mir-503-5p | X   | 50407204 | 50407226 | -      | edit     | 8        | 6        | 0.1%  | 0         | 0.0%  | 0         | 0.0%  |
| mmu-mir-503-5p | X   | 50407204 | 50407226 | -      | edit     | 9        | 4        | 0.0%  | 0         | 0.0%  | 0         | 0.0%  |
| mmu-mir-503-5p | X   | 50407204 | 50407226 | -      | edit     | 10       | 0        | 0.0%  | 0         | 0.0%  | 0         | 0.0%  |
| mmu-mir-503-5p | X   | 50407204 | 50407226 | -      | edit     | 11       | 0        | 0.0%  | 0         | 0.0%  | 0         | 0.0%  |
| mmu-mir-503-5p | X   | 50407204 | 50407226 | -      | edit     | 12       | 0        | 0.0%  | 0         | 0.0%  | 0         | 0.0%  |
| mmu-mir-503-5p | X   | 50407204 | 50407226 | -      | edit     | 13       | 31       | 0.3%  | 10        | 0.2%  | 7         | 0.5%  |
| mmu-mir-503-5p | X   | 50407204 | 50407226 | -      | edit     | 14       | 0        | 0.0%  | 0         | 0.0%  | 0         | 0.0%  |
| mmu-mir-503-5p | X   | 50407204 | 50407226 | -      | edit     | 15       | 9        | 0.1%  | 5         | 0.1%  | 0         | 0.0%  |
| mmu-mir-503-5p | X   | 50407204 | 50407226 | -      | edit     | 16       | 149      | 1.4%  | 80        | 1.7%  | 22        | 1.5%  |
| mmu-mir-503-5p | X   | 50407204 | 50407226 | -      | edit     | 17       | 3        | 0.0%  | 20        | 0.4%  | 0         | 0.0%  |
| mmu-mir-503-5p | X   | 50407204 | 50407226 | -      | edit     | 18       | 88       | 0.8%  | 58        | 1.2%  | 24        | 1.6%  |
| mmu-mir-503-5p | X   | 50407204 | 50407226 | -      | edit     | 19       | 139      | 1.3%  | 53        | 1.1%  | 30        | 2.0%  |
| mmu-mir-503-5p | X   | 50407204 | 50407226 | -      | edit     | 20       | 5        | 0.0%  | 3         | 0.1%  | 0         | 0.0%  |
| mmu-mir-503-5p | X   | 50407204 | 50407226 | -      | edit     | 21       | 50       | 0.5%  | 26        | 0.5%  | 16        | 1.1%  |
| mmu-mir-503-5p | X   | 50407204 | 50407226 | -      | edit     | 22       | 0        | 0.0%  | 0         | 0.0%  | 0         | 0.0%  |
| EDITED         |     |          |          |        |          |          | 525      | 4.8%  | 254       | 5.3%  | 108       | 7.3%  |
| CANONICAL      |     |          |          |        |          |          | 10470    | 95.2% | 4502      | 94.7% | 1373      | 92.7% |
| TOTAL          |     |          |          |        |          |          | 10995    |       | 4756      |       | 1481      |       |

| miRNA          | Chr | Start   | Stop    | Strand | Type | Position | P7 reads  | P7%         | P10 reads | P10%         | P14 reads | P14%         |
|----------------|-----|---------|---------|--------|------|----------|-----------|-------------|-----------|--------------|-----------|--------------|
| mmu-mir-532-5p | X   | 6825582 | 6825603 | -      | edit | 1        | 0         | 0.0%        | 0         | 0.0%         | 0         | 0.0%         |
| mmu-mir-532-5p | X   | 6825582 | 6825603 | -      | edit | 2        | 0         | 0.0%        | 0         | 0.0%         | 0         | 0.0%         |
| mmu-mir-532-5p | X   | 6825582 | 6825603 | -      | edit | 3        | 0         | 0.0%        | 0         | 0.0%         | 0         | 0.0%         |
| mmu-mir-532-5p | X   | 6825582 | 6825603 | -      | edit | 4        | 0         | 0.0%        | 0         | 0.0%         | 0         | 0.0%         |
| mmu-mir-532-5p | X   | 6825582 | 6825603 | -      | edit | 5        | 0         | 0.0%        | 0         | 0.0%         | 0         | 0.0%         |
| mmu-mir-532-5p | X   | 6825582 | 6825603 | -      | edit | 6        | 0         | 0.0%        | 0         | 0.0%         | 0         | 0.0%         |
| mmu-mir-532-5p | X   | 6825582 | 6825603 | -      | edit | 7        | 0         | 0.0%        | 0         | 0.0%         | 0         | 0.0%         |
| mmu-mir-532-5p | X   | 6825582 | 6825603 | -      | edit | 8        | 0         | 0.0%        | 0         | 0.0%         | 0         | 0.0%         |
| mmu-mir-532-5p | X   | 6825582 | 6825603 | -      | edit | 9        | 0         | 0.0%        | 0         | 0.0%         | 0         | 0.0%         |
| mmu-mir-532-5p | X   | 6825582 | 6825603 | -      | edit | 10       | 0         | 0.0%        | 0         | 0.0%         | 0         | 0.0%         |
| mmu-mir-532-5p | X   | 6825582 | 6825603 | -      | edit | 11       | 0         | 0.0%        | 0         | 0.0%         | 0         | 0.0%         |
| mmu-mir-532-5p | X   | 6825582 | 6825603 | -      | edit | 12       | 0         | 0.0%        | 0         | 0.0%         | 0         | 0.0%         |
| mmu-mir-532-5p | X   | 6825582 | 6825603 | -      | edit | 13       | 0         | 0.0%        | 0         | 0.0%         | 0         | 0.0%         |
| mmu-mir-532-5p | X   | 6825582 | 6825603 | -      | edit | 14       | 0         | 0.0%        | 0         | 0.0%         | 0         | 0.0%         |
| mmu-mir-532-5p | X   | 6825582 | 6825603 | -      | edit | 15       | 0         | 0.0%        | 0         | 0.0%         | 0         | 0.0%         |
| mmu-mir-532-5p | X   | 6825582 | 6825603 | -      | edit | 16       | 0         | 0.0%        | 0         | 0.0%         | 0         | 0.0%         |
| mmu-mir-532-5p | X   | 6825582 | 6825603 | -      | edit | 17       | 0         | 0.0%        | 0         | 0.0%         | 0         | 0.0%         |
| mmu-mir-532-5p | X   | 6825582 | 6825603 | -      | edit | 18       | 0         | 0.0%        | 0         | 0.0%         | 0         | 0.0%         |
| mmu-mir-532-5p | X   | 6825582 | 6825603 | -      | edit | 19       | <b>48</b> | <b>6.3%</b> | <b>39</b> | <b>10.8%</b> | <b>52</b> | <b>13.8%</b> |
| mmu-mir-532-5p | X   | 6825582 | 6825603 | -      | edit | 20       | 0         | 0.0%        | 0         | 0.0%         | 0         | 0.0%         |
| mmu-mir-532-5p | X   | 6825582 | 6825603 | -      | edit | 21       | 0         | 0.0%        | 0         | 0.0%         | 0         | 0.0%         |
| mmu-mir-532-5p | X   | 6825582 | 6825603 | -      | edit | 22       | 0         | 0.0%        | 0         | 0.0%         | 0         | 0.0%         |
| EDITED         |     |         |         |        |      |          | 48        | 6.3%        | 39        | 10.8%        | 52        | 13.8%        |
| CANONICAL      |     |         |         |        |      |          | 712       | 93.7%       | 323       | 89.2%        | 325       | 86.2%        |
| TOTAL          |     |         |         |        |      |          | 760       |             | 362       |              | 377       |              |

| miRNA          | Chr | Start     | Stop      | Strand | Type | Position | P7 reads | P7%   | P10 reads | P10%  | P14 reads | P14%  |
|----------------|-----|-----------|-----------|--------|------|----------|----------|-------|-----------|-------|-----------|-------|
| mmu-mir-541-5p | 12  | 110980632 | 110980656 | +      | edit | 1        | 0        | 0.0%  | 0         | 0.0%  | 0         | 0.0%  |
| mmu-mir-541-5p | 12  | 110980632 | 110980656 | +      | edit | 2        | 0        | 0.0%  | 0         | 0.0%  | 0         | 0.0%  |
| mmu-mir-541-5p | 12  | 110980632 | 110980656 | +      | edit | 3        | 0        | 0.0%  | 0         | 0.0%  | 0         | 0.0%  |
| mmu-mir-541-5p | 12  | 110980632 | 110980656 | +      | edit | 4        | 0        | 0.0%  | 0         | 0.0%  | 0         | 0.0%  |
| mmu-mir-541-5p | 12  | 110980632 | 110980656 | +      | edit | 5        | 0        | 0.0%  | 0         | 0.0%  | 0         | 0.0%  |
| mmu-mir-541-5p | 12  | 110980632 | 110980656 | +      | edit | 6        | 0        | 0.0%  | 0         | 0.0%  | 0         | 0.0%  |
| mmu-mir-541-5p | 12  | 110980632 | 110980656 | +      | edit | 7        | 0        | 0.0%  | 0         | 0.0%  | 0         | 0.0%  |
| mmu-mir-541-5p | 12  | 110980632 | 110980656 | +      | edit | 8        | 4        | 0.1%  | 0         | 0.0%  | 0         | 0.0%  |
| mmu-mir-541-5p | 12  | 110980632 | 110980656 | +      | edit | 9        | 0        | 0.0%  | 0         | 0.0%  | 0         | 0.0%  |
| mmu-mir-541-5p | 12  | 110980632 | 110980656 | +      | edit | 10       | 0        | 0.0%  | 0         | 0.0%  | 0         | 0.0%  |
| mmu-mir-541-5p | 12  | 110980632 | 110980656 | +      | edit | 11       | 0        | 0.0%  | 0         | 0.0%  | 0         | 0.0%  |
| mmu-mir-541-5p | 12  | 110980632 | 110980656 | +      | edit | 12       | 0        | 0.0%  | 0         | 0.0%  | 0         | 0.0%  |
| mmu-mir-541-5p | 12  | 110980632 | 110980656 | +      | edit | 13       | 0        | 0.0%  | 0         | 0.0%  | 0         | 0.0%  |
| mmu-mir-541-5p | 12  | 110980632 | 110980656 | +      | edit | 14       | 0        | 0.0%  | 0         | 0.0%  | 0         | 0.0%  |
| mmu-mir-541-5p | 12  | 110980632 | 110980656 | +      | edit | 15       | 25       | 0.4%  | 0         | 0.0%  | 4         | 0.6%  |
| mmu-mir-541-5p | 12  | 110980632 | 110980656 | +      | edit | 16       | 0        | 0.0%  | 0         | 0.0%  | 0         | 0.0%  |
| mmu-mir-541-5p | 12  | 110980632 | 110980656 | +      | edit | 17       | 0        | 0.0%  | 0         | 0.0%  | 0         | 0.0%  |
| mmu-mir-541-5p | 12  | 110980632 | 110980656 | +      | edit | 18       | 0        | 0.0%  | 0         | 0.0%  | 0         | 0.0%  |
| mmu-mir-541-5p | 12  | 110980632 | 110980656 | +      | edit | 19       | 44       | 0.8%  | 9         | 0.6%  | 5         | 0.7%  |
| mmu-mir-541-5p | 12  | 110980632 | 110980656 | +      | edit | 20       | 6        | 0.1%  | 0         | 0.0%  | 0         | 0.0%  |
| mmu-mir-541-5p | 12  | 110980632 | 110980656 | +      | edit | 21       | 5        | 0.1%  | 11        | 0.7%  | 0         | 0.0%  |
| mmu-mir-541-5p | 12  | 110980632 | 110980656 | +      | edit | 22       | 16       | 0.3%  | 0         | 0.0%  | 0         | 0.0%  |
| mmu-mir-541-5p | 12  | 110980632 | 110980656 | +      | edit | 23       | 3        | 0.1%  | 0         | 0.0%  | 0         | 0.0%  |
| EDITED         |     |           |           |        |      |          | 102      | 1.8%  | 20        | 1.3%  | 9         | 1.3%  |
| CANONICAL      |     |           |           |        |      |          | 5528     | 98.2% | 1539      | 98.7% | 716       | 98.7% |
| TOTAL          |     |           |           |        |      |          | 5630     |       | 1559      |       | 725       |       |



| miRNA          | Chr | Start     | Stop      | Strand | Type | Position | P7 reads | P7%   | P10 reads | P10%   | P14 reads | P14%   |
|----------------|-----|-----------|-----------|--------|------|----------|----------|-------|-----------|--------|-----------|--------|
| mmu-mir-543-5p | 12  | 110955514 | 110955535 | +      | edit | 1        | 0        | 0.0%  | 0         | 0.0%   | 0         | 0.0%   |
| mmu-mir-543-5p | 12  | 110955514 | 110955535 | +      | edit | 2        | 0        | 0.0%  | 0         | 0.0%   | 0         | 0.0%   |
| mmu-mir-543-5p | 12  | 110955514 | 110955535 | +      | edit | 3        | 0        | 0.0%  | 0         | 0.0%   | 0         | 0.0%   |
| mmu-mir-543-5p | 12  | 110955514 | 110955535 | +      | edit | 4        | 0        | 0.0%  | 0         | 0.0%   | 0         | 0.0%   |
| mmu-mir-543-5p | 12  | 110955514 | 110955535 | +      | edit | 5        | 0        | 0.0%  | 0         | 0.0%   | 0         | 0.0%   |
| mmu-mir-543-5p | 12  | 110955514 | 110955535 | +      | edit | 6        | 0        | 0.0%  | 0         | 0.0%   | 0         | 0.0%   |
| mmu-mir-543-5p | 12  | 110955514 | 110955535 | +      | edit | 7        | 0        | 0.0%  | 0         | 0.0%   | 0         | 0.0%   |
| mmu-mir-543-5p | 12  | 110955514 | 110955535 | +      | edit | 8        | 0        | 0.0%  | 0         | 0.0%   | 0         | 0.0%   |
| mmu-mir-543-5p | 12  | 110955514 | 110955535 | +      | edit | 9        | 0        | 0.0%  | 0         | 0.0%   | 0         | 0.0%   |
| mmu-mir-543-5p | 12  | 110955514 | 110955535 | +      | edit | 10       | 0        | 0.0%  | 0         | 0.0%   | 0         | 0.0%   |
| mmu-mir-543-5p | 12  | 110955514 | 110955535 | +      | edit | 11       | 0        | 0.0%  | 0         | 0.0%   | 0         | 0.0%   |
| mmu-mir-543-5p | 12  | 110955514 | 110955535 | +      | edit | 12       | 0        | 0.0%  | 0         | 0.0%   | 0         | 0.0%   |
| mmu-mir-543-5p | 12  | 110955514 | 110955535 | +      | edit | 13       | 0        | 0.0%  | 0         | 0.0%   | 0         | 0.0%   |
| mmu-mir-543-5p | 12  | 110955514 | 110955535 | +      | edit | 14       | 0        | 0.0%  | 0         | 0.0%   | 0         | 0.0%   |
| mmu-mir-543-5p | 12  | 110955514 | 110955535 | +      | edit | 15       | 11       | 0.8%  | 0         | 0.0%   | 0         | 0.0%   |
| mmu-mir-543-5p | 12  | 110955514 | 110955535 | +      | edit | 16       | 0        | 0.0%  | 0         | 0.0%   | 0         | 0.0%   |
| mmu-mir-543-5p | 12  | 110955514 | 110955535 | +      | edit | 17       | 0        | 0.0%  | 0         | 0.0%   | 0         | 0.0%   |
| mmu-mir-543-5p | 12  | 110955514 | 110955535 | +      | edit | 18       | 0        | 0.0%  | 0         | 0.0%   | 0         | 0.0%   |
| mmu-mir-543-5p | 12  | 110955514 | 110955535 | +      | edit | 19       | 3        | 0.2%  | 0         | 0.0%   | 0         | 0.0%   |
| mmu-mir-543-5p | 12  | 110955514 | 110955535 | +      | edit | 20       | 0        | 0.0%  | 0         | 0.0%   | 0         | 0.0%   |
| mmu-mir-543-5p | 12  | 110955514 | 110955535 | +      | edit | 21       | 0        | 0.0%  | 0         | 0.0%   | 0         | 0.0%   |
| mmu-mir-543-5p | 12  | 110955514 | 110955535 | +      | edit | 22       | 0        | 0.0%  | 0         | 0.0%   | 0         | 0.0%   |
| EDITED         |     |           |           |        |      |          | 14       | 1.0%  | 0         | 0.0%   | 0         | 0.0%   |
| CANONICAL      |     |           |           |        |      |          | 1359     | 99.0% | 286       | 100.0% | 91        | 100.0% |
| TOTAL          |     |           |           |        |      |          | 1373     |       | 286       |        | 91        |        |

| miRNA          | Chr | Start    | Stop     | Strand | Type | Position | P7 reads | P7%   | P10 reads | P10%   | P14 reads | P14%  |
|----------------|-----|----------|----------|--------|------|----------|----------|-------|-----------|--------|-----------|-------|
| mmu-mir-598-5p | 14  | 64346073 | 64346094 | +      | edit | 1        | 0        | 0.0%  | 0         | 0.0%   | 0         | 0.0%  |
| mmu-mir-598-5p | 14  | 64346073 | 64346094 | +      | edit | 2        | 0        | 0.0%  | 0         | 0.0%   | 0         | 0.0%  |
| mmu-mir-598-5p | 14  | 64346073 | 64346094 | +      | edit | 3        | 0        | 0.0%  | 0         | 0.0%   | 0         | 0.0%  |
| mmu-mir-598-5p | 14  | 64346073 | 64346094 | +      | edit | 4        | 0        | 0.0%  | 0         | 0.0%   | 0         | 0.0%  |
| mmu-mir-598-5p | 14  | 64346073 | 64346094 | +      | edit | 5        | 0        | 0.0%  | 0         | 0.0%   | 0         | 0.0%  |
| mmu-mir-598-5p | 14  | 64346073 | 64346094 | +      | edit | 6        | 0        | 0.0%  | 0         | 0.0%   | 0         | 0.0%  |
| mmu-mir-598-5p | 14  | 64346073 | 64346094 | +      | edit | 7        | 0        | 0.0%  | 0         | 0.0%   | 0         | 0.0%  |
| mmu-mir-598-5p | 14  | 64346073 | 64346094 | +      | edit | 8        | 0        | 0.0%  | 0         | 0.0%   | 0         | 0.0%  |
| mmu-mir-598-5p | 14  | 64346073 | 64346094 | +      | edit | 9        | 0        | 0.0%  | 0         | 0.0%   | 0         | 0.0%  |
| mmu-mir-598-5p | 14  | 64346073 | 64346094 | +      | edit | 10       | 0        | 0.0%  | 0         | 0.0%   | 0         | 0.0%  |
| mmu-mir-598-5p | 14  | 64346073 | 64346094 | +      | edit | 11       | 0        | 0.0%  | 0         | 0.0%   | 0         | 0.0%  |
| mmu-mir-598-5p | 14  | 64346073 | 64346094 | +      | edit | 12       | 0        | 0.0%  | 0         | 0.0%   | 0         | 0.0%  |
| mmu-mir-598-5p | 14  | 64346073 | 64346094 | +      | edit | 13       | 0        | 0.0%  | 0         | 0.0%   | 0         | 0.0%  |
| mmu-mir-598-5p | 14  | 64346073 | 64346094 | +      | edit | 14       | 0        | 0.0%  | 0         | 0.0%   | 0         | 0.0%  |
| mmu-mir-598-5p | 14  | 64346073 | 64346094 | +      | edit | 15       | 0        | 0.0%  | 0         | 0.0%   | 4         | 0.7%  |
| mmu-mir-598-5p | 14  | 64346073 | 64346094 | +      | edit | 16       | 0        | 0.0%  | 0         | 0.0%   | 0         | 0.0%  |
| mmu-mir-598-5p | 14  | 64346073 | 64346094 | +      | edit | 17       | 0        | 0.0%  | 0         | 0.0%   | 0         | 0.0%  |
| mmu-mir-598-5p | 14  | 64346073 | 64346094 | +      | edit | 18       | 0        | 0.0%  | 0         | 0.0%   | 0         | 0.0%  |
| mmu-mir-598-5p | 14  | 64346073 | 64346094 | +      | edit | 19       | 3        | 0.5%  | 0         | 0.0%   | 0         | 0.0%  |
| mmu-mir-598-5p | 14  | 64346073 | 64346094 | +      | edit | 20       | 0        | 0.0%  | 0         | 0.0%   | 0         | 0.0%  |
| mmu-mir-598-5p | 14  | 64346073 | 64346094 | +      | edit | 21       | 0        | 0.0%  | 0         | 0.0%   | 0         | 0.0%  |
| mmu-mir-598-5p | 14  | 64346073 | 64346094 | +      | edit | 22       | 0        | 0.0%  | 0         | 0.0%   | 0         | 0.0%  |
| EDITED         |     |          |          |        |      |          | 3        | 0.5%  | 0         | 0.0%   | 4         | 0.7%  |
| CANONICAL      |     |          |          |        |      |          | 616      | 99.5% | 574       | 100.0% | 575       | 99.3% |
| TOTAL          |     |          |          |        |      |          | 619      |       | 574       |        | 579       |       |

| miRNA          | Chr | Start     | Stop      | Strand | Type | Position | P7 reads | P7%         | P10 reads | P10%        | P14 reads | P14%        |
|----------------|-----|-----------|-----------|--------|------|----------|----------|-------------|-----------|-------------|-----------|-------------|
| mmu-mir-668-5p | 12  | 110972984 | 110973007 | +      | edit | 1        | 0        | 0.0%        | 0         | 0.0%        | 0         | 0.0%        |
| mmu-mir-668-5p | 12  | 110972984 | 110973007 | +      | edit | 2        | 0        | 0.0%        | 0         | 0.0%        | 0         | 0.0%        |
| mmu-mir-668-5p | 12  | 110972984 | 110973007 | +      | edit | 3        | 0        | 0.0%        | 0         | 0.0%        | 0         | 0.0%        |
| mmu-mir-668-5p | 12  | 110972984 | 110973007 | +      | edit | 4        | 0        | 0.0%        | 0         | 0.0%        | 0         | 0.0%        |
| mmu-mir-668-5p | 12  | 110972984 | 110973007 | +      | edit | 5        | 0        | 0.0%        | 0         | 0.0%        | 0         | 0.0%        |
| mmu-mir-668-5p | 12  | 110972984 | 110973007 | +      | edit | 6        | 0        | 0.0%        | 0         | 0.0%        | 0         | 0.0%        |
| mmu-mir-668-5p | 12  | 110972984 | 110973007 | +      | edit | 7        | 0        | 0.0%        | 0         | 0.0%        | 0         | 0.0%        |
| mmu-mir-668-5p | 12  | 110972984 | 110973007 | +      | edit | 8        | 0        | 0.0%        | 0         | 0.0%        | 0         | 0.0%        |
| mmu-mir-668-5p | 12  | 110972984 | 110973007 | +      | edit | 9        | 0        | 0.0%        | 0         | 0.0%        | 0         | 0.0%        |
| mmu-mir-668-5p | 12  | 110972984 | 110973007 | +      | edit | 10       | 0        | 0.0%        | 0         | 0.0%        | 0         | 0.0%        |
| mmu-mir-668-5p | 12  | 110972984 | 110973007 | +      | edit | 11       | 0        | 0.0%        | 0         | 0.0%        | 0         | 0.0%        |
| mmu-mir-668-5p | 12  | 110972984 | 110973007 | +      | edit | 12       | 0        | 0.0%        | 0         | 0.0%        | 0         | 0.0%        |
| mmu-mir-668-5p | 12  | 110972984 | 110973007 | +      | edit | 13       | 0        | 0.0%        | 0         | 0.0%        | 0         | 0.0%        |
| mmu-mir-668-5p | 12  | 110972984 | 110973007 | +      | edit | 14       | 0        | 0.0%        | 0         | 0.0%        | 0         | 0.0%        |
| mmu-mir-668-5p | 12  | 110972984 | 110973007 | +      | edit | 15       | 0        | 0.0%        | 0         | 0.0%        | 0         | 0.0%        |
| mmu-mir-668-5p | 12  | 110972984 | 110973007 | +      | edit | 16       | 0        | 0.0%        | 0         | 0.0%        | 0         | 0.0%        |
| mmu-mir-668-5p | 12  | 110972984 | 110973007 | +      | edit | 17       | 3        | 1.5%        | 3         | 3.1%        | 0         | 0.0%        |
| mmu-mir-668-5p | 12  | 110972984 | 110973007 | +      | edit | 18       | 0        | 0.0%        | 0         | 0.0%        | 0         | 0.0%        |
| mmu-mir-668-5p | 12  | 110972984 | 110973007 | +      | edit | 19       | <b>7</b> | <b>3.5%</b> | <b>8</b>  | <b>8.2%</b> | <b>0</b>  | <b>0.0%</b> |
| mmu-mir-668-5p | 12  | 110972984 | 110973007 | +      | edit | 20       | 0        | 0.0%        | 0         | 0.0%        | 0         | 0.0%        |
| mmu-mir-668-5p | 12  | 110972984 | 110973007 | +      | edit | 21       | 0        | 0.0%        | 0         | 0.0%        | 0         | 0.0%        |
| mmu-mir-668-5p | 12  | 110972984 | 110973007 | +      | edit | 22       | 0        | 0.0%        | 0         | 0.0%        | 0         | 0.0%        |
| EDITED         |     |           |           |        |      |          | 10       | 5.0%        | 11        | 11.3%       | 0         | 0.0%        |
| CANONICAL      |     |           |           |        |      |          | 192      | 95.0%       | 86        | 88.7%       | 16        | 100.0%      |
| TOTAL          |     |           |           |        |      |          | 202      |             | 97        |             | 16        |             |

| miRNA           | Chr | Start    | Stop     | Strand | Type    | Position | P7 reads | P7%   | P10 reads | P10%  | P14 reads | P14%  |
|-----------------|-----|----------|----------|--------|---------|----------|----------|-------|-----------|-------|-----------|-------|
| mmu-mir-669c-5p | 2   | 10430946 | 10430967 | +      | 3' Edit | 3'       | 64       | 0.6%  | 0         | 0.0%  | 34        | 0.4%  |
| mmu-mir-669c-5p | 2   | 10430946 | 10430967 | +      | Indel   | 22       | 4        | 0.0%  | 9         | 0.1%  | 6         | 0.1%  |
| mmu-mir-669c-5p | 2   | 10430946 | 10430967 | +      | edit    | 1        | 0        | 0.0%  | 0         | 0.0%  | 0         | 0.0%  |
| mmu-mir-669c-5p | 2   | 10430946 | 10430967 | +      | edit    | 2        | 0        | 0.0%  | 0         | 0.0%  | 0         | 0.0%  |
| mmu-mir-669c-5p | 2   | 10430946 | 10430967 | +      | edit    | 3        | 0        | 0.0%  | 0         | 0.0%  | 0         | 0.0%  |
| mmu-mir-669c-5p | 2   | 10430946 | 10430967 | +      | edit    | 4        | 0        | 0.0%  | 0         | 0.0%  | 0         | 0.0%  |
| mmu-mir-669c-5p | 2   | 10430946 | 10430967 | +      | edit    | 5        | 0        | 0.0%  | 0         | 0.0%  | 0         | 0.0%  |
| mmu-mir-669c-5p | 2   | 10430946 | 10430967 | +      | edit    | 6        | 3        | 0.0%  | 0         | 0.0%  | 0         | 0.0%  |
| mmu-mir-669c-5p | 2   | 10430946 | 10430967 | +      | edit    | 7        | 0        | 0.0%  | 0         | 0.0%  | 0         | 0.0%  |
| mmu-mir-669c-5p | 2   | 10430946 | 10430967 | +      | edit    | 8        | 12       | 0.1%  | 11        | 0.1%  | 6         | 0.1%  |
| mmu-mir-669c-5p | 2   | 10430946 | 10430967 | +      | edit    | 9        | 0        | 0.0%  | 0         | 0.0%  | 0         | 0.0%  |
| mmu-mir-669c-5p | 2   | 10430946 | 10430967 | +      | edit    | 10       | 11       | 0.1%  | 0         | 0.0%  | 0         | 0.0%  |
| mmu-mir-669c-5p | 2   | 10430946 | 10430967 | +      | edit    | 11       | 0        | 0.0%  | 0         | 0.0%  | 0         | 0.0%  |
| mmu-mir-669c-5p | 2   | 10430946 | 10430967 | +      | edit    | 12       | 21       | 0.2%  | 14        | 0.1%  | 10        | 0.1%  |
| mmu-mir-669c-5p | 2   | 10430946 | 10430967 | +      | edit    | 13       | 0        | 0.0%  | 7         | 0.1%  | 0         | 0.0%  |
| mmu-mir-669c-5p | 2   | 10430946 | 10430967 | +      | edit    | 14       | 0        | 0.0%  | 0         | 0.0%  | 0         | 0.0%  |
| mmu-mir-669c-5p | 2   | 10430946 | 10430967 | +      | edit    | 15       | 15       | 0.2%  | 72        | 0.6%  | 12        | 0.1%  |
| mmu-mir-669c-5p | 2   | 10430946 | 10430967 | +      | edit    | 16       | 0        | 0.0%  | 0         | 0.0%  | 0         | 0.0%  |
| mmu-mir-669c-5p | 2   | 10430946 | 10430967 | +      | edit    | 17       | 11       | 0.1%  | 13        | 0.1%  | 0         | 0.0%  |
| mmu-mir-669c-5p | 2   | 10430946 | 10430967 | +      | edit    | 18       | 0        | 0.0%  | 0         | 0.0%  | 0         | 0.0%  |
| mmu-mir-669c-5p | 2   | 10430946 | 10430967 | +      | edit    | 19       | 41       | 0.4%  | 19        | 0.2%  | 12        | 0.2%  |
| mmu-mir-669c-5p | 2   | 10430946 | 10430967 | +      | edit    | 20       | 19       | 0.2%  | 16        | 0.1%  | 28        | 0.3%  |
| mmu-mir-669c-5p | 2   | 10430946 | 10430967 | +      | edit    | 21       | 84       | 0.8%  | 63        | 0.6%  | 31        | 0.4%  |
| mmu-mir-669c-5p | 2   | 10430946 | 10430967 | +      | edit    | 22       | 81       | 0.8%  | 41        | 0.4%  | 93        | 1.1%  |
| EDITED          |     |          |          |        |         |          | 364      | 3.7%  | 264       | 2.4%  | 232       | 2.8%  |
| CANONICAL       |     |          |          |        |         |          | 9480     | 96.3% | 10842     | 97.6% | 7987      | 97.2% |
| TOTAL           |     |          |          |        |         |          | 9844     |       | 11106     |       | 8219      |       |

| miRNA          | Chr | Start     | Stop      | Strand | Type     | Position | P7 reads | P7%   | P10 reads | P10%  | P14 reads | P14%  |
|----------------|-----|-----------|-----------|--------|----------|----------|----------|-------|-----------|-------|-----------|-------|
| mmu-mir-672-5p | X   | 101311567 | 101311589 | -      | 5' Indel | 5'       | 7        | 0.1%  | 0         | 0.0%  | 0         | 0.0%  |
| mmu-mir-672-5p | X   | 101311567 | 101311589 | -      | Indel    | 23       | 21       | 0.3%  | 9         | 0.1%  | 9         | 0.3%  |
| mmu-mir-672-5p | X   | 101311567 | 101311589 | -      | edit     | 1        | 0        | 0.0%  | 0         | 0.0%  | 0         | 0.0%  |
| mmu-mir-672-5p | X   | 101311567 | 101311589 | -      | edit     | 2        | 0        | 0.0%  | 0         | 0.0%  | 0         | 0.0%  |
| mmu-mir-672-5p | X   | 101311567 | 101311589 | -      | edit     | 3        | 0        | 0.0%  | 0         | 0.0%  | 0         | 0.0%  |
| mmu-mir-672-5p | X   | 101311567 | 101311589 | -      | edit     | 4        | 0        | 0.0%  | 0         | 0.0%  | 0         | 0.0%  |
| mmu-mir-672-5p | X   | 101311567 | 101311589 | -      | edit     | 5        | 0        | 0.0%  | 0         | 0.0%  | 0         | 0.0%  |
| mmu-mir-672-5p | X   | 101311567 | 101311589 | -      | edit     | 6        | 0        | 0.0%  | 0         | 0.0%  | 0         | 0.0%  |
| mmu-mir-672-5p | X   | 101311567 | 101311589 | -      | edit     | 7        | 0        | 0.0%  | 0         | 0.0%  | 0         | 0.0%  |
| mmu-mir-672-5p | X   | 101311567 | 101311589 | -      | edit     | 8        | 3        | 0.0%  | 0         | 0.0%  | 0         | 0.0%  |
| mmu-mir-672-5p | X   | 101311567 | 101311589 | -      | edit     | 9        | 0        | 0.0%  | 0         | 0.0%  | 0         | 0.0%  |
| mmu-mir-672-5p | X   | 101311567 | 101311589 | -      | edit     | 10       | 0        | 0.0%  | 0         | 0.0%  | 0         | 0.0%  |
| mmu-mir-672-5p | X   | 101311567 | 101311589 | -      | edit     | 11       | 0        | 0.0%  | 0         | 0.0%  | 0         | 0.0%  |
| mmu-mir-672-5p | X   | 101311567 | 101311589 | -      | edit     | 12       | 0        | 0.0%  | 0         | 0.0%  | 0         | 0.0%  |
| mmu-mir-672-5p | X   | 101311567 | 101311589 | -      | edit     | 13       | 0        | 0.0%  | 0         | 0.0%  | 0         | 0.0%  |
| mmu-mir-672-5p | X   | 101311567 | 101311589 | -      | edit     | 14       | 0        | 0.0%  | 0         | 0.0%  | 0         | 0.0%  |
| mmu-mir-672-5p | X   | 101311567 | 101311589 | -      | edit     | 15       | 4        | 0.0%  | 4         | 0.1%  | 4         | 0.1%  |
| mmu-mir-672-5p | X   | 101311567 | 101311589 | -      | edit     | 16       | 6        | 0.1%  | 8         | 0.1%  | 0         | 0.0%  |
| mmu-mir-672-5p | X   | 101311567 | 101311589 | -      | edit     | 17       | 15       | 0.2%  | 13        | 0.2%  | 12        | 0.3%  |
| mmu-mir-672-5p | X   | 101311567 | 101311589 | -      | edit     | 18       | 6        | 0.1%  | 6         | 0.1%  | 7         | 0.2%  |
| mmu-mir-672-5p | X   | 101311567 | 101311589 | -      | edit     | 19       | 51       | 0.6%  | 28        | 0.4%  | 17        | 0.5%  |
| mmu-mir-672-5p | X   | 101311567 | 101311589 | -      | edit     | 20       | 9        | 0.1%  | 9         | 0.1%  | 4         | 0.1%  |
| mmu-mir-672-5p | X   | 101311567 | 101311589 | -      | edit     | 21       | 5        | 0.1%  | 0         | 0.0%  | 0         | 0.0%  |
| mmu-mir-672-5p | X   | 101311567 | 101311589 | -      | edit     | 22       | 18       | 0.2%  | 4         | 0.1%  | 10        | 0.3%  |
| mmu-mir-672-5p | X   | 101311567 | 101311589 | -      | edit     | 23       | 3        | 0.0%  | 0         | 0.0%  | 0         | 0.0%  |
| EDITED         |     |           |           |        |          |          | 147      | 1.8%  | 80        | 1.2%  | 63        | 1.8%  |
| CANONICAL      |     |           |           |        |          |          | 7961     | 98.2% | 6722      | 98.8% | 3428      | 98.2% |
| TOTAL          |     |           |           |        |          |          | 8108     |       | 6802      |       | 3491      |       |

| miRNA          | Chr | Start     | Stop      | Strand | Type | Position | P7 reads | P7%   | P10 reads | P10%   | P14 reads | P14%   |
|----------------|-----|-----------|-----------|--------|------|----------|----------|-------|-----------|--------|-----------|--------|
| mmu-mir-674-5p | 2   | 117010887 | 117010908 | +      | edit | 1        | 0        | 0.0%  | 0         | 0.0%   | 0         | 0.0%   |
| mmu-mir-674-5p | 2   | 117010887 | 117010908 | +      | edit | 2        | 0        | 0.0%  | 0         | 0.0%   | 0         | 0.0%   |
| mmu-mir-674-5p | 2   | 117010887 | 117010908 | +      | edit | 3        | 0        | 0.0%  | 0         | 0.0%   | 0         | 0.0%   |
| mmu-mir-674-5p | 2   | 117010887 | 117010908 | +      | edit | 4        | 0        | 0.0%  | 0         | 0.0%   | 0         | 0.0%   |
| mmu-mir-674-5p | 2   | 117010887 | 117010908 | +      | edit | 5        | 0        | 0.0%  | 0         | 0.0%   | 0         | 0.0%   |
| mmu-mir-674-5p | 2   | 117010887 | 117010908 | +      | edit | 6        | 0        | 0.0%  | 0         | 0.0%   | 0         | 0.0%   |
| mmu-mir-674-5p | 2   | 117010887 | 117010908 | +      | edit | 7        | 0        | 0.0%  | 0         | 0.0%   | 0         | 0.0%   |
| mmu-mir-674-5p | 2   | 117010887 | 117010908 | +      | edit | 8        | 0        | 0.0%  | 0         | 0.0%   | 0         | 0.0%   |
| mmu-mir-674-5p | 2   | 117010887 | 117010908 | +      | edit | 9        | 0        | 0.0%  | 0         | 0.0%   | 0         | 0.0%   |
| mmu-mir-674-5p | 2   | 117010887 | 117010908 | +      | edit | 10       | 0        | 0.0%  | 0         | 0.0%   | 0         | 0.0%   |
| mmu-mir-674-5p | 2   | 117010887 | 117010908 | +      | edit | 11       | 0        | 0.0%  | 0         | 0.0%   | 0         | 0.0%   |
| mmu-mir-674-5p | 2   | 117010887 | 117010908 | +      | edit | 12       | 0        | 0.0%  | 0         | 0.0%   | 0         | 0.0%   |
| mmu-mir-674-5p | 2   | 117010887 | 117010908 | +      | edit | 13       | 0        | 0.0%  | 0         | 0.0%   | 0         | 0.0%   |
| mmu-mir-674-5p | 2   | 117010887 | 117010908 | +      | edit | 14       | 0        | 0.0%  | 0         | 0.0%   | 0         | 0.0%   |
| mmu-mir-674-5p | 2   | 117010887 | 117010908 | +      | edit | 15       | 0        | 0.0%  | 0         | 0.0%   | 0         | 0.0%   |
| mmu-mir-674-5p | 2   | 117010887 | 117010908 | +      | edit | 16       | 0        | 0.0%  | 0         | 0.0%   | 0         | 0.0%   |
| mmu-mir-674-5p | 2   | 117010887 | 117010908 | +      | edit | 17       | 0        | 0.0%  | 0         | 0.0%   | 0         | 0.0%   |
| mmu-mir-674-5p | 2   | 117010887 | 117010908 | +      | edit | 18       | 0        | 0.0%  | 0         | 0.0%   | 0         | 0.0%   |
| mmu-mir-674-5p | 2   | 117010887 | 117010908 | +      | edit | 19       | 8        | 0.8%  | 0         | 0.0%   | 0         | 0.0%   |
| mmu-mir-674-5p | 2   | 117010887 | 117010908 | +      | edit | 20       | 0        | 0.0%  | 0         | 0.0%   | 0         | 0.0%   |
| mmu-mir-674-5p | 2   | 117010887 | 117010908 | +      | edit | 21       | 0        | 0.0%  | 0         | 0.0%   | 0         | 0.0%   |
| mmu-mir-674-5p | 2   | 117010887 | 117010908 | +      | edit | 22       | 0        | 0.0%  | 0         | 0.0%   | 0         | 0.0%   |
| EDITED         |     |           |           |        |      |          | 8        | 0.8%  | 0         | 0.0%   | 0         | 0.0%   |
| CANONICAL      |     |           |           |        |      |          | 938      | 99.2% | 296       | 100.0% | 193       | 100.0% |
| TOTAL          |     |           |           |        |      |          | 946      |       | 296       |        | 193       |        |

| miRNA          | Chr | Start    | Stop     | Strand | Type     | Position | P7 reads | P7%   | P10 reads | P10%   | P14 reads | P14%  |
|----------------|-----|----------|----------|--------|----------|----------|----------|-------|-----------|--------|-----------|-------|
| mmu-mir-676-3p | X   | 97576490 | 97576510 | +      | 3' Indel | 3'       | 7        | 0.6%  | 0         | 0.0%   | 3         | 0.6%  |
| mmu-mir-676-3p | X   | 97576490 | 97576510 | +      | edit     | 1        | 0        | 0.0%  | 0         | 0.0%   | 0         | 0.0%  |
| mmu-mir-676-3p | X   | 97576490 | 97576510 | +      | edit     | 2        | 0        | 0.0%  | 0         | 0.0%   | 0         | 0.0%  |
| mmu-mir-676-3p | X   | 97576490 | 97576510 | +      | edit     | 3        | 0        | 0.0%  | 0         | 0.0%   | 0         | 0.0%  |
| mmu-mir-676-3p | X   | 97576490 | 97576510 | +      | edit     | 4        | 0        | 0.0%  | 0         | 0.0%   | 0         | 0.0%  |
| mmu-mir-676-3p | X   | 97576490 | 97576510 | +      | edit     | 5        | 0        | 0.0%  | 0         | 0.0%   | 0         | 0.0%  |
| mmu-mir-676-3p | X   | 97576490 | 97576510 | +      | edit     | 6        | 0        | 0.0%  | 0         | 0.0%   | 0         | 0.0%  |
| mmu-mir-676-3p | X   | 97576490 | 97576510 | +      | edit     | 7        | 0        | 0.0%  | 0         | 0.0%   | 0         | 0.0%  |
| mmu-mir-676-3p | X   | 97576490 | 97576510 | +      | edit     | 8        | 0        | 0.0%  | 0         | 0.0%   | 0         | 0.0%  |
| mmu-mir-676-3p | X   | 97576490 | 97576510 | +      | edit     | 9        | 0        | 0.0%  | 0         | 0.0%   | 0         | 0.0%  |
| mmu-mir-676-3p | X   | 97576490 | 97576510 | +      | edit     | 10       | 0        | 0.0%  | 0         | 0.0%   | 0         | 0.0%  |
| mmu-mir-676-3p | X   | 97576490 | 97576510 | +      | edit     | 11       | 0        | 0.0%  | 0         | 0.0%   | 0         | 0.0%  |
| mmu-mir-676-3p | X   | 97576490 | 97576510 | +      | edit     | 12       | 0        | 0.0%  | 0         | 0.0%   | 0         | 0.0%  |
| mmu-mir-676-3p | X   | 97576490 | 97576510 | +      | edit     | 13       | 0        | 0.0%  | 0         | 0.0%   | 0         | 0.0%  |
| mmu-mir-676-3p | X   | 97576490 | 97576510 | +      | edit     | 14       | 0        | 0.0%  | 0         | 0.0%   | 0         | 0.0%  |
| mmu-mir-676-3p | X   | 97576490 | 97576510 | +      | edit     | 15       | 7        | 0.6%  | 0         | 0.0%   | 4         | 0.7%  |
| mmu-mir-676-3p | X   | 97576490 | 97576510 | +      | edit     | 16       | 0        | 0.0%  | 0         | 0.0%   | 0         | 0.0%  |
| mmu-mir-676-3p | X   | 97576490 | 97576510 | +      | edit     | 17       | 0        | 0.0%  | 0         | 0.0%   | 0         | 0.0%  |
| mmu-mir-676-3p | X   | 97576490 | 97576510 | +      | edit     | 18       | 0        | 0.0%  | 0         | 0.0%   | 0         | 0.0%  |
| mmu-mir-676-3p | X   | 97576490 | 97576510 | +      | edit     | 19       | 7        | 0.6%  | 0         | 0.0%   | 0         | 0.0%  |
| mmu-mir-676-3p | X   | 97576490 | 97576510 | +      | edit     | 20       | 0        | 0.0%  | 0         | 0.0%   | 0         | 0.0%  |
| mmu-mir-676-3p | X   | 97576490 | 97576510 | +      | edit     | 21       | 0        | 0.0%  | 0         | 0.0%   | 0         | 0.0%  |
| mmu-mir-676-3p | X   | 97576490 | 97576510 | +      | edit     | 22       | 0        | 0.0%  | 0         | 0.0%   | 0         | 0.0%  |
| EDITED         |     |          |          |        |          |          | 21       | 1.8%  | 0         | 0.0%   | 7         | 1.4%  |
| CANONICAL      |     |          |          |        |          |          | 1160     | 98.2% | 665       | 100.0% | 468       | 98.6% |
| TOTAL          |     |          |          |        |          |          | 1181     |       | 665       |        | 475       |       |

| miRNA          | Chr | Start     | Stop      | Strand | Type | Position | P7 reads | P7%   | P10 reads | P10%   | P14 reads | P14%   |
|----------------|-----|-----------|-----------|--------|------|----------|----------|-------|-----------|--------|-----------|--------|
| mmu-mir-708-5p | 7   | 103397960 | 103397982 | +      | edit | 1        | 0        | 0.0%  | 0         | 0.0%   | 0         | 0.0%   |
| mmu-mir-708-5p | 7   | 103397960 | 103397982 | +      | edit | 2        | 0        | 0.0%  | 0         | 0.0%   | 0         | 0.0%   |
| mmu-mir-708-5p | 7   | 103397960 | 103397982 | +      | edit | 3        | 0        | 0.0%  | 0         | 0.0%   | 0         | 0.0%   |
| mmu-mir-708-5p | 7   | 103397960 | 103397982 | +      | edit | 4        | 0        | 0.0%  | 0         | 0.0%   | 0         | 0.0%   |
| mmu-mir-708-5p | 7   | 103397960 | 103397982 | +      | edit | 5        | 0        | 0.0%  | 0         | 0.0%   | 0         | 0.0%   |
| mmu-mir-708-5p | 7   | 103397960 | 103397982 | +      | edit | 6        | 0        | 0.0%  | 0         | 0.0%   | 0         | 0.0%   |
| mmu-mir-708-5p | 7   | 103397960 | 103397982 | +      | edit | 7        | 0        | 0.0%  | 0         | 0.0%   | 0         | 0.0%   |
| mmu-mir-708-5p | 7   | 103397960 | 103397982 | +      | edit | 8        | 0        | 0.0%  | 0         | 0.0%   | 0         | 0.0%   |
| mmu-mir-708-5p | 7   | 103397960 | 103397982 | +      | edit | 9        | 0        | 0.0%  | 0         | 0.0%   | 0         | 0.0%   |
| mmu-mir-708-5p | 7   | 103397960 | 103397982 | +      | edit | 10       | 0        | 0.0%  | 0         | 0.0%   | 0         | 0.0%   |
| mmu-mir-708-5p | 7   | 103397960 | 103397982 | +      | edit | 11       | 0        | 0.0%  | 0         | 0.0%   | 0         | 0.0%   |
| mmu-mir-708-5p | 7   | 103397960 | 103397982 | +      | edit | 12       | 0        | 0.0%  | 0         | 0.0%   | 0         | 0.0%   |
| mmu-mir-708-5p | 7   | 103397960 | 103397982 | +      | edit | 13       | 0        | 0.0%  | 0         | 0.0%   | 0         | 0.0%   |
| mmu-mir-708-5p | 7   | 103397960 | 103397982 | +      | edit | 14       | 0        | 0.0%  | 0         | 0.0%   | 0         | 0.0%   |
| mmu-mir-708-5p | 7   | 103397960 | 103397982 | +      | edit | 15       | 3        | 0.5%  | 0         | 0.0%   | 0         | 0.0%   |
| mmu-mir-708-5p | 7   | 103397960 | 103397982 | +      | edit | 16       | 0        | 0.0%  | 0         | 0.0%   | 0         | 0.0%   |
| mmu-mir-708-5p | 7   | 103397960 | 103397982 | +      | edit | 17       | 0        | 0.0%  | 0         | 0.0%   | 0         | 0.0%   |
| mmu-mir-708-5p | 7   | 103397960 | 103397982 | +      | edit | 18       | 0        | 0.0%  | 0         | 0.0%   | 0         | 0.0%   |
| mmu-mir-708-5p | 7   | 103397960 | 103397982 | +      | edit | 19       | 8        | 1.3%  | 0         | 0.0%   | 0         | 0.0%   |
| mmu-mir-708-5p | 7   | 103397960 | 103397982 | +      | edit | 20       | 0        | 0.0%  | 0         | 0.0%   | 0         | 0.0%   |
| mmu-mir-708-5p | 7   | 103397960 | 103397982 | +      | edit | 21       | 0        | 0.0%  | 0         | 0.0%   | 0         | 0.0%   |
| mmu-mir-708-5p | 7   | 103397960 | 103397982 | +      | edit | 22       | 0        | 0.0%  | 0         | 0.0%   | 0         | 0.0%   |
| EDITED         |     |           |           |        |      |          | 11       | 1.8%  | 0         | 0.0%   | 0         | 0.0%   |
| CANONICAL      |     |           |           |        |      |          | 590      | 98.2% | 192       | 100.0% | 95        | 100.0% |
| TOTAL          |     |           |           |        |      |          | 601      |       | 192       |        | 95        |        |



| miRNA          | Chr | Start    | Stop     | Strand | Type  | Position | P7 reads | P7%    | P10 reads | P10%   | P14 reads | P14%  |
|----------------|-----|----------|----------|--------|-------|----------|----------|--------|-----------|--------|-----------|-------|
| mmu-mir-742-3p | X   | 64033551 | 64033572 | -      | Indel | 22       | 0        | 0.0%   | 0         | 0.0%   | 8         | 6.8%  |
| mmu-mir-742-3p | X   | 64033551 | 64033572 | -      | edit  | 1        | 0        | 0.0%   | 0         | 0.0%   | 0         | 0.0%  |
| mmu-mir-742-3p | X   | 64033551 | 64033572 | -      | edit  | 2        | 0        | 0.0%   | 0         | 0.0%   | 0         | 0.0%  |
| mmu-mir-742-3p | X   | 64033551 | 64033572 | -      | edit  | 3        | 0        | 0.0%   | 0         | 0.0%   | 0         | 0.0%  |
| mmu-mir-742-3p | X   | 64033551 | 64033572 | -      | edit  | 4        | 0        | 0.0%   | 0         | 0.0%   | 0         | 0.0%  |
| mmu-mir-742-3p | X   | 64033551 | 64033572 | -      | edit  | 5        | 0        | 0.0%   | 0         | 0.0%   | 0         | 0.0%  |
| mmu-mir-742-3p | X   | 64033551 | 64033572 | -      | edit  | 6        | 0        | 0.0%   | 0         | 0.0%   | 0         | 0.0%  |
| mmu-mir-742-3p | X   | 64033551 | 64033572 | -      | edit  | 7        | 0        | 0.0%   | 0         | 0.0%   | 0         | 0.0%  |
| mmu-mir-742-3p | X   | 64033551 | 64033572 | -      | edit  | 8        | 0        | 0.0%   | 0         | 0.0%   | 0         | 0.0%  |
| mmu-mir-742-3p | X   | 64033551 | 64033572 | -      | edit  | 9        | 0        | 0.0%   | 0         | 0.0%   | 0         | 0.0%  |
| mmu-mir-742-3p | X   | 64033551 | 64033572 | -      | edit  | 10       | 0        | 0.0%   | 0         | 0.0%   | 0         | 0.0%  |
| mmu-mir-742-3p | X   | 64033551 | 64033572 | -      | edit  | 11       | 0        | 0.0%   | 0         | 0.0%   | 0         | 0.0%  |
| mmu-mir-742-3p | X   | 64033551 | 64033572 | -      | edit  | 12       | 0        | 0.0%   | 0         | 0.0%   | 0         | 0.0%  |
| mmu-mir-742-3p | X   | 64033551 | 64033572 | -      | edit  | 13       | 0        | 0.0%   | 0         | 0.0%   | 0         | 0.0%  |
| mmu-mir-742-3p | X   | 64033551 | 64033572 | -      | edit  | 14       | 0        | 0.0%   | 0         | 0.0%   | 0         | 0.0%  |
| mmu-mir-742-3p | X   | 64033551 | 64033572 | -      | edit  | 15       | 0        | 0.0%   | 0         | 0.0%   | 0         | 0.0%  |
| mmu-mir-742-3p | X   | 64033551 | 64033572 | -      | edit  | 16       | 0        | 0.0%   | 0         | 0.0%   | 0         | 0.0%  |
| mmu-mir-742-3p | X   | 64033551 | 64033572 | -      | edit  | 17       | 0        | 0.0%   | 0         | 0.0%   | 0         | 0.0%  |
| mmu-mir-742-3p | X   | 64033551 | 64033572 | -      | edit  | 18       | 0        | 0.0%   | 0         | 0.0%   | 0         | 0.0%  |
| mmu-mir-742-3p | X   | 64033551 | 64033572 | -      | edit  | 19       | 0        | 0.0%   | 0         | 0.0%   | 0         | 0.0%  |
| mmu-mir-742-3p | X   | 64033551 | 64033572 | -      | edit  | 20       | 0        | 0.0%   | 0         | 0.0%   | 0         | 0.0%  |
| mmu-mir-742-3p | X   | 64033551 | 64033572 | -      | edit  | 21       | 0        | 0.0%   | 0         | 0.0%   | 0         | 0.0%  |
| mmu-mir-742-3p | X   | 64033551 | 64033572 | -      | edit  | 22       | 0        | 0.0%   | 0         | 0.0%   | 0         | 0.0%  |
| EDITED         |     |          |          |        |       |          | 0        | 0.0%   | 0         | 0.0%   | 8         | 6.8%  |
| CANONICAL      |     |          |          |        |       |          | 25       | 100.0% | 74        | 100.0% | 109       | 93.2% |
| TOTAL          |     |          |          |        |       |          | 25       |        | 74        |        | 117       |       |

| miRNA           | Chr | Start    | Stop     | Strand | Type    | Position | P7 reads | P7%    | P10 reads | P10%  | P14 reads | P14%  |
|-----------------|-----|----------|----------|--------|---------|----------|----------|--------|-----------|-------|-----------|-------|
| mmu-mir-743a-5p | X   | 64029935 | 64029956 | -      | 5' Edit | 5'       | 0        | 0.0%   | 0         | 0.0%  | 5         | 0.8%  |
| mmu-mir-743a-5p | X   | 64029935 | 64029956 | -      | edit    | 1        | 0        | 0.0%   | 0         | 0.0%  | 0         | 0.0%  |
| mmu-mir-743a-5p | X   | 64029935 | 64029956 | -      | edit    | 2        | 0        | 0.0%   | 0         | 0.0%  | 0         | 0.0%  |
| mmu-mir-743a-5p | X   | 64029935 | 64029956 | -      | edit    | 3        | 0        | 0.0%   | 0         | 0.0%  | 0         | 0.0%  |
| mmu-mir-743a-5p | X   | 64029935 | 64029956 | -      | edit    | 4        | 0        | 0.0%   | 0         | 0.0%  | 0         | 0.0%  |
| mmu-mir-743a-5p | X   | 64029935 | 64029956 | -      | edit    | 5        | 0        | 0.0%   | 0         | 0.0%  | 0         | 0.0%  |
| mmu-mir-743a-5p | X   | 64029935 | 64029956 | -      | edit    | 6        | 0        | 0.0%   | 0         | 0.0%  | 0         | 0.0%  |
| mmu-mir-743a-5p | X   | 64029935 | 64029956 | -      | edit    | 7        | 0        | 0.0%   | 0         | 0.0%  | 0         | 0.0%  |
| mmu-mir-743a-5p | X   | 64029935 | 64029956 | -      | edit    | 8        | 0        | 0.0%   | 0         | 0.0%  | 0         | 0.0%  |
| mmu-mir-743a-5p | X   | 64029935 | 64029956 | -      | edit    | 9        | 0        | 0.0%   | 0         | 0.0%  | 0         | 0.0%  |
| mmu-mir-743a-5p | X   | 64029935 | 64029956 | -      | edit    | 10       | 0        | 0.0%   | 0         | 0.0%  | 0         | 0.0%  |
| mmu-mir-743a-5p | X   | 64029935 | 64029956 | -      | edit    | 11       | 0        | 0.0%   | 0         | 0.0%  | 0         | 0.0%  |
| mmu-mir-743a-5p | X   | 64029935 | 64029956 | -      | edit    | 12       | 0        | 0.0%   | 0         | 0.0%  | 0         | 0.0%  |
| mmu-mir-743a-5p | X   | 64029935 | 64029956 | -      | edit    | 13       | 0        | 0.0%   | 0         | 0.0%  | 0         | 0.0%  |
| mmu-mir-743a-5p | X   | 64029935 | 64029956 | -      | edit    | 14       | 0        | 0.0%   | 0         | 0.0%  | 0         | 0.0%  |
| mmu-mir-743a-5p | X   | 64029935 | 64029956 | -      | edit    | 15       | 0        | 0.0%   | 0         | 0.0%  | 0         | 0.0%  |
| mmu-mir-743a-5p | X   | 64029935 | 64029956 | -      | edit    | 16       | 0        | 0.0%   | 0         | 0.0%  | 0         | 0.0%  |
| mmu-mir-743a-5p | X   | 64029935 | 64029956 | -      | edit    | 17       | 0        | 0.0%   | 9         | 2.1%  | 0         | 0.0%  |
| mmu-mir-743a-5p | X   | 64029935 | 64029956 | -      | edit    | 18       | 0        | 0.0%   | 0         | 0.0%  | 0         | 0.0%  |
| mmu-mir-743a-5p | X   | 64029935 | 64029956 | -      | edit    | 19       | 0        | 0.0%   | 0         | 0.0%  | 11        | 1.7%  |
| mmu-mir-743a-5p | X   | 64029935 | 64029956 | -      | edit    | 20       | 0        | 0.0%   | 0         | 0.0%  | 0         | 0.0%  |
| mmu-mir-743a-5p | X   | 64029935 | 64029956 | -      | edit    | 21       | 0        | 0.0%   | 0         | 0.0%  | 0         | 0.0%  |
| mmu-mir-743a-5p | X   | 64029935 | 64029956 | -      | edit    | 22       | 0        | 0.0%   | 0         | 0.0%  | 0         | 0.0%  |
| EDITED          |     |          |          |        |         |          | 0        | 0.0%   | 9         | 2.1%  | 16        | 2.5%  |
| CANONICAL       |     |          |          |        |         |          | 173      | 100.0% | 399       | 97.9% | 634       | 97.5% |
| TOTAL           |     |          |          |        |         |          | 173      |        | 408       |       | 650       |       |

| miRNA           | Chr | Start    | Stop     | Strand | Type  | Position | P7 reads | P7%   | P10 reads | P10%  | P14 reads | P14%  |
|-----------------|-----|----------|----------|--------|-------|----------|----------|-------|-----------|-------|-----------|-------|
| mmu-mir-743b-3p | X   | 64030441 | 64030462 | -      | Indel | 22       | 0        | 0.0%  | 0         | 0.0%  | 32        | 0.5%  |
| mmu-mir-743b-3p | X   | 64030441 | 64030462 | -      | edit  | 1        | 0        | 0.0%  | 0         | 0.0%  | 0         | 0.0%  |
| mmu-mir-743b-3p | X   | 64030441 | 64030462 | -      | edit  | 2        | 0        | 0.0%  | 0         | 0.0%  | 0         | 0.0%  |
| mmu-mir-743b-3p | X   | 64030441 | 64030462 | -      | edit  | 3        | 0        | 0.0%  | 0         | 0.0%  | 0         | 0.0%  |
| mmu-mir-743b-3p | X   | 64030441 | 64030462 | -      | edit  | 4        | 0        | 0.0%  | 0         | 0.0%  | 0         | 0.0%  |
| mmu-mir-743b-3p | X   | 64030441 | 64030462 | -      | edit  | 5        | 0        | 0.0%  | 0         | 0.0%  | 0         | 0.0%  |
| mmu-mir-743b-3p | X   | 64030441 | 64030462 | -      | edit  | 6        | 0        | 0.0%  | 0         | 0.0%  | 0         | 0.0%  |
| mmu-mir-743b-3p | X   | 64030441 | 64030462 | -      | edit  | 7        | 0        | 0.0%  | 0         | 0.0%  | 0         | 0.0%  |
| mmu-mir-743b-3p | X   | 64030441 | 64030462 | -      | edit  | 8        | 0        | 0.0%  | 3         | 0.1%  | 6         | 0.1%  |
| mmu-mir-743b-3p | X   | 64030441 | 64030462 | -      | edit  | 9        | 0        | 0.0%  | 0         | 0.0%  | 0         | 0.0%  |
| mmu-mir-743b-3p | X   | 64030441 | 64030462 | -      | edit  | 10       | 0        | 0.0%  | 0         | 0.0%  | 0         | 0.0%  |
| mmu-mir-743b-3p | X   | 64030441 | 64030462 | -      | edit  | 11       | 0        | 0.0%  | 0         | 0.0%  | 0         | 0.0%  |
| mmu-mir-743b-3p | X   | 64030441 | 64030462 | -      | edit  | 12       | 0        | 0.0%  | 0         | 0.0%  | 0         | 0.0%  |
| mmu-mir-743b-3p | X   | 64030441 | 64030462 | -      | edit  | 13       | 0        | 0.0%  | 0         | 0.0%  | 0         | 0.0%  |
| mmu-mir-743b-3p | X   | 64030441 | 64030462 | -      | edit  | 14       | 0        | 0.0%  | 0         | 0.0%  | 0         | 0.0%  |
| mmu-mir-743b-3p | X   | 64030441 | 64030462 | -      | edit  | 15       | 3        | 0.3%  | 6         | 0.2%  | 11        | 0.2%  |
| mmu-mir-743b-3p | X   | 64030441 | 64030462 | -      | edit  | 16       | 0        | 0.0%  | 0         | 0.0%  | 0         | 0.0%  |
| mmu-mir-743b-3p | X   | 64030441 | 64030462 | -      | edit  | 17       | 4        | 0.4%  | 56        | 1.7%  | 16        | 0.2%  |
| mmu-mir-743b-3p | X   | 64030441 | 64030462 | -      | edit  | 18       | 0        | 0.0%  | 0         | 0.0%  | 0         | 0.0%  |
| mmu-mir-743b-3p | X   | 64030441 | 64030462 | -      | edit  | 19       | 3        | 0.3%  | 3         | 0.1%  | 23        | 0.3%  |
| mmu-mir-743b-3p | X   | 64030441 | 64030462 | -      | edit  | 20       | 0        | 0.0%  | 0         | 0.0%  | 0         | 0.0%  |
| mmu-mir-743b-3p | X   | 64030441 | 64030462 | -      | edit  | 21       | 0        | 0.0%  | 0         | 0.0%  | 0         | 0.0%  |
| mmu-mir-743b-3p | X   | 64030441 | 64030462 | -      | edit  | 22       | 0        | 0.0%  | 0         | 0.0%  | 0         | 0.0%  |
| EDITED          |     |          |          |        |       |          | 10       | 0.9%  | 68        | 2.0%  | 88        | 1.3%  |
| CANONICAL       |     |          |          |        |       |          | 1046     | 99.1% | 3238      | 98.0% | 6815      | 98.7% |
| TOTAL           |     |          |          |        |       |          | 1056     |       | 3306      |       | 6903      |       |

| miRNA           | Chr | Start    | Stop     | Strand | Type | Position | P7 reads | P7%    | P10 reads | P10%   | P14 reads | P14%  |
|-----------------|-----|----------|----------|--------|------|----------|----------|--------|-----------|--------|-----------|-------|
| mmu-mir-743b-5p | X   | 64030477 | 64030497 | -      | edit | 1        | 0        | 0.0%   | 0         | 0.0%   | 0         | 0.0%  |
| mmu-mir-743b-5p | X   | 64030477 | 64030497 | -      | edit | 2        | 0        | 0.0%   | 0         | 0.0%   | 0         | 0.0%  |
| mmu-mir-743b-5p | X   | 64030477 | 64030497 | -      | edit | 3        | 0        | 0.0%   | 0         | 0.0%   | 0         | 0.0%  |
| mmu-mir-743b-5p | X   | 64030477 | 64030497 | -      | edit | 4        | 0        | 0.0%   | 0         | 0.0%   | 0         | 0.0%  |
| mmu-mir-743b-5p | X   | 64030477 | 64030497 | -      | edit | 5        | 0        | 0.0%   | 0         | 0.0%   | 0         | 0.0%  |
| mmu-mir-743b-5p | X   | 64030477 | 64030497 | -      | edit | 6        | 0        | 0.0%   | 0         | 0.0%   | 0         | 0.0%  |
| mmu-mir-743b-5p | X   | 64030477 | 64030497 | -      | edit | 7        | 0        | 0.0%   | 0         | 0.0%   | 0         | 0.0%  |
| mmu-mir-743b-5p | X   | 64030477 | 64030497 | -      | edit | 8        | 0        | 0.0%   | 0         | 0.0%   | 0         | 0.0%  |
| mmu-mir-743b-5p | X   | 64030477 | 64030497 | -      | edit | 9        | 0        | 0.0%   | 0         | 0.0%   | 0         | 0.0%  |
| mmu-mir-743b-5p | X   | 64030477 | 64030497 | -      | edit | 10       | 0        | 0.0%   | 0         | 0.0%   | 0         | 0.0%  |
| mmu-mir-743b-5p | X   | 64030477 | 64030497 | -      | edit | 11       | 0        | 0.0%   | 0         | 0.0%   | 0         | 0.0%  |
| mmu-mir-743b-5p | X   | 64030477 | 64030497 | -      | edit | 12       | 0        | 0.0%   | 0         | 0.0%   | 0         | 0.0%  |
| mmu-mir-743b-5p | X   | 64030477 | 64030497 | -      | edit | 13       | 0        | 0.0%   | 0         | 0.0%   | 0         | 0.0%  |
| mmu-mir-743b-5p | X   | 64030477 | 64030497 | -      | edit | 14       | 0        | 0.0%   | 0         | 0.0%   | 0         | 0.0%  |
| mmu-mir-743b-5p | X   | 64030477 | 64030497 | -      | edit | 15       | 0        | 0.0%   | 0         | 0.0%   | 0         | 0.0%  |
| mmu-mir-743b-5p | X   | 64030477 | 64030497 | -      | edit | 16       | 0        | 0.0%   | 0         | 0.0%   | 0         | 0.0%  |
| mmu-mir-743b-5p | X   | 64030477 | 64030497 | -      | edit | 17       | 0        | 0.0%   | 0         | 0.0%   | 4         | 1.0%  |
| mmu-mir-743b-5p | X   | 64030477 | 64030497 | -      | edit | 18       | 0        | 0.0%   | 0         | 0.0%   | 0         | 0.0%  |
| mmu-mir-743b-5p | X   | 64030477 | 64030497 | -      | edit | 19       | 0        | 0.0%   | 0         | 0.0%   | 0         | 0.0%  |
| mmu-mir-743b-5p | X   | 64030477 | 64030497 | -      | edit | 20       | 0        | 0.0%   | 0         | 0.0%   | 0         | 0.0%  |
| mmu-mir-743b-5p | X   | 64030477 | 64030497 | -      | edit | 21       | 0        | 0.0%   | 0         | 0.0%   | 0         | 0.0%  |
| mmu-mir-743b-5p | X   | 64030477 | 64030497 | -      | edit | 22       | 0        | 0.0%   | 0         | 0.0%   | 0         | 0.0%  |
| EDITED          |     |          |          |        |      |          | 0        | 0.0%   | 0         | 0.0%   | 4         | 1.0%  |
| CANONICAL       |     |          |          |        |      |          | 62       | 100.0% | 287       | 100.0% | 351       | 99.0% |
| TOTAL           |     |          |          |        |      |          | 62       |        | 287       |        | 355       |       |

| miRNA          | Chr | Start    | Stop     | Strand | Type    | Position | P7 reads | P7%   | P10 reads | P10%  | P14 reads | P14%  |
|----------------|-----|----------|----------|--------|---------|----------|----------|-------|-----------|-------|-----------|-------|
| mmu-mir-744-5p | 11  | 65548301 | 65548322 | -      | 5' Edit | 5'       | 3        | 0.0%  | 0         | 0.0%  | 0         | 0.0%  |
| mmu-mir-744-5p | 11  | 65548301 | 65548322 | -      | edit    | 1        | 0        | 0.0%  | 0         | 0.0%  | 0         | 0.0%  |
| mmu-mir-744-5p | 11  | 65548301 | 65548322 | -      | edit    | 2        | 0        | 0.0%  | 0         | 0.0%  | 0         | 0.0%  |
| mmu-mir-744-5p | 11  | 65548301 | 65548322 | -      | edit    | 3        | 0        | 0.0%  | 0         | 0.0%  | 0         | 0.0%  |
| mmu-mir-744-5p | 11  | 65548301 | 65548322 | -      | edit    | 4        | 0        | 0.0%  | 7         | 0.1%  | 0         | 0.0%  |
| mmu-mir-744-5p | 11  | 65548301 | 65548322 | -      | edit    | 5        | 0        | 0.0%  | 0         | 0.0%  | 0         | 0.0%  |
| mmu-mir-744-5p | 11  | 65548301 | 65548322 | -      | edit    | 6        | 0        | 0.0%  | 0         | 0.0%  | 0         | 0.0%  |
| mmu-mir-744-5p | 11  | 65548301 | 65548322 | -      | edit    | 7        | 0        | 0.0%  | 0         | 0.0%  | 0         | 0.0%  |
| mmu-mir-744-5p | 11  | 65548301 | 65548322 | -      | edit    | 8        | 8        | 0.1%  | 12        | 0.2%  | 0         | 0.0%  |
| mmu-mir-744-5p | 11  | 65548301 | 65548322 | -      | edit    | 9        | 0        | 0.0%  | 0         | 0.0%  | 0         | 0.0%  |
| mmu-mir-744-5p | 11  | 65548301 | 65548322 | -      | edit    | 10       | 0        | 0.0%  | 0         | 0.0%  | 0         | 0.0%  |
| mmu-mir-744-5p | 11  | 65548301 | 65548322 | -      | edit    | 11       | 0        | 0.0%  | 0         | 0.0%  | 0         | 0.0%  |
| mmu-mir-744-5p | 11  | 65548301 | 65548322 | -      | edit    | 12       | 0        | 0.0%  | 0         | 0.0%  | 0         | 0.0%  |
| mmu-mir-744-5p | 11  | 65548301 | 65548322 | -      | edit    | 13       | 0        | 0.0%  | 0         | 0.0%  | 0         | 0.0%  |
| mmu-mir-744-5p | 11  | 65548301 | 65548322 | -      | edit    | 14       | 0        | 0.0%  | 0         | 0.0%  | 0         | 0.0%  |
| mmu-mir-744-5p | 11  | 65548301 | 65548322 | -      | edit    | 15       | 29       | 0.4%  | 17        | 0.3%  | 8         | 0.3%  |
| mmu-mir-744-5p | 11  | 65548301 | 65548322 | -      | edit    | 16       | 10       | 0.1%  | 42        | 0.6%  | 5         | 0.2%  |
| mmu-mir-744-5p | 11  | 65548301 | 65548322 | -      | edit    | 17       | 18       | 0.3%  | 139       | 2.1%  | 11        | 0.4%  |
| mmu-mir-744-5p | 11  | 65548301 | 65548322 | -      | edit    | 18       | 0        | 0.0%  | 0         | 0.0%  | 0         | 0.0%  |
| mmu-mir-744-5p | 11  | 65548301 | 65548322 | -      | edit    | 19       | 20       | 0.3%  | 97        | 1.5%  | 14        | 0.5%  |
| mmu-mir-744-5p | 11  | 65548301 | 65548322 | -      | edit    | 20       | 0        | 0.0%  | 0         | 0.0%  | 0         | 0.0%  |
| mmu-mir-744-5p | 11  | 65548301 | 65548322 | -      | edit    | 21       | 11       | 0.2%  | 4         | 0.1%  | 0         | 0.0%  |
| mmu-mir-744-5p | 11  | 65548301 | 65548322 | -      | edit    | 22       | 0        | 0.0%  | 0         | 0.0%  | 0         | 0.0%  |
| EDITED         |     |          |          |        |         |          | 99       | 1.4%  | 317       | 4.8%  | 38        | 1.5%  |
| CANONICAL      |     |          |          |        |         |          | 7147     | 98.6% | 6279      | 95.2% | 2511      | 98.5% |
| TOTAL          |     |          |          |        |         |          | 7246     |       | 6596      |       | 2549      |       |

| miRNA          | Chr | Start    | Stop     | Strand | Type | Position | P7 reads | P7%    | P10 reads | P10%  | P14 reads | P14%   |
|----------------|-----|----------|----------|--------|------|----------|----------|--------|-----------|-------|-----------|--------|
| mmu-mir-871-5p | X   | 64063647 | 64063669 | -      | edit | 1        | 0        | 0.0%   | 0         | 0.0%  | 0         | 0.0%   |
| mmu-mir-871-5p | X   | 64063647 | 64063669 | -      | edit | 2        | 0        | 0.0%   | 0         | 0.0%  | 0         | 0.0%   |
| mmu-mir-871-5p | X   | 64063647 | 64063669 | -      | edit | 3        | 0        | 0.0%   | 0         | 0.0%  | 0         | 0.0%   |
| mmu-mir-871-5p | X   | 64063647 | 64063669 | -      | edit | 4        | 0        | 0.0%   | 0         | 0.0%  | 0         | 0.0%   |
| mmu-mir-871-5p | X   | 64063647 | 64063669 | -      | edit | 5        | 0        | 0.0%   | 0         | 0.0%  | 0         | 0.0%   |
| mmu-mir-871-5p | X   | 64063647 | 64063669 | -      | edit | 6        | 0        | 0.0%   | 0         | 0.0%  | 0         | 0.0%   |
| mmu-mir-871-5p | X   | 64063647 | 64063669 | -      | edit | 7        | 0        | 0.0%   | 0         | 0.0%  | 0         | 0.0%   |
| mmu-mir-871-5p | X   | 64063647 | 64063669 | -      | edit | 8        | 0        | 0.0%   | 0         | 0.0%  | 0         | 0.0%   |
| mmu-mir-871-5p | X   | 64063647 | 64063669 | -      | edit | 9        | 0        | 0.0%   | 0         | 0.0%  | 0         | 0.0%   |
| mmu-mir-871-5p | X   | 64063647 | 64063669 | -      | edit | 10       | 0        | 0.0%   | 0         | 0.0%  | 0         | 0.0%   |
| mmu-mir-871-5p | X   | 64063647 | 64063669 | -      | edit | 11       | 0        | 0.0%   | 0         | 0.0%  | 0         | 0.0%   |
| mmu-mir-871-5p | X   | 64063647 | 64063669 | -      | edit | 12       | 0        | 0.0%   | 0         | 0.0%  | 0         | 0.0%   |
| mmu-mir-871-5p | X   | 64063647 | 64063669 | -      | edit | 13       | 0        | 0.0%   | 0         | 0.0%  | 0         | 0.0%   |
| mmu-mir-871-5p | X   | 64063647 | 64063669 | -      | edit | 14       | 0        | 0.0%   | 0         | 0.0%  | 0         | 0.0%   |
| mmu-mir-871-5p | X   | 64063647 | 64063669 | -      | edit | 15       | 0        | 0.0%   | 0         | 0.0%  | 0         | 0.0%   |
| mmu-mir-871-5p | X   | 64063647 | 64063669 | -      | edit | 16       | 0        | 0.0%   | 0         | 0.0%  | 0         | 0.0%   |
| mmu-mir-871-5p | X   | 64063647 | 64063669 | -      | edit | 17       | 0        | 0.0%   | 3         | 2.1%  | 0         | 0.0%   |
| mmu-mir-871-5p | X   | 64063647 | 64063669 | -      | edit | 18       | 0        | 0.0%   | 0         | 0.0%  | 0         | 0.0%   |
| mmu-mir-871-5p | X   | 64063647 | 64063669 | -      | edit | 19       | 0        | 0.0%   | 0         | 0.0%  | 0         | 0.0%   |
| mmu-mir-871-5p | X   | 64063647 | 64063669 | -      | edit | 20       | 0        | 0.0%   | 0         | 0.0%  | 0         | 0.0%   |
| mmu-mir-871-5p | X   | 64063647 | 64063669 | -      | edit | 21       | 0        | 0.0%   | 0         | 0.0%  | 0         | 0.0%   |
| mmu-mir-871-5p | X   | 64063647 | 64063669 | -      | edit | 22       | 0        | 0.0%   | 0         | 0.0%  | 0         | 0.0%   |
| EDITED         |     |          |          |        |      |          | 0        | 0.0%   | 3         | 2.1%  | 0         | 0.0%   |
| CANONICAL      |     |          |          |        |      |          | 58       | 100.0% | 138       | 97.9% | 130       | 100.0% |
| TOTAL          |     |          |          |        |      |          | 58       |        | 141       |       | 130       |        |

| miRNA          | Chr | Start    | Stop     | Strand | Type | Position | P7 reads | P7%   | P10 reads | P10%  | P14 reads | P14%  |
|----------------|-----|----------|----------|--------|------|----------|----------|-------|-----------|-------|-----------|-------|
| mmu-mir-872-5p | 4   | 94331858 | 94331878 | +      | edit | 1        | 0        | 0.0%  | 0         | 0.0%  | 0         | 0.0%  |
| mmu-mir-872-5p | 4   | 94331858 | 94331878 | +      | edit | 2        | 0        | 0.0%  | 0         | 0.0%  | 0         | 0.0%  |
| mmu-mir-872-5p | 4   | 94331858 | 94331878 | +      | edit | 3        | 0        | 0.0%  | 0         | 0.0%  | 0         | 0.0%  |
| mmu-mir-872-5p | 4   | 94331858 | 94331878 | +      | edit | 4        | 0        | 0.0%  | 0         | 0.0%  | 0         | 0.0%  |
| mmu-mir-872-5p | 4   | 94331858 | 94331878 | +      | edit | 5        | 0        | 0.0%  | 0         | 0.0%  | 0         | 0.0%  |
| mmu-mir-872-5p | 4   | 94331858 | 94331878 | +      | edit | 6        | 0        | 0.0%  | 0         | 0.0%  | 0         | 0.0%  |
| mmu-mir-872-5p | 4   | 94331858 | 94331878 | +      | edit | 7        | 0        | 0.0%  | 0         | 0.0%  | 0         | 0.0%  |
| mmu-mir-872-5p | 4   | 94331858 | 94331878 | +      | edit | 8        | 0        | 0.0%  | 0         | 0.0%  | 0         | 0.0%  |
| mmu-mir-872-5p | 4   | 94331858 | 94331878 | +      | edit | 9        | 0        | 0.0%  | 0         | 0.0%  | 0         | 0.0%  |
| mmu-mir-872-5p | 4   | 94331858 | 94331878 | +      | edit | 10       | 0        | 0.0%  | 0         | 0.0%  | 0         | 0.0%  |
| mmu-mir-872-5p | 4   | 94331858 | 94331878 | +      | edit | 11       | 0        | 0.0%  | 0         | 0.0%  | 0         | 0.0%  |
| mmu-mir-872-5p | 4   | 94331858 | 94331878 | +      | edit | 12       | 0        | 0.0%  | 0         | 0.0%  | 0         | 0.0%  |
| mmu-mir-872-5p | 4   | 94331858 | 94331878 | +      | edit | 13       | 0        | 0.0%  | 0         | 0.0%  | 0         | 0.0%  |
| mmu-mir-872-5p | 4   | 94331858 | 94331878 | +      | edit | 14       | 0        | 0.0%  | 0         | 0.0%  | 0         | 0.0%  |
| mmu-mir-872-5p | 4   | 94331858 | 94331878 | +      | edit | 15       | 3        | 0.2%  | 0         | 0.0%  | 0         | 0.0%  |
| mmu-mir-872-5p | 4   | 94331858 | 94331878 | +      | edit | 16       | 0        | 0.0%  | 0         | 0.0%  | 0         | 0.0%  |
| mmu-mir-872-5p | 4   | 94331858 | 94331878 | +      | edit | 17       | 0        | 0.0%  | 0         | 0.0%  | 0         | 0.0%  |
| mmu-mir-872-5p | 4   | 94331858 | 94331878 | +      | edit | 18       | 0        | 0.0%  | 0         | 0.0%  | 0         | 0.0%  |
| mmu-mir-872-5p | 4   | 94331858 | 94331878 | +      | edit | 19       | 0        | 0.0%  | 3         | 0.3%  | 3         | 0.3%  |
| mmu-mir-872-5p | 4   | 94331858 | 94331878 | +      | edit | 20       | 0        | 0.0%  | 0         | 0.0%  | 0         | 0.0%  |
| mmu-mir-872-5p | 4   | 94331858 | 94331878 | +      | edit | 21       | 0        | 0.0%  | 0         | 0.0%  | 0         | 0.0%  |
| mmu-mir-872-5p | 4   | 94331858 | 94331878 | +      | edit | 22       | 0        | 0.0%  | 0         | 0.0%  | 0         | 0.0%  |
| EDITED         |     |          |          |        |      |          | 3        | 0.2%  | 3         | 0.3%  | 3         | 0.3%  |
| CANONICAL      |     |          |          |        |      |          | 1613     | 99.8% | 963       | 99.7% | 870       | 99.7% |
| TOTAL          |     |          |          |        |      |          | 1616     |       | 966       |       | 873       |       |

| miRNA          | Chr | Start    | Stop     | Strand | Type | Position | P7 reads | P7%   | P10 reads | P10%  | P14 reads | P14%   |
|----------------|-----|----------|----------|--------|------|----------|----------|-------|-----------|-------|-----------|--------|
| mmu-mir-877-5p | 17  | 36097740 | 36097759 | -      | edit | 1        | 0        | 0.0%  | 0         | 0.0%  | 0         | 0.0%   |
| mmu-mir-877-5p | 17  | 36097740 | 36097759 | -      | edit | 2        | 0        | 0.0%  | 0         | 0.0%  | 0         | 0.0%   |
| mmu-mir-877-5p | 17  | 36097740 | 36097759 | -      | edit | 3        | 0        | 0.0%  | 0         | 0.0%  | 0         | 0.0%   |
| mmu-mir-877-5p | 17  | 36097740 | 36097759 | -      | edit | 4        | 0        | 0.0%  | 0         | 0.0%  | 0         | 0.0%   |
| mmu-mir-877-5p | 17  | 36097740 | 36097759 | -      | edit | 5        | 0        | 0.0%  | 0         | 0.0%  | 0         | 0.0%   |
| mmu-mir-877-5p | 17  | 36097740 | 36097759 | -      | edit | 6        | 0        | 0.0%  | 0         | 0.0%  | 0         | 0.0%   |
| mmu-mir-877-5p | 17  | 36097740 | 36097759 | -      | edit | 7        | 0        | 0.0%  | 0         | 0.0%  | 0         | 0.0%   |
| mmu-mir-877-5p | 17  | 36097740 | 36097759 | -      | edit | 8        | 0        | 0.0%  | 0         | 0.0%  | 0         | 0.0%   |
| mmu-mir-877-5p | 17  | 36097740 | 36097759 | -      | edit | 9        | 0        | 0.0%  | 0         | 0.0%  | 0         | 0.0%   |
| mmu-mir-877-5p | 17  | 36097740 | 36097759 | -      | edit | 10       | 0        | 0.0%  | 0         | 0.0%  | 0         | 0.0%   |
| mmu-mir-877-5p | 17  | 36097740 | 36097759 | -      | edit | 11       | 0        | 0.0%  | 0         | 0.0%  | 0         | 0.0%   |
| mmu-mir-877-5p | 17  | 36097740 | 36097759 | -      | edit | 12       | 0        | 0.0%  | 0         | 0.0%  | 0         | 0.0%   |
| mmu-mir-877-5p | 17  | 36097740 | 36097759 | -      | edit | 13       | 0        | 0.0%  | 0         | 0.0%  | 0         | 0.0%   |
| mmu-mir-877-5p | 17  | 36097740 | 36097759 | -      | edit | 14       | 0        | 0.0%  | 0         | 0.0%  | 0         | 0.0%   |
| mmu-mir-877-5p | 17  | 36097740 | 36097759 | -      | edit | 15       | 0        | 0.0%  | 0         | 0.0%  | 0         | 0.0%   |
| mmu-mir-877-5p | 17  | 36097740 | 36097759 | -      | edit | 16       | 0        | 0.0%  | 0         | 0.0%  | 0         | 0.0%   |
| mmu-mir-877-5p | 17  | 36097740 | 36097759 | -      | edit | 17       | 4        | 0.7%  | 7         | 2.0%  | 0         | 0.0%   |
| mmu-mir-877-5p | 17  | 36097740 | 36097759 | -      | edit | 18       | 0        | 0.0%  | 0         | 0.0%  | 0         | 0.0%   |
| mmu-mir-877-5p | 17  | 36097740 | 36097759 | -      | edit | 19       | 0        | 0.0%  | 0         | 0.0%  | 0         | 0.0%   |
| mmu-mir-877-5p | 17  | 36097740 | 36097759 | -      | edit | 20       | 0        | 0.0%  | 0         | 0.0%  | 0         | 0.0%   |
| mmu-mir-877-5p | 17  | 36097740 | 36097759 | -      | edit | 21       | 0        | 0.0%  | 0         | 0.0%  | 0         | 0.0%   |
| mmu-mir-877-5p | 17  | 36097740 | 36097759 | -      | edit | 22       | 0        | 0.0%  | 0         | 0.0%  | 0         | 0.0%   |
| EDITED         |     |          |          |        |      |          | 4        | 0.7%  | 7         | 2.0%  | 0         | 0.0%   |
| CANONICAL      |     |          |          |        |      |          | 497      | 99.3% | 349       | 98.0% | 297       | 100.0% |
| TOTAL          |     |          |          |        |      |          | 501      |       | 356       |       | 297       |        |



| miRNA          | Chr | Start    | Stop     | Strand | Type | Position | P7 reads | P7%    | P10 reads | P10%   | P14 reads | P14%  |
|----------------|-----|----------|----------|--------|------|----------|----------|--------|-----------|--------|-----------|-------|
| mmu-mir-878-3p | X   | 64054693 | 64054714 | -      | edit | 1        | 0        | 0.0%   | 0         | 0.0%   | 0         | 0.0%  |
| mmu-mir-878-3p | X   | 64054693 | 64054714 | -      | edit | 2        | 0        | 0.0%   | 0         | 0.0%   | 0         | 0.0%  |
| mmu-mir-878-3p | X   | 64054693 | 64054714 | -      | edit | 3        | 0        | 0.0%   | 0         | 0.0%   | 0         | 0.0%  |
| mmu-mir-878-3p | X   | 64054693 | 64054714 | -      | edit | 4        | 0        | 0.0%   | 0         | 0.0%   | 0         | 0.0%  |
| mmu-mir-878-3p | X   | 64054693 | 64054714 | -      | edit | 5        | 0        | 0.0%   | 0         | 0.0%   | 0         | 0.0%  |
| mmu-mir-878-3p | X   | 64054693 | 64054714 | -      | edit | 6        | 0        | 0.0%   | 0         | 0.0%   | 0         | 0.0%  |
| mmu-mir-878-3p | X   | 64054693 | 64054714 | -      | edit | 7        | 0        | 0.0%   | 0         | 0.0%   | 0         | 0.0%  |
| mmu-mir-878-3p | X   | 64054693 | 64054714 | -      | edit | 8        | 0        | 0.0%   | 0         | 0.0%   | 0         | 0.0%  |
| mmu-mir-878-3p | X   | 64054693 | 64054714 | -      | edit | 9        | 0        | 0.0%   | 0         | 0.0%   | 0         | 0.0%  |
| mmu-mir-878-3p | X   | 64054693 | 64054714 | -      | edit | 10       | 0        | 0.0%   | 0         | 0.0%   | 0         | 0.0%  |
| mmu-mir-878-3p | X   | 64054693 | 64054714 | -      | edit | 11       | 0        | 0.0%   | 0         | 0.0%   | 0         | 0.0%  |
| mmu-mir-878-3p | X   | 64054693 | 64054714 | -      | edit | 12       | 0        | 0.0%   | 0         | 0.0%   | 0         | 0.0%  |
| mmu-mir-878-3p | X   | 64054693 | 64054714 | -      | edit | 13       | 0        | 0.0%   | 0         | 0.0%   | 0         | 0.0%  |
| mmu-mir-878-3p | X   | 64054693 | 64054714 | -      | edit | 14       | 0        | 0.0%   | 0         | 0.0%   | 0         | 0.0%  |
| mmu-mir-878-3p | X   | 64054693 | 64054714 | -      | edit | 15       | 0        | 0.0%   | 0         | 0.0%   | 3         | 1.7%  |
| mmu-mir-878-3p | X   | 64054693 | 64054714 | -      | edit | 16       | 0        | 0.0%   | 0         | 0.0%   | 0         | 0.0%  |
| mmu-mir-878-3p | X   | 64054693 | 64054714 | -      | edit | 17       | 0        | 0.0%   | 0         | 0.0%   | 0         | 0.0%  |
| mmu-mir-878-3p | X   | 64054693 | 64054714 | -      | edit | 18       | 0        | 0.0%   | 0         | 0.0%   | 0         | 0.0%  |
| mmu-mir-878-3p | X   | 64054693 | 64054714 | -      | edit | 19       | 0        | 0.0%   | 0         | 0.0%   | 9         | 5.0%  |
| mmu-mir-878-3p | X   | 64054693 | 64054714 | -      | edit | 20       | 0        | 0.0%   | 0         | 0.0%   | 0         | 0.0%  |
| mmu-mir-878-3p | X   | 64054693 | 64054714 | -      | edit | 21       | 0        | 0.0%   | 0         | 0.0%   | 0         | 0.0%  |
| mmu-mir-878-3p | X   | 64054693 | 64054714 | -      | edit | 22       | 0        | 0.0%   | 0         | 0.0%   | 0         | 0.0%  |
| EDITED         |     |          |          |        |      |          | 0        | 0.0%   | 0         | 0.0%   | 12        | 6.6%  |
| CANONICAL      |     |          |          |        |      |          | 26       | 100.0% | 118       | 100.0% | 169       | 93.4% |
| TOTAL          |     |          |          |        |      |          | 26       |        | 118       |        | 181       |       |

| miRNA          | Chr | Start    | Stop     | Strand | Type  | Position | P7 reads | P7%    | P10 reads | P10%   | P14 reads | P14%  |
|----------------|-----|----------|----------|--------|-------|----------|----------|--------|-----------|--------|-----------|-------|
| mmu-mir-878-5p | X   | 64054729 | 64054750 | -      | Indel | 22       | 0        | 0.0%   | 0         | 0.0%   | 3         | 0.7%  |
| mmu-mir-878-5p | X   | 64054729 | 64054750 | -      | edit  | 1        | 0        | 0.0%   | 0         | 0.0%   | 0         | 0.0%  |
| mmu-mir-878-5p | X   | 64054729 | 64054750 | -      | edit  | 2        | 0        | 0.0%   | 0         | 0.0%   | 0         | 0.0%  |
| mmu-mir-878-5p | X   | 64054729 | 64054750 | -      | edit  | 3        | 0        | 0.0%   | 0         | 0.0%   | 0         | 0.0%  |
| mmu-mir-878-5p | X   | 64054729 | 64054750 | -      | edit  | 4        | 0        | 0.0%   | 0         | 0.0%   | 0         | 0.0%  |
| mmu-mir-878-5p | X   | 64054729 | 64054750 | -      | edit  | 5        | 0        | 0.0%   | 0         | 0.0%   | 0         | 0.0%  |
| mmu-mir-878-5p | X   | 64054729 | 64054750 | -      | edit  | 6        | 0        | 0.0%   | 0         | 0.0%   | 0         | 0.0%  |
| mmu-mir-878-5p | X   | 64054729 | 64054750 | -      | edit  | 7        | 0        | 0.0%   | 0         | 0.0%   | 0         | 0.0%  |
| mmu-mir-878-5p | X   | 64054729 | 64054750 | -      | edit  | 8        | 0        | 0.0%   | 0         | 0.0%   | 0         | 0.0%  |
| mmu-mir-878-5p | X   | 64054729 | 64054750 | -      | edit  | 9        | 0        | 0.0%   | 0         | 0.0%   | 0         | 0.0%  |
| mmu-mir-878-5p | X   | 64054729 | 64054750 | -      | edit  | 10       | 0        | 0.0%   | 0         | 0.0%   | 0         | 0.0%  |
| mmu-mir-878-5p | X   | 64054729 | 64054750 | -      | edit  | 11       | 0        | 0.0%   | 0         | 0.0%   | 0         | 0.0%  |
| mmu-mir-878-5p | X   | 64054729 | 64054750 | -      | edit  | 12       | 0        | 0.0%   | 0         | 0.0%   | 0         | 0.0%  |
| mmu-mir-878-5p | X   | 64054729 | 64054750 | -      | edit  | 13       | 0        | 0.0%   | 0         | 0.0%   | 0         | 0.0%  |
| mmu-mir-878-5p | X   | 64054729 | 64054750 | -      | edit  | 14       | 0        | 0.0%   | 0         | 0.0%   | 0         | 0.0%  |
| mmu-mir-878-5p | X   | 64054729 | 64054750 | -      | edit  | 15       | 0        | 0.0%   | 0         | 0.0%   | 0         | 0.0%  |
| mmu-mir-878-5p | X   | 64054729 | 64054750 | -      | edit  | 16       | 0        | 0.0%   | 0         | 0.0%   | 3         | 0.7%  |
| mmu-mir-878-5p | X   | 64054729 | 64054750 | -      | edit  | 17       | 0        | 0.0%   | 0         | 0.0%   | 0         | 0.0%  |
| mmu-mir-878-5p | X   | 64054729 | 64054750 | -      | edit  | 18       | 0        | 0.0%   | 0         | 0.0%   | 0         | 0.0%  |
| mmu-mir-878-5p | X   | 64054729 | 64054750 | -      | edit  | 19       | 0        | 0.0%   | 0         | 0.0%   | 0         | 0.0%  |
| mmu-mir-878-5p | X   | 64054729 | 64054750 | -      | edit  | 20       | 0        | 0.0%   | 0         | 0.0%   | 0         | 0.0%  |
| mmu-mir-878-5p | X   | 64054729 | 64054750 | -      | edit  | 21       | 0        | 0.0%   | 0         | 0.0%   | 0         | 0.0%  |
| mmu-mir-878-5p | X   | 64054729 | 64054750 | -      | edit  | 22       | 0        | 0.0%   | 0         | 0.0%   | 0         | 0.0%  |
| EDITED         |     |          |          |        |       |          | 0        | 0.0%   | 0         | 0.0%   | 6         | 1.4%  |
| CANONICAL      |     |          |          |        |       |          | 124      | 100.0% | 310       | 100.0% | 422       | 98.6% |
| TOTAL          |     |          |          |        |       |          | 124      |        | 310       |        | 428       |       |

| miRNA          | Chr | Start    | Stop     | Strand | Type  | Position | P7 reads | P7%   | P10 reads | P10%  | P14 reads | P14%  |
|----------------|-----|----------|----------|--------|-------|----------|----------|-------|-----------|-------|-----------|-------|
| mmu-mir-880-5p | X   | 64053715 | 64053736 | -      | Indel | 22       | 0        | 0.0%  | 0         | 0.0%  | 4         | 0.6%  |
| mmu-mir-880-5p | X   | 64053715 | 64053736 | -      | edit  | 1        | 0        | 0.0%  | 0         | 0.0%  | 0         | 0.0%  |
| mmu-mir-880-5p | X   | 64053715 | 64053736 | -      | edit  | 2        | 0        | 0.0%  | 0         | 0.0%  | 0         | 0.0%  |
| mmu-mir-880-5p | X   | 64053715 | 64053736 | -      | edit  | 3        | 0        | 0.0%  | 0         | 0.0%  | 0         | 0.0%  |
| mmu-mir-880-5p | X   | 64053715 | 64053736 | -      | edit  | 4        | 0        | 0.0%  | 0         | 0.0%  | 0         | 0.0%  |
| mmu-mir-880-5p | X   | 64053715 | 64053736 | -      | edit  | 5        | 0        | 0.0%  | 0         | 0.0%  | 0         | 0.0%  |
| mmu-mir-880-5p | X   | 64053715 | 64053736 | -      | edit  | 6        | 0        | 0.0%  | 0         | 0.0%  | 0         | 0.0%  |
| mmu-mir-880-5p | X   | 64053715 | 64053736 | -      | edit  | 7        | 0        | 0.0%  | 0         | 0.0%  | 0         | 0.0%  |
| mmu-mir-880-5p | X   | 64053715 | 64053736 | -      | edit  | 8        | 0        | 0.0%  | 0         | 0.0%  | 0         | 0.0%  |
| mmu-mir-880-5p | X   | 64053715 | 64053736 | -      | edit  | 9        | 0        | 0.0%  | 0         | 0.0%  | 0         | 0.0%  |
| mmu-mir-880-5p | X   | 64053715 | 64053736 | -      | edit  | 10       | 0        | 0.0%  | 0         | 0.0%  | 0         | 0.0%  |
| mmu-mir-880-5p | X   | 64053715 | 64053736 | -      | edit  | 11       | 0        | 0.0%  | 0         | 0.0%  | 0         | 0.0%  |
| mmu-mir-880-5p | X   | 64053715 | 64053736 | -      | edit  | 12       | 0        | 0.0%  | 0         | 0.0%  | 0         | 0.0%  |
| mmu-mir-880-5p | X   | 64053715 | 64053736 | -      | edit  | 13       | 0        | 0.0%  | 0         | 0.0%  | 0         | 0.0%  |
| mmu-mir-880-5p | X   | 64053715 | 64053736 | -      | edit  | 14       | 0        | 0.0%  | 0         | 0.0%  | 0         | 0.0%  |
| mmu-mir-880-5p | X   | 64053715 | 64053736 | -      | edit  | 15       | 0        | 0.0%  | 0         | 0.0%  | 0         | 0.0%  |
| mmu-mir-880-5p | X   | 64053715 | 64053736 | -      | edit  | 16       | 0        | 0.0%  | 0         | 0.0%  | 0         | 0.0%  |
| mmu-mir-880-5p | X   | 64053715 | 64053736 | -      | edit  | 17       | 0        | 0.0%  | 19        | 2.5%  | 4         | 0.5%  |
| mmu-mir-880-5p | X   | 64053715 | 64053736 | -      | edit  | 18       | 0        | 0.0%  | 0         | 0.0%  | 0         | 0.0%  |
| mmu-mir-880-5p | X   | 64053715 | 64053736 | -      | edit  | 19       | 4        | 2.1%  | 0         | 0.0%  | 9         | 1.3%  |
| mmu-mir-880-5p | X   | 64053715 | 64053736 | -      | edit  | 20       | 0        | 0.0%  | 0         | 0.0%  | 0         | 0.0%  |
| mmu-mir-880-5p | X   | 64053715 | 64053736 | -      | edit  | 21       | 0        | 0.0%  | 0         | 0.0%  | 0         | 0.0%  |
| mmu-mir-880-5p | X   | 64053715 | 64053736 | -      | edit  | 22       | 0        | 0.0%  | 0         | 0.0%  | 0         | 0.0%  |
| EDITED         |     |          |          |        |       |          | 4        | 2.1%  | 19        | 2.5%  | 17        | 2.4%  |
| CANONICAL      |     |          |          |        |       |          | 191      | 97.9% | 731       | 97.5% | 685       | 97.6% |
| TOTAL          |     |          |          |        |       |          | 195      |       | 750       |       | 702       |       |

| miRNA          | Chr | Start    | Stop     | Strand | Type  | Position | P7 reads | P7%   | P10 reads | P10%  | P14 reads | P14%  |
|----------------|-----|----------|----------|--------|-------|----------|----------|-------|-----------|-------|-----------|-------|
| mmu-mir-881-3p | X   | 64055129 | 64055150 | -      | Indel | 22       | 0        | 0.0%  | 8         | 0.2%  | 21        | 0.4%  |
| mmu-mir-881-3p | X   | 64055129 | 64055150 | -      | edit  | 1        | 0        | 0.0%  | 0         | 0.0%  | 0         | 0.0%  |
| mmu-mir-881-3p | X   | 64055129 | 64055150 | -      | edit  | 2        | 0        | 0.0%  | 0         | 0.0%  | 0         | 0.0%  |
| mmu-mir-881-3p | X   | 64055129 | 64055150 | -      | edit  | 3        | 0        | 0.0%  | 0         | 0.0%  | 0         | 0.0%  |
| mmu-mir-881-3p | X   | 64055129 | 64055150 | -      | edit  | 4        | 4        | 0.2%  | 0         | 0.0%  | 3         | 0.1%  |
| mmu-mir-881-3p | X   | 64055129 | 64055150 | -      | edit  | 5        | 0        | 0.0%  | 0         | 0.0%  | 0         | 0.0%  |
| mmu-mir-881-3p | X   | 64055129 | 64055150 | -      | edit  | 6        | 0        | 0.0%  | 0         | 0.0%  | 0         | 0.0%  |
| mmu-mir-881-3p | X   | 64055129 | 64055150 | -      | edit  | 7        | 0        | 0.0%  | 0         | 0.0%  | 0         | 0.0%  |
| mmu-mir-881-3p | X   | 64055129 | 64055150 | -      | edit  | 8        | 3        | 0.2%  | 4         | 0.1%  | 9         | 0.2%  |
| mmu-mir-881-3p | X   | 64055129 | 64055150 | -      | edit  | 9        | 0        | 0.0%  | 0         | 0.0%  | 0         | 0.0%  |
| mmu-mir-881-3p | X   | 64055129 | 64055150 | -      | edit  | 10       | 0        | 0.0%  | 0         | 0.0%  | 0         | 0.0%  |
| mmu-mir-881-3p | X   | 64055129 | 64055150 | -      | edit  | 11       | 0        | 0.0%  | 0         | 0.0%  | 0         | 0.0%  |
| mmu-mir-881-3p | X   | 64055129 | 64055150 | -      | edit  | 12       | 0        | 0.0%  | 0         | 0.0%  | 0         | 0.0%  |
| mmu-mir-881-3p | X   | 64055129 | 64055150 | -      | edit  | 13       | 0        | 0.0%  | 0         | 0.0%  | 0         | 0.0%  |
| mmu-mir-881-3p | X   | 64055129 | 64055150 | -      | edit  | 14       | 0        | 0.0%  | 0         | 0.0%  | 0         | 0.0%  |
| mmu-mir-881-3p | X   | 64055129 | 64055150 | -      | edit  | 15       | 0        | 0.0%  | 0         | 0.0%  | 6         | 0.1%  |
| mmu-mir-881-3p | X   | 64055129 | 64055150 | -      | edit  | 16       | 0        | 0.0%  | 0         | 0.0%  | 0         | 0.0%  |
| mmu-mir-881-3p | X   | 64055129 | 64055150 | -      | edit  | 17       | 6        | 0.3%  | 60        | 1.5%  | 20        | 0.4%  |
| mmu-mir-881-3p | X   | 64055129 | 64055150 | -      | edit  | 18       | 0        | 0.0%  | 0         | 0.0%  | 0         | 0.0%  |
| mmu-mir-881-3p | X   | 64055129 | 64055150 | -      | edit  | 19       | 0        | 0.0%  | 3         | 0.1%  | 5         | 0.1%  |
| mmu-mir-881-3p | X   | 64055129 | 64055150 | -      | edit  | 20       | 0        | 0.0%  | 0         | 0.0%  | 0         | 0.0%  |
| mmu-mir-881-3p | X   | 64055129 | 64055150 | -      | edit  | 21       | 0        | 0.0%  | 0         | 0.0%  | 0         | 0.0%  |
| mmu-mir-881-3p | X   | 64055129 | 64055150 | -      | edit  | 22       | 0        | 0.0%  | 0         | 0.0%  | 0         | 0.0%  |
| EDITED         |     |          |          |        |       |          | 13       | 0.7%  | 75        | 1.8%  | 64        | 1.1%  |
| CANONICAL      |     |          |          |        |       |          | 1735     | 99.3% | 4020      | 98.2% | 5516      | 98.9% |
| TOTAL          |     |          |          |        |       |          | 1748     |       | 4095      |       | 5580      |       |

| miRNA           | Chr | Start    | Stop     | Strand | Type | Position | P7 reads | P7%   | P10 reads | P10%  | P14 reads | P14%  |
|-----------------|-----|----------|----------|--------|------|----------|----------|-------|-----------|-------|-----------|-------|
| mmu-mir-883a-3p | X   | 64033943 | 64033964 | -      | edit | 1        | 0        | 0.0%  | 0         | 0.0%  | 0         | 0.0%  |
| mmu-mir-883a-3p | X   | 64033943 | 64033964 | -      | edit | 2        | 0        | 0.0%  | 0         | 0.0%  | 0         | 0.0%  |
| mmu-mir-883a-3p | X   | 64033943 | 64033964 | -      | edit | 3        | 0        | 0.0%  | 0         | 0.0%  | 0         | 0.0%  |
| mmu-mir-883a-3p | X   | 64033943 | 64033964 | -      | edit | 4        | 0        | 0.0%  | 0         | 0.0%  | 0         | 0.0%  |
| mmu-mir-883a-3p | X   | 64033943 | 64033964 | -      | edit | 5        | 0        | 0.0%  | 0         | 0.0%  | 0         | 0.0%  |
| mmu-mir-883a-3p | X   | 64033943 | 64033964 | -      | edit | 6        | 0        | 0.0%  | 0         | 0.0%  | 0         | 0.0%  |
| mmu-mir-883a-3p | X   | 64033943 | 64033964 | -      | edit | 7        | 0        | 0.0%  | 0         | 0.0%  | 0         | 0.0%  |
| mmu-mir-883a-3p | X   | 64033943 | 64033964 | -      | edit | 8        | 0        | 0.0%  | 0         | 0.0%  | 0         | 0.0%  |
| mmu-mir-883a-3p | X   | 64033943 | 64033964 | -      | edit | 9        | 0        | 0.0%  | 0         | 0.0%  | 0         | 0.0%  |
| mmu-mir-883a-3p | X   | 64033943 | 64033964 | -      | edit | 10       | 0        | 0.0%  | 0         | 0.0%  | 0         | 0.0%  |
| mmu-mir-883a-3p | X   | 64033943 | 64033964 | -      | edit | 11       | 0        | 0.0%  | 0         | 0.0%  | 0         | 0.0%  |
| mmu-mir-883a-3p | X   | 64033943 | 64033964 | -      | edit | 12       | 0        | 0.0%  | 0         | 0.0%  | 0         | 0.0%  |
| mmu-mir-883a-3p | X   | 64033943 | 64033964 | -      | edit | 13       | 0        | 0.0%  | 0         | 0.0%  | 0         | 0.0%  |
| mmu-mir-883a-3p | X   | 64033943 | 64033964 | -      | edit | 14       | 0        | 0.0%  | 0         | 0.0%  | 0         | 0.0%  |
| mmu-mir-883a-3p | X   | 64033943 | 64033964 | -      | edit | 15       | 0        | 0.0%  | 3         | 0.1%  | 6         | 0.1%  |
| mmu-mir-883a-3p | X   | 64033943 | 64033964 | -      | edit | 16       | 0        | 0.0%  | 0         | 0.0%  | 11        | 0.2%  |
| mmu-mir-883a-3p | X   | 64033943 | 64033964 | -      | edit | 17       | 0        | 0.0%  | 3         | 0.1%  | 5         | 0.1%  |
| mmu-mir-883a-3p | X   | 64033943 | 64033964 | -      | edit | 18       | 0        | 0.0%  | 35        | 1.1%  | 13        | 0.3%  |
| mmu-mir-883a-3p | X   | 64033943 | 64033964 | -      | edit | 19       | 0        | 0.0%  | 0         | 0.0%  | 0         | 0.0%  |
| mmu-mir-883a-3p | X   | 64033943 | 64033964 | -      | edit | 20       | 11       | 0.8%  | 10        | 0.3%  | 28        | 0.6%  |
| mmu-mir-883a-3p | X   | 64033943 | 64033964 | -      | edit | 21       | 0        | 0.0%  | 0         | 0.0%  | 0         | 0.0%  |
| mmu-mir-883a-3p | X   | 64033943 | 64033964 | -      | edit | 22       | 0        | 0.0%  | 0         | 0.0%  | 0         | 0.0%  |
| EDITED          |     |          |          |        |      |          | 11       | 0.8%  | 51        | 1.6%  | 63        | 1.3%  |
| CANONICAL       |     |          |          |        |      |          | 1348     | 99.2% | 3082      | 98.4% | 4615      | 98.7% |
| TOTAL           |     |          |          |        |      |          | 1359     |       | 3133      |       | 4678      |       |

| miRNA           | Chr | Start    | Stop     | Strand | Type | Position | P7 reads | P7%   | P10 reads | P10%  | P14 reads | P14%  |
|-----------------|-----|----------|----------|--------|------|----------|----------|-------|-----------|-------|-----------|-------|
| mmu-mir-883b-5p | X   | 64043111 | 64043132 | -      | edit | 1        | 0        | 0.0%  | 0         | 0.0%  | 0         | 0.0%  |
| mmu-mir-883b-5p | X   | 64043111 | 64043132 | -      | edit | 2        | 0        | 0.0%  | 0         | 0.0%  | 0         | 0.0%  |
| mmu-mir-883b-5p | X   | 64043111 | 64043132 | -      | edit | 3        | 0        | 0.0%  | 0         | 0.0%  | 0         | 0.0%  |
| mmu-mir-883b-5p | X   | 64043111 | 64043132 | -      | edit | 4        | 0        | 0.0%  | 0         | 0.0%  | 0         | 0.0%  |
| mmu-mir-883b-5p | X   | 64043111 | 64043132 | -      | edit | 5        | 0        | 0.0%  | 0         | 0.0%  | 0         | 0.0%  |
| mmu-mir-883b-5p | X   | 64043111 | 64043132 | -      | edit | 6        | 0        | 0.0%  | 0         | 0.0%  | 0         | 0.0%  |
| mmu-mir-883b-5p | X   | 64043111 | 64043132 | -      | edit | 7        | 0        | 0.0%  | 0         | 0.0%  | 0         | 0.0%  |
| mmu-mir-883b-5p | X   | 64043111 | 64043132 | -      | edit | 8        | 0        | 0.0%  | 0         | 0.0%  | 0         | 0.0%  |
| mmu-mir-883b-5p | X   | 64043111 | 64043132 | -      | edit | 9        | 0        | 0.0%  | 0         | 0.0%  | 0         | 0.0%  |
| mmu-mir-883b-5p | X   | 64043111 | 64043132 | -      | edit | 10       | 0        | 0.0%  | 0         | 0.0%  | 0         | 0.0%  |
| mmu-mir-883b-5p | X   | 64043111 | 64043132 | -      | edit | 11       | 0        | 0.0%  | 0         | 0.0%  | 0         | 0.0%  |
| mmu-mir-883b-5p | X   | 64043111 | 64043132 | -      | edit | 12       | 0        | 0.0%  | 0         | 0.0%  | 0         | 0.0%  |
| mmu-mir-883b-5p | X   | 64043111 | 64043132 | -      | edit | 13       | 0        | 0.0%  | 0         | 0.0%  | 0         | 0.0%  |
| mmu-mir-883b-5p | X   | 64043111 | 64043132 | -      | edit | 14       | 0        | 0.0%  | 0         | 0.0%  | 0         | 0.0%  |
| mmu-mir-883b-5p | X   | 64043111 | 64043132 | -      | edit | 15       | 0        | 0.0%  | 0         | 0.0%  | 0         | 0.0%  |
| mmu-mir-883b-5p | X   | 64043111 | 64043132 | -      | edit | 16       | 0        | 0.0%  | 0         | 0.0%  | 0         | 0.0%  |
| mmu-mir-883b-5p | X   | 64043111 | 64043132 | -      | edit | 17       | 0        | 0.0%  | 4         | 1.2%  | 0         | 0.0%  |
| mmu-mir-883b-5p | X   | 64043111 | 64043132 | -      | edit | 18       | 0        | 0.0%  | 0         | 0.0%  | 0         | 0.0%  |
| mmu-mir-883b-5p | X   | 64043111 | 64043132 | -      | edit | 19       | 0        | 0.0%  | 0         | 0.0%  | 0         | 0.0%  |
| mmu-mir-883b-5p | X   | 64043111 | 64043132 | -      | edit | 20       | 0        | 0.0%  | 0         | 0.0%  | 0         | 0.0%  |
| mmu-mir-883b-5p | X   | 64043111 | 64043132 | -      | edit | 21       | 3        | 1.8%  | 3         | 0.9%  | 8         | 2.9%  |
| mmu-mir-883b-5p | X   | 64043111 | 64043132 | -      | edit | 22       | 0        | 0.0%  | 0         | 0.0%  | 0         | 0.0%  |
| EDITED          |     |          |          |        |      |          | 3        | 1.8%  | 7         | 2.1%  | 8         | 2.9%  |
| CANONICAL       |     |          |          |        |      |          | 163      | 98.2% | 332       | 97.9% | 268       | 97.1% |
| TOTAL           |     |          |          |        |      |          | 166      |       | 339       |       | 276       |       |
